# Supplementary material for: Synthetic studies towards naturally occurring γ-(Z)/(E)-alkylidenebutenolides through bimetallic cascade cyclization and an adventitious photoisomerization method
Source: Royal Society of Chemistry journal article supplement (doi:10.1039/d2ob00166g), 2022-01-01

**Synthetic studies towards naturally occurring  $\gamma$ -(*Z*)/(*E*)-alkylidenebutenolides through bimetallic cascade cyclization and an adventitious photoisomerization method**

Shrestha Chatterjee, Ranjan Kumar Acharyya, Pratik Pal, and Samik Nanda\*

Department of Chemistry, Indian Institute of Technology Kharagpur, Kharagpur, 721302,  
India

| <b>Contents</b>                                                            | <b>P No</b>    |
|----------------------------------------------------------------------------|----------------|
| Experimental procedures for few known compounds                            | 2-4            |
| $^1\text{H}/^{13}\text{C}$ and DEPT-135 NMR spectra for selected compounds | 5- 55 & 57-104 |
| UV-Vis spectra for few $\gamma$ -( <i>Z</i> )-alkylidenebutenolides        | 56             |



(d,  $J = 4.7$  Hz, 5H), 7.32 – 7.25 (m, 3H), 5.0 (d, 1.9 Hz, 1H) 1.13 (s, 9H). HRMS (ESI)  $m/z$ : for  $C_{24}H_{26}O_2SiNa[M + Na]^+$ , calculated: 397.1600; found: 397.1609.

**Synthesis of compound 43:** Compound **43** was synthesized according to known procedure starting from  $C_2$ -symmetric L-DET.<sup>2</sup>

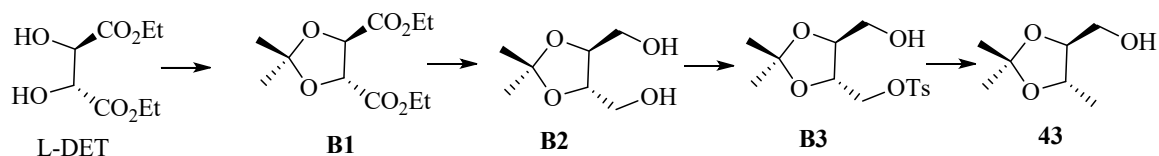

**((4*R*,5*R*)-diethyl 2,2-dimethyl-1,3-dioxolane-4,5-dicarboxylate (B1):** To a stirred solution

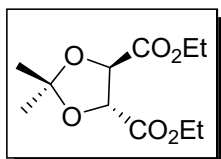

of diethyl *L*-tartrate in dry toluene, fitted with Dean-Stark apparatus, 2,2-DMP and PTSA were added. The reaction was then heated to reflux for 12 h. After completion of the reaction, it was quenched with a saturated solution of  $NaHCO_3$ . The mixture was then extracted with ethyl acetate (30 mL  $\times$  2). The combined organic layer was washed with brine, dried over anhydrous  $Na_2SO_4$ , and evaporated under reduced pressure. The crude product was then purified with flash column chromatography to afford compound **B1** as a colorless liquid in a 95% yield. The spectral data of **B1** matches well with the previous literature report.<sup>2</sup>  $[\alpha]_D^{25} = -41.4$  (c 1.0,  $CHCl_3$ ).

**((4*S*,5*S*)-2,2-dimethyl-1,3-dioxolane-4,5-diyl)dimethanol (B2):** To a stirred suspension of

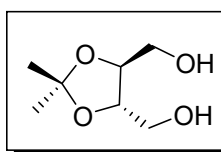

lithium aluminum hydride (LAH) in dry THF, a solution of compound **B1** in dry THF was added drop-wise at 0 °C. The reaction was warmed at room temperature and stirred for 2 h at the same temperature. After completion of the reaction, it was cooled to 0 °C and a saturated solution of  $Na_2SO_4$  was added to the reaction mixture drop-wise till a white precipitate appears. The precipitate was then filtered through a celite bed and washes with ethyl acetate. The combined filtrate was dried over anhydrous  $Na_2SO_4$  and evaporated under reduced pressure. The crude product was purified by flash column chromatography to afford the compound **B2** as a colorless liquid in 90% yield. The spectral data of **B2** matches well with the previous literature report.<sup>2</sup>  $[\alpha]_D^{25} = -24.2$  (c 1.0, MeOH).

**((4*S*,5*S*)-5-(hydroxymethyl)-2,2-dimethyl-1,3-dioxolan-4-yl)methyl-4-**

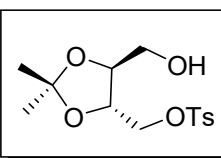

**methylbenzenesulfonate (B3):** To a stirred solution of compound **B2**, in dry DCM,  $Et_3N$  was added at 0 °C and stirred for 5 min. Freshly recrystallized tosyl chloride and DMAP were added to the reaction mixture at 0 °C and stirred for 6 h. After the complete disappearance of the starting material, the reaction was quenched with water and extracted with DCM. The organic layer was washed with brine, dried over anhydrous  $Na_2SO_4$ , and evaporated under reduced pressure. The crude reaction mixture was then purified with flash column chromatography to afford compound **B3** as a colorless liquid in 85% yield.  $[\alpha]_D^{25} = -15.2$  (c 1.0,  $CHCl_3$ ). <sup>1</sup>H NMR (400 MHz,  $CDCl_3$ )  $\delta$  7.80 – 7.75 (m, 2H), 7.33 (d,  $J = 8.1$  Hz, 2H), 4.12 (t,  $J = 4.5$  Hz, 2H), 4.10 – 4.04 (m, 1H), 3.94 (dt,  $J = 7.8, 4.0$  Hz, 1H), 3.79 – 3.70 (m, 1H), 3.61 (dd,  $J = 12.0, 4.2$  Hz, 1H), 2.43 (s, 3H), 1.36 (s, 3H), 1.32 (s, 3H). <sup>13</sup>C NMR (101

MHz, CDCl<sub>3</sub>)  $\delta$  145.1, 132.5, 129.9, 128.0, 110.0, 78.0, 74.5, 68.9, 61.7, 27.0, 26.7, 21.6. HRMS (ESI)  $m/z$ : for C<sub>14</sub>H<sub>20</sub>O<sub>6</sub>SNa[M + Na]<sup>+</sup>, calculated: 339.0878; found: 339.0885.

**((4*S*,5*S*)-2,2,5-trimethyl-1,3-dioxolan-4-yl)methanol (43)**: To a suspension of LAH in dry

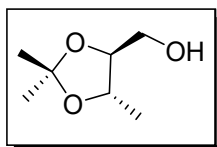

THF, a solution of compound **B3** in dry THF was added drop-wise at 0 °C. The reaction was then warmed at room temperature and stirred for 12 h. After complete consumption of the starting material, the reaction

solution was cooled to 0 °C and a saturated solution of Na<sub>2</sub>SO<sub>4</sub> was added to it drop-wise till a white precipitate appears. The precipitate was then filtered through a celite bed and washed with ethyl acetate. The combined filtrate was dried over anhydrous Na<sub>2</sub>SO<sub>4</sub> and evaporated under reduced pressure. The crude product was then purified by flash column chromatography to furnish compound **43** as a colorless liquid in 80% yield.  $[\alpha]_D^{25} = +2.3$  (c 1.0, CHCl<sub>3</sub>). <sup>1</sup>H NMR (400 MHz, CDCl<sub>3</sub>)  $\delta$  4.02 (dq,  $J = 8.3, 6.0$  Hz, 1H), 3.85 – 3.78 (m, 1H), 3.70 – 3.56 (m, 2H), 1.42 (d,  $J = 10.0$  Hz, 6H), 1.30 (d,  $J = 6.0$  Hz, 3H). <sup>13</sup>C NMR (100 MHz, CDCl<sub>3</sub>)  $\delta$  108.4, 82.7, 72.7, 61.3, 27.3, 26.9, 17.6. HRMS (ESI)  $m/z$ : for C<sub>7</sub>H<sub>14</sub>O<sub>3</sub>Na[M + Na]<sup>+</sup>, calculated: 169.0841; found: 169.0847.

## References:

1. (a) Y. Sun, X. Wan, J. Wang, Q. Meng, H. Zhang, L. Jiang, and Z. Zhang, *Org. Lett.* **2005**, *7*, 5425-5427. (b) T. Peňaška, P. Koukal, and M. Katora, *Eur. J. Org. Chem.* **2018**, 147–149.
2. (a) S. Vrbkova, M. Dracinsky, and A. Holy. *Tetrahedron: Asymmetry.* **2007**, *18*, 2233-2247. (b) L. Wang, and W. Zhu, *Tetrahedron Lett.* **2013**, *54*, 6729–6731.

### <sup>1</sup>H NMR of compound 3a (600 MHz, CDCl<sub>3</sub>)

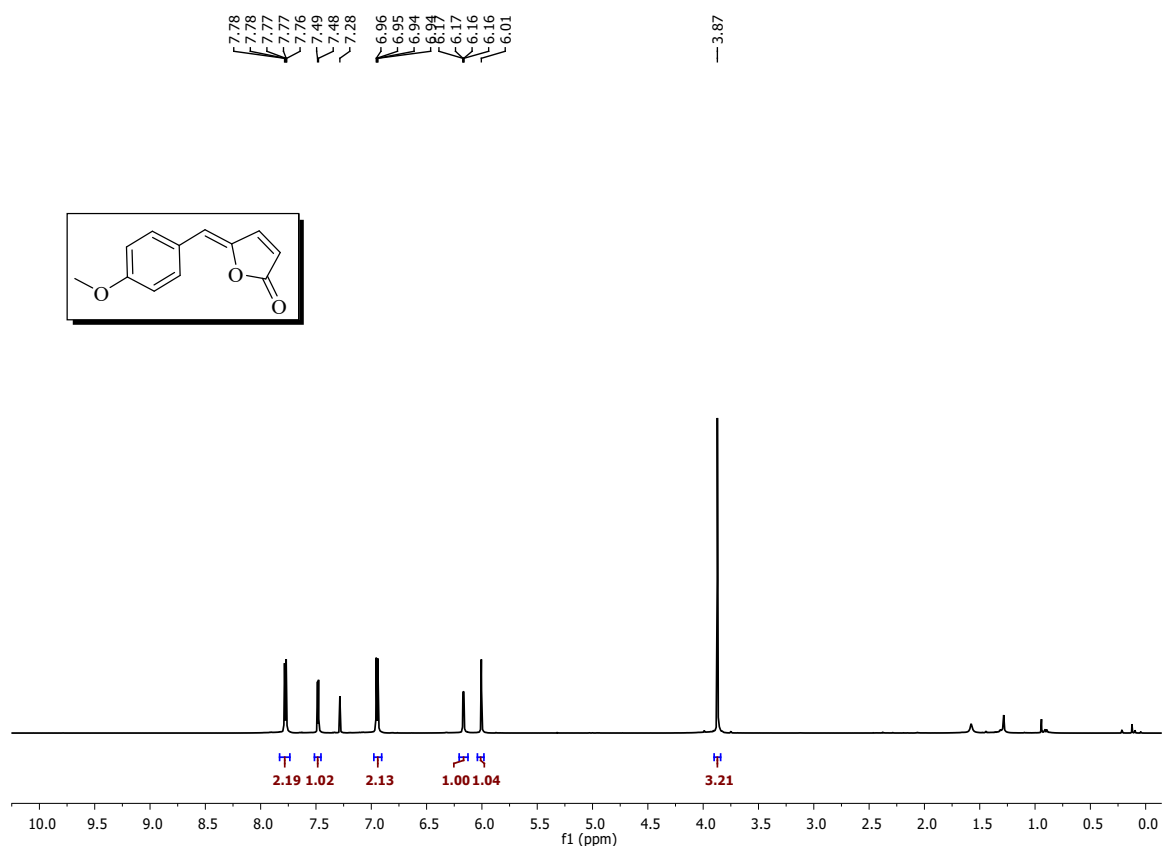

### <sup>13</sup>C NMR of compound 3a (150 MHz, CDCl<sub>3</sub>)

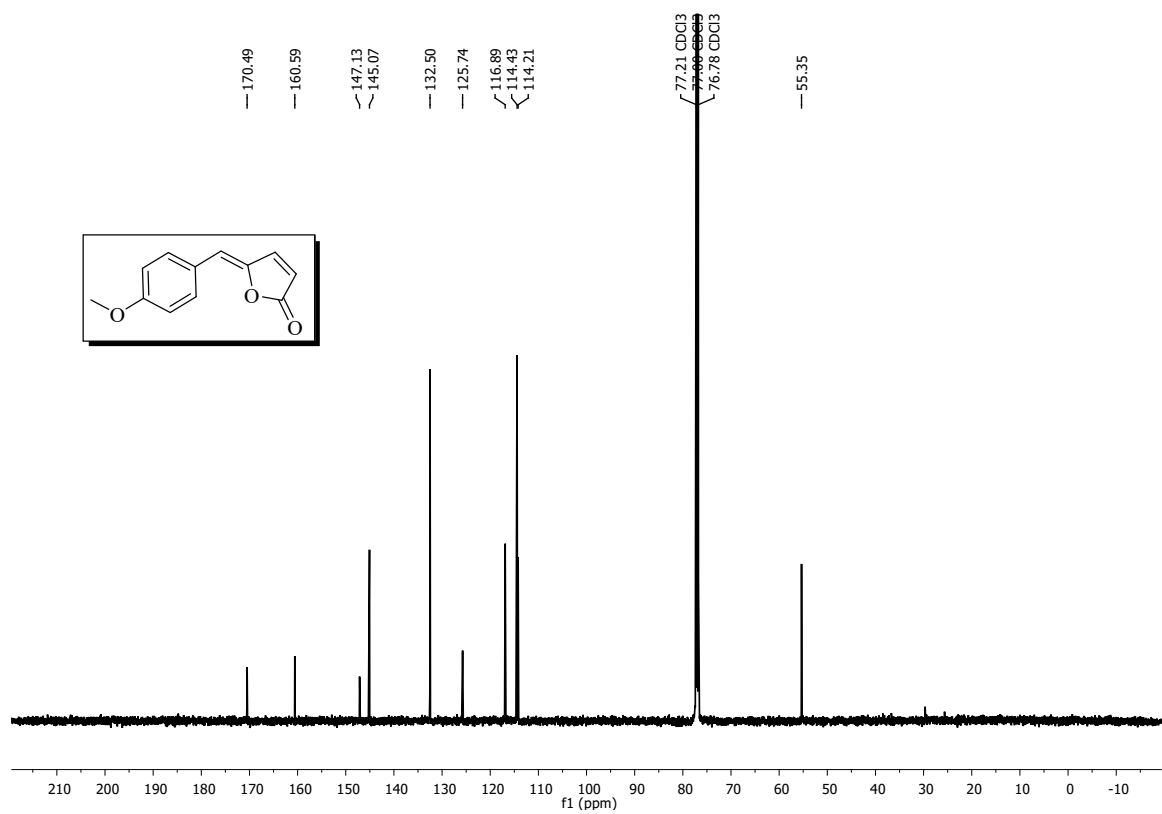

### <sup>1</sup>H NMR of compound 4a (600 MHz, CDCl<sub>3</sub>)

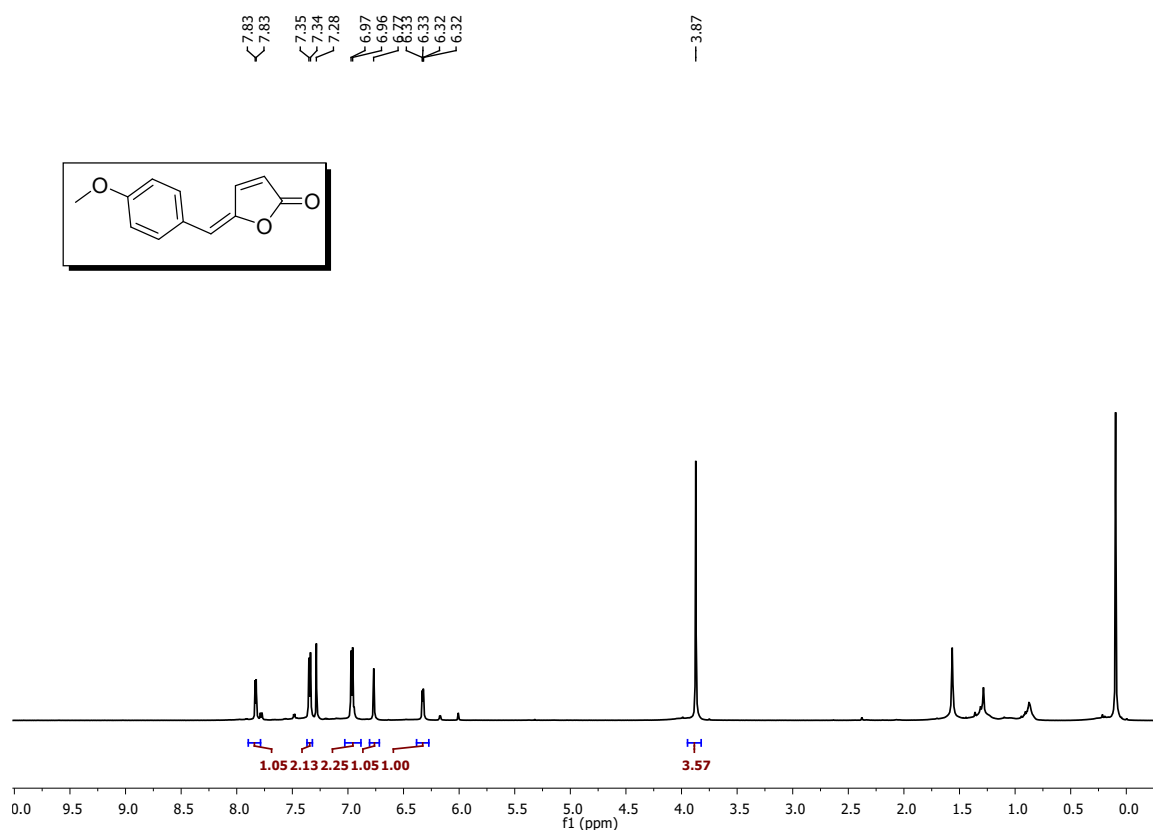

### <sup>13</sup>C NMR of compound 4a (150 MHz, CDCl<sub>3</sub>)

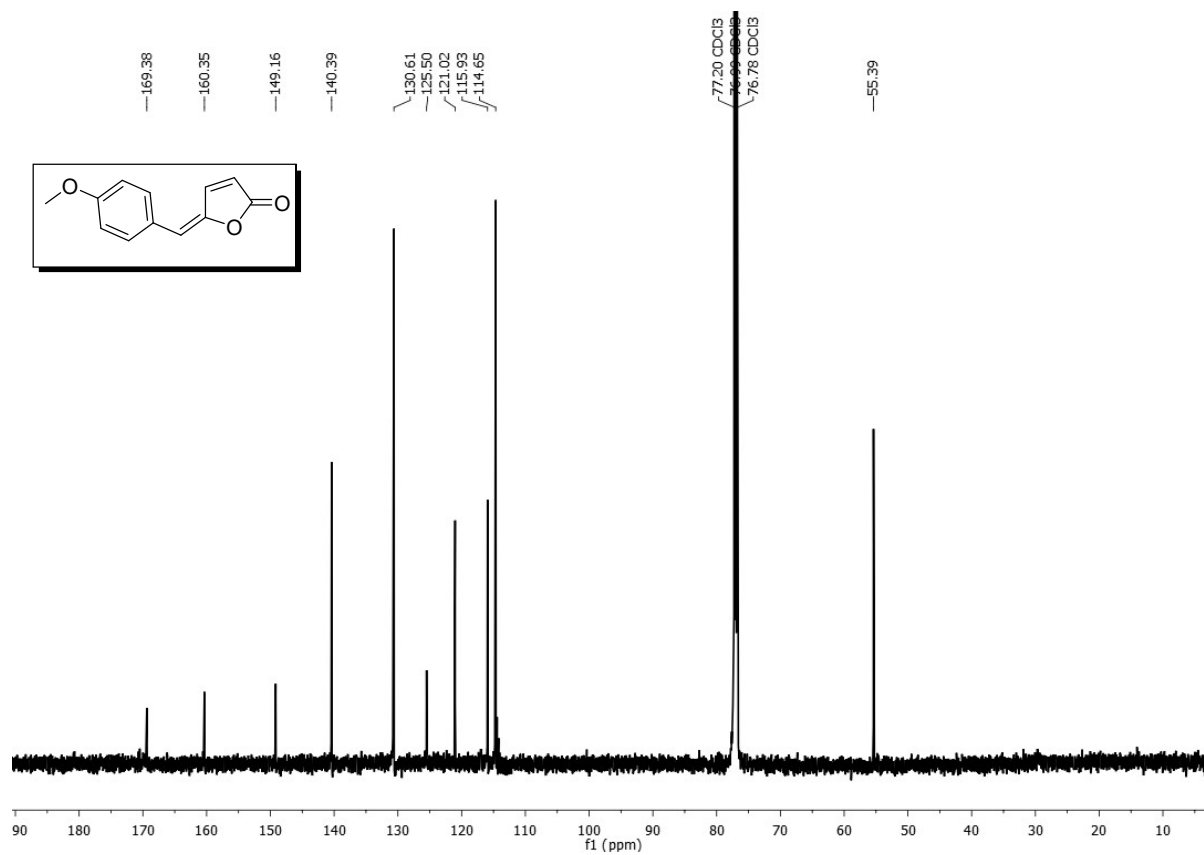

### $^1\text{H}$ NMR of compound 3b (600 MHz, $\text{CDCl}_3$ )

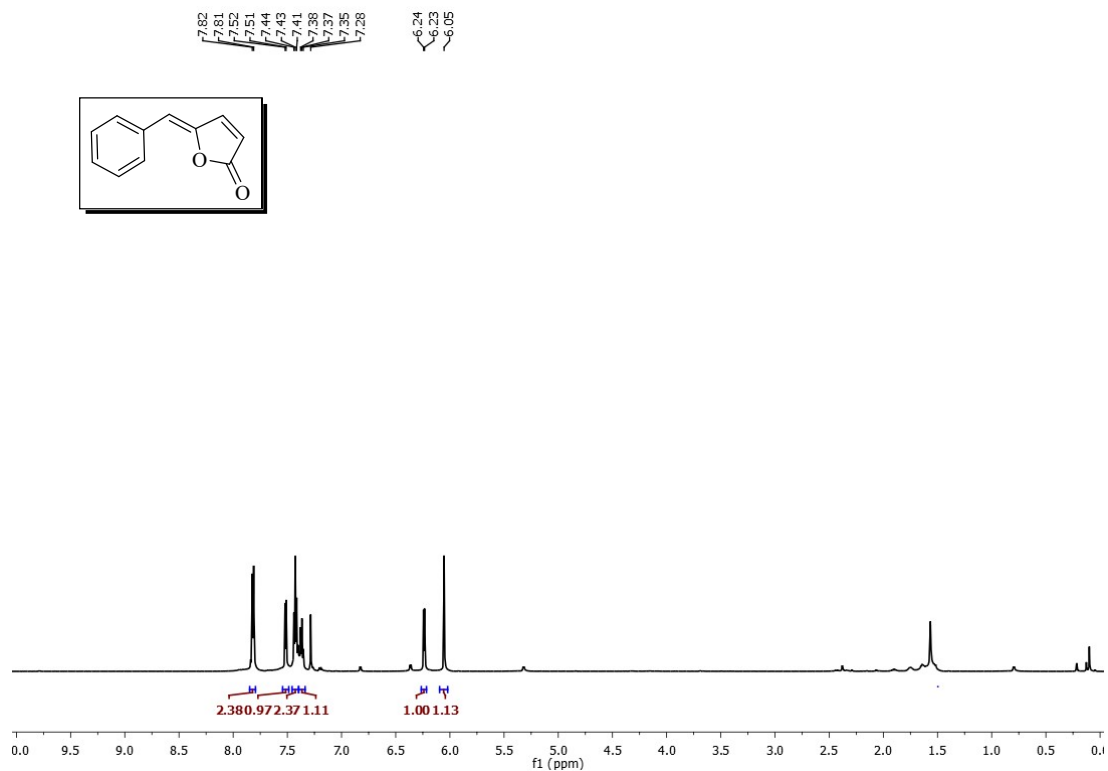

### $^{13}\text{C}$ NMR of compound 3b (150 MHz, $\text{CDCl}_3$ )

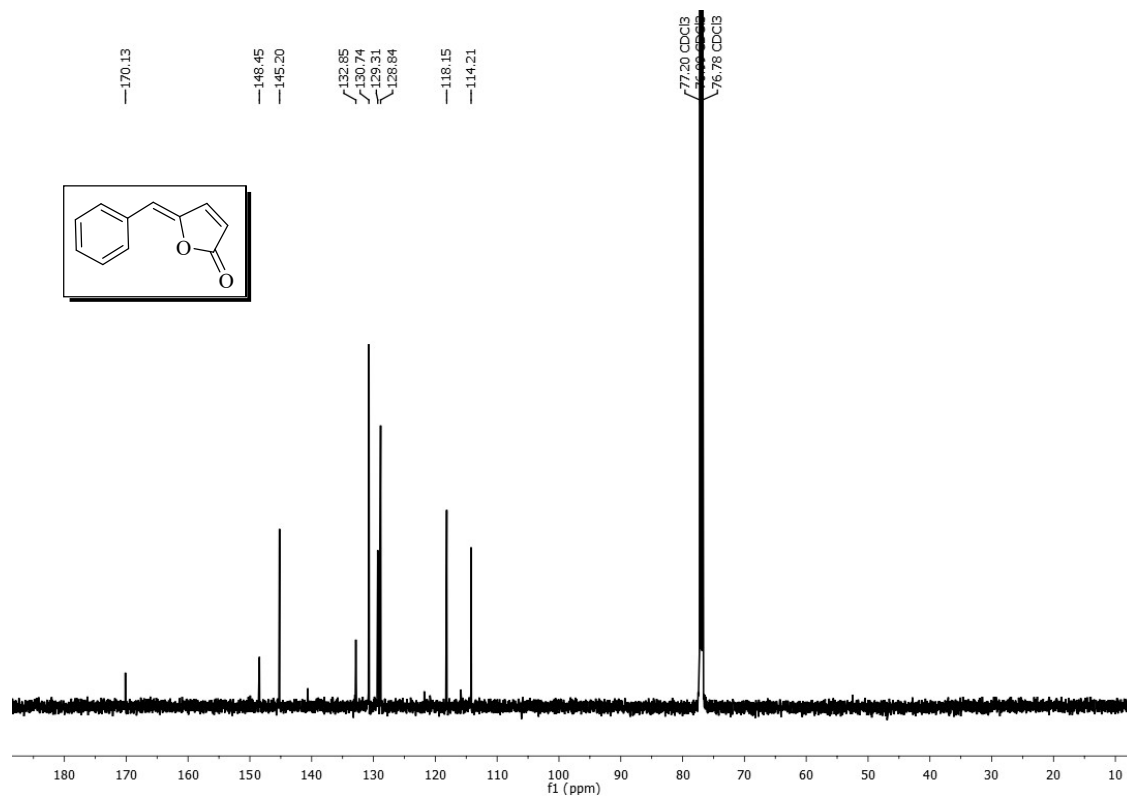

### $^1\text{H}$ NMR of compound 4b (600 MHz, $\text{CDCl}_3$ )

7.84  
7.83  
7.44  
7.43  
7.40  
7.39  
7.39  
7.38  
6.37  
6.37  
6.36  
6.36

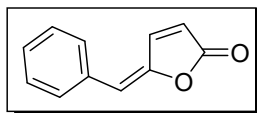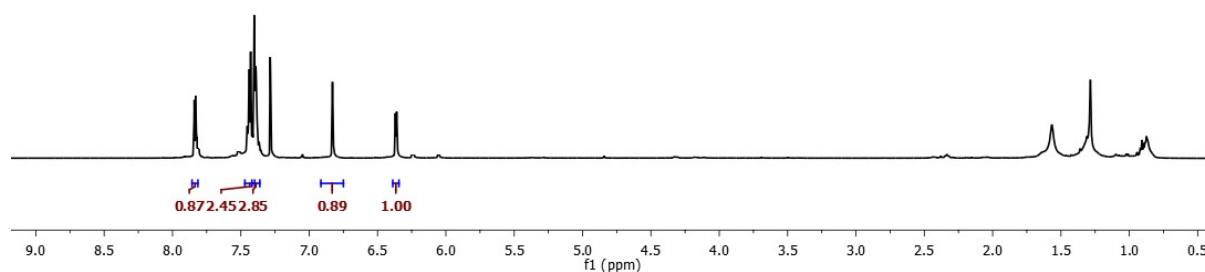

### $^{13}\text{C}$ NMR of compound 4b (150 MHz, $\text{CDCl}_3$ )

169.17  
150.27  
140.63  
130.74  
129.16  
129.03  
128.83  
121.79  
115.88  
77.19  $\text{CDCl}_3$   
76.77  $\text{CDCl}_3$

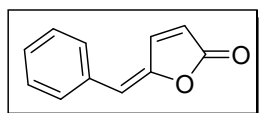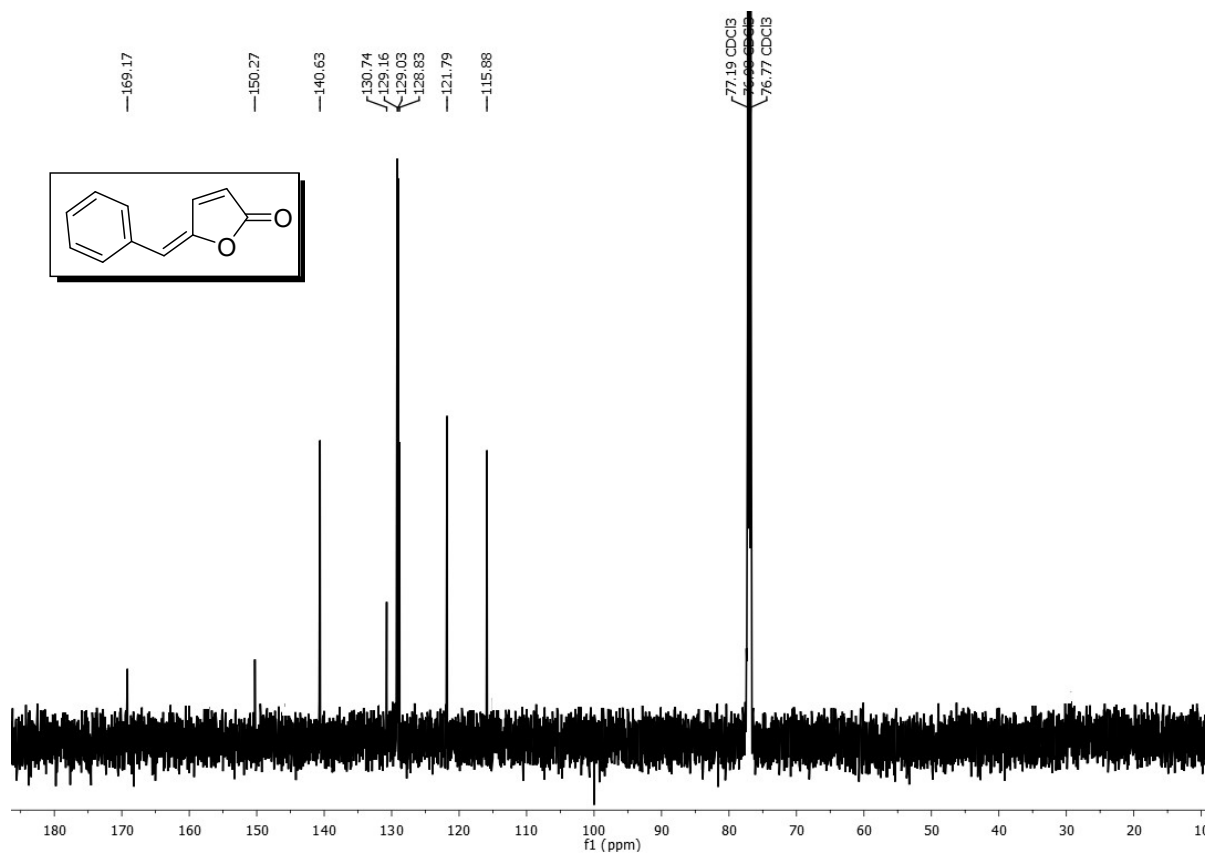



### $^1\text{H}$ NMR of compound 3c (600 MHz, $\text{CDCl}_3$ )

8.28  
8.27  
8.26  
8.25  
7.97  
7.96  
7.95  
7.94  
7.58  
7.57  
7.28  
6.38  
6.37  
6.11

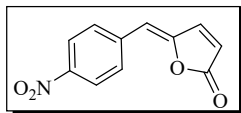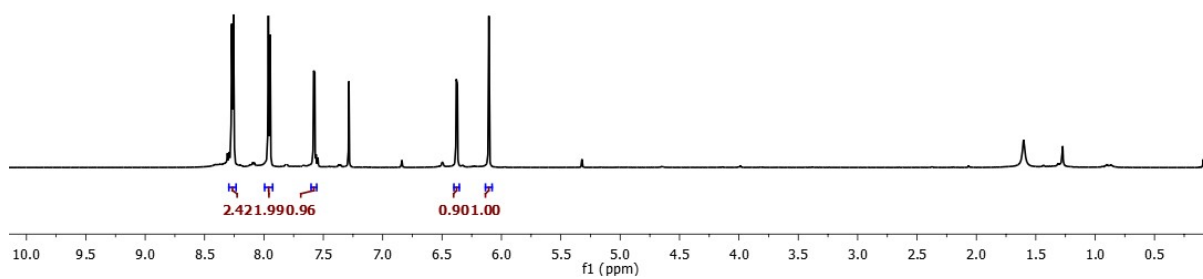

### $^{13}\text{C}$ NMR of compound 3c (150 MHz, $\text{CDCl}_3$ )

169.15  
150.64  
145.06  
139.03  
133.42  
131.08  
124.01  
120.17  
111.06

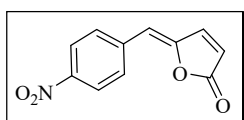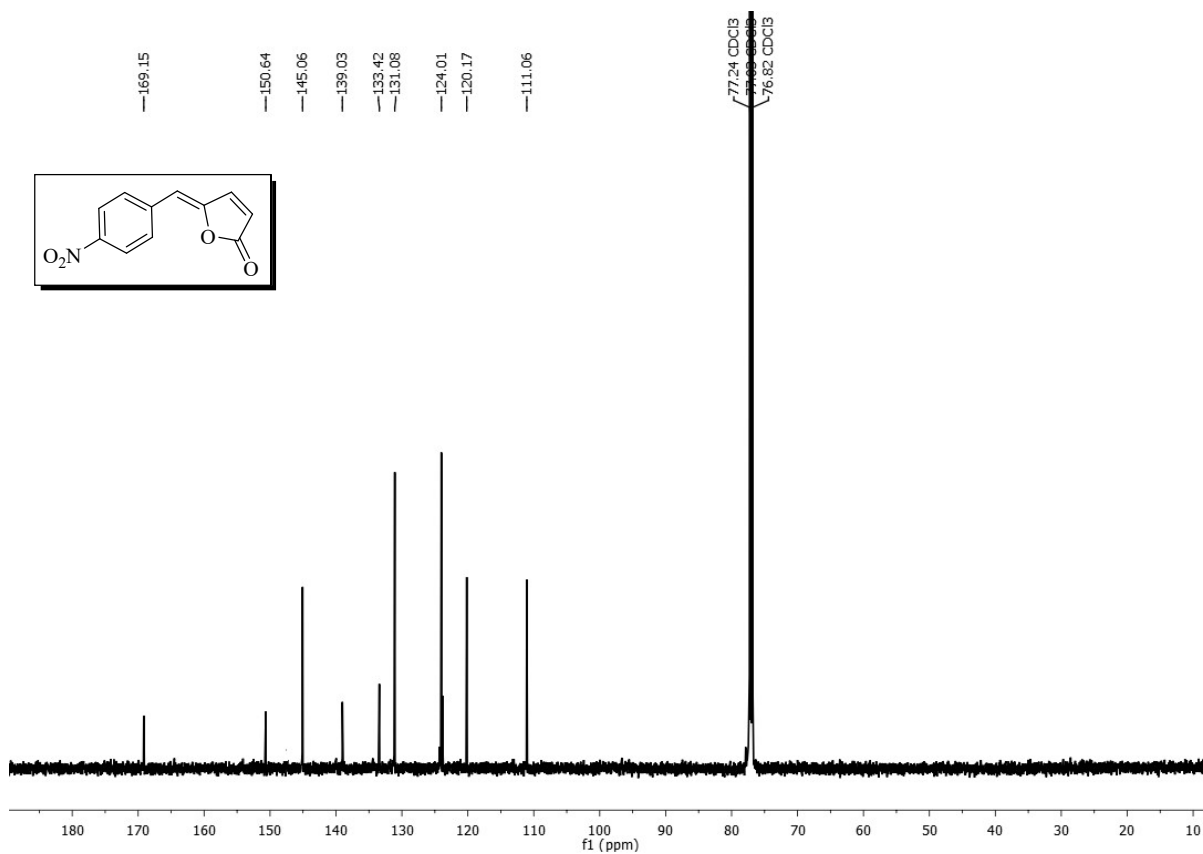

### <sup>1</sup>H NMR of compound 4c (600 MHz, CDCl<sub>3</sub>)

8.31  
8.30  
8.30  
7.81  
7.80  
7.56  
7.55  
7.28  
6.84  
6.84  
6.50  
6.49  
6.49

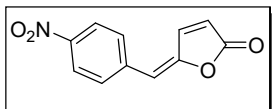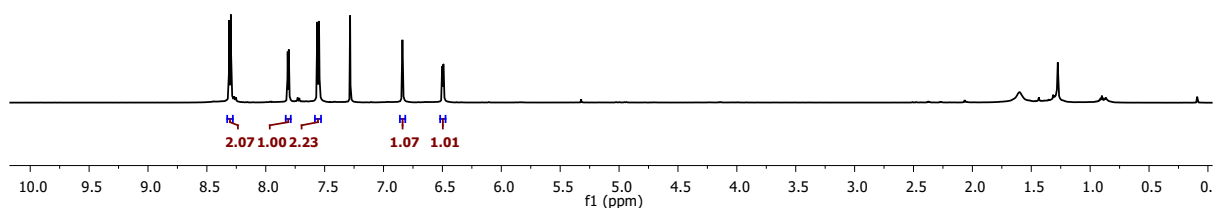

### <sup>13</sup>C NMR of compound 4c (150 MHz, CDCl<sub>3</sub>)

168.32  
152.03  
147.53  
139.94  
139.58  
129.78  
124.31  
123.68  
113.03

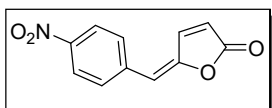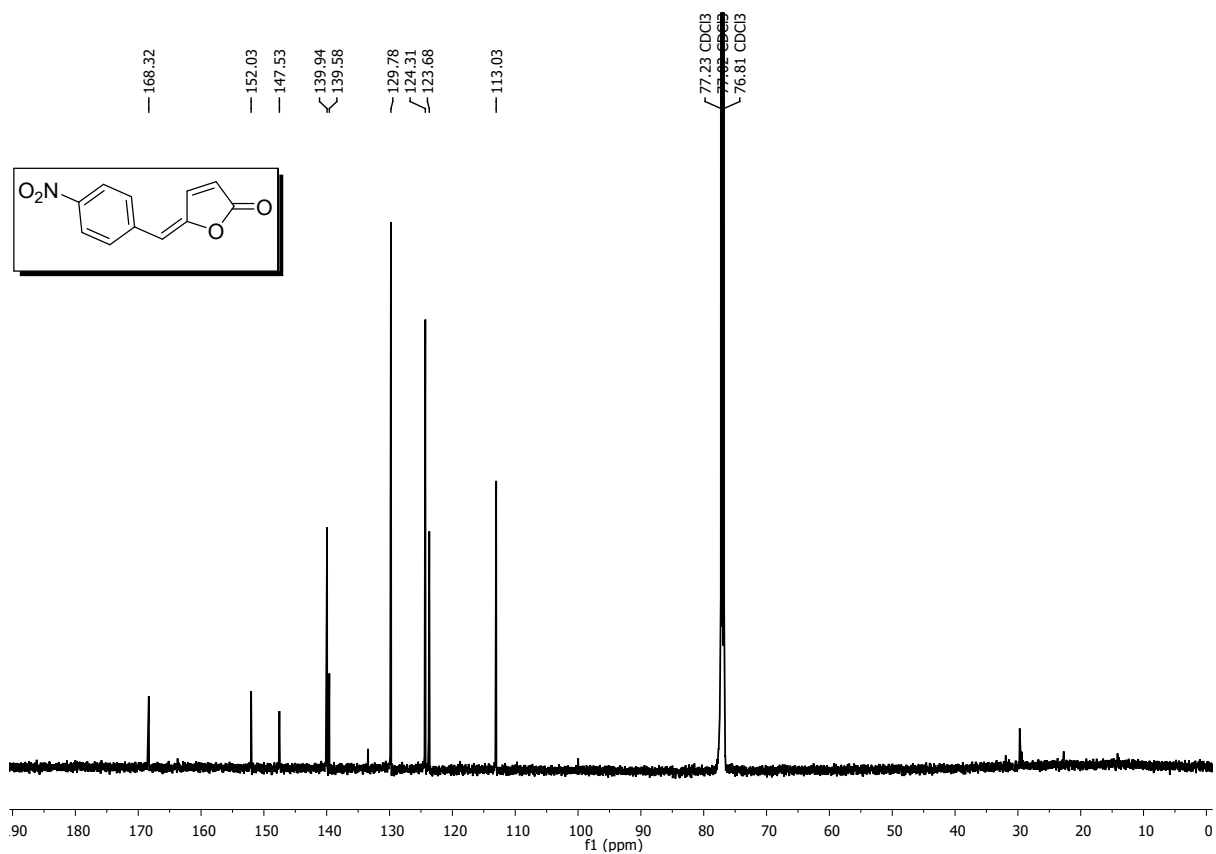

## 2D NOESY OF COMPOUND 3C:

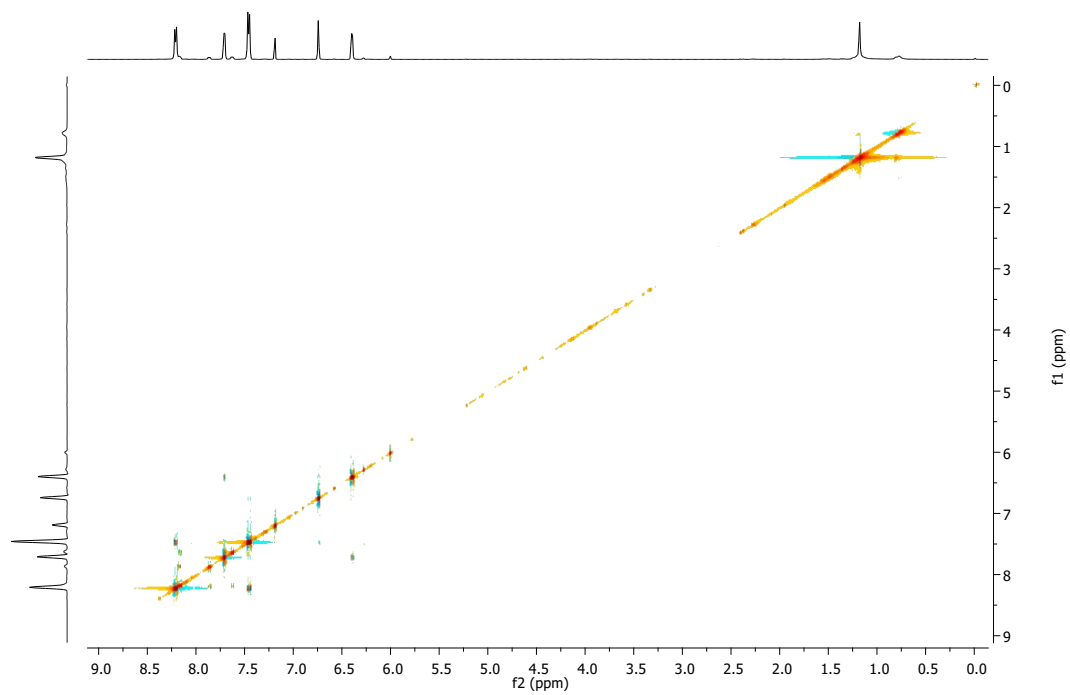

# <sup>1</sup>H NMR (400 MHz, CDCl<sub>3</sub>) of compound 3d

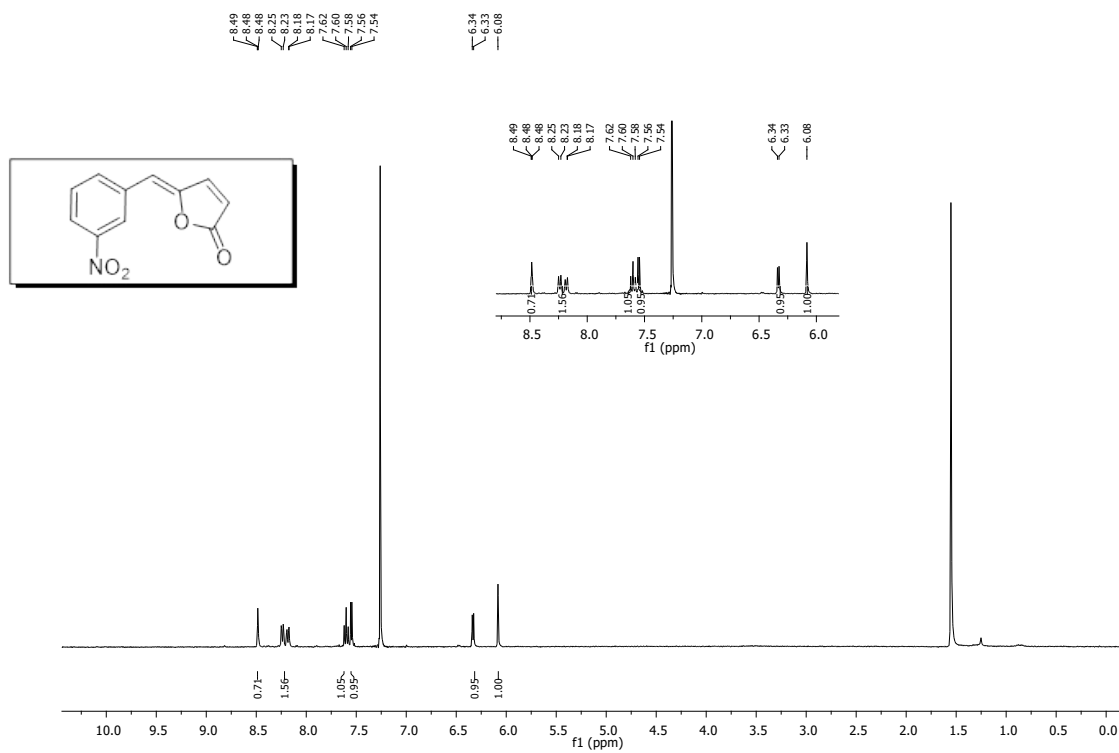

# <sup>13</sup>C NMR of compound 3d (125 MHz, CDCl<sub>3</sub>)

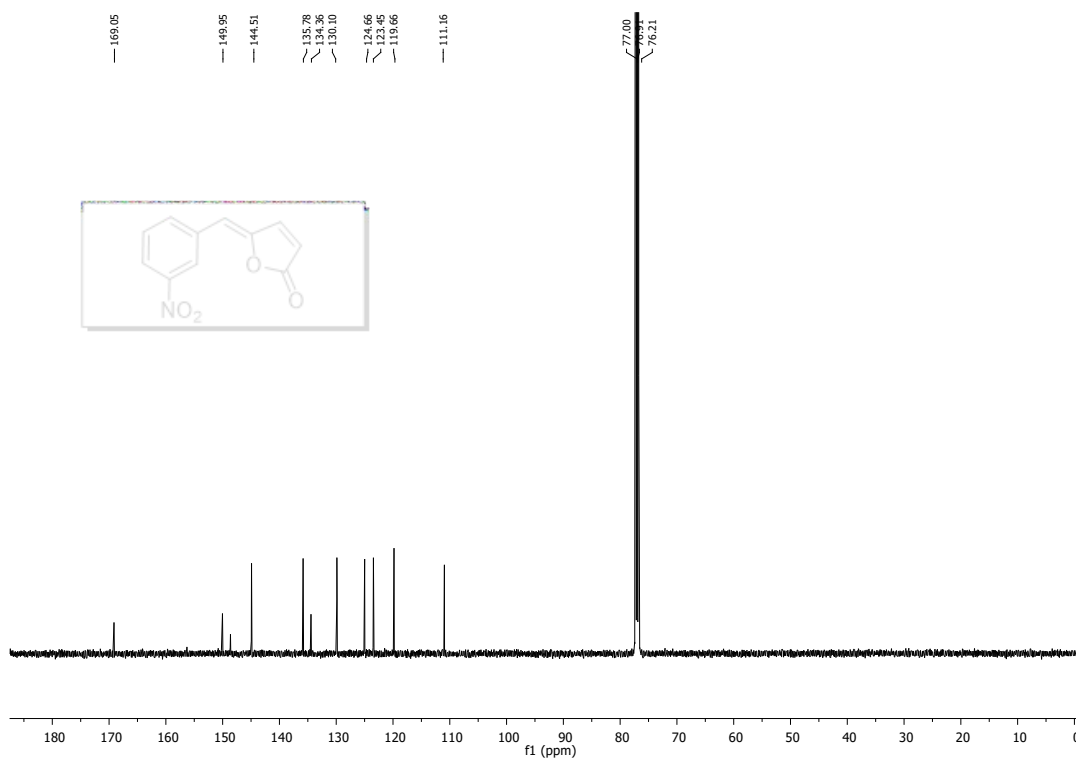

# <sup>1</sup>H NMR (500 MHz, CDCl<sub>3</sub>) of compound 4d

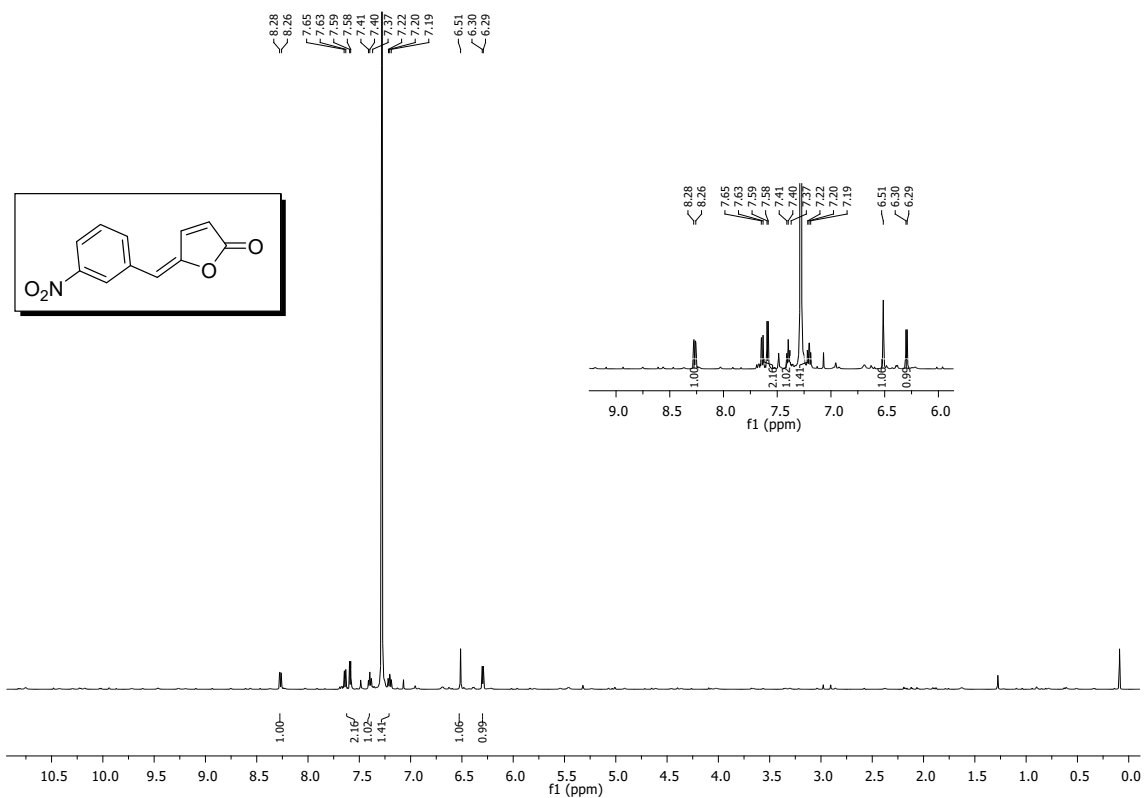

# <sup>13</sup>C NMR of compound 4d (125 MHz, CDCl<sub>3</sub>)

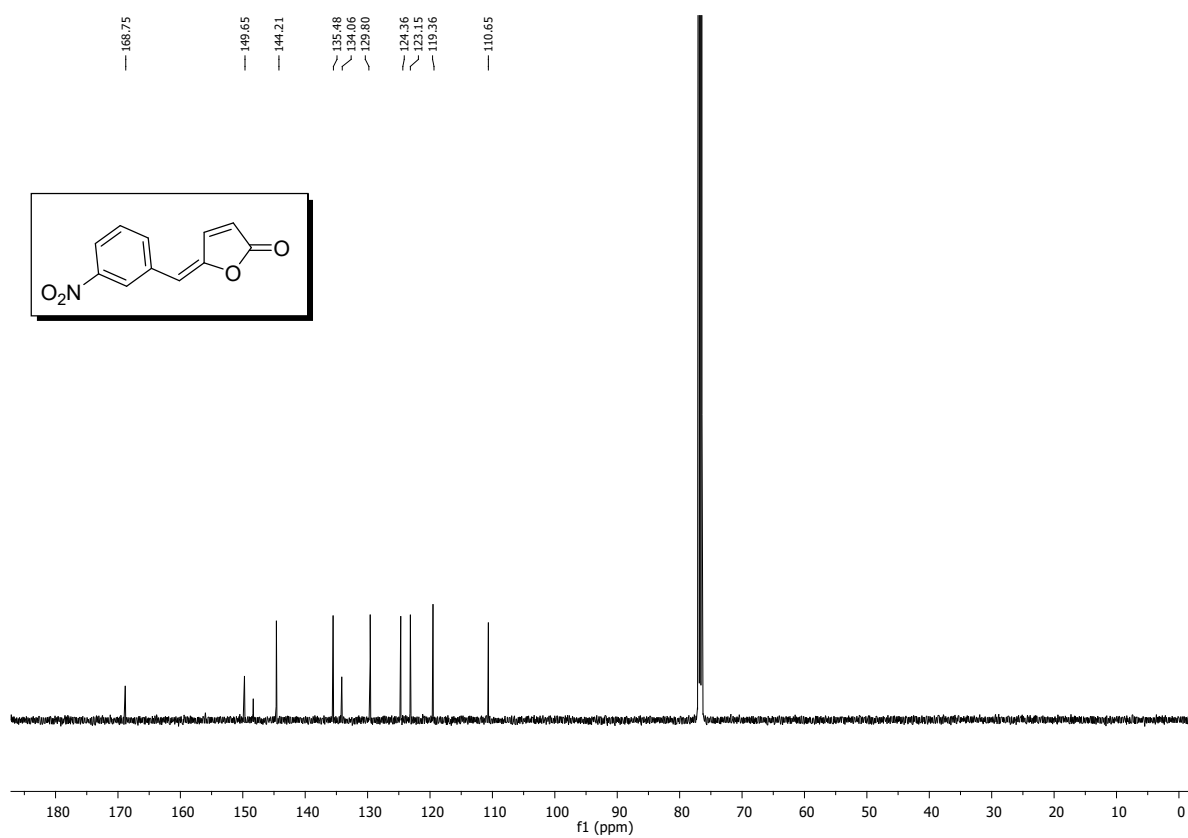

# <sup>1</sup>H NMR (500 MHz, CDCl<sub>3</sub>) of compound 3e

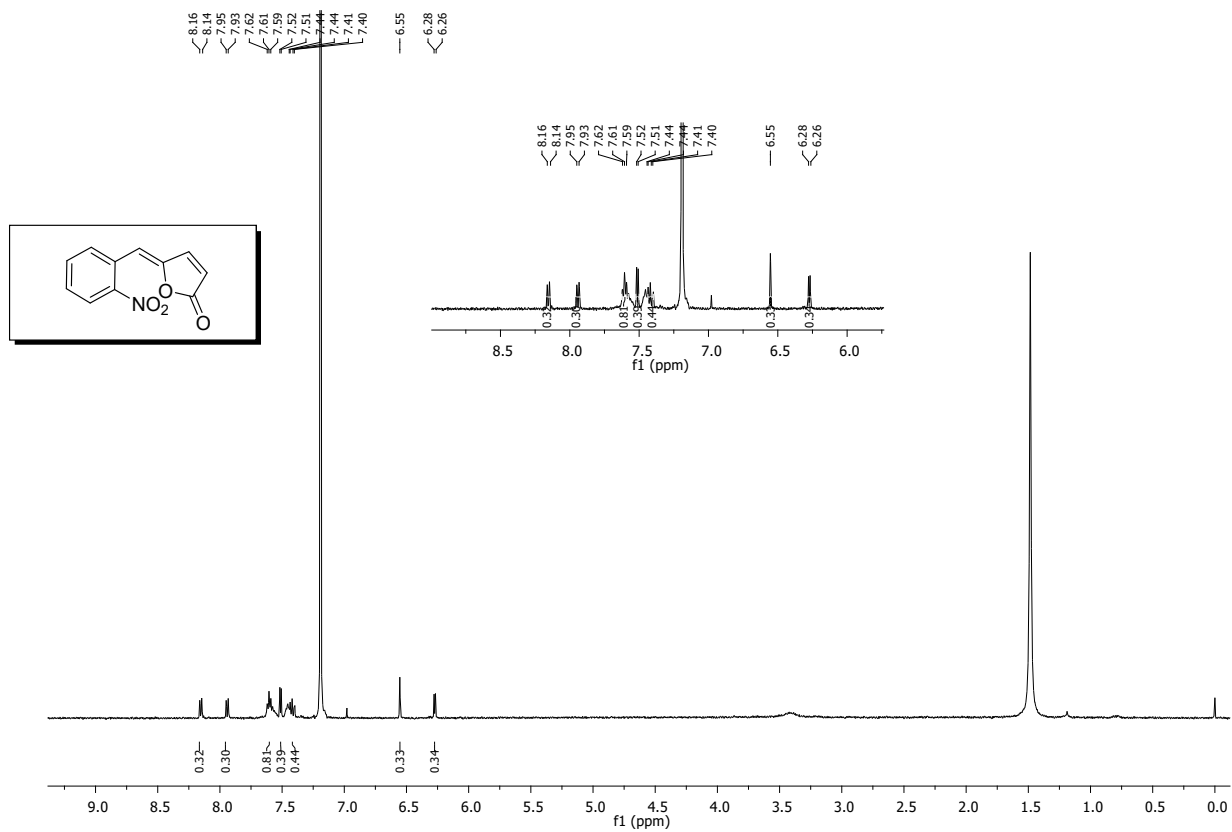



# <sup>13</sup>C NMR of compound 3e (125 MHz, CDCl<sub>3</sub>)

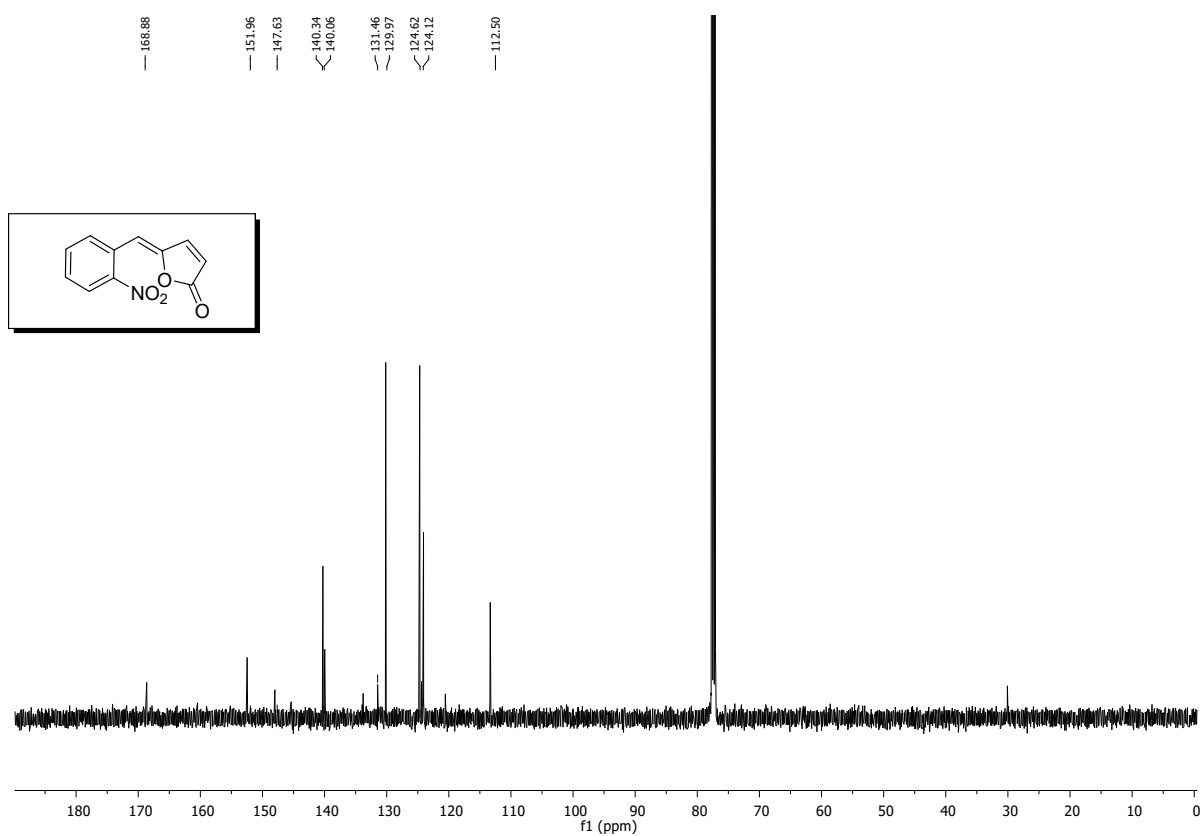

# <sup>1</sup>H NMR (500 MHz, CDCl<sub>3</sub>) of compound 4e

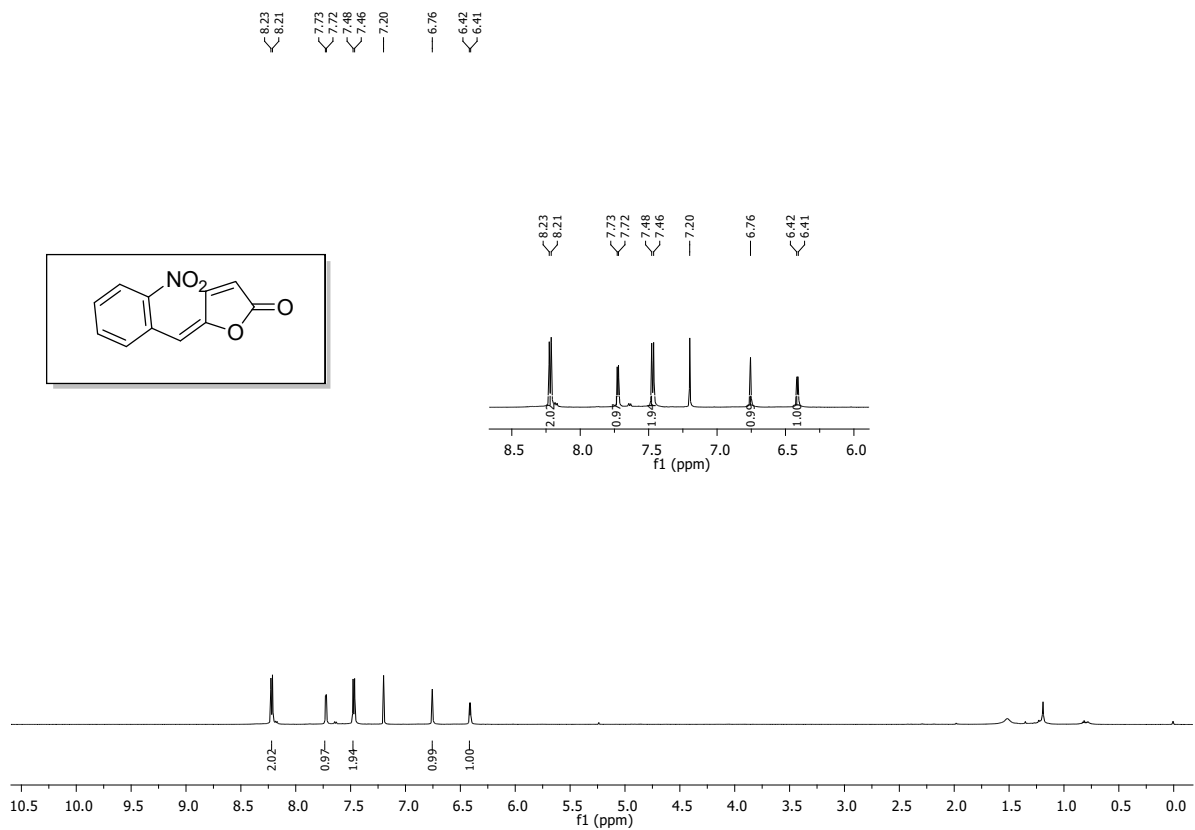

# <sup>13</sup>C NMR of compound 4e (100 MHz, CDCl<sub>3</sub>)

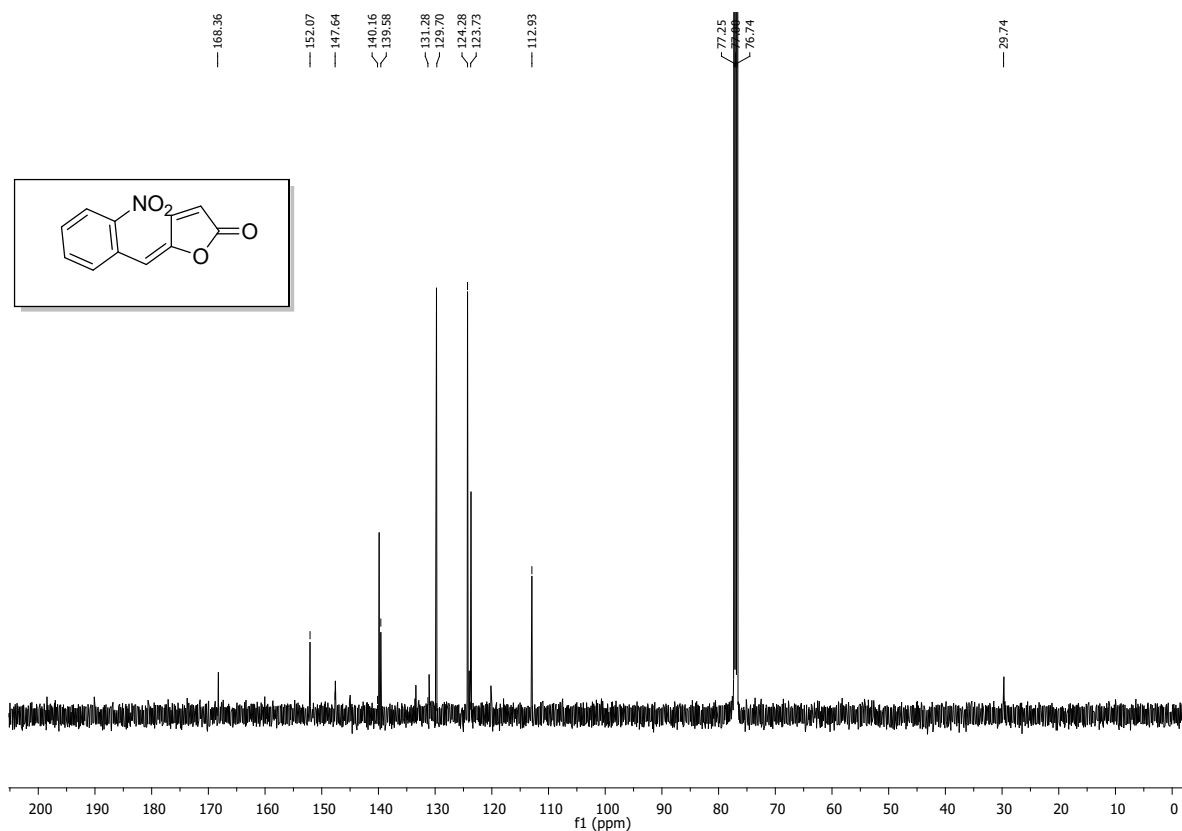

# $^1\text{H}$ NMR (600 MHz, $\text{CDCl}_3$ ) of compound 3f

7.62  
7.61  
7.41  
7.40  
7.14  
7.13

6.12  
6.11  
5.93

2.30

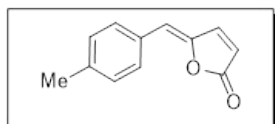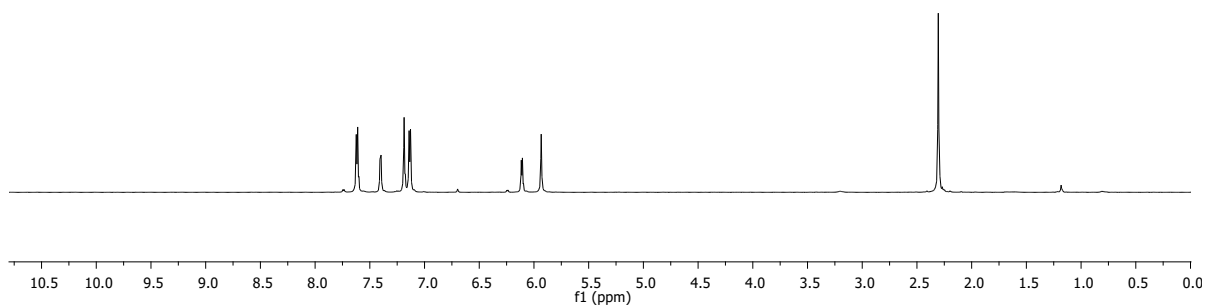

# <sup>13</sup>C NMR of compound 3f (150 MHz, CDCl<sub>3</sub>)

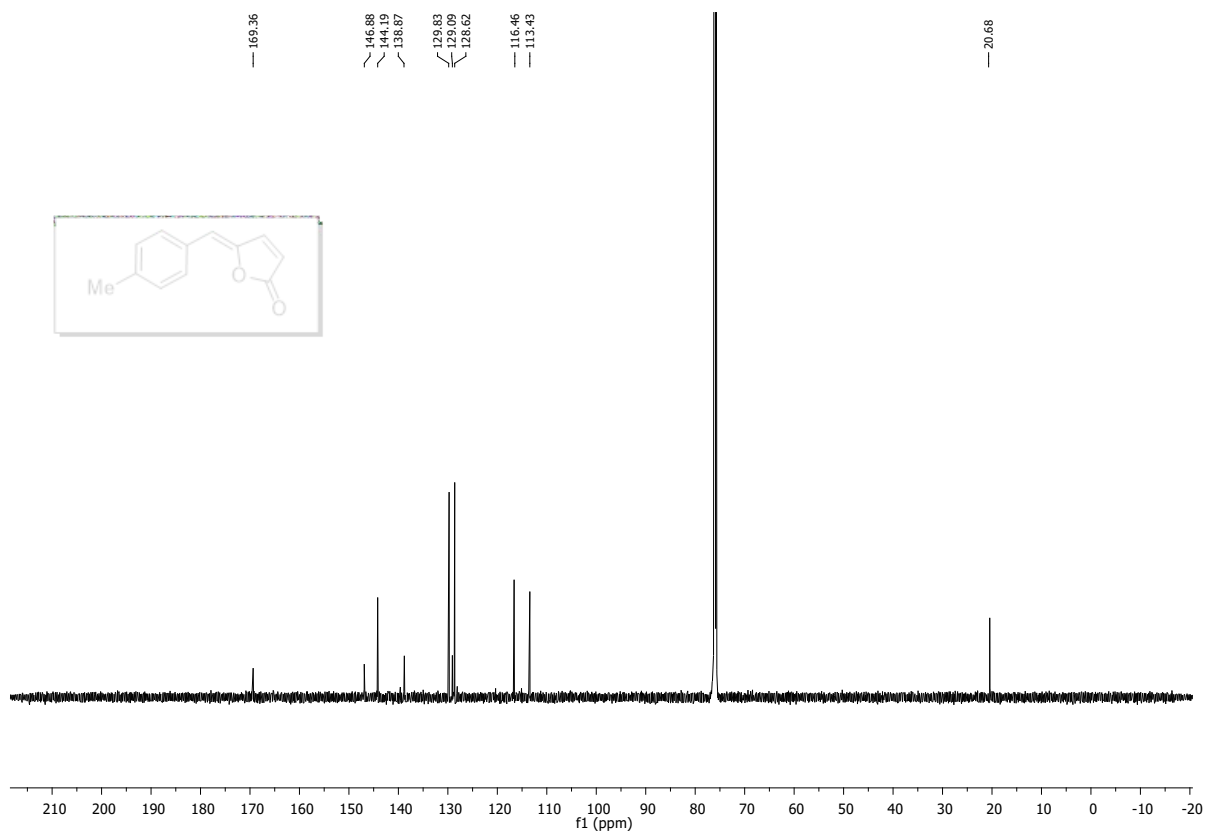

# $^1\text{H}$ NMR (400 MHz, $\text{CDCl}_3$ ) of compound 4f

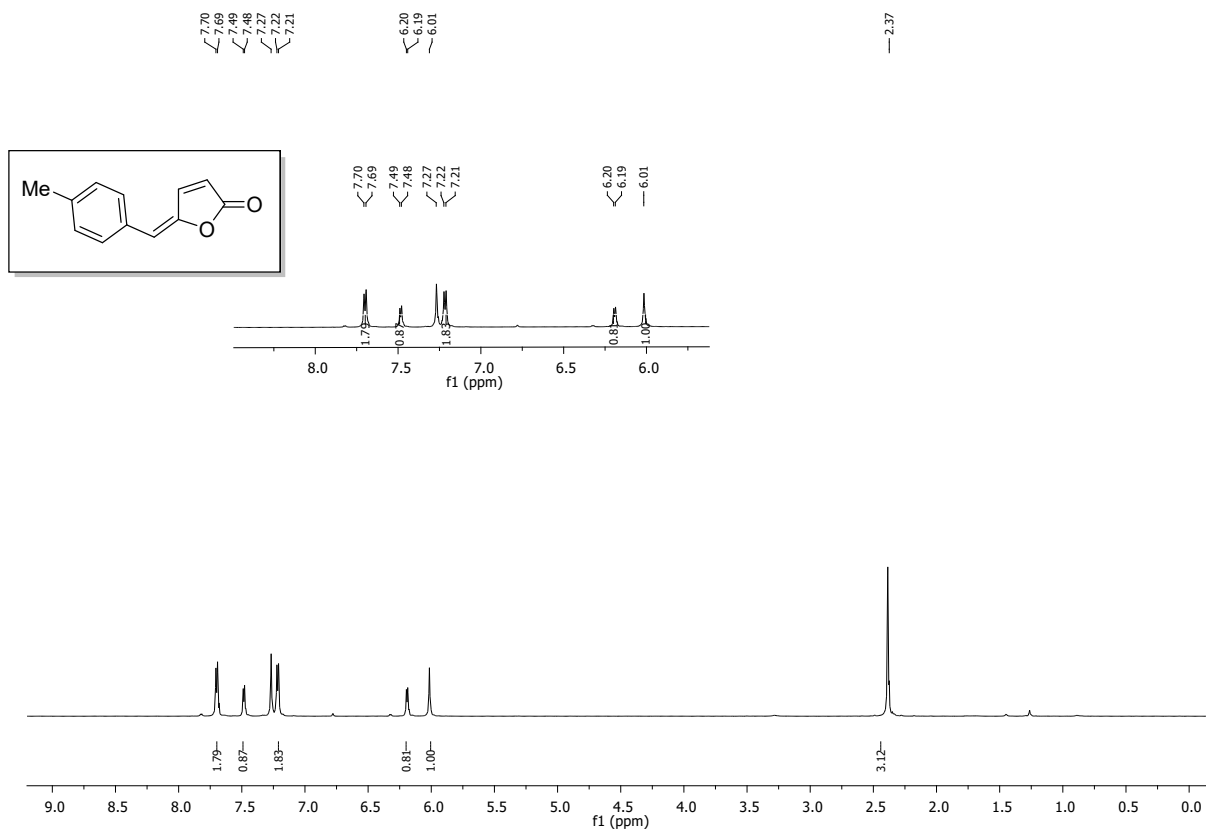

# $^{13}\text{C}$ NMR of compound 4f (100 MHz, $\text{CDCl}_3$ )

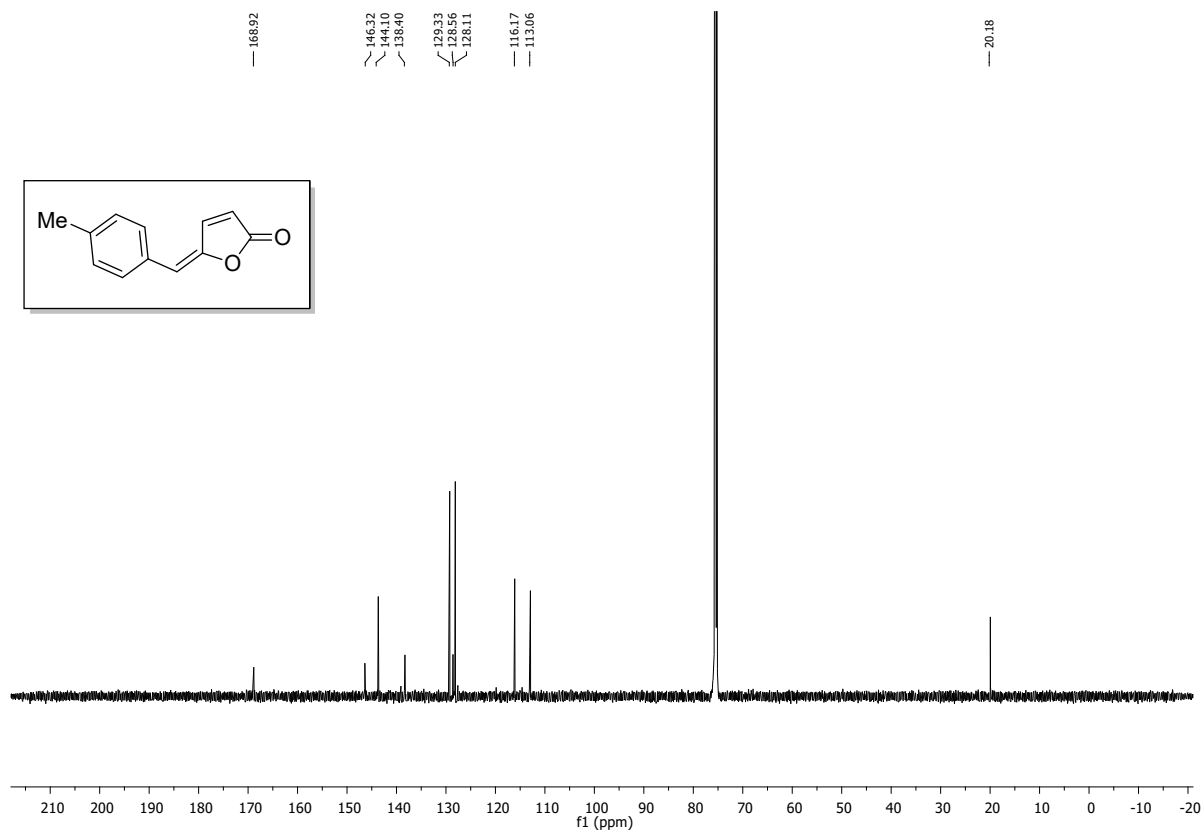

# $^1\text{H}$ NMR (600 MHz, $\text{CDCl}_3$ ) of compound 3g

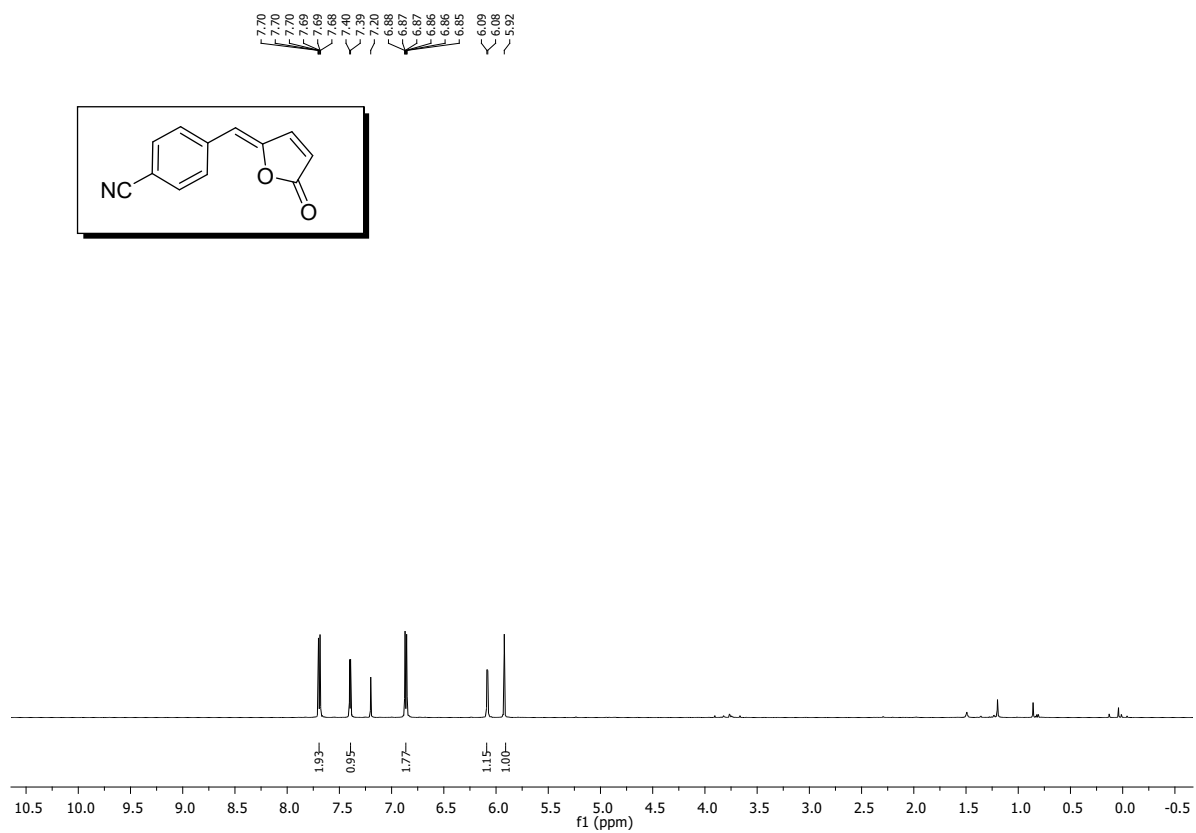



# <sup>13</sup>C NMR of compound 3g (125 MHz, CDCl<sub>3</sub>)

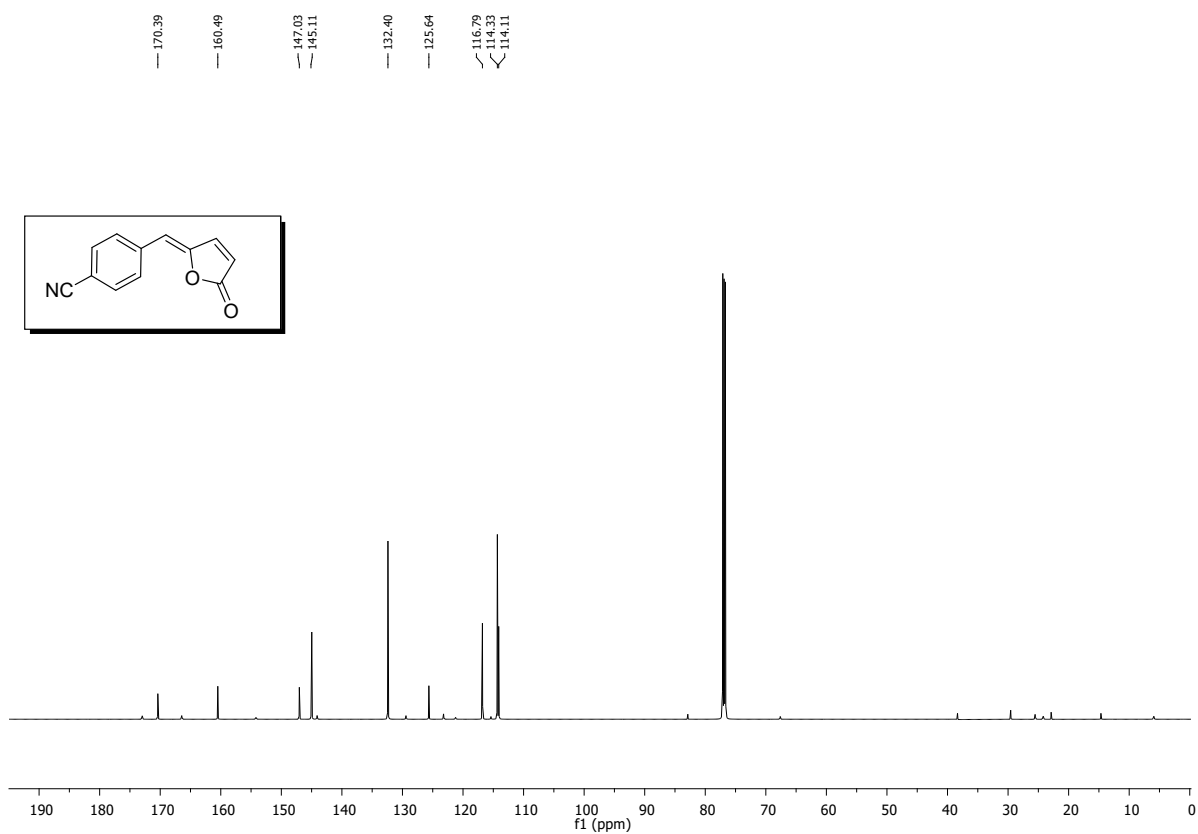

# $^1\text{H}$ NMR (600 MHz, $\text{CDCl}_3$ ) of compound 4g

7.74  
7.74  
7.26  
7.25  
6.88  
6.87  
6.68  
6.24  
6.23

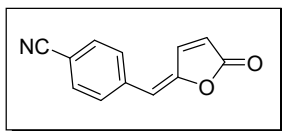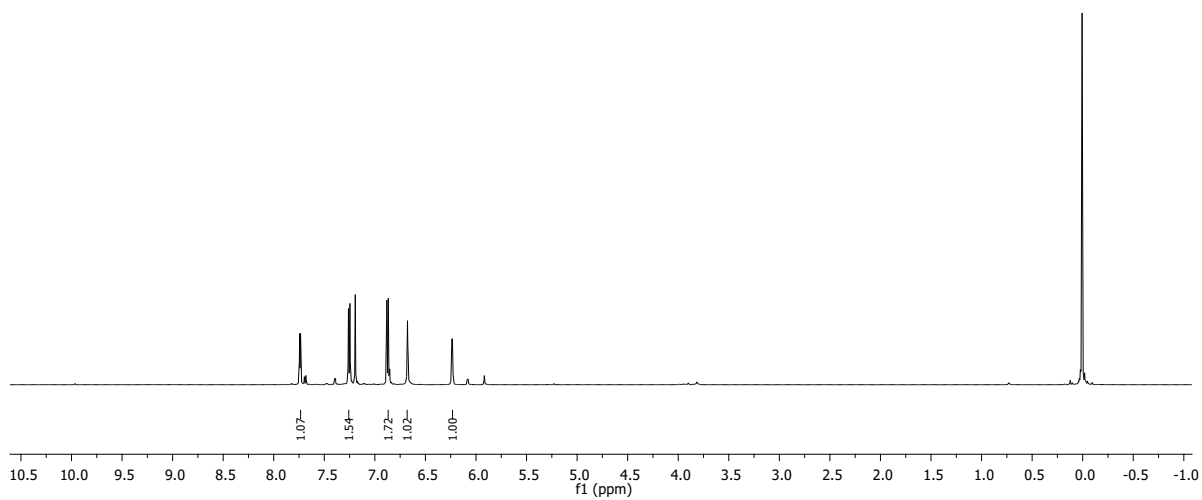

# <sup>13</sup>C NMR of compound 4g (125 MHz, CDCl<sub>3</sub>)

— 169.94  
— 160.04  
— 146.57  
— 144.65  
— 131.94  
— 125.18  
— 116.34  
— 113.87  
— 113.65

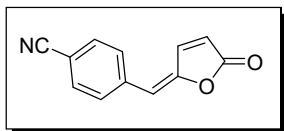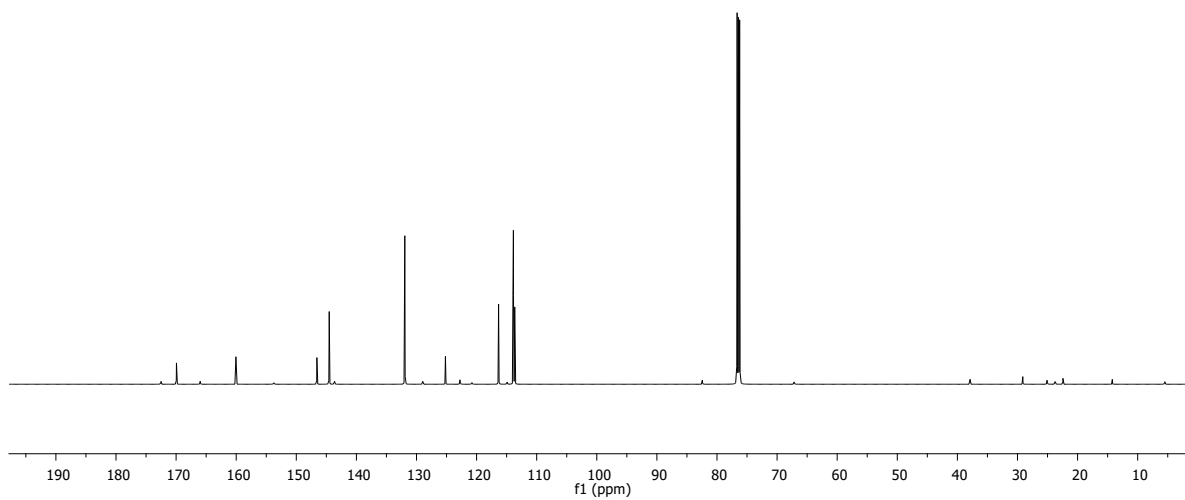

# <sup>1</sup>H NMR (600 MHz, CDCl<sub>3</sub>) of compound 3h

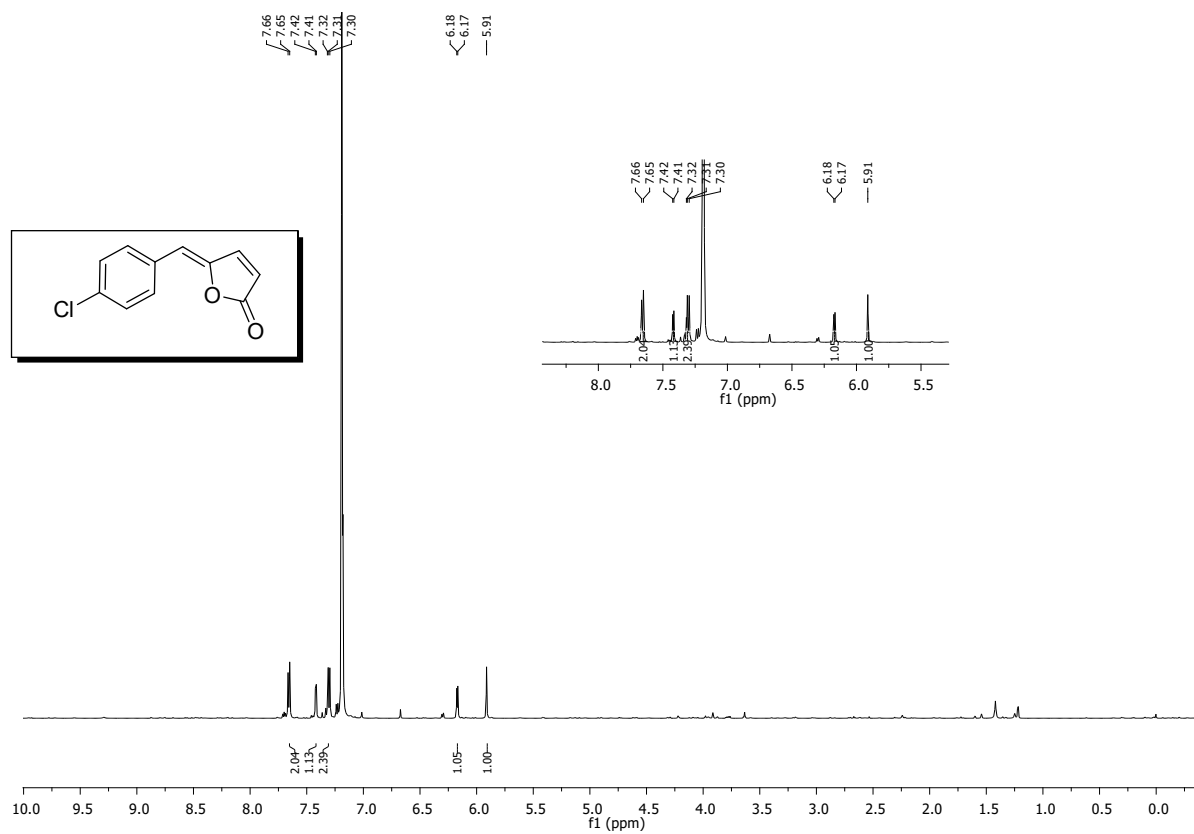

# <sup>13</sup>C NMR of compound 3h (150 MHz, CDCl<sub>3</sub>)

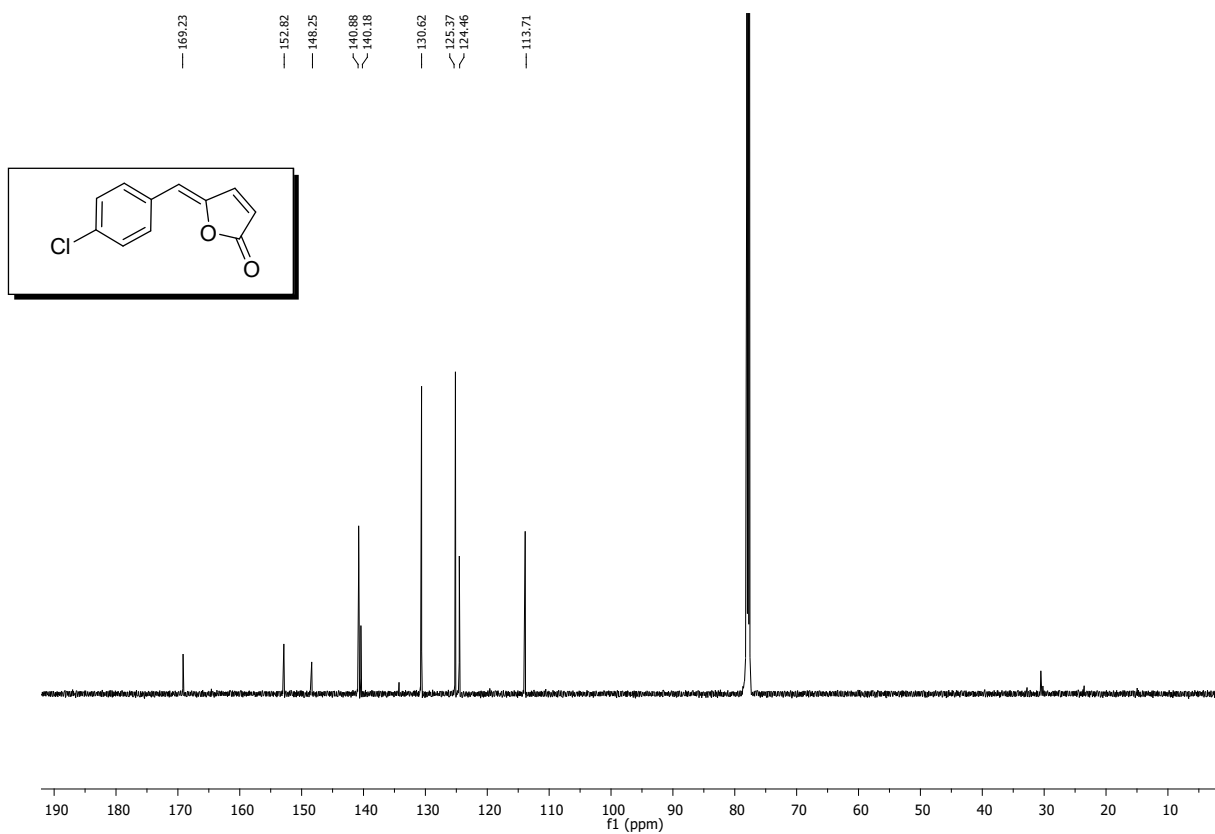

**<sup>1</sup>H NMR (500 MHz, CDCl<sub>3</sub>) of compound 4h**

7.82  
7.81  
7.52  
7.51  
7.44  
7.43  
7.41  
6.24  
6.23  
6.05

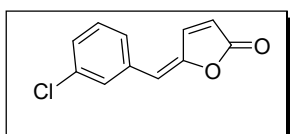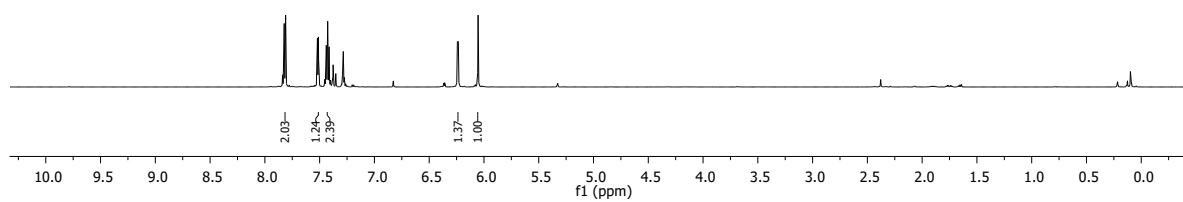

**$^{13}\text{C}$  NMR of compound 4h (125 MHz,  $\text{CDCl}_3$ )**

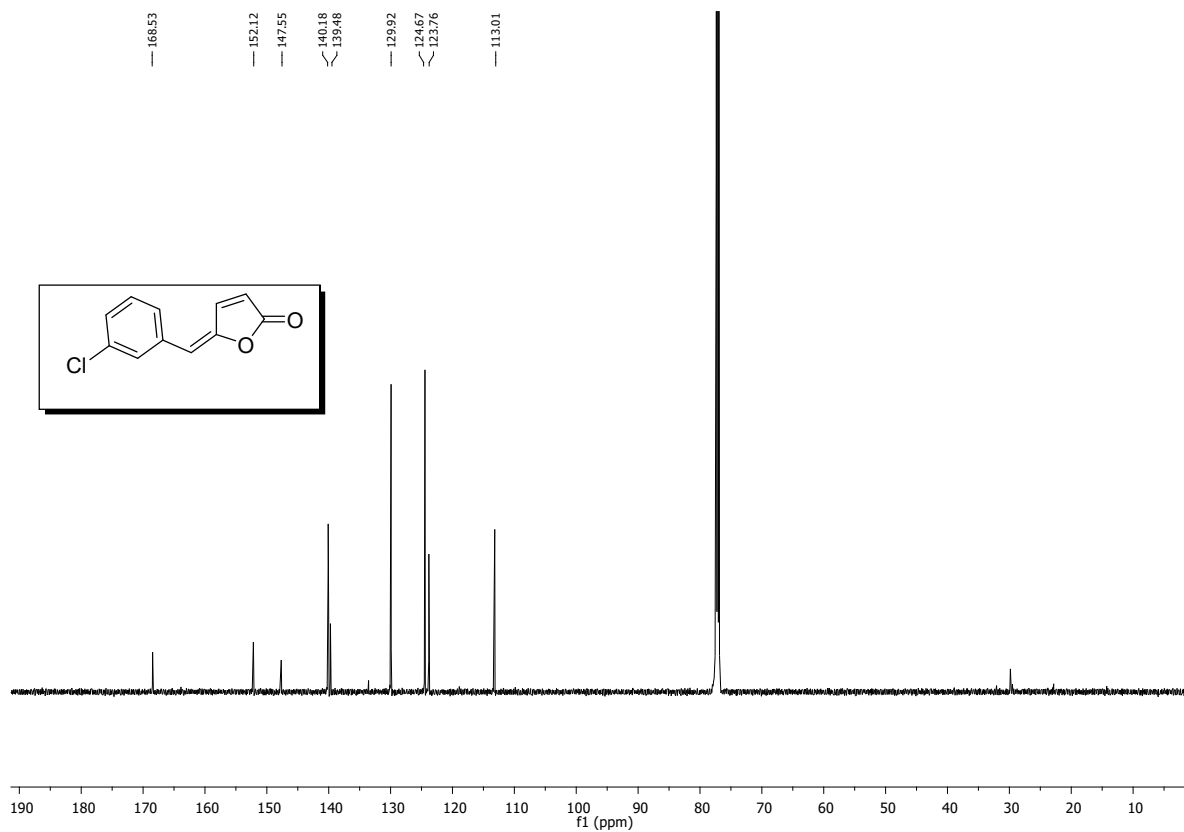

# <sup>1</sup>H NMR (500 MHz, CDCl<sub>3</sub>) of compound 3i

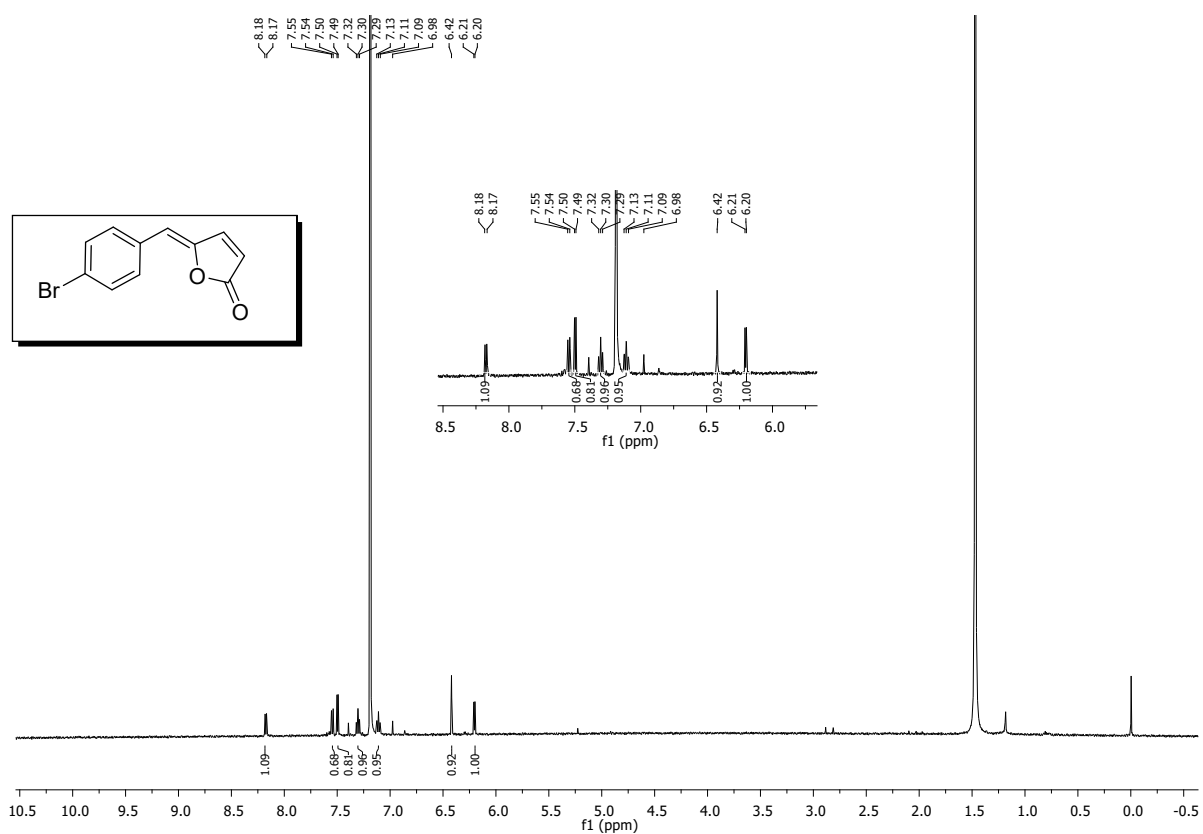



# $^{13}\text{C}$ NMR of compound 3i (125 MHz, $\text{CDCl}_3$ )

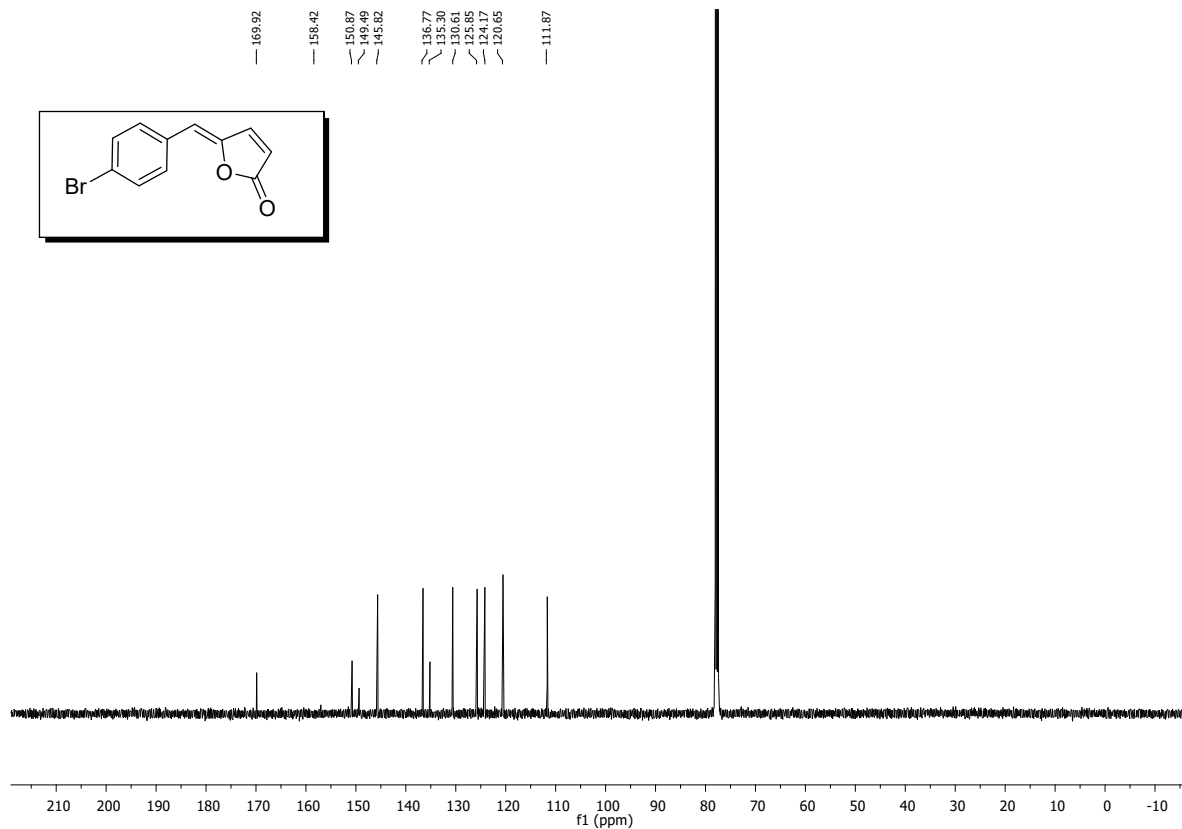

# <sup>1</sup>H NMR (400 MHz, CDCl<sub>3</sub>) of compound 4i

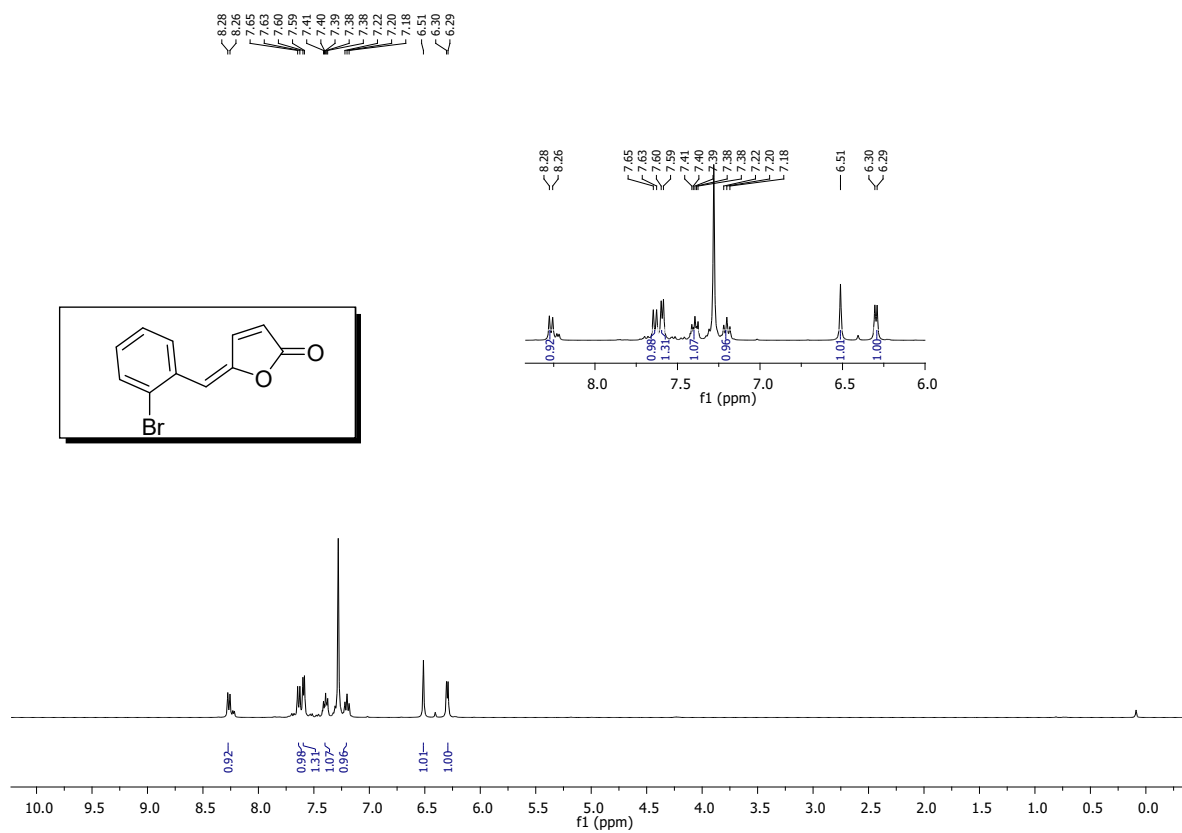

# <sup>13</sup>C NMR of compound 4i (125 MHz, CDCl<sub>3</sub>)

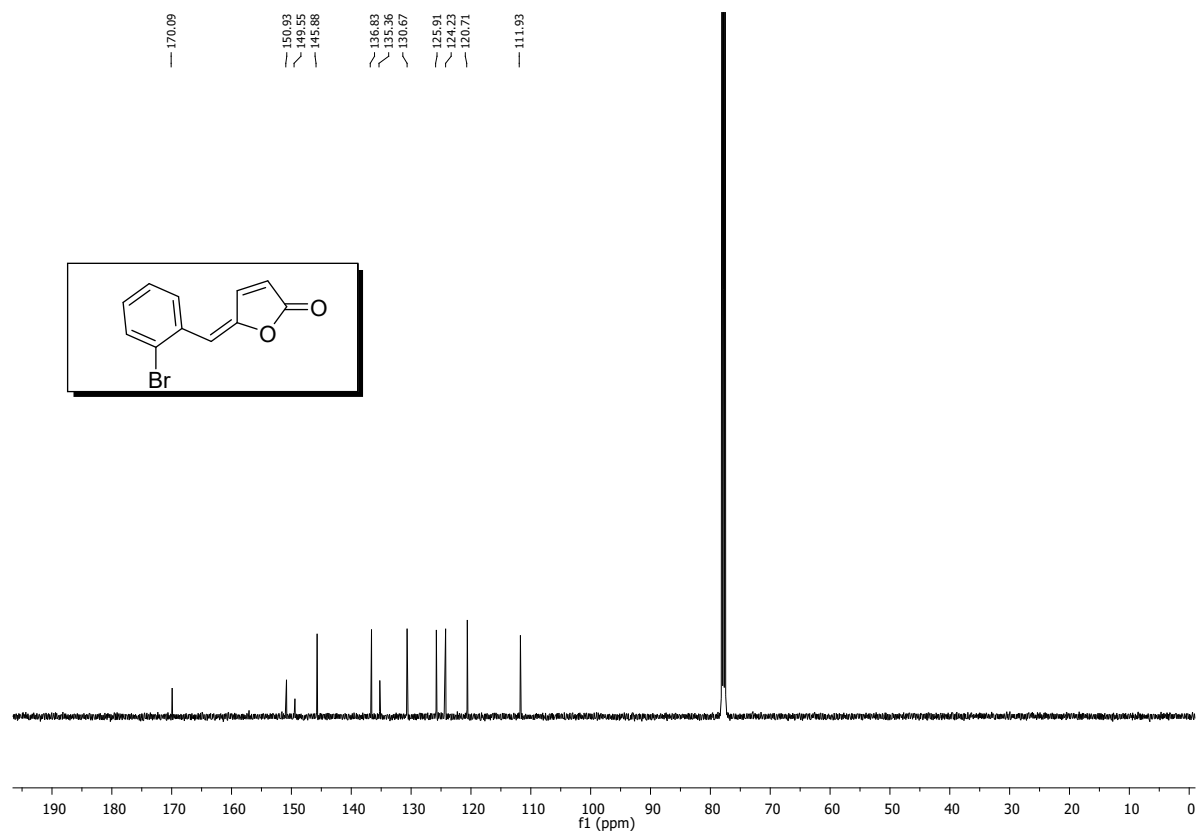

**<sup>1</sup>H NMR (500 MHz, CDCl<sub>3</sub>) of compound 3j**

7.81  
7.79  
7.58  
7.57  
7.55  
7.45  
7.44  
7.41  
7.39  
7.37  
7.32  
7.30  
7.29  
6.16  
6.15  
6.01

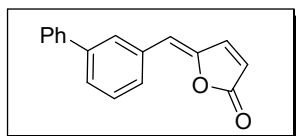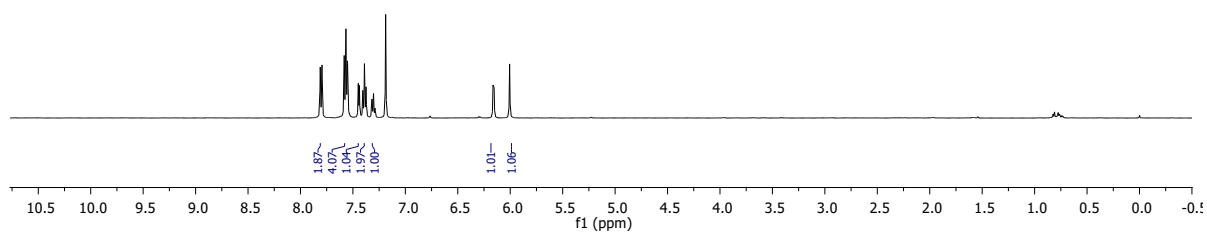

# $^{13}\text{C}$ NMR of compound 3j (125 MHz, $\text{CDCl}_3$ )

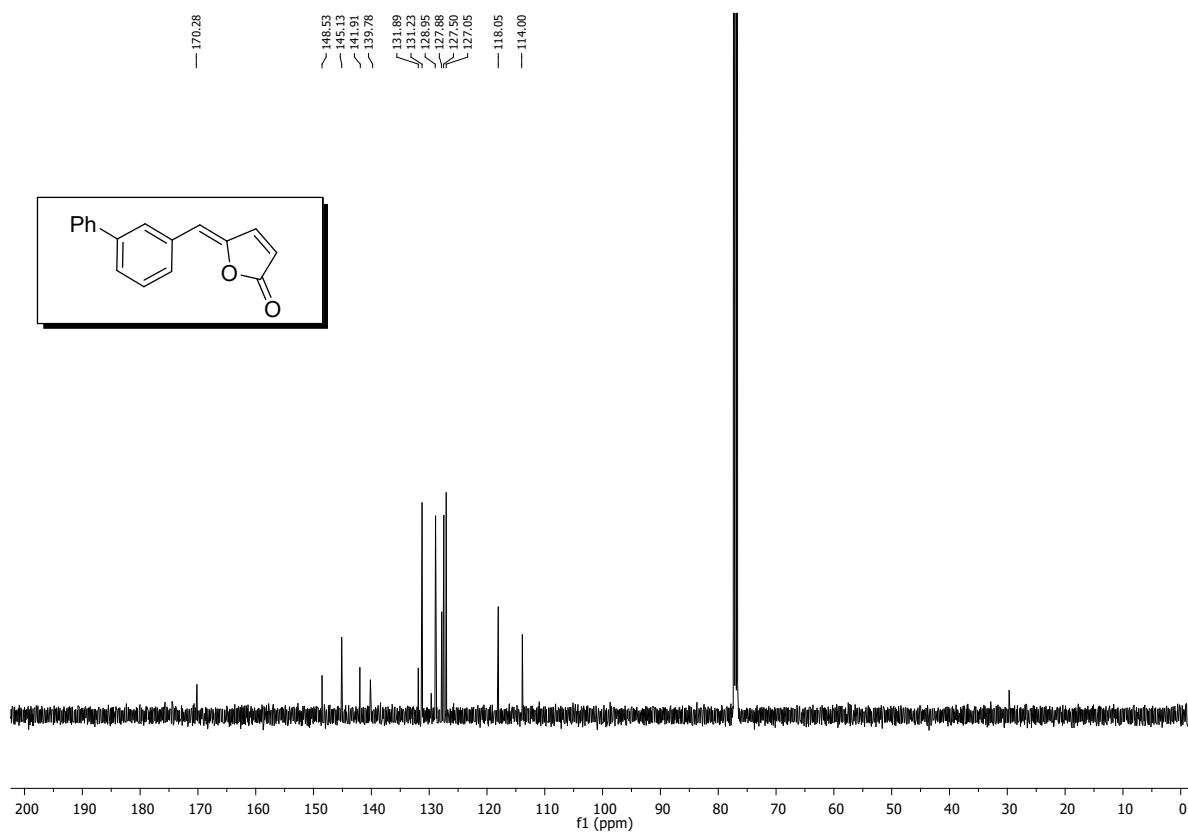

# <sup>1</sup>H NMR (400 MHz, CDCl<sub>3</sub>) of compound 4j

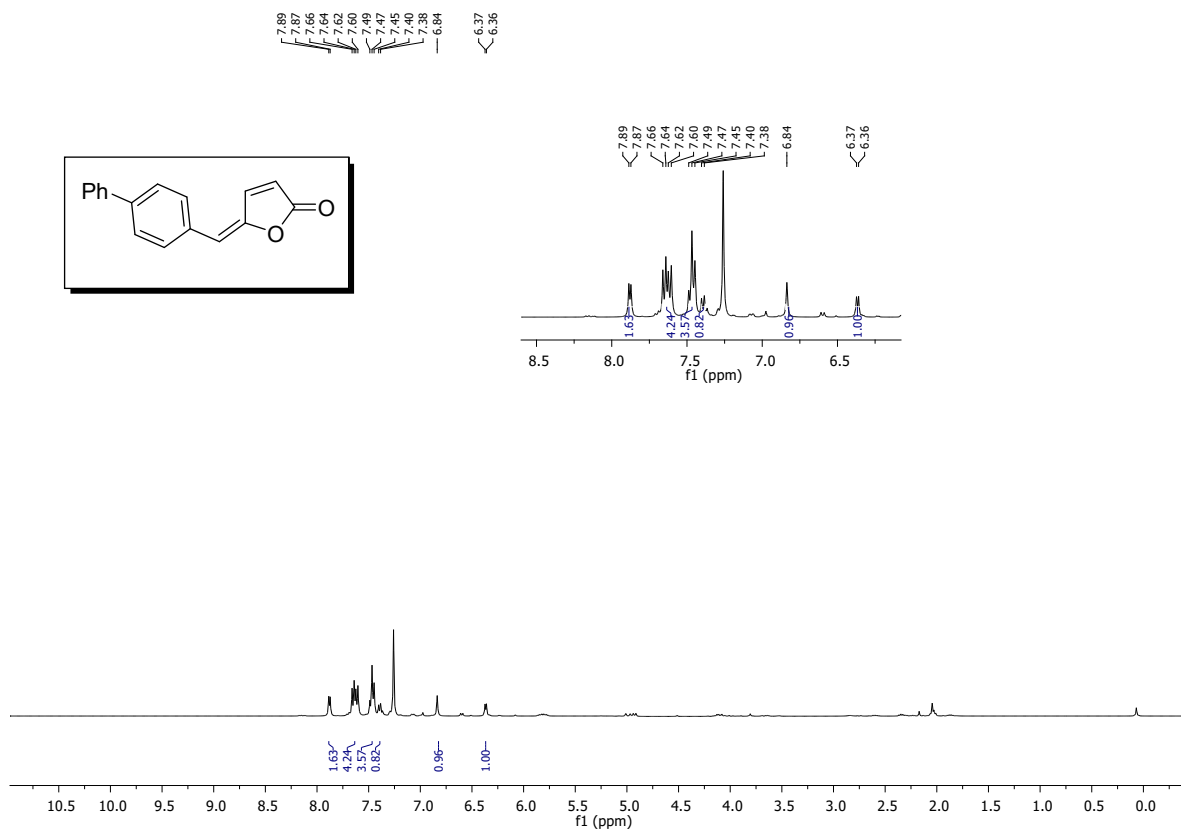

# <sup>13</sup>C NMR of compound 4j (100 MHz, CDCl<sub>3</sub>)

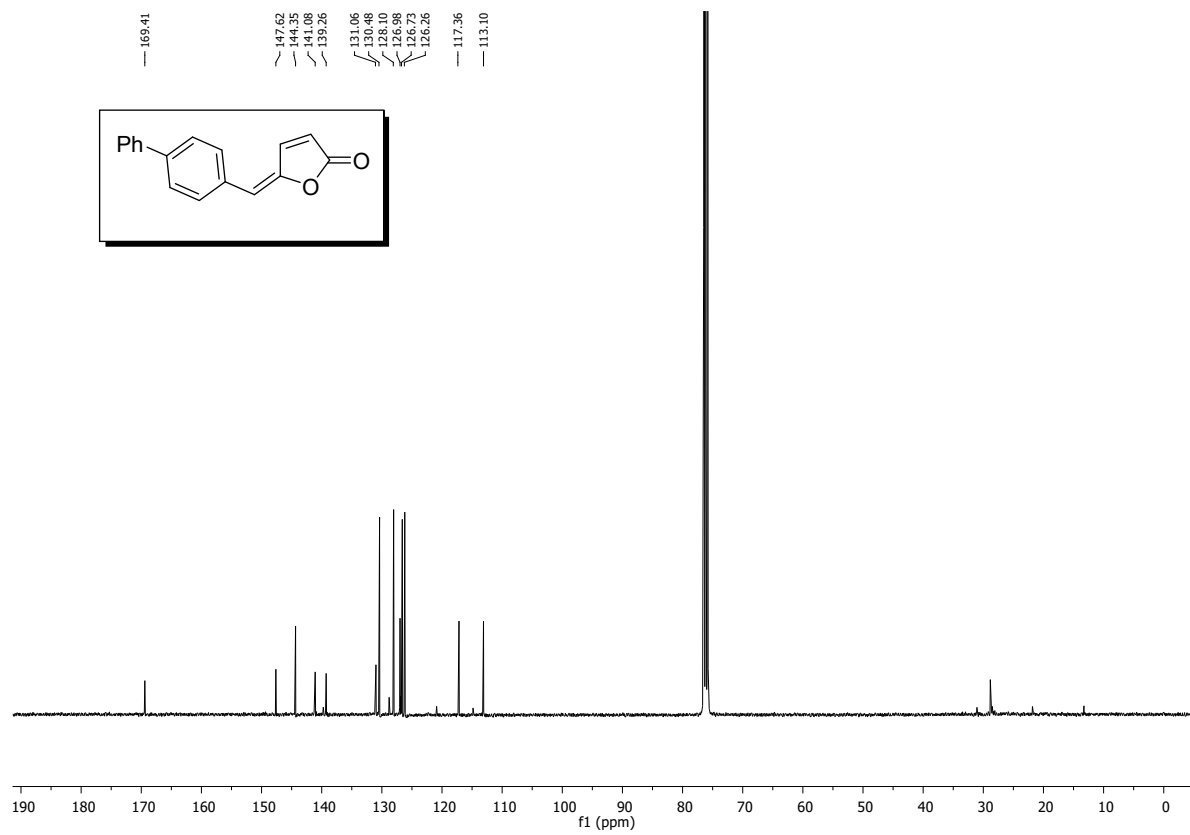

## 2D NOESY OF COMPOUND 3j:

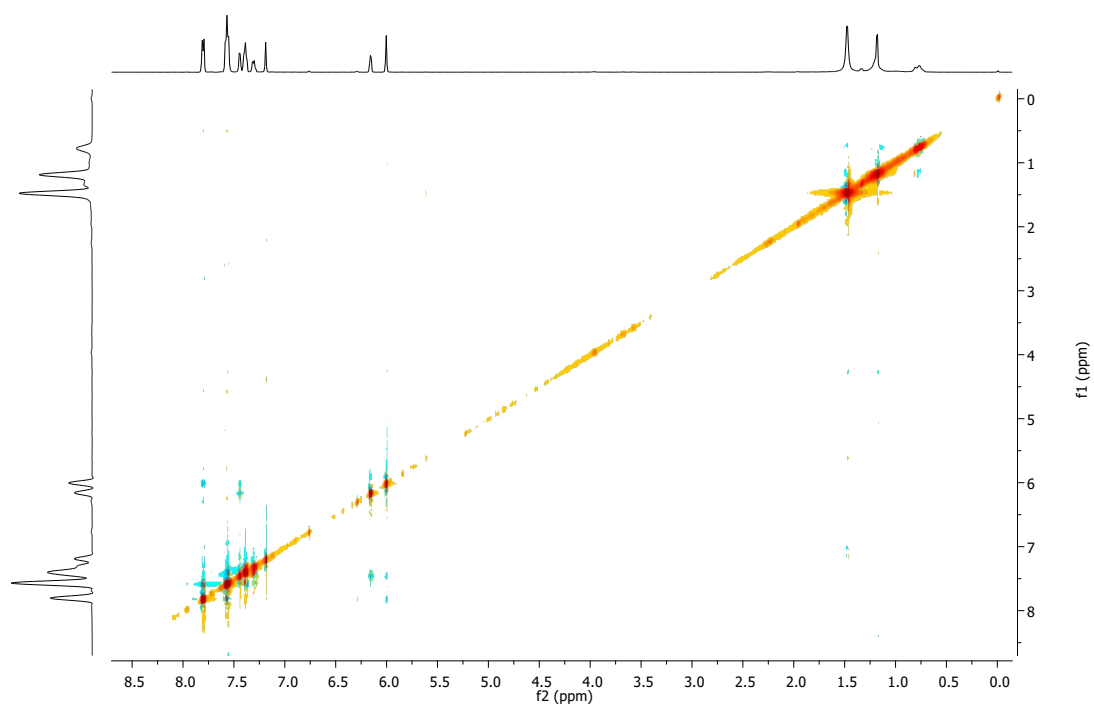



### $^1\text{H}$ NMR of compound 3k (400 MHz, $\text{CDCl}_3$ )

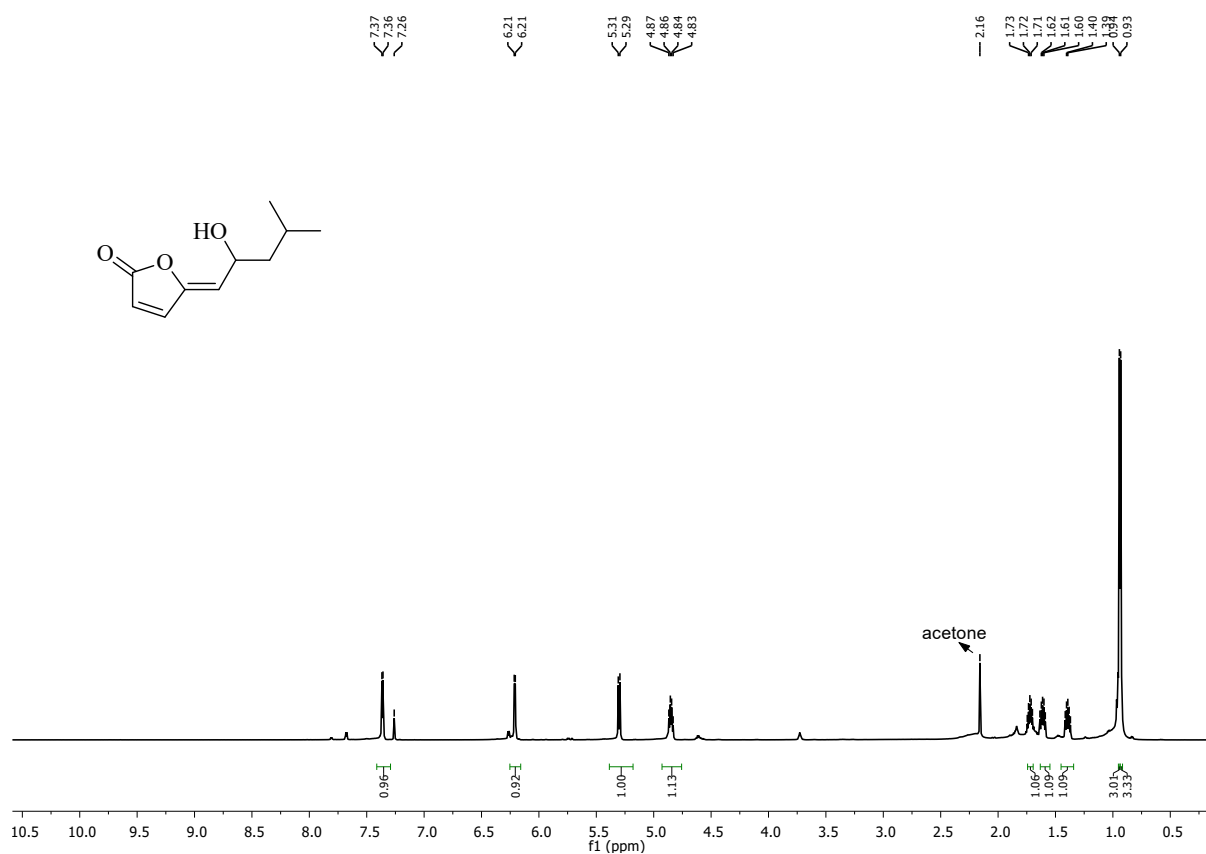

### $^{13}\text{C}$ NMR of compound 3k (100 MHz, $\text{CDCl}_3$ )

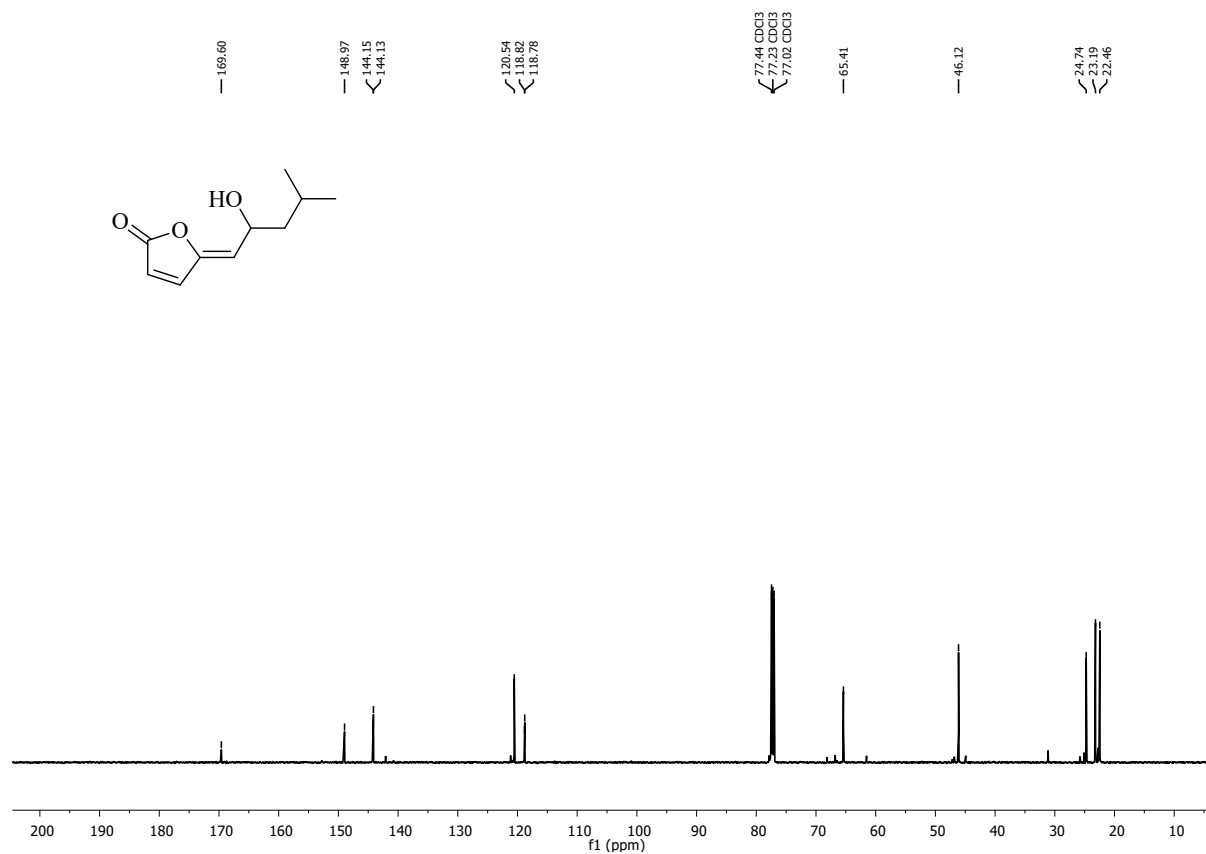

### DEPT NMR of compound 3k (100 MHz, CDCl<sub>3</sub>)

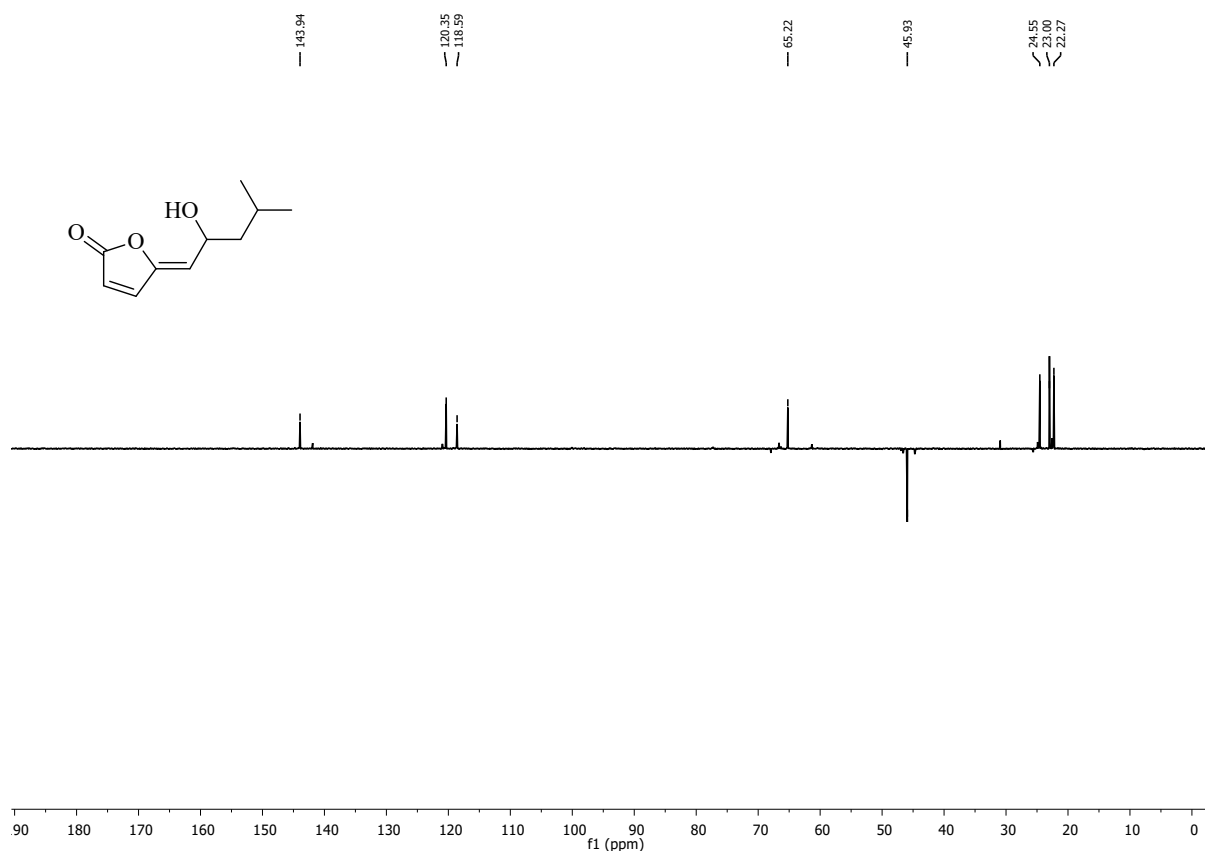

### <sup>1</sup>H NMR of compound 4k (400 MHz, CDCl<sub>3</sub>)

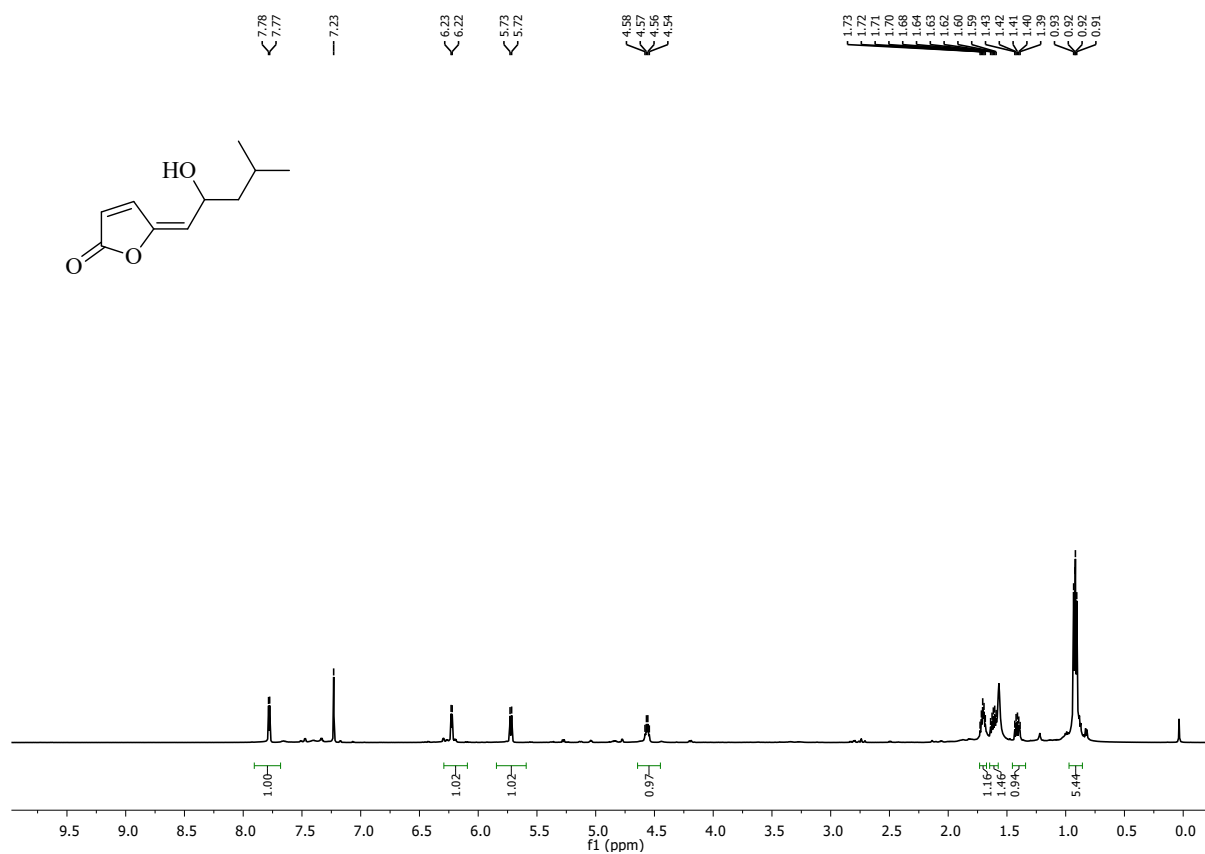

### <sup>13</sup>C NMR of compound 4k (100 MHz, CDCl<sub>3</sub>)

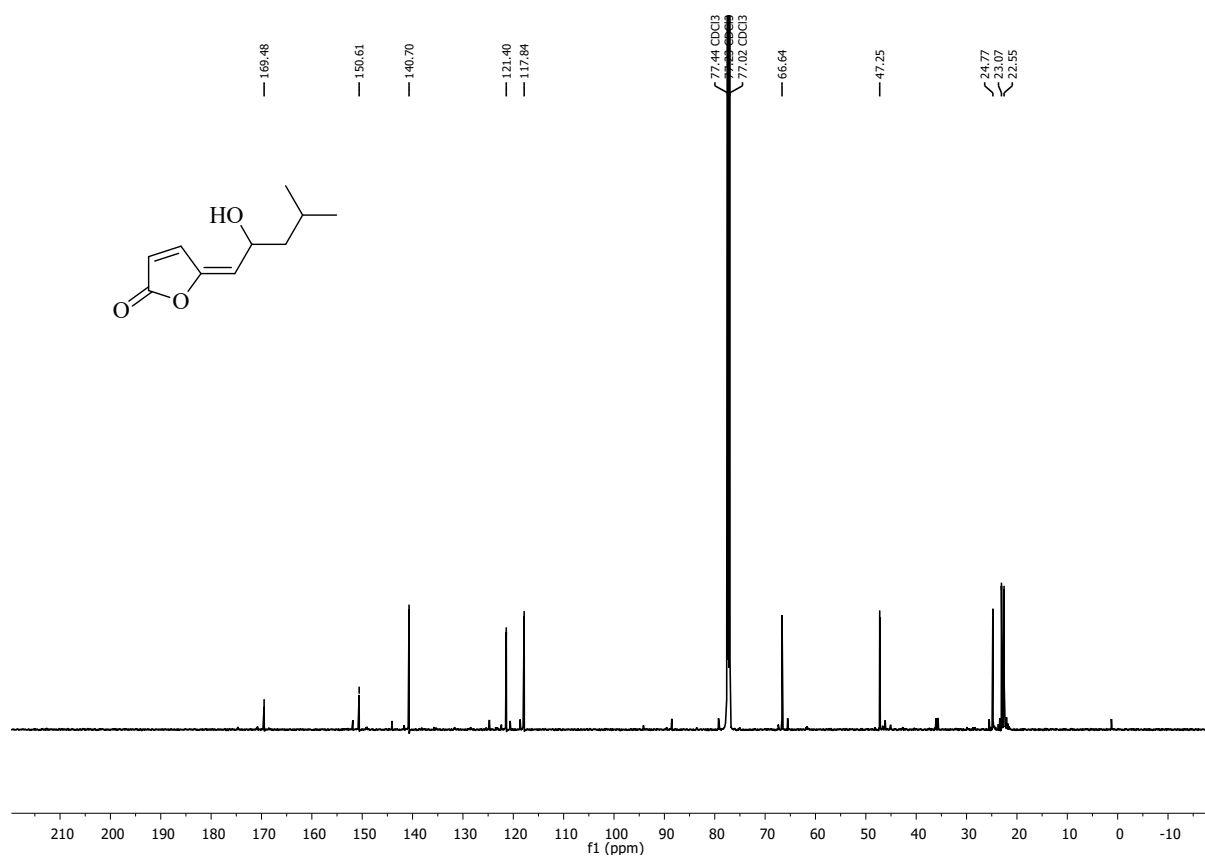

### DEPT NMR of compound 4k (100 MHz, CDCl<sub>3</sub>)

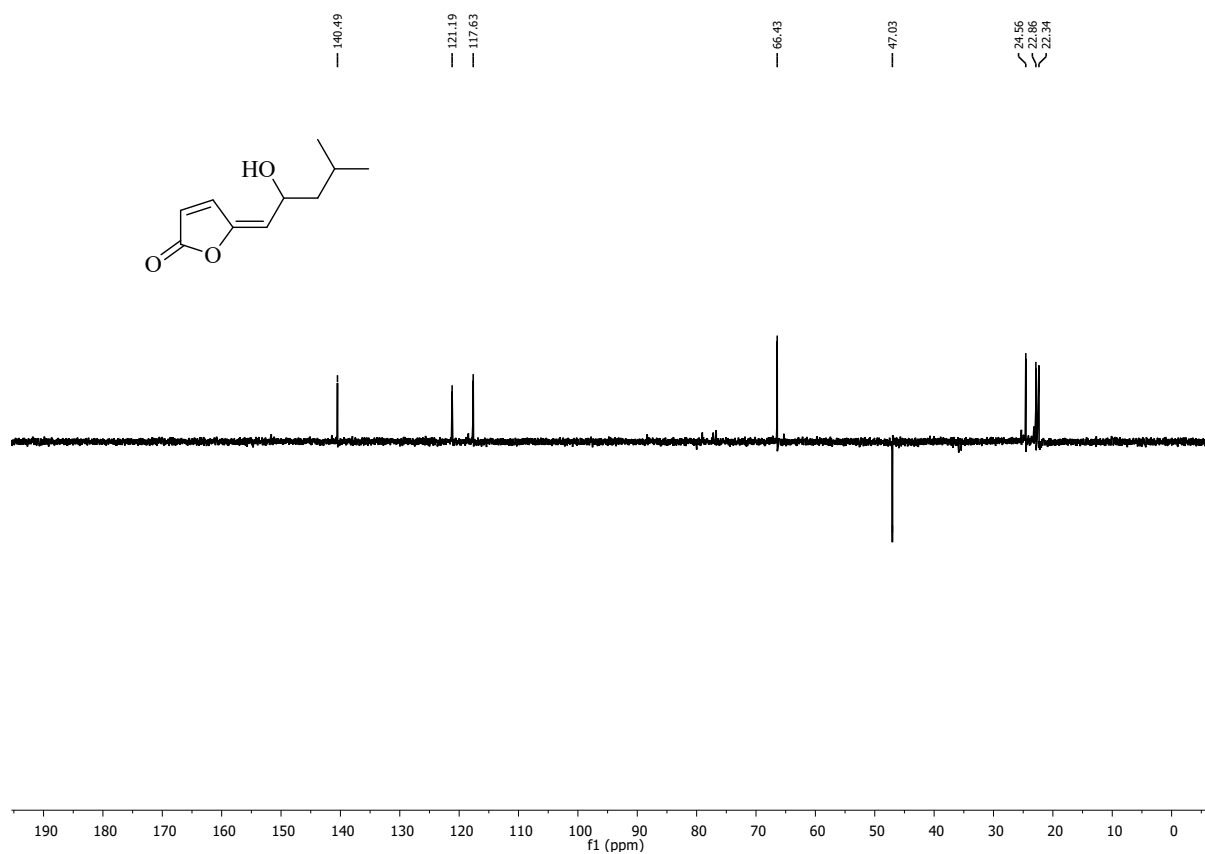

### $^1\text{H}$ NMR of compound 31 (400 MHz; $\text{CDCl}_3$ )

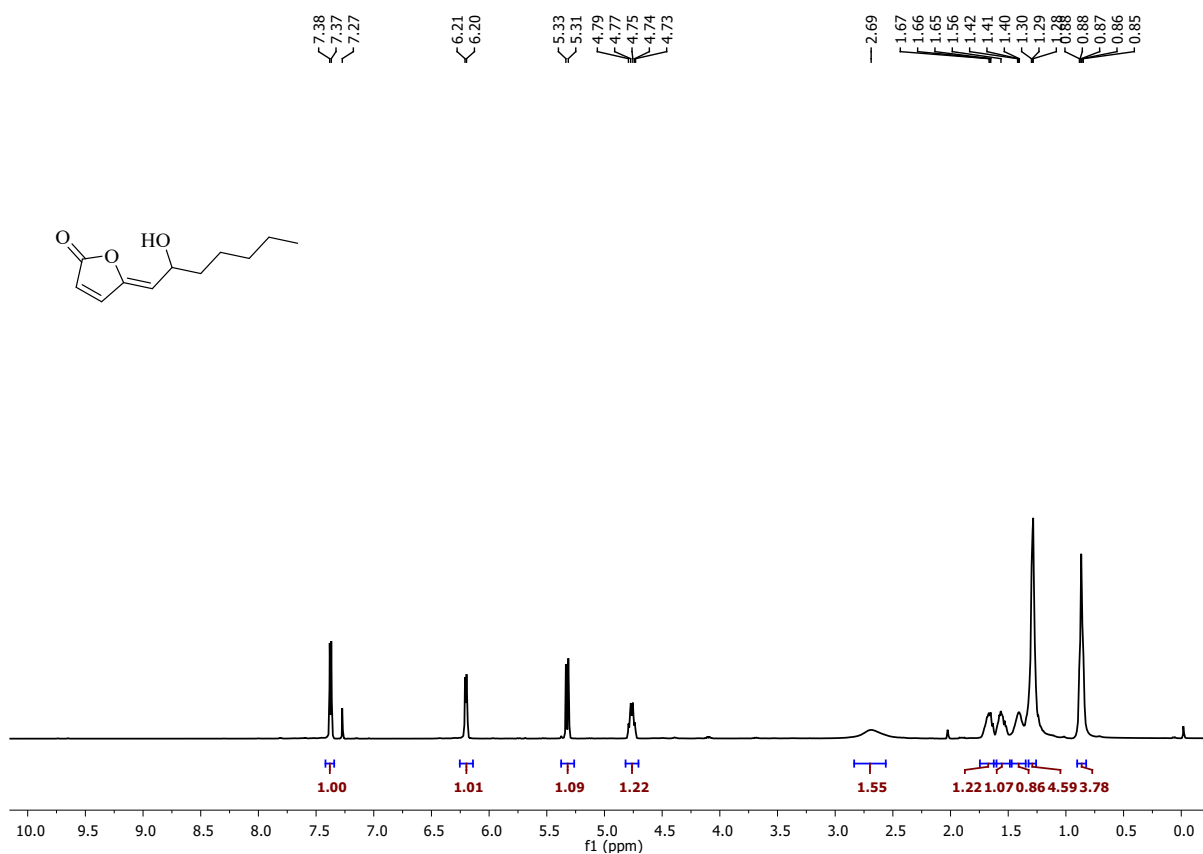

### $^{13}\text{C}$ NMR of compound 31 (100 MHz, $\text{CDCl}_3$ )

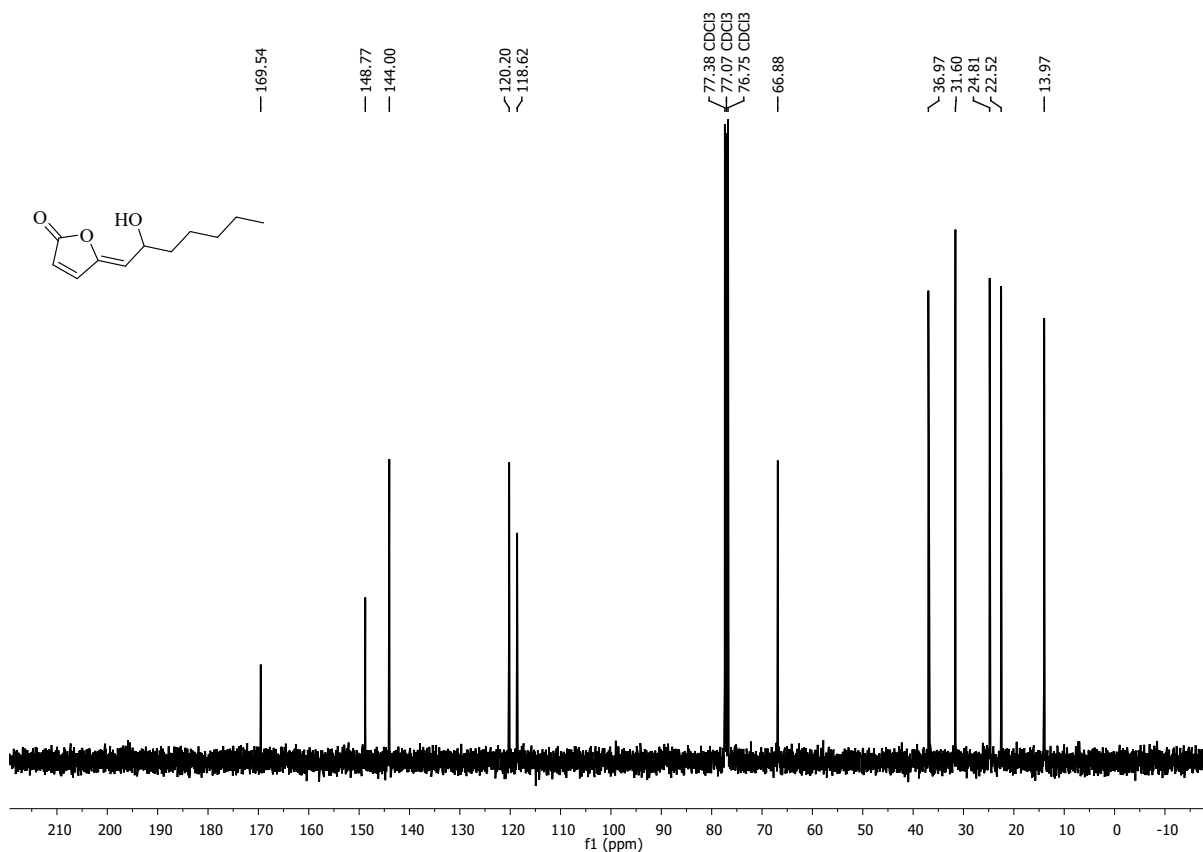

DEPT NMR of compound 3l (100 MHz, CDCl<sub>3</sub>)

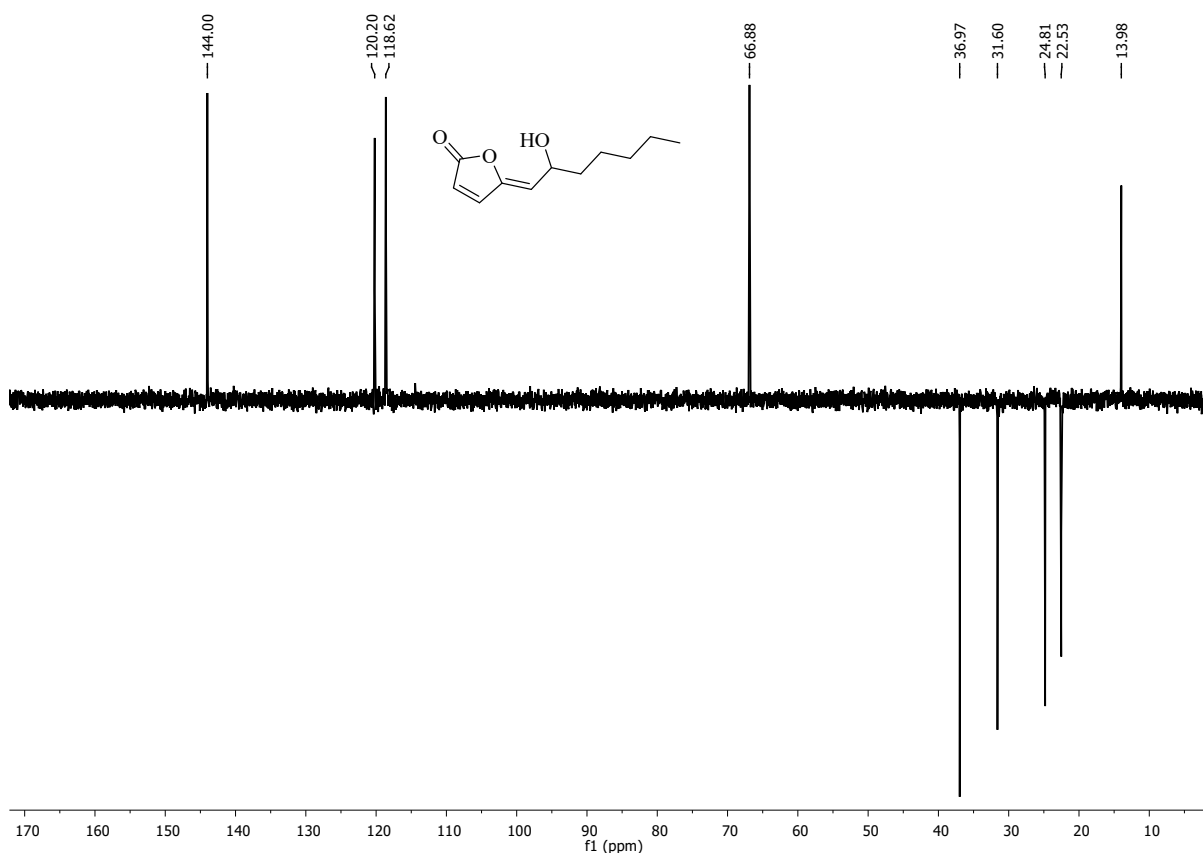

<sup>1</sup>H NMR of compound 4l (400 MHz, CDCl<sub>3</sub>)

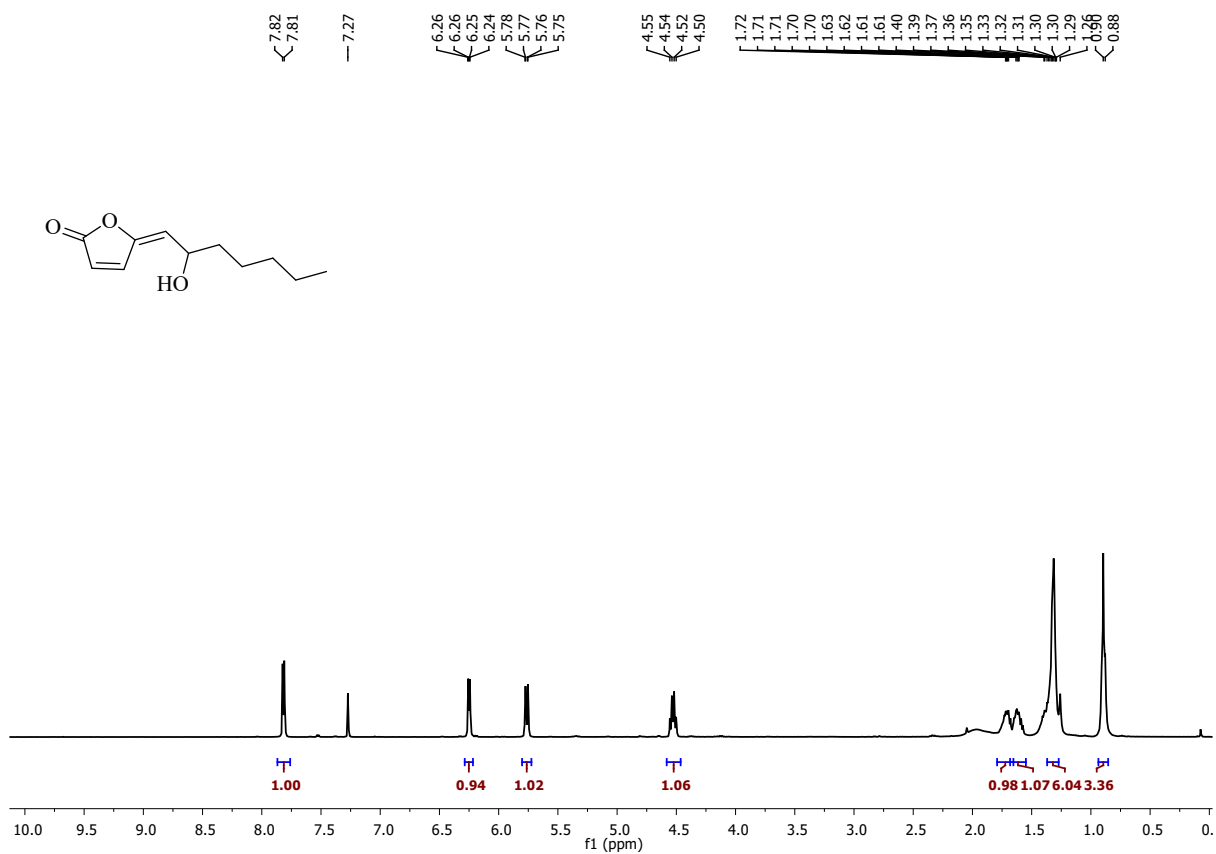

### <sup>13</sup>C NMR of compound 4l (100 MHz, CDCl<sub>3</sub>)

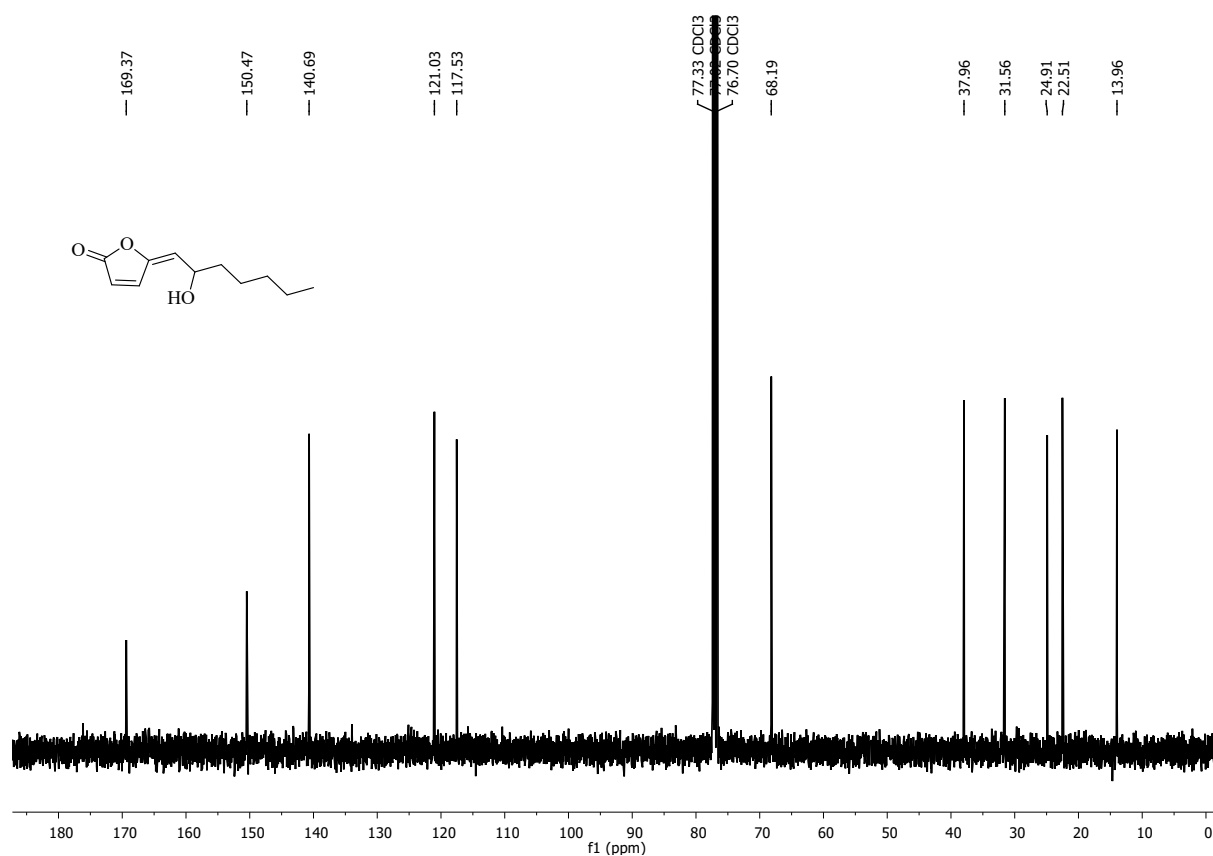

### DEPT NMR of compound 4l (100 MHz, CDCl<sub>3</sub>)

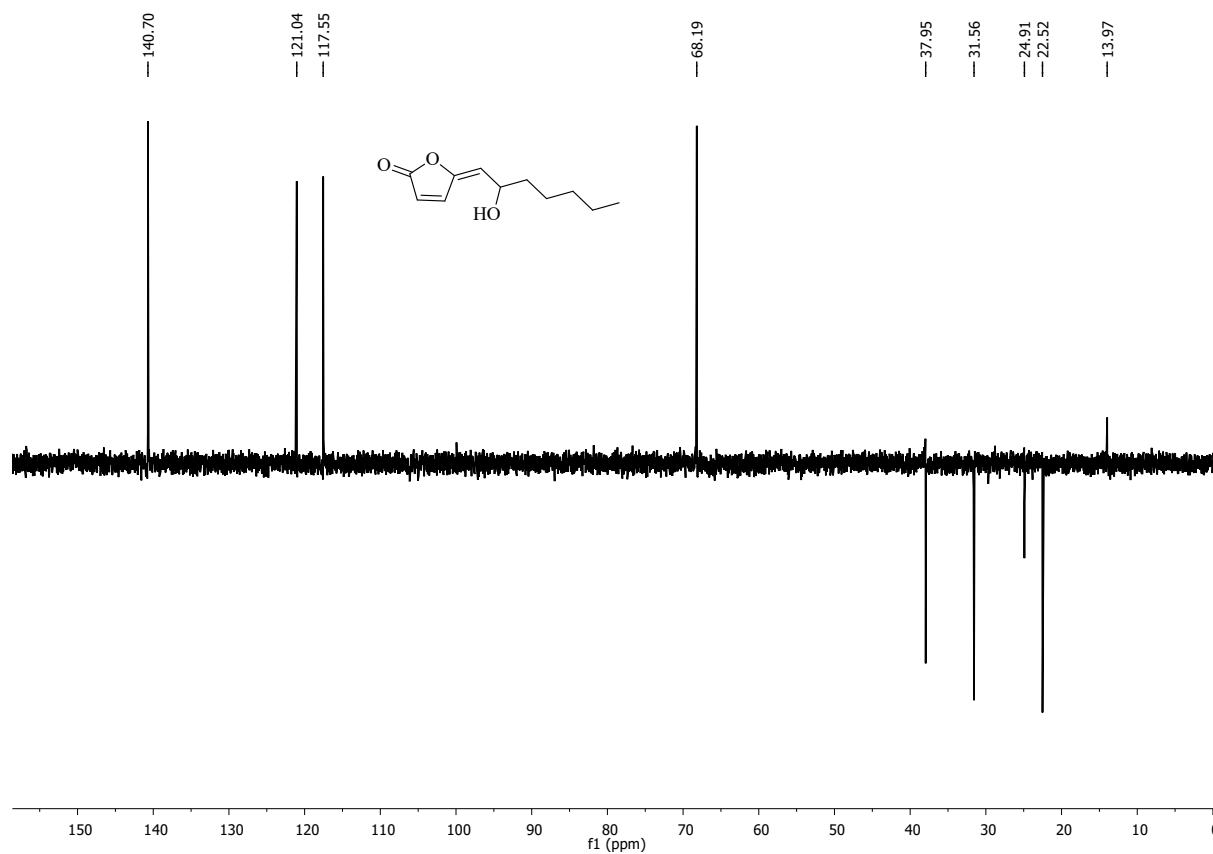

### <sup>1</sup>H NMR of compound 3m (400 MHz, CDCl<sub>3</sub>)

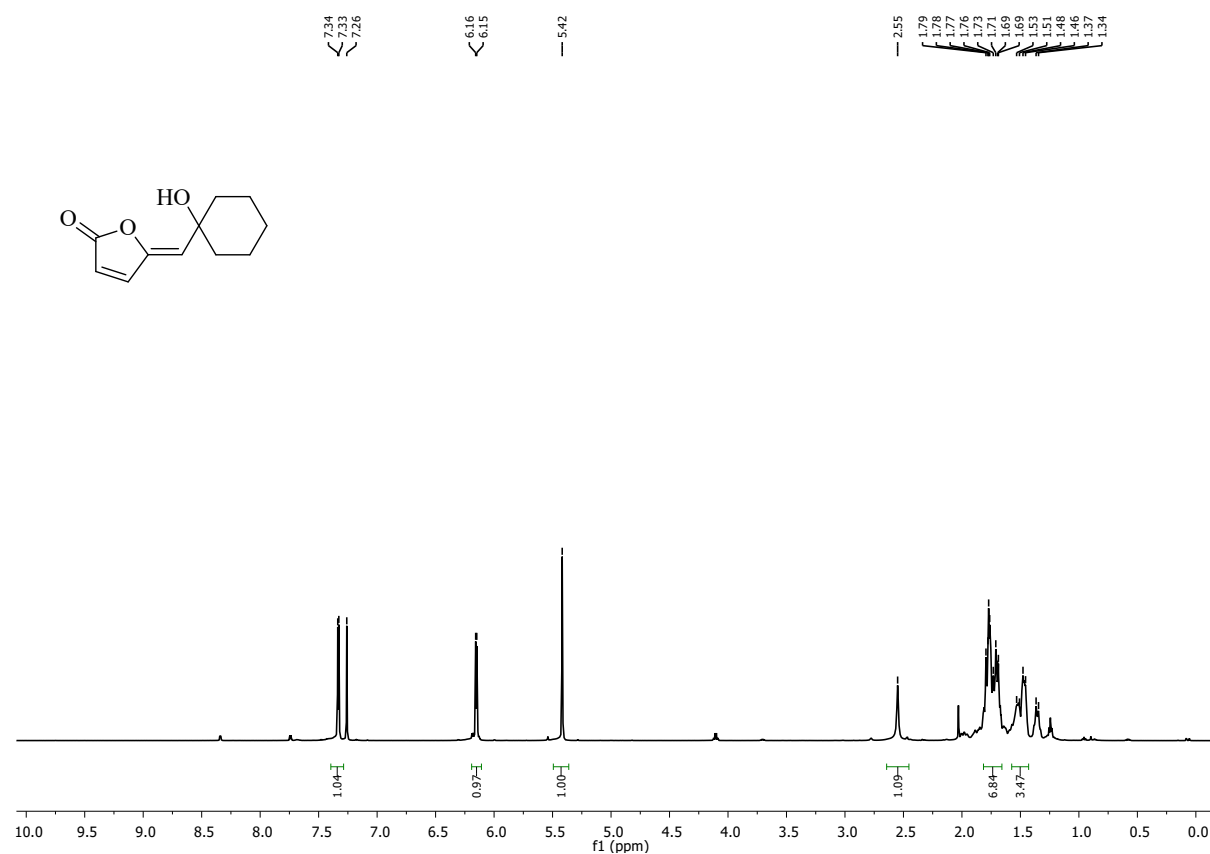

### <sup>13</sup>C NMR of compound 3m (100 MHz, CDCl<sub>3</sub>)

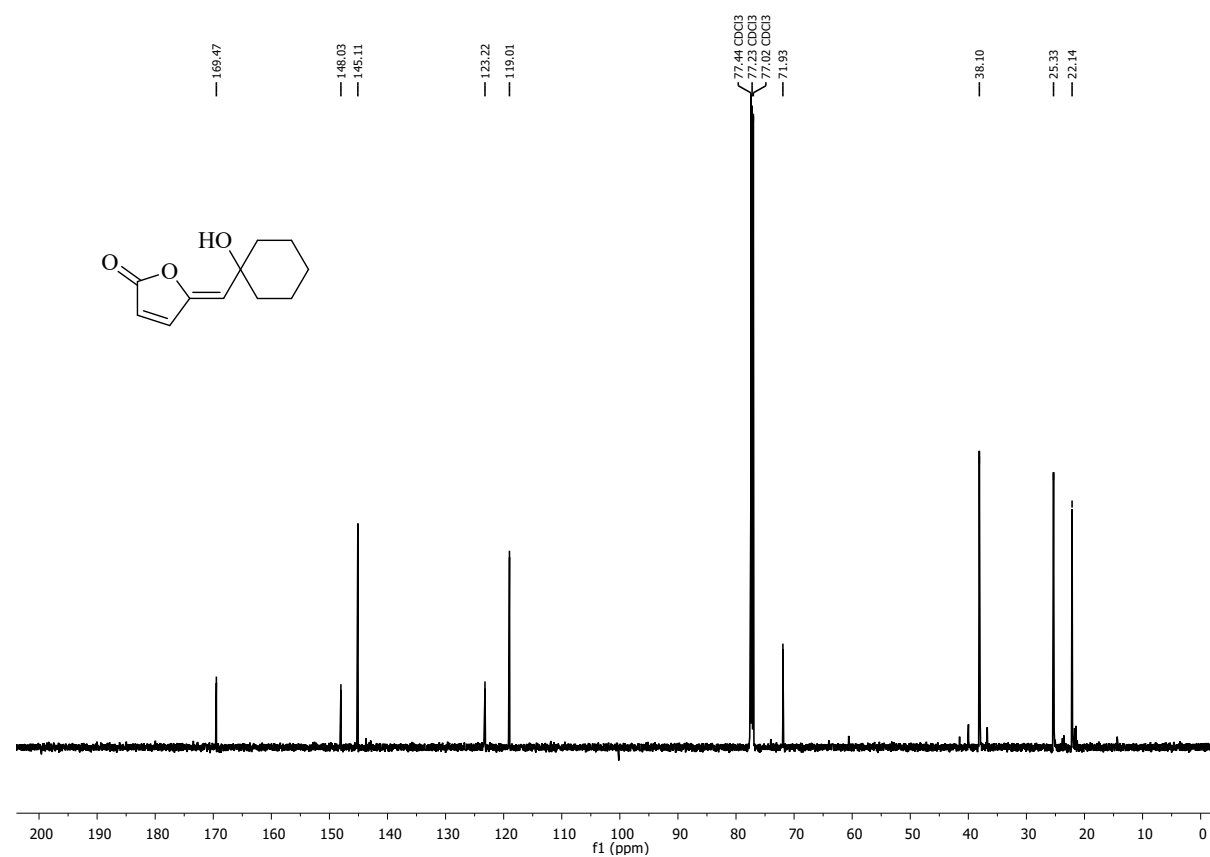

### DEPT NMR of compound 3m (100 MHz, CDCl<sub>3</sub>)

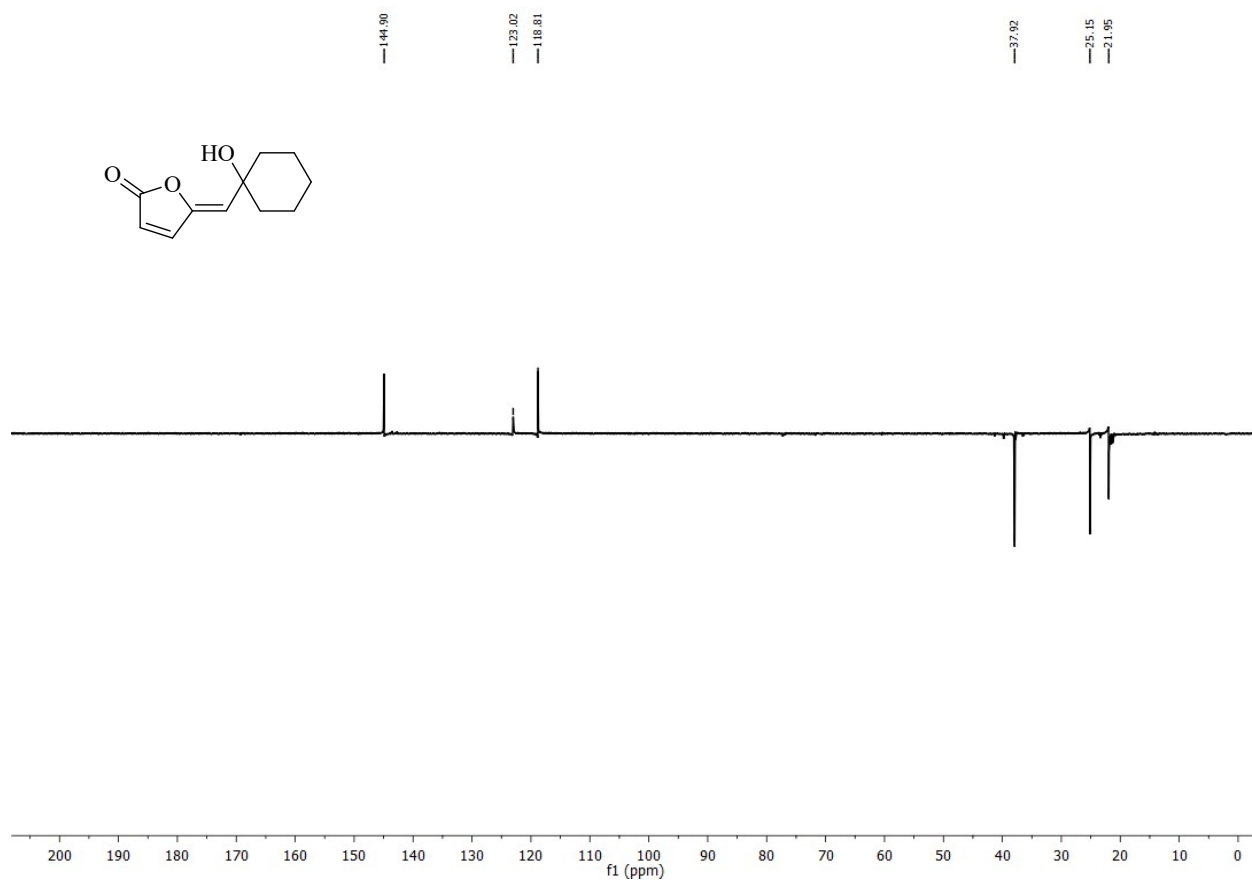

### <sup>1</sup>H NMR of compound 4m (400 MHz, CDCl<sub>3</sub>)

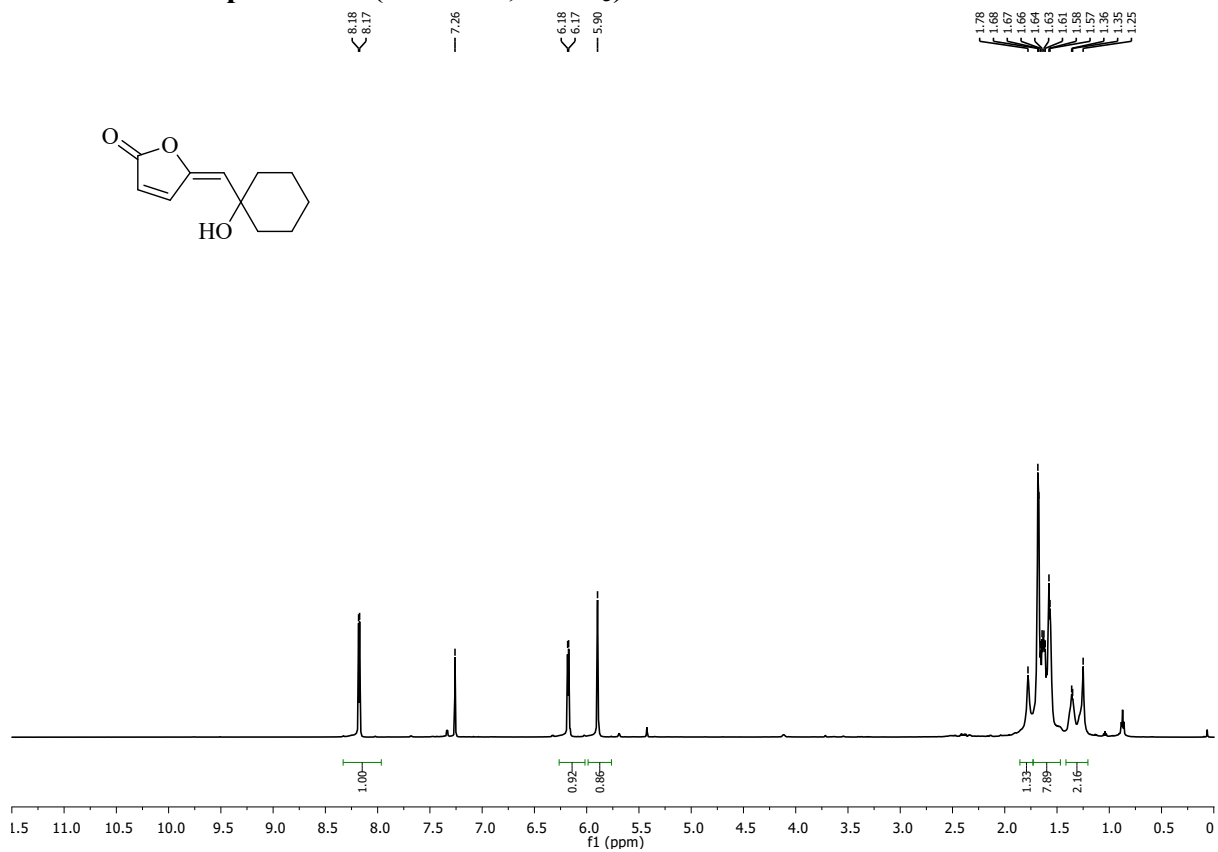



### $^{13}\text{C}$ NMR of compound 4m (100 MHz, $\text{CDCl}_3$ )

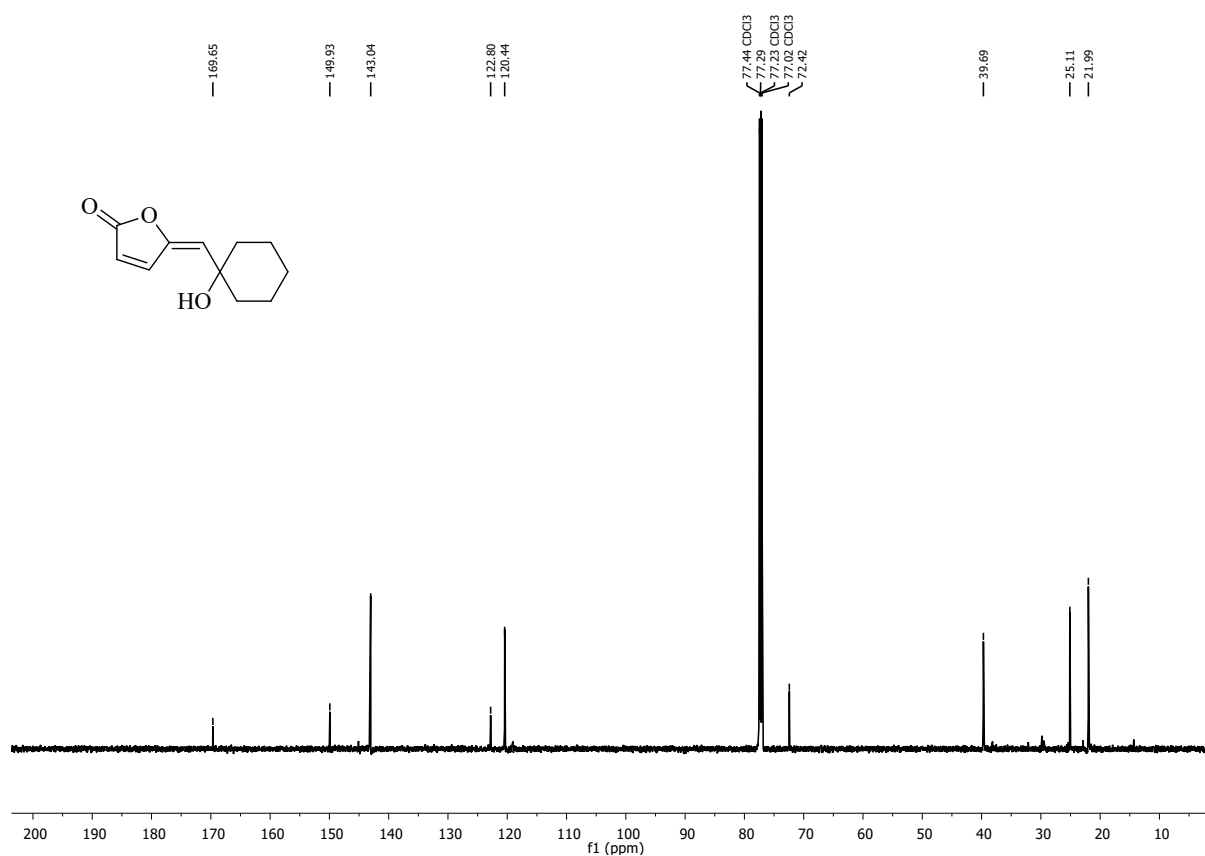

### DEPT NMR of compound 4m (100 MHz, $\text{CDCl}_3$ )

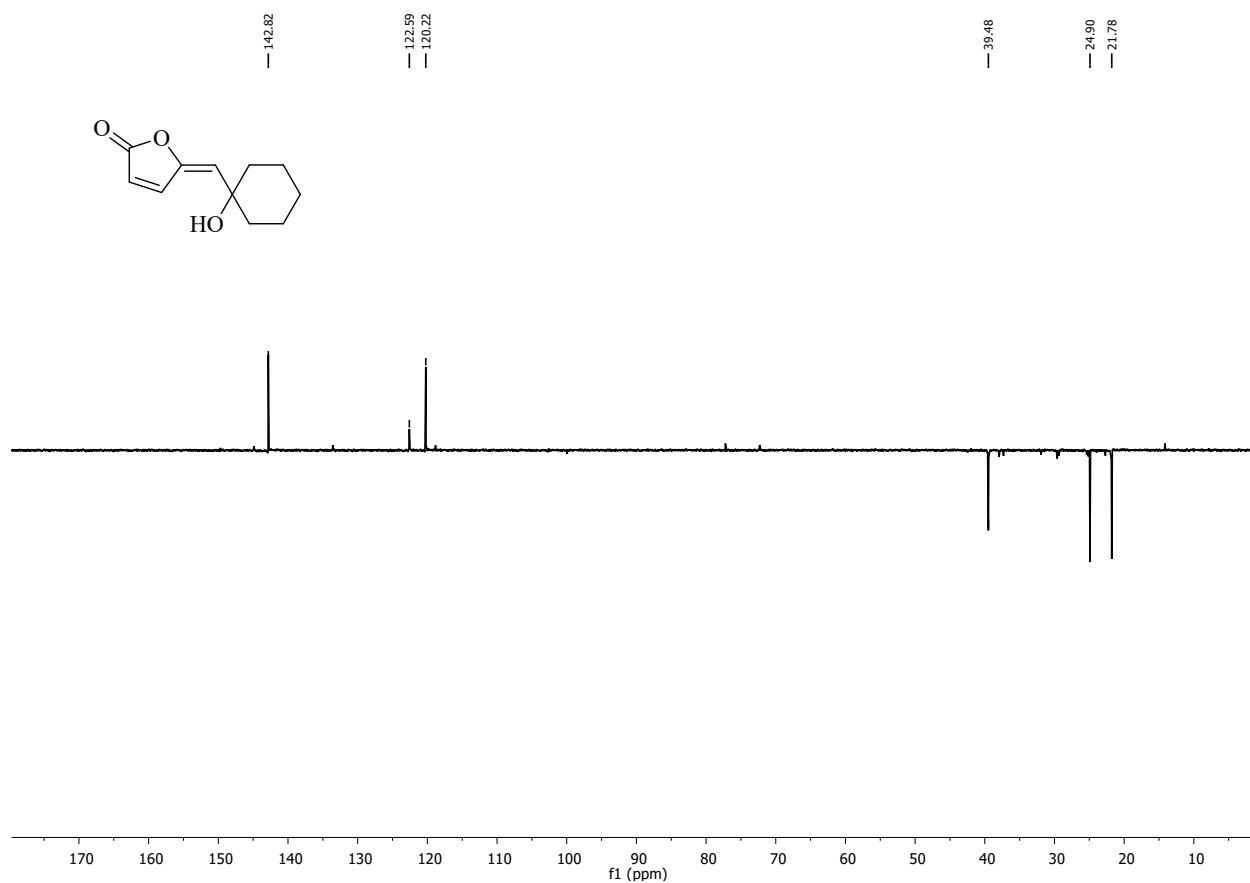

### $^1\text{H}$ NMR of compound 3n (400 MHz, $\text{CDCl}_3$ )

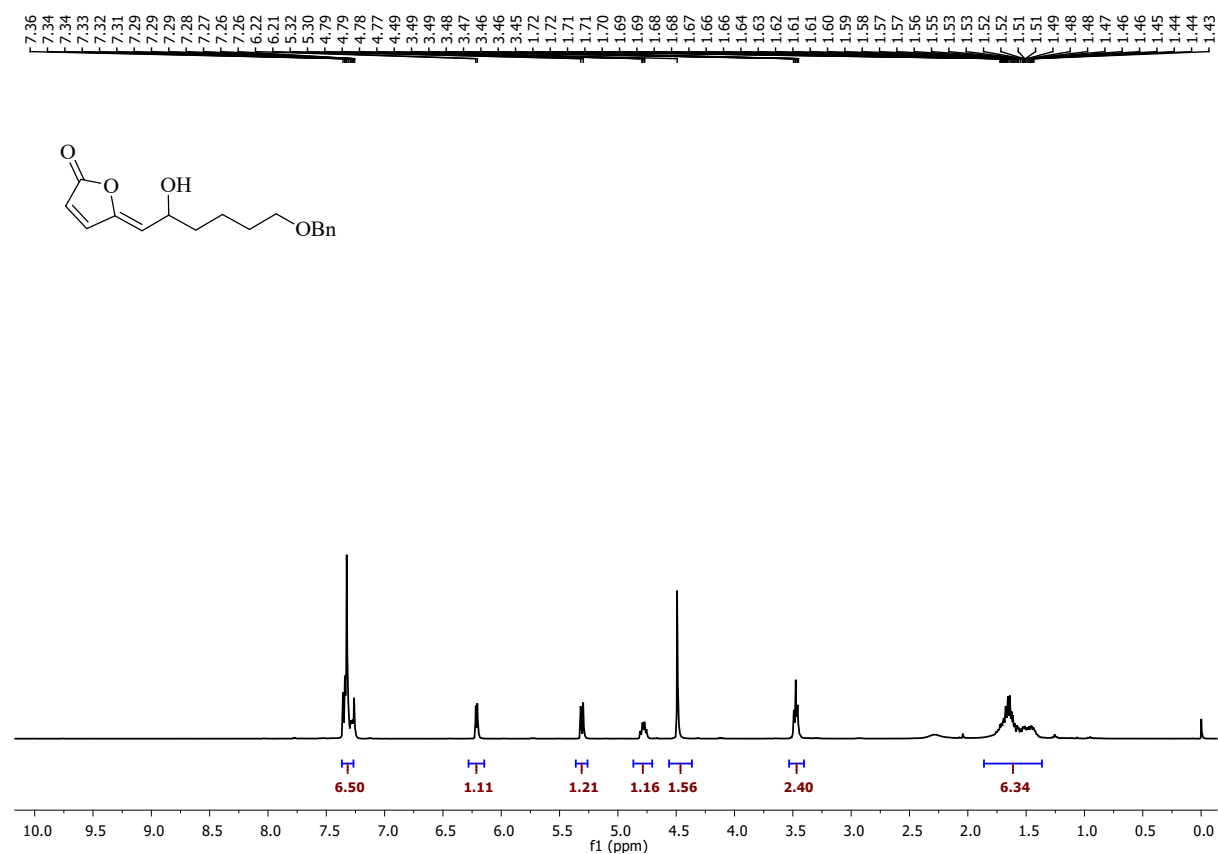

### $^{13}\text{C}$ NMR of compound 3n (100 MHz, $\text{CDCl}_3$ )

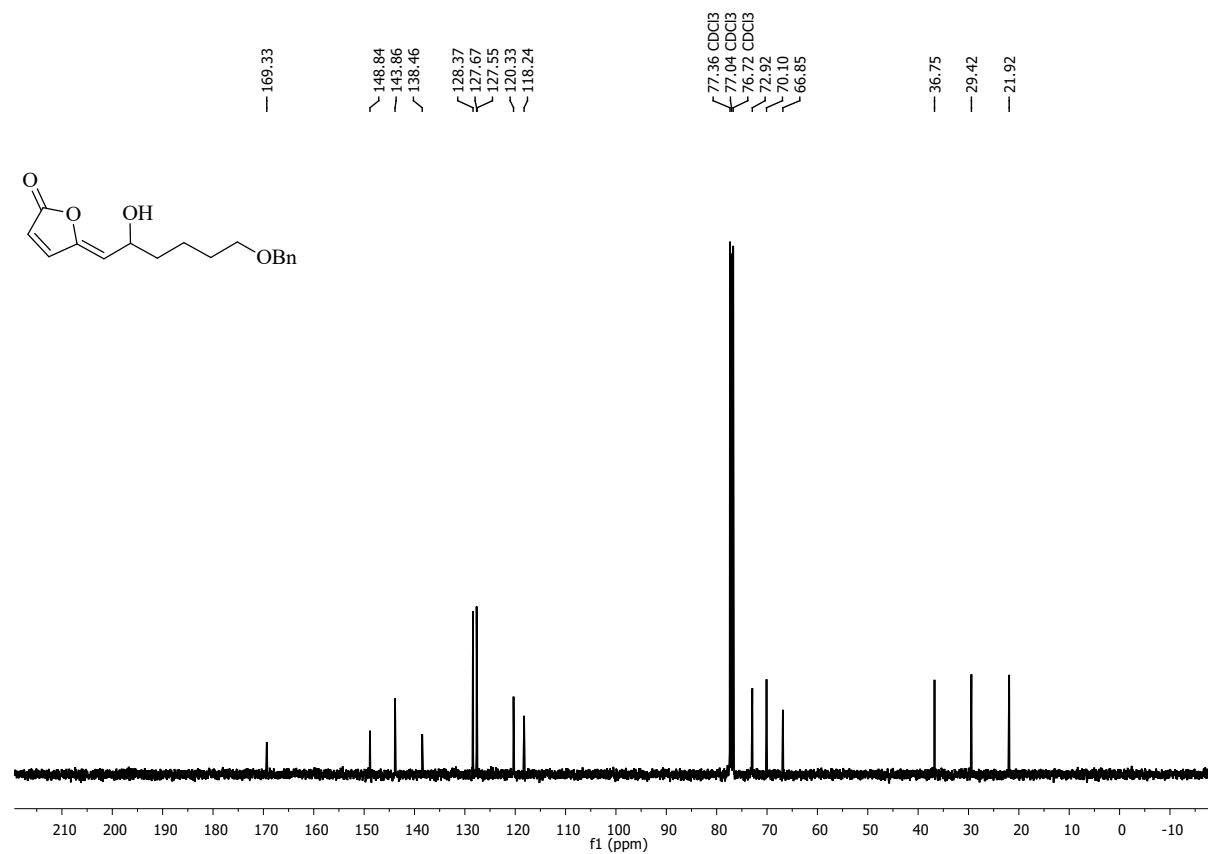

### DEPT NMR of compound 3n (100 MHz, CDCl<sub>3</sub>)

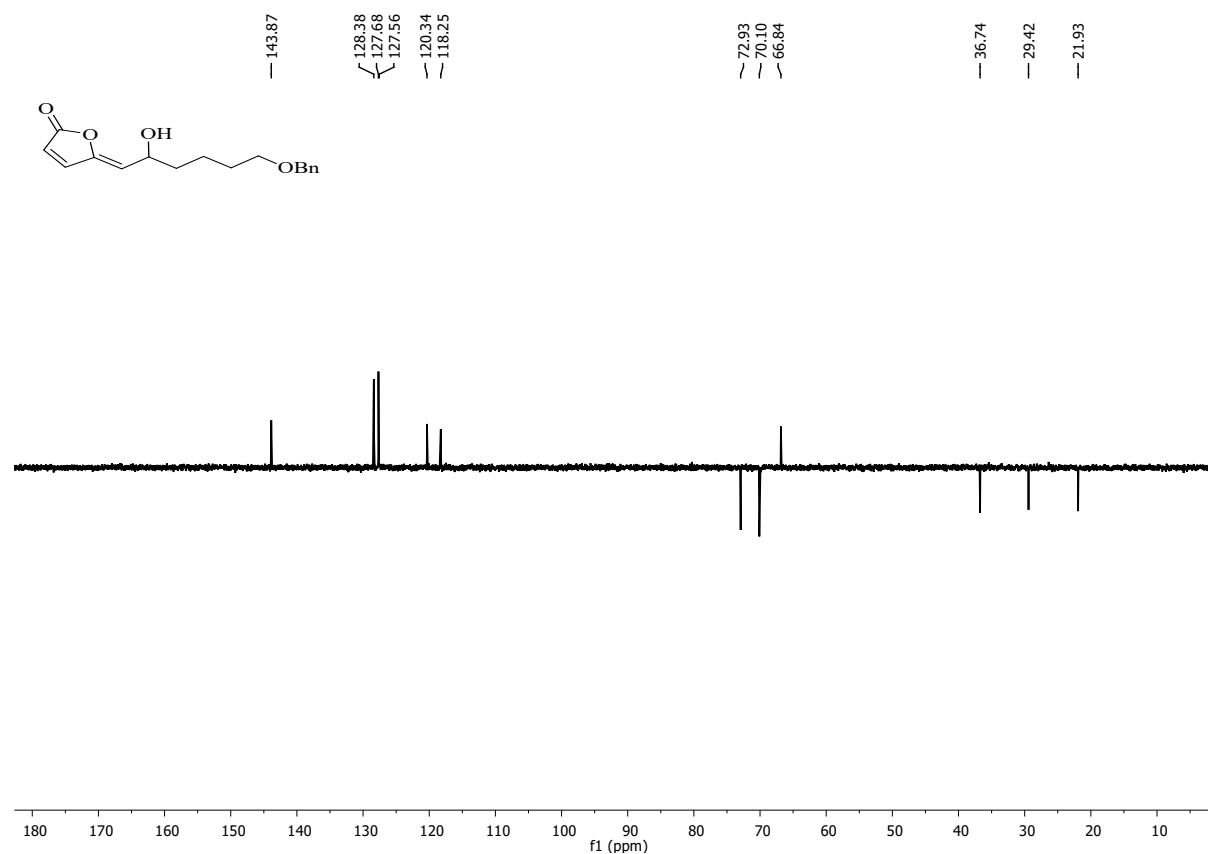

### <sup>1</sup>H NMR of compound 4n (400 MHz, CDCl<sub>3</sub>)

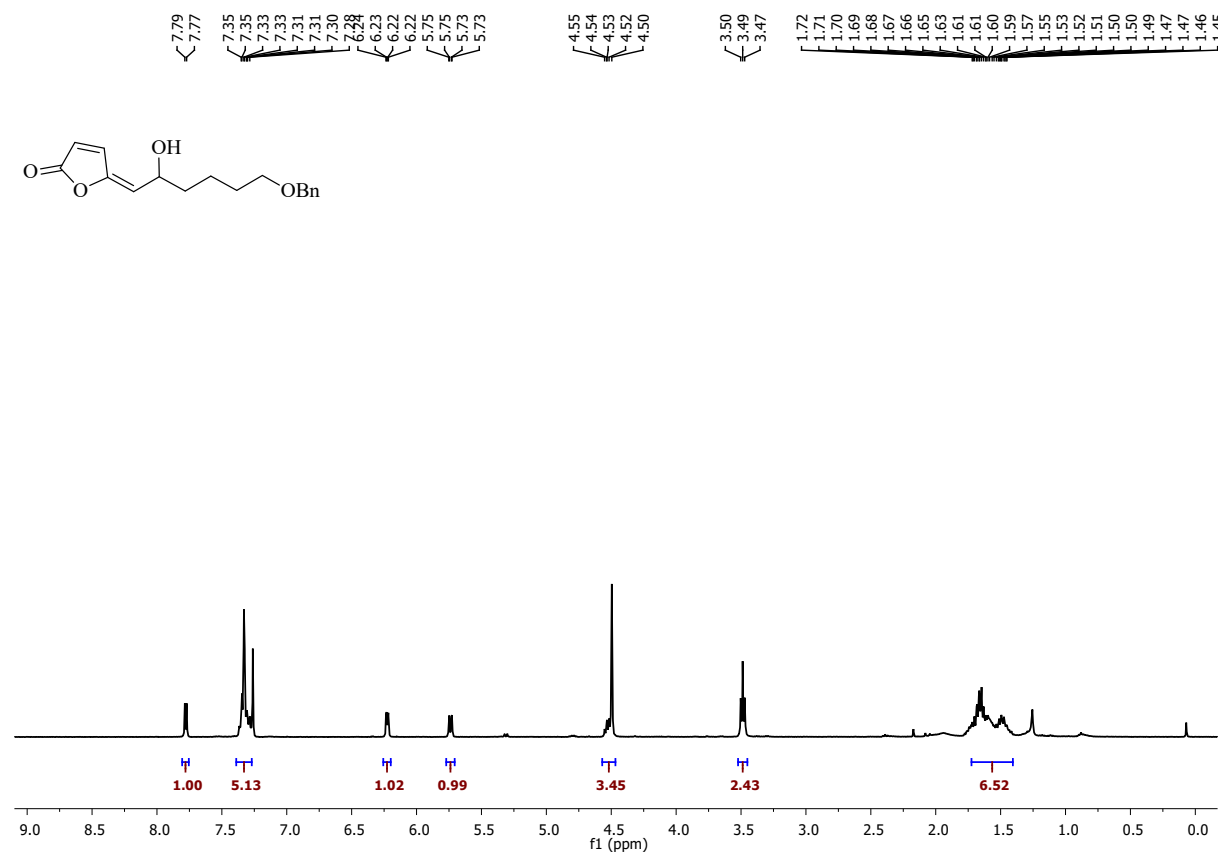

### $^{13}\text{C}$ NMR of compound 4n (100 MHz, $\text{CDCl}_3$ )

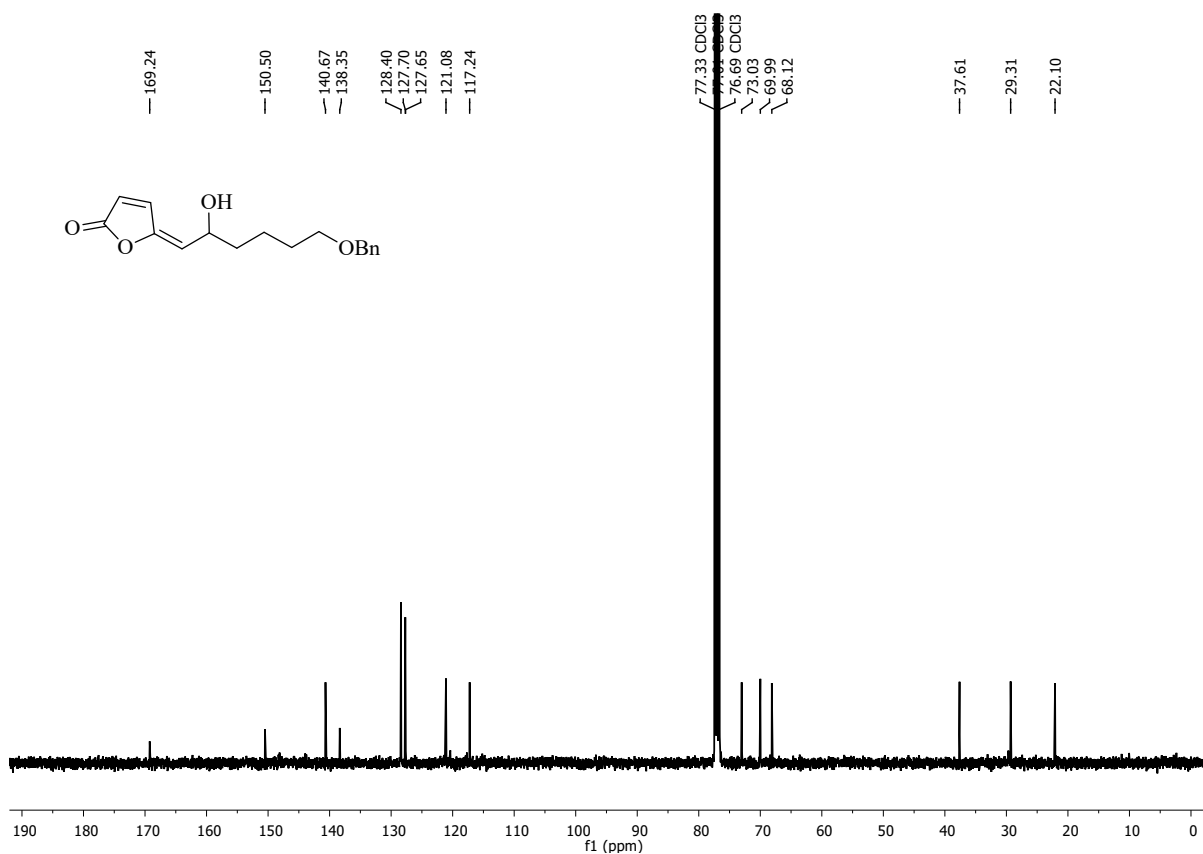

### DEPT NMR of compound 4n (100 MHz, $\text{CDCl}_3$ )

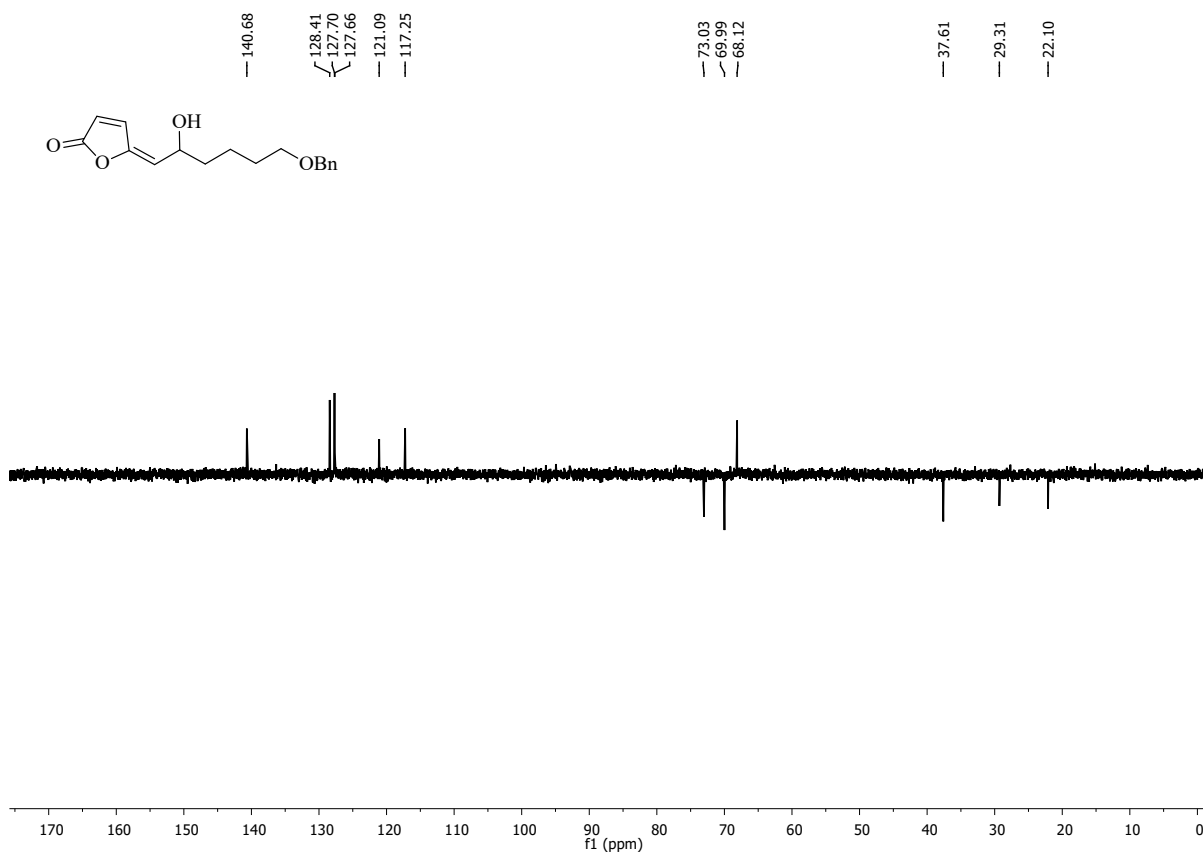

### $^1\text{H}$ NMR of compound 3o (600 MHz, $\text{CDCl}_3$ )

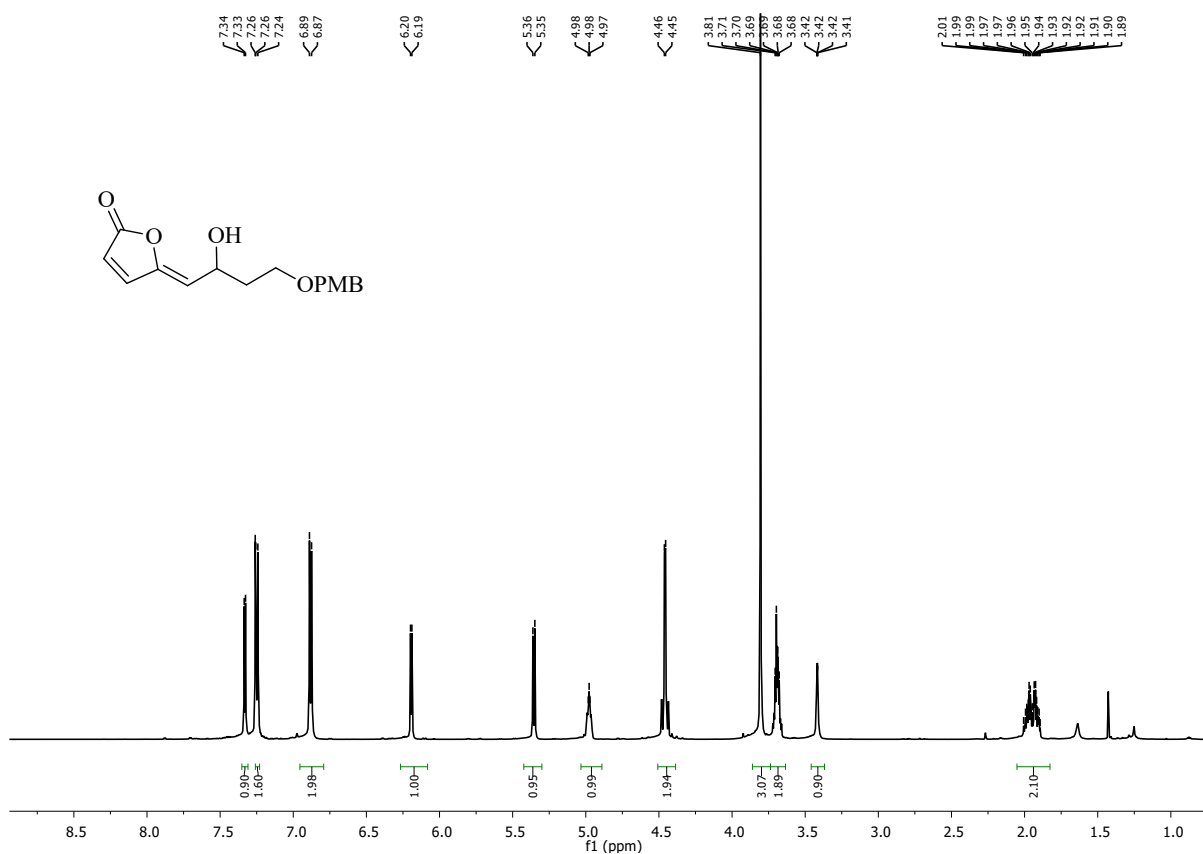

### $^{13}\text{C}$ NMR of compound 3o (150 MHz, $\text{CDCl}_3$ )

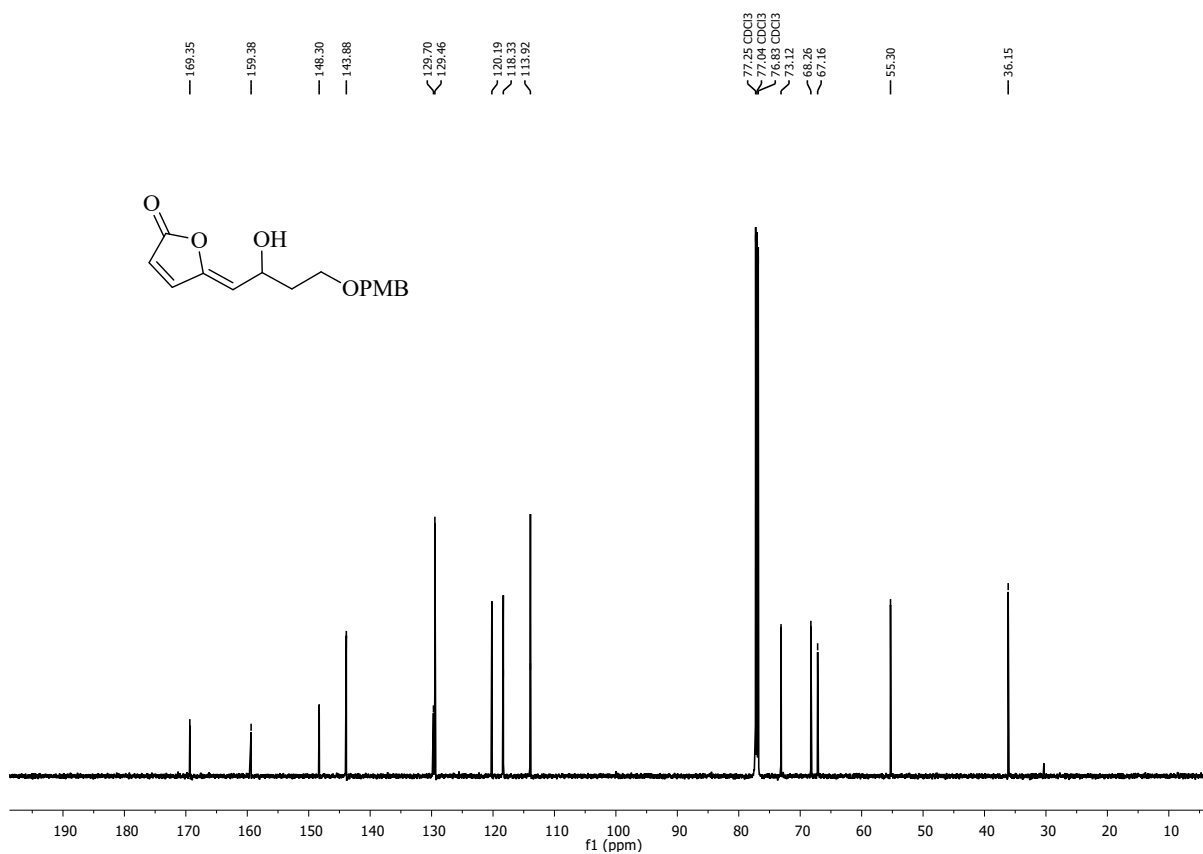

### DEPT-135 NMR of compound 3o (150 MHz, CDCl<sub>3</sub>)

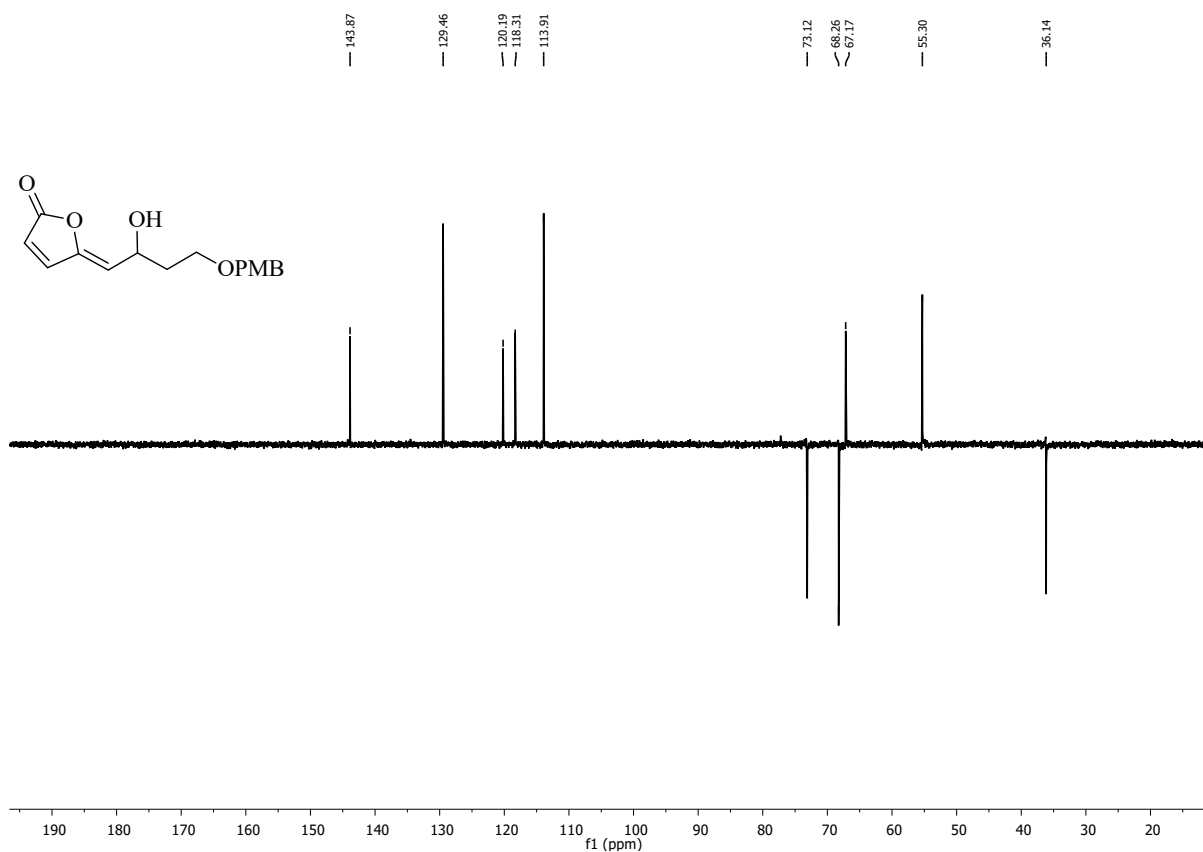

### <sup>1</sup>H NMR of compound 4o (600 MHz, CDCl<sub>3</sub>)

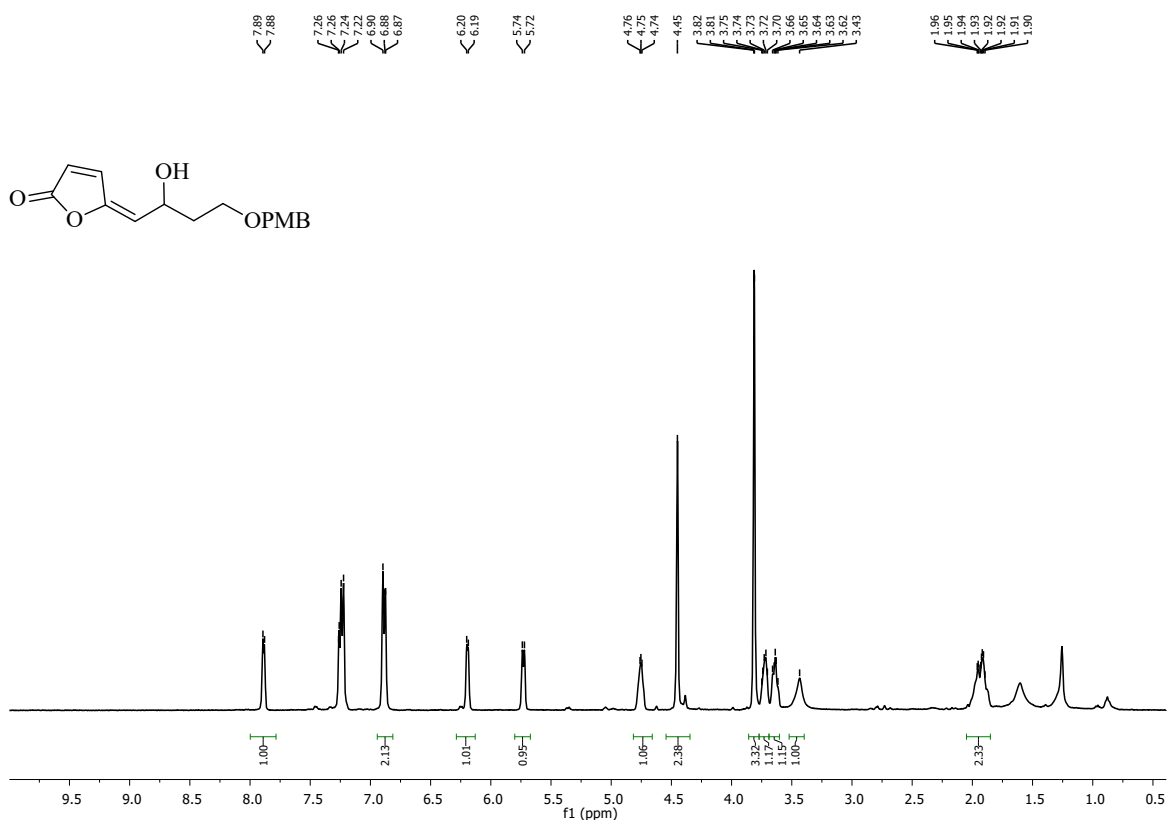

### $^{13}\text{C}$ NMR of compound 4o (150 MHz, $\text{CDCl}_3$ )

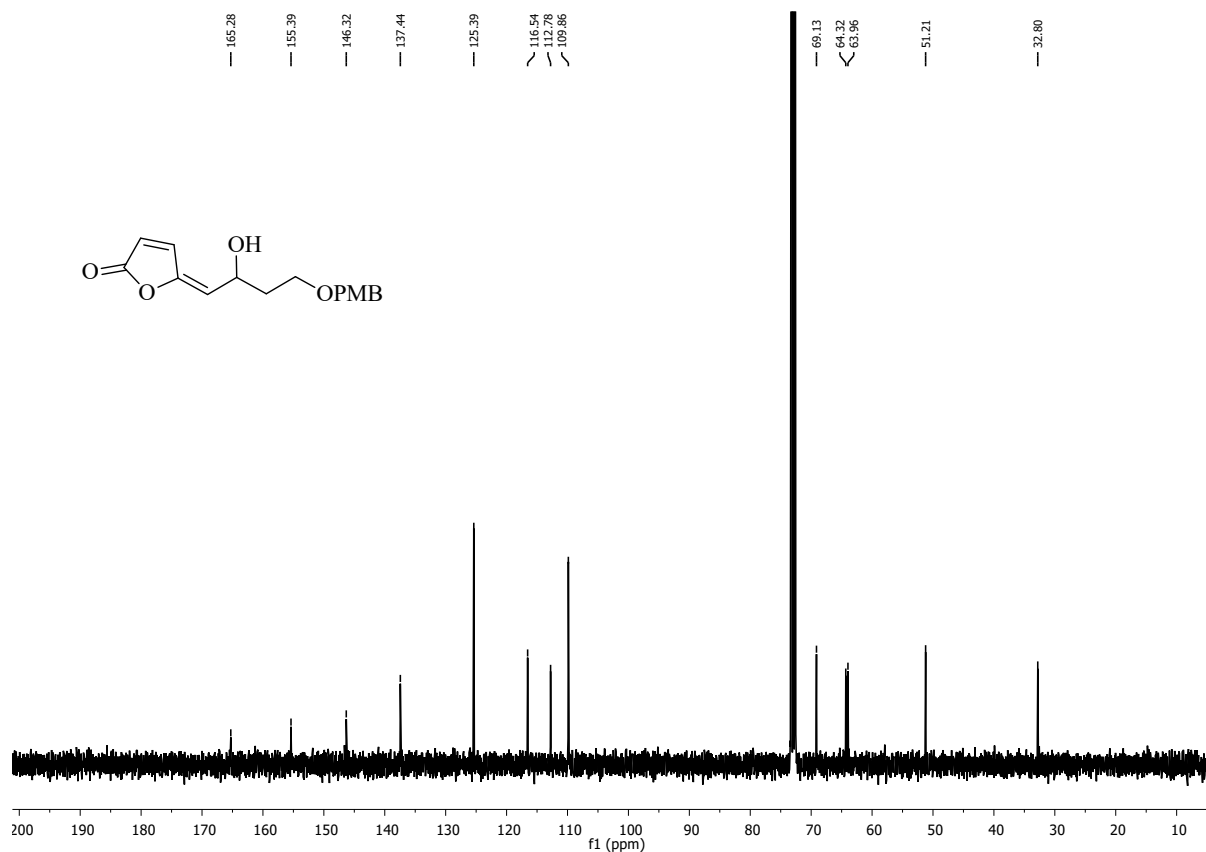

### DEPT-135 NMR of compound 4o (150 MHz, $\text{CDCl}_3$ )

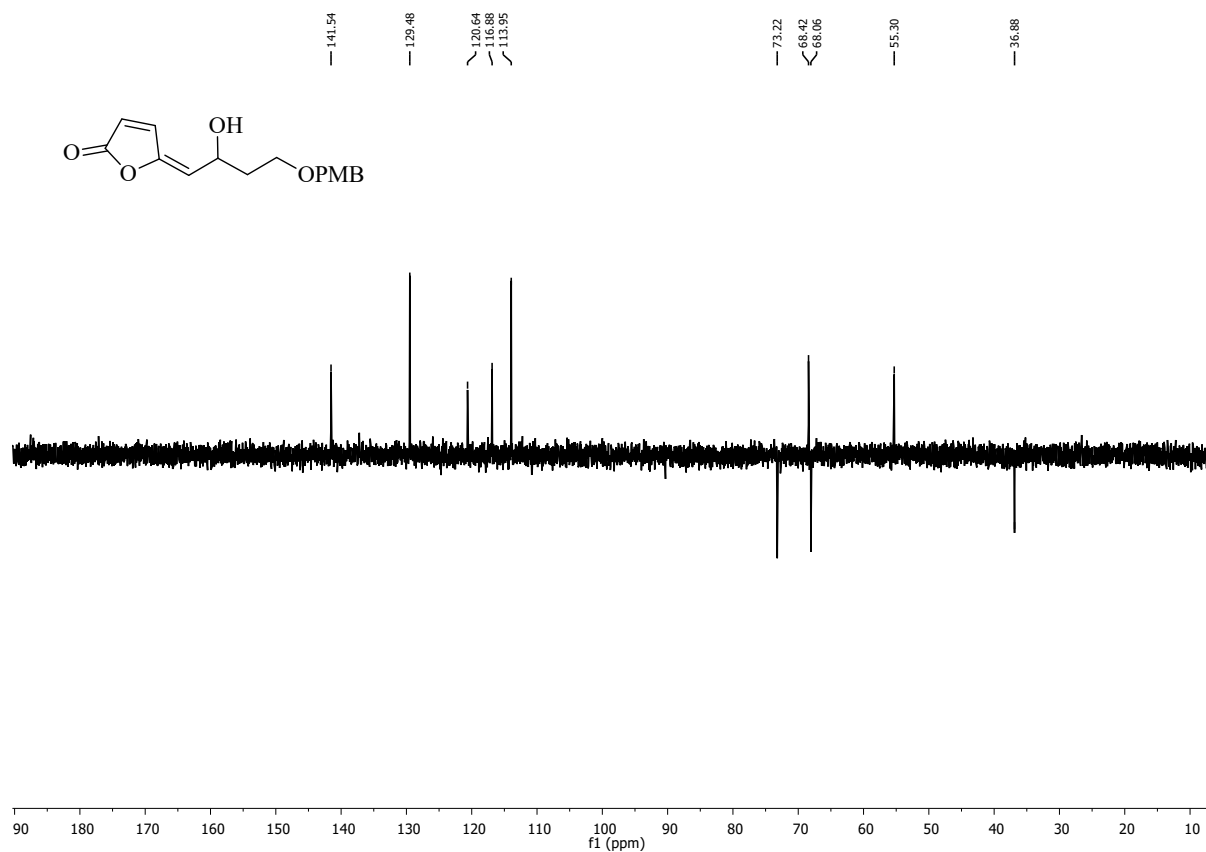

### UV-Vis spectrum of few $\gamma$ -Z-alkylidenebutenolides

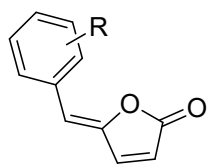

R = *p*-Cl, *p*-NO<sub>2</sub>, *p*-OMe, *o*-NO<sub>2</sub> and *p*-Ph

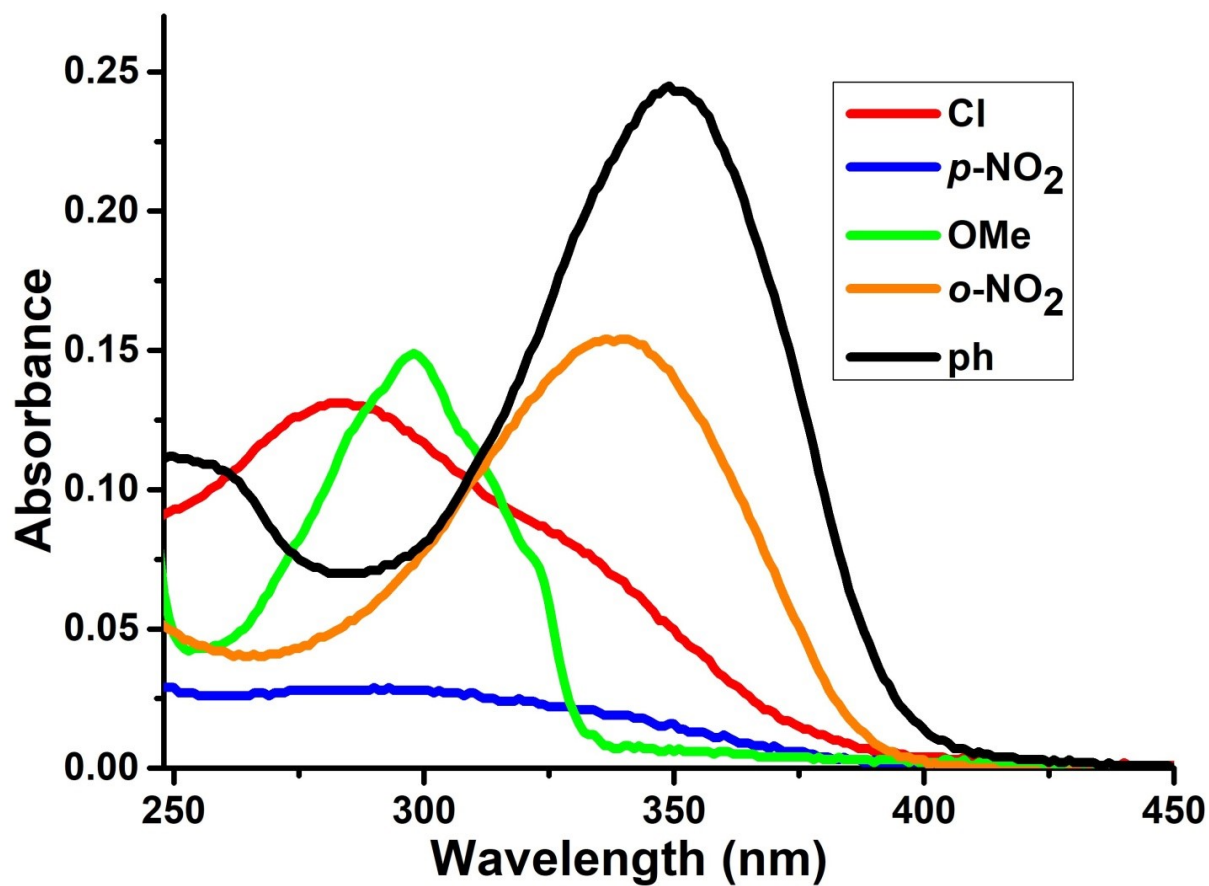



**$^1\text{H}$  (600 MHz) NMR of compound 12 in  $\text{CDCl}_3$**

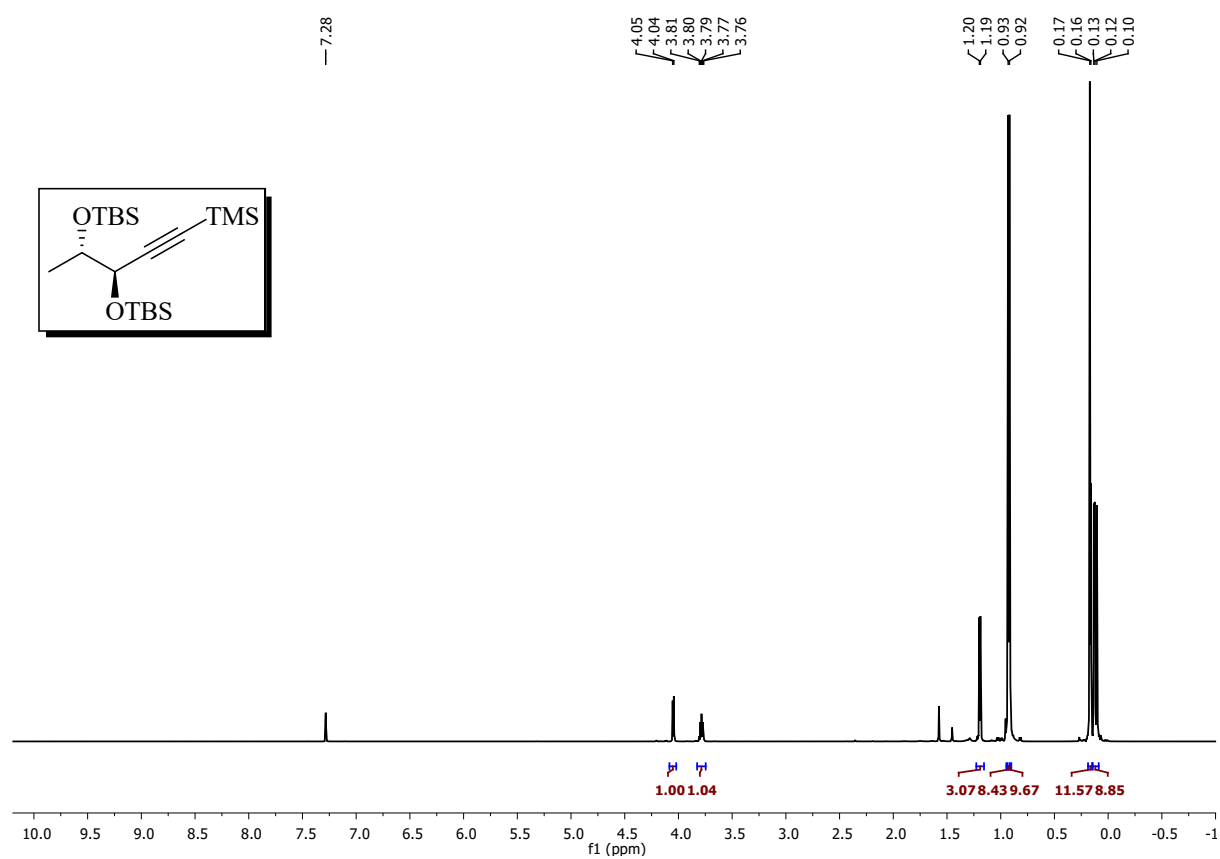

**$^{13}\text{C}$  (150 MHz) NMR of compound 12 in  $\text{CDCl}_3$**

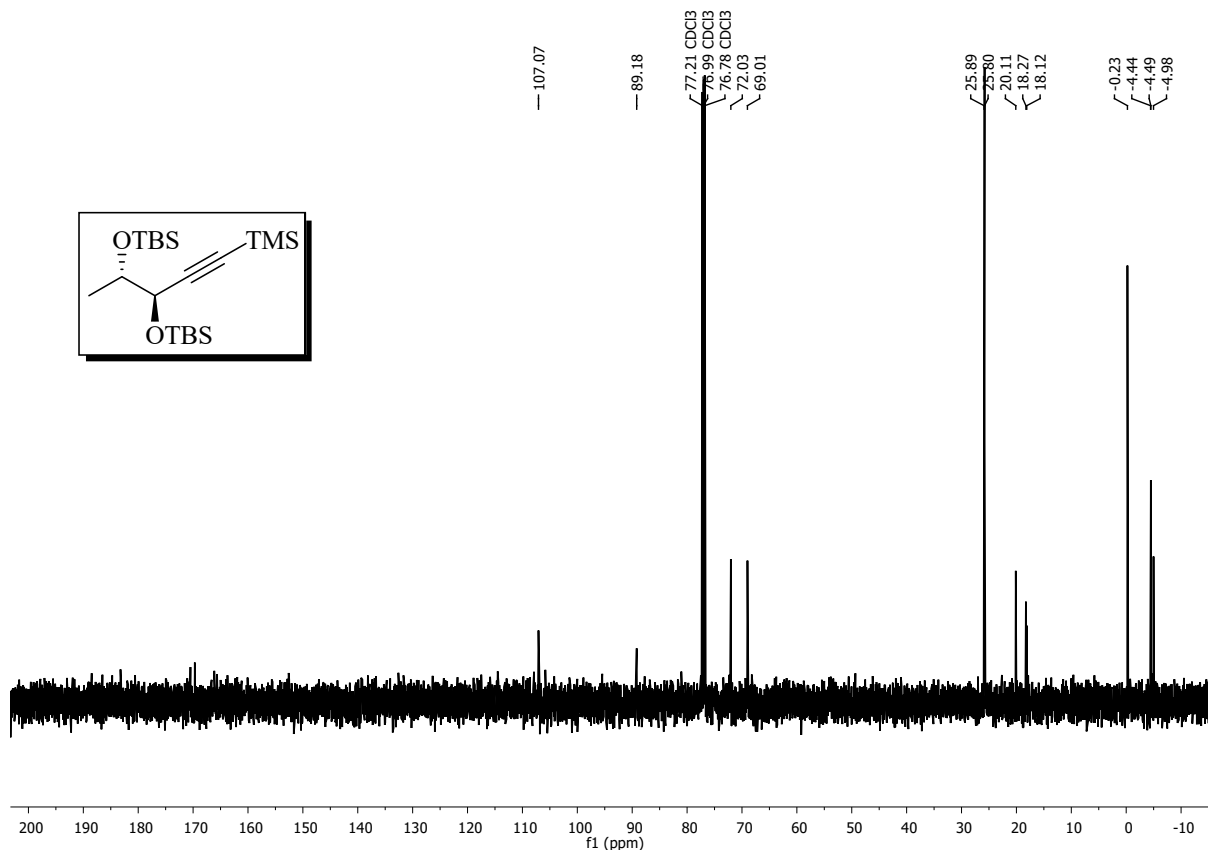

**DEPT (150 MHz) NMR of compound 12 in CDCl<sub>3</sub>**

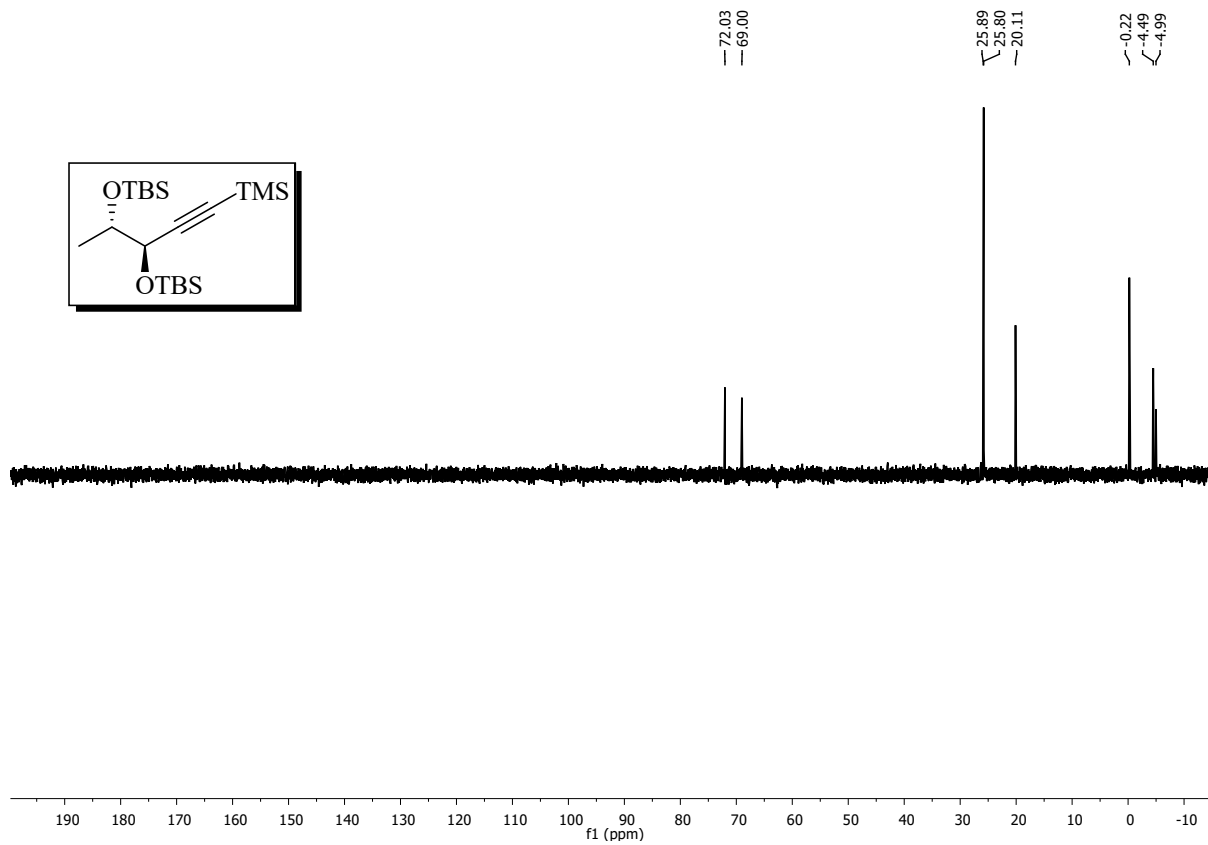

**<sup>1</sup>H (600 MHz) NMR of compound 7 in CDCl<sub>3</sub>**

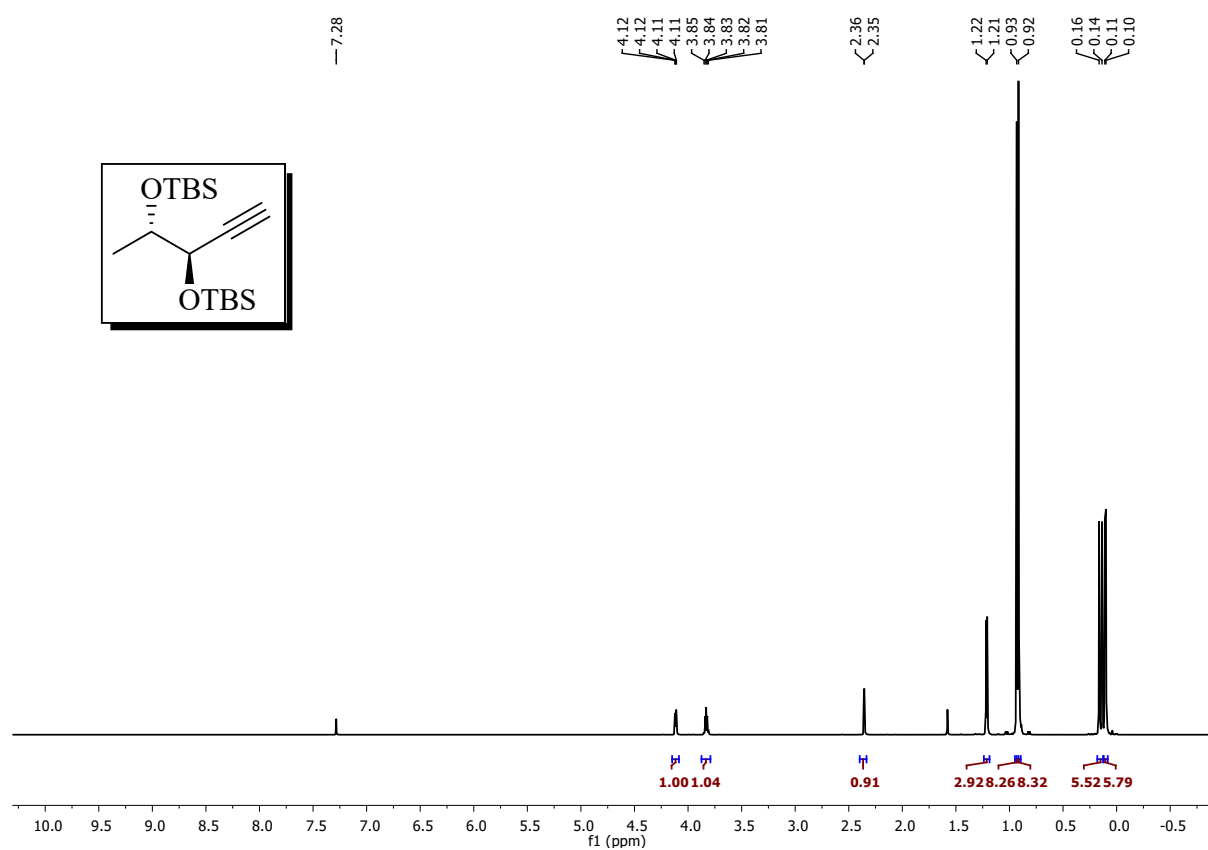

**<sup>13</sup>C (150 MHz) NMR of compound 7 in CDCl<sub>3</sub>**

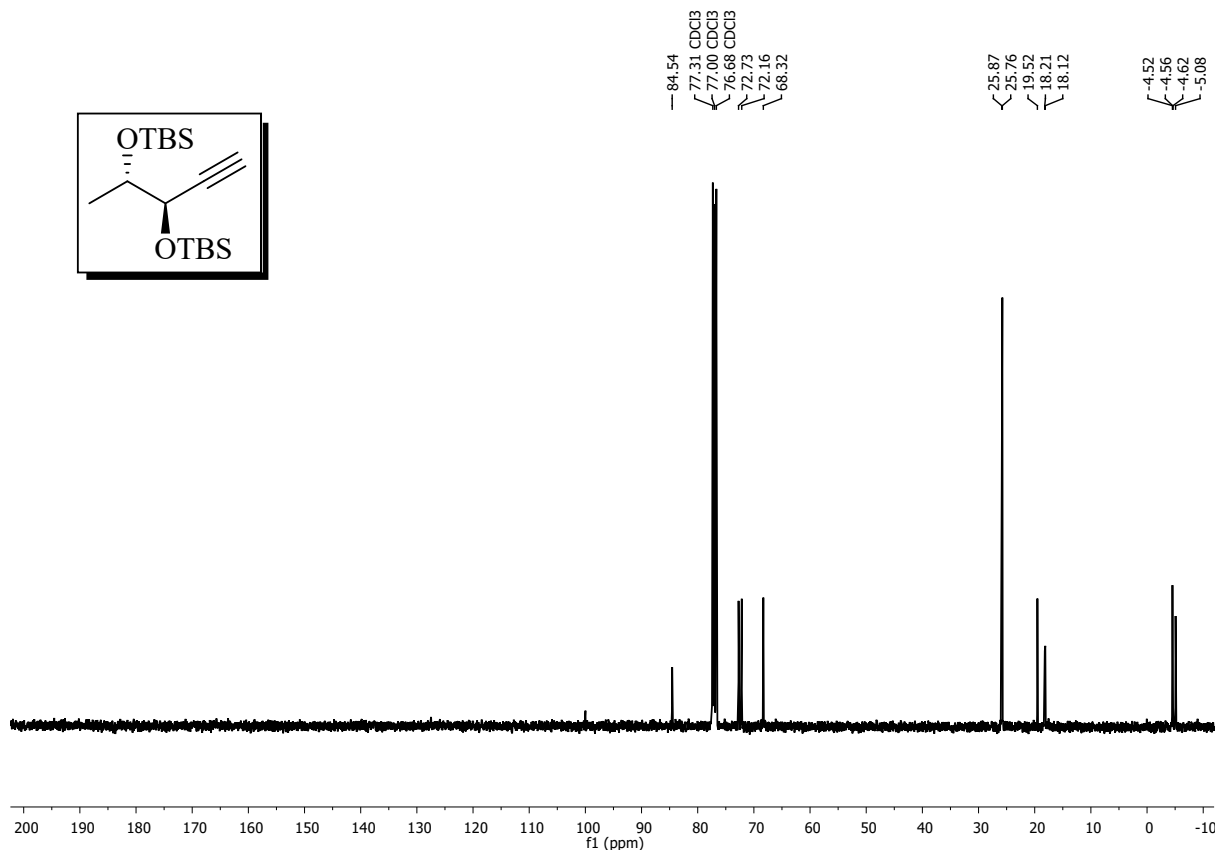

**DEPT (150 MHz) NMR of compound 7 in CDCl<sub>3</sub>**

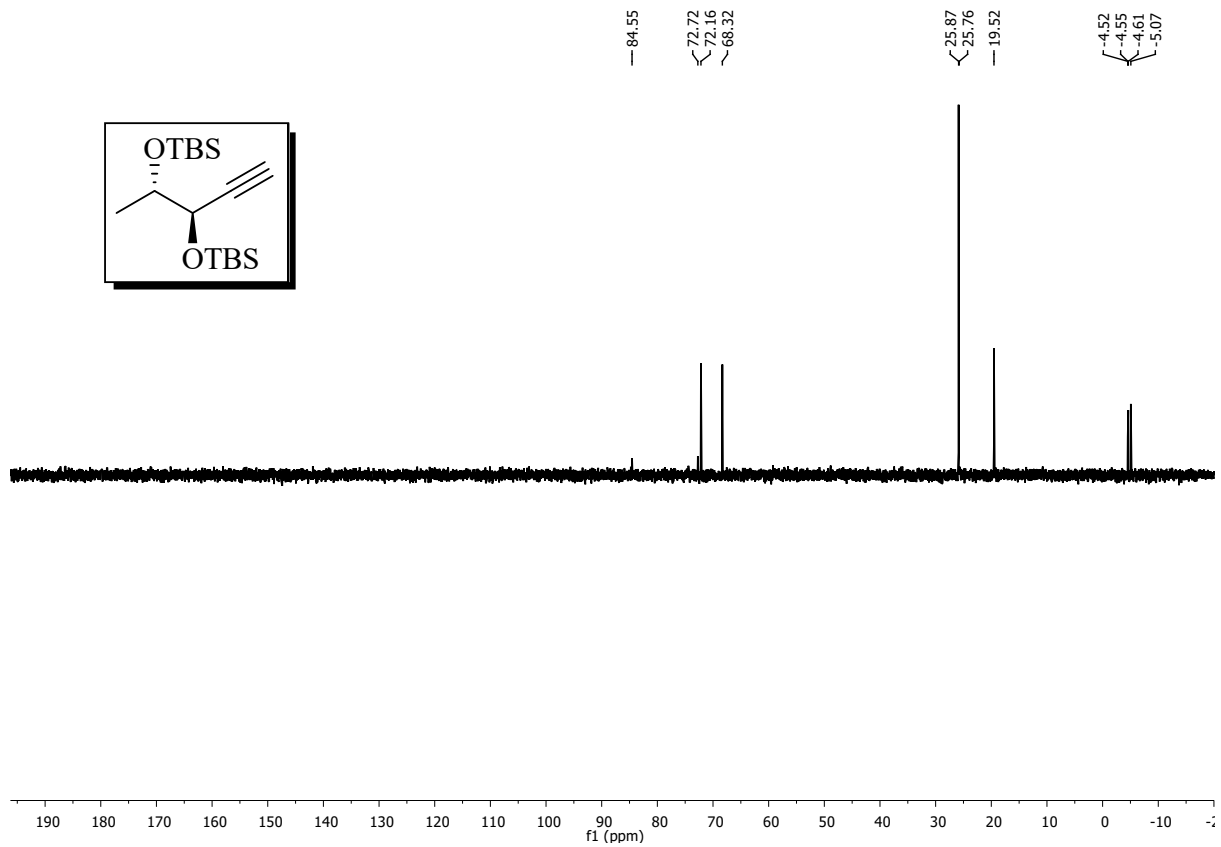

### $^1\text{H}$ (400 MHz) NMR of compound 13 in $\text{CDCl}_3$

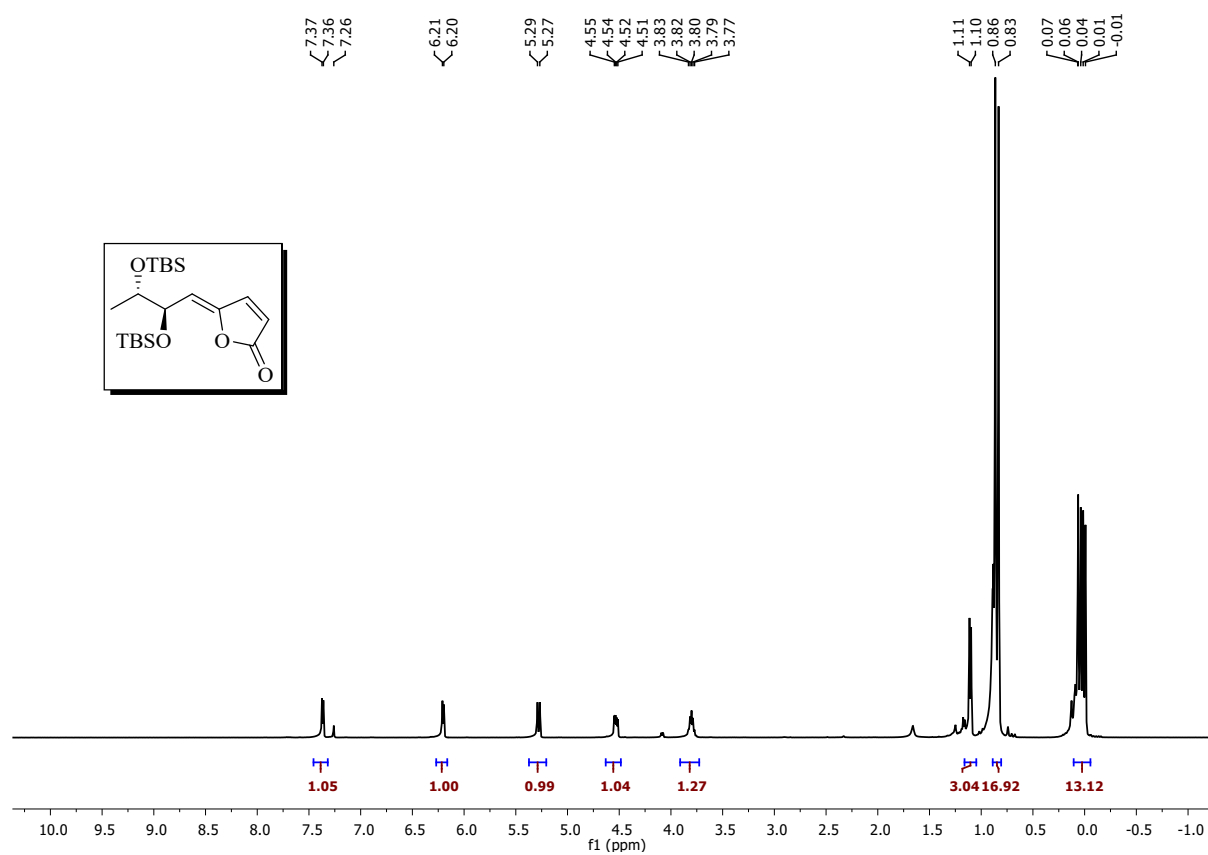

### $^{13}\text{C}$ (100 MHz) NMR of compound 13 in $\text{CDCl}_3$

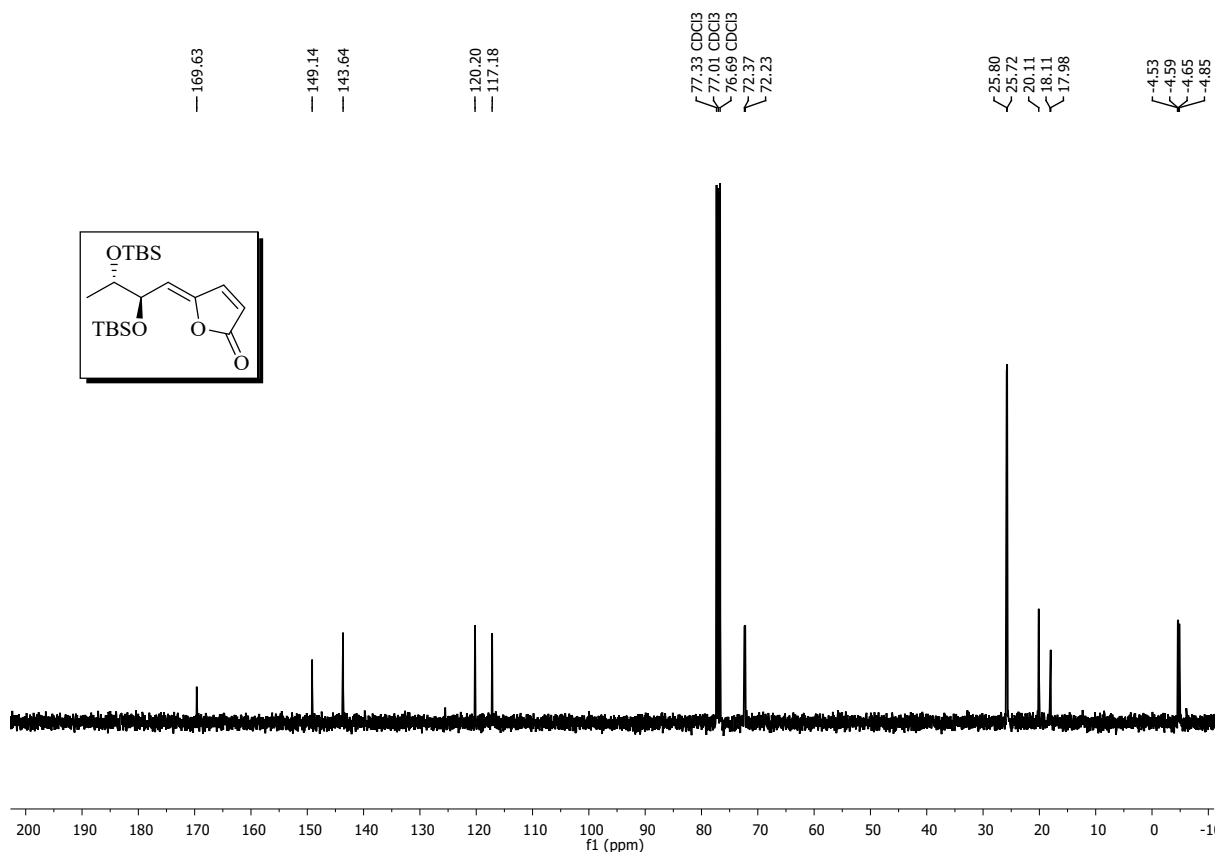

**DEPT (100 MHz) NMR of compound 13 in CDCl<sub>3</sub>**

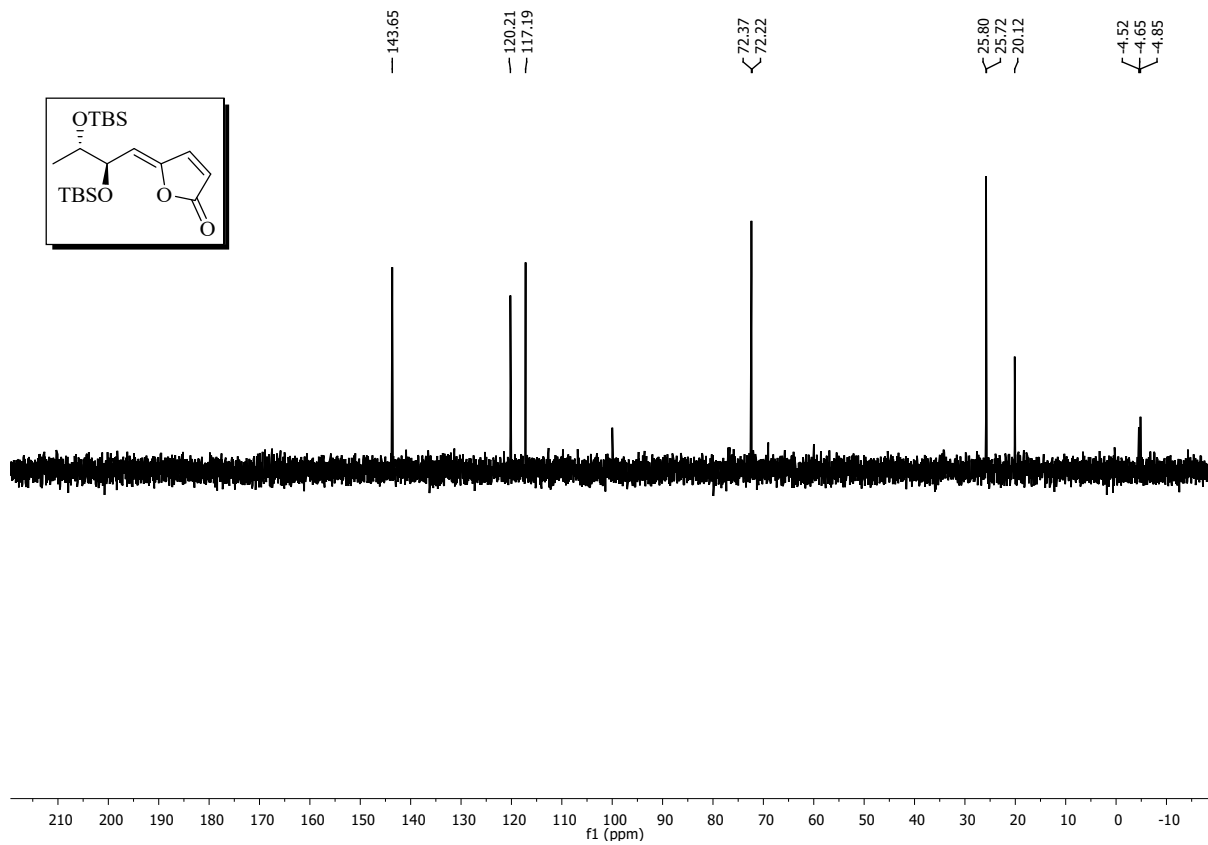

### $^1\text{H}$ NMR of versicolactone A (6) (600 MHz, $\text{DMSO-D}_6$ )

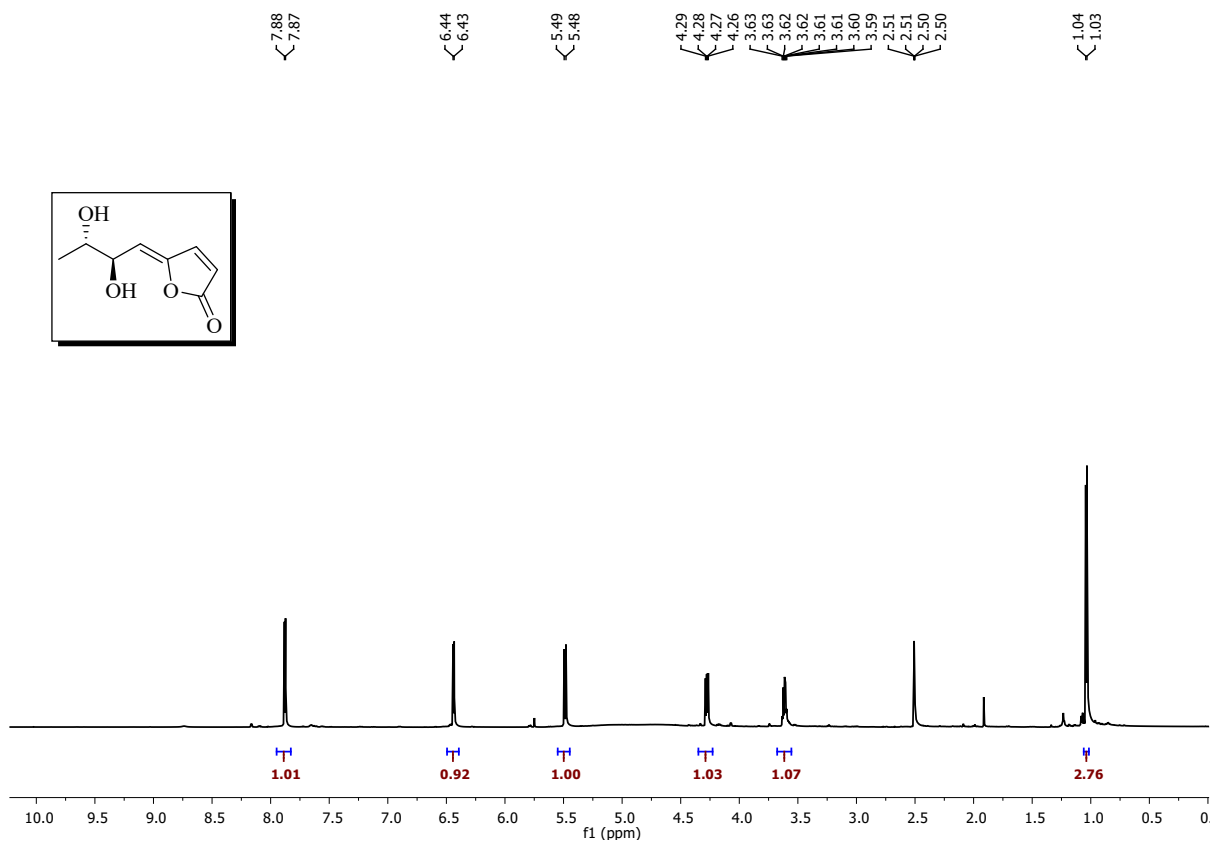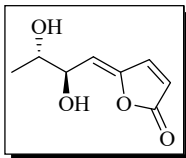

### $^{13}\text{C}$ NMR of versicolactone A (6) (150 MHz, $\text{DMSO-D}_6$ )

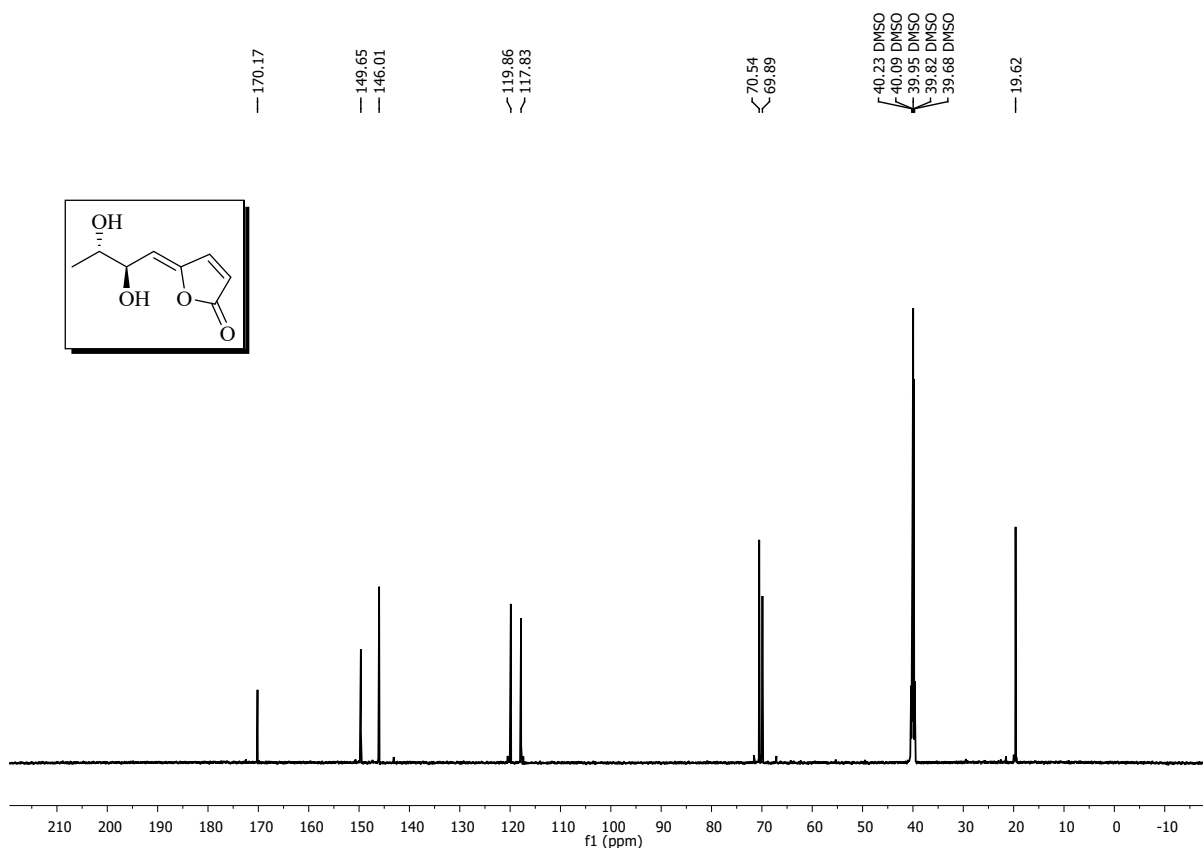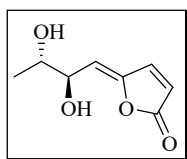

**DEPT-135- NMR of versicolactone A (6) (150 MHz, DMSO-D<sub>6</sub>)**

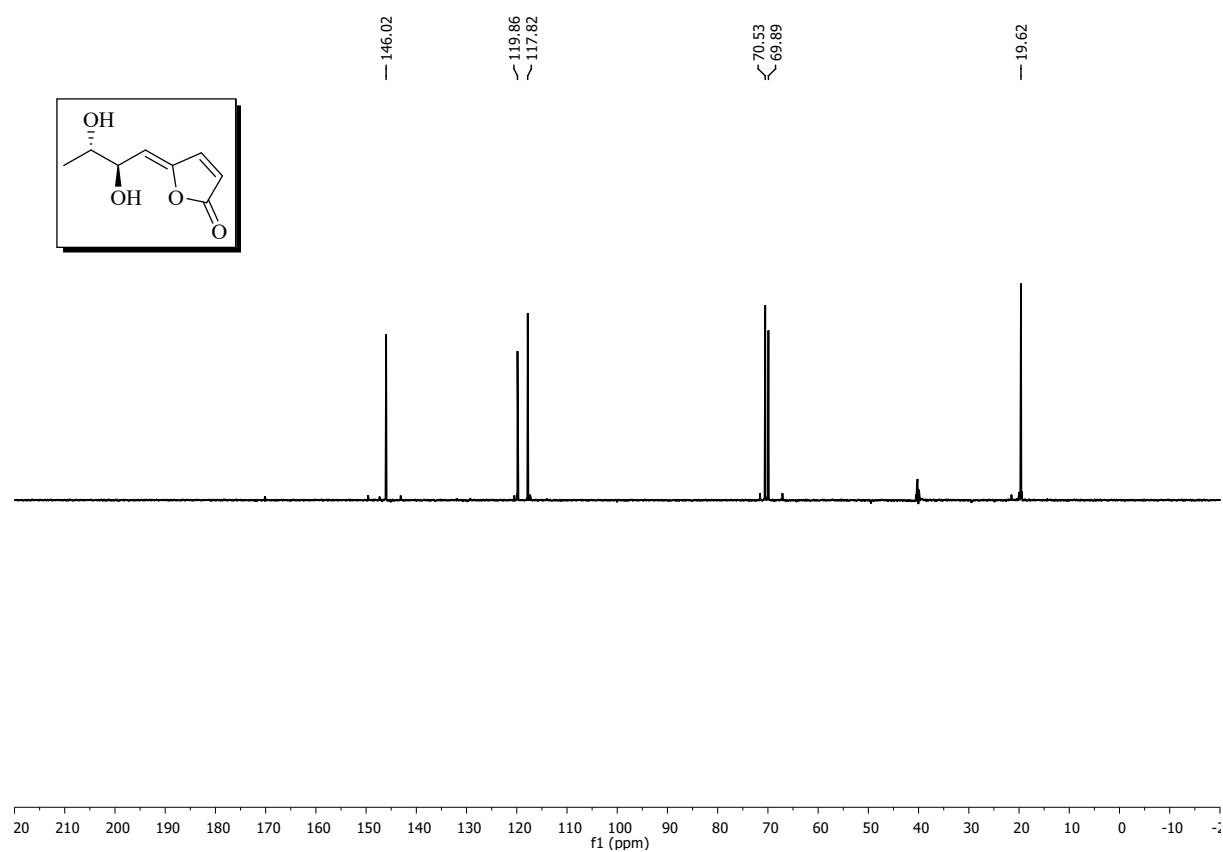

**<sup>1</sup>H NMR of versicolactone B (5) (600 MHz, DMSO-D<sub>6</sub>)**

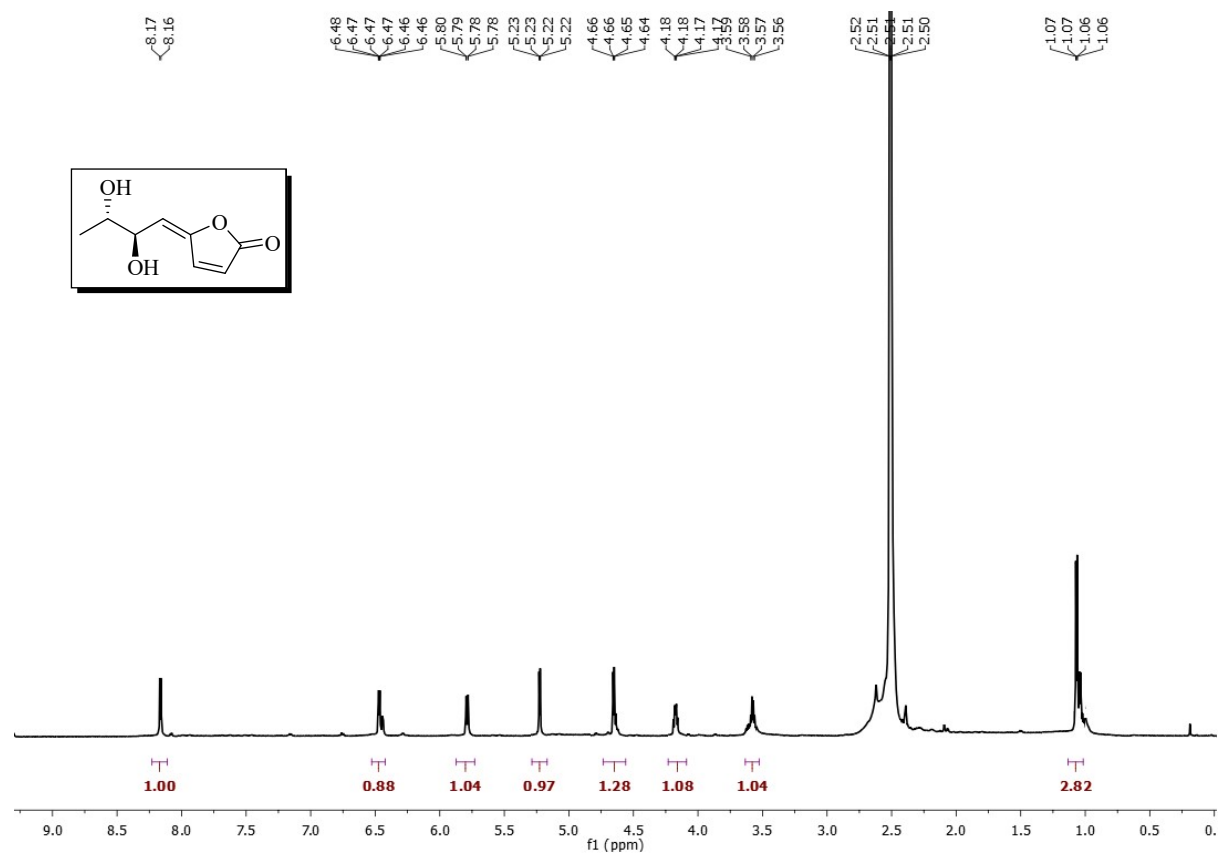



**$^{13}\text{C}$  NMR of versicolactone B (5) (150 MHz,  $\text{DMSO-}D_6$ )**

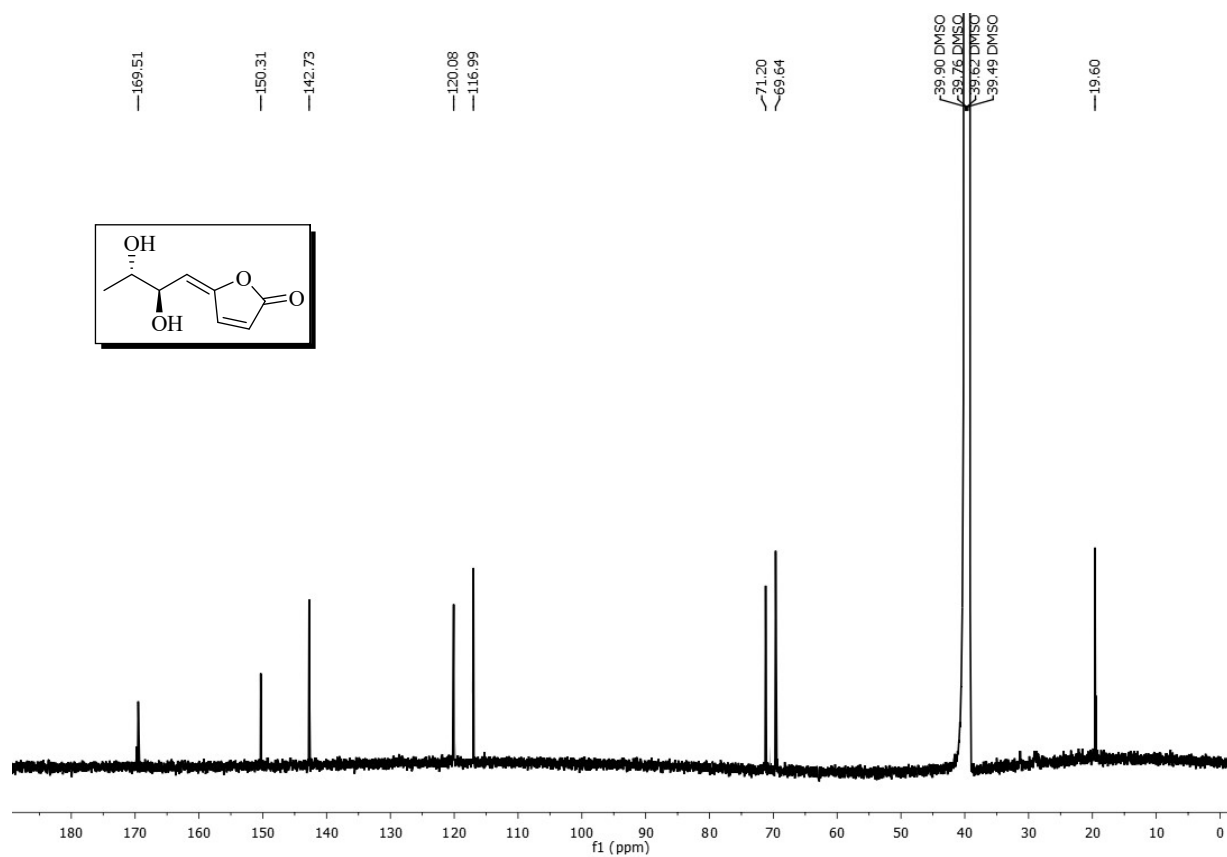

**$^1\text{H}$  (400 MHz) NMR of compound 18 in  $\text{CDCl}_3$**

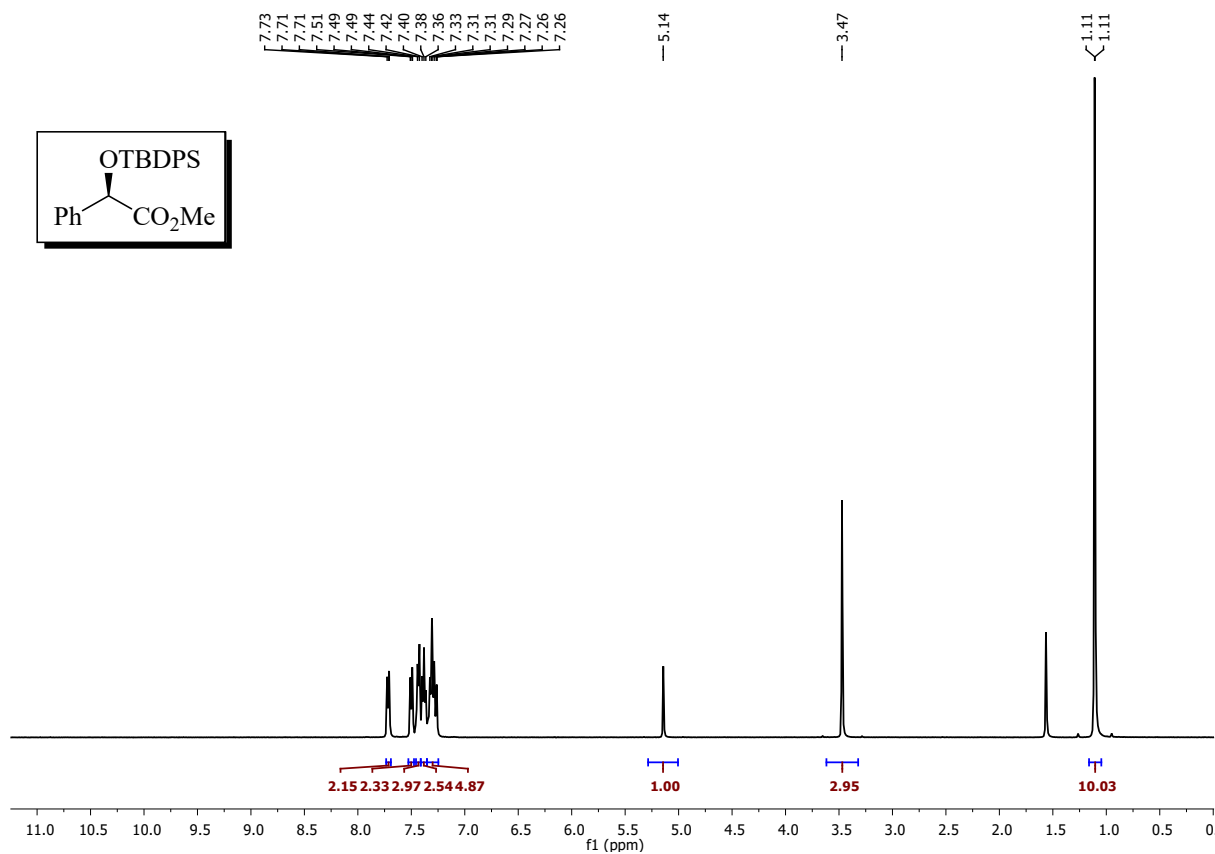

**<sup>13</sup>C (100 MHz) NMR of compound 18 in CDCl<sub>3</sub>**

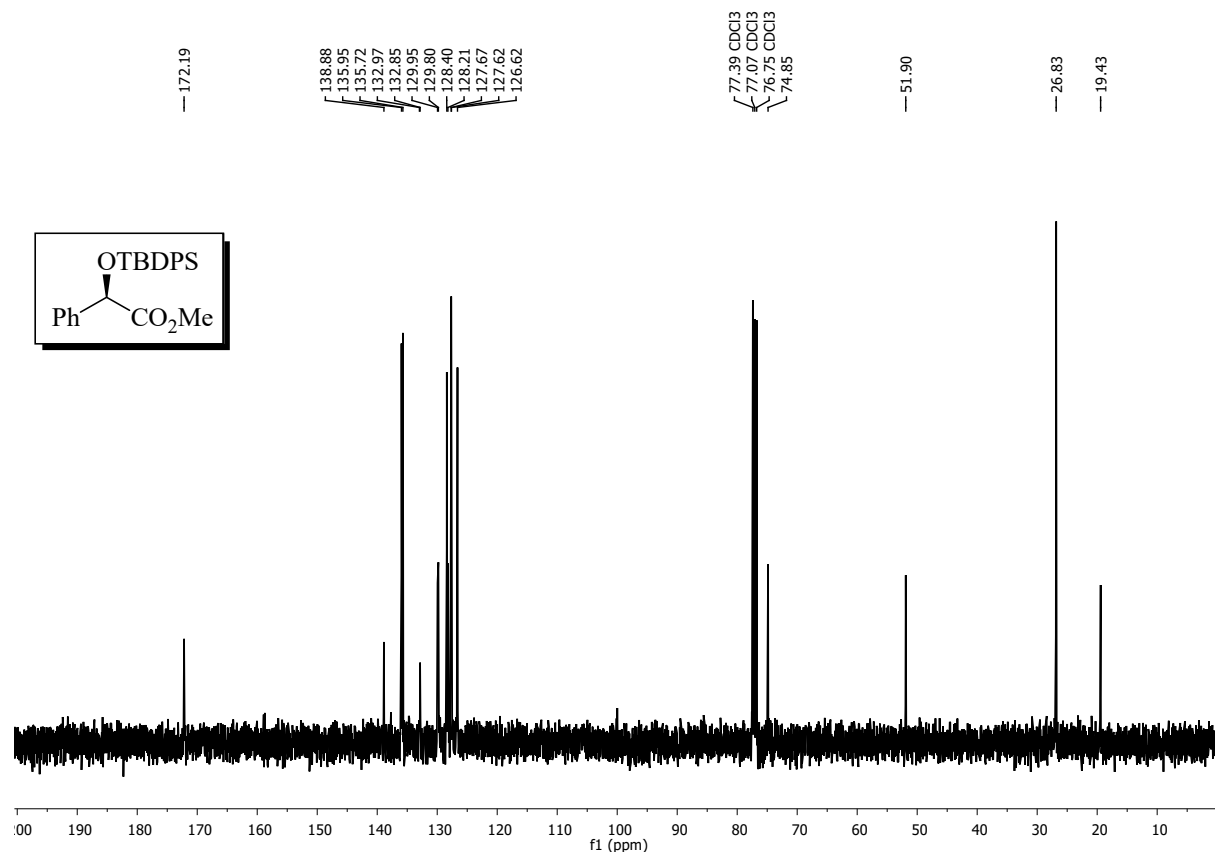

### DEPT (100 MHz) NMR of compound 18 in CDCl<sub>3</sub>

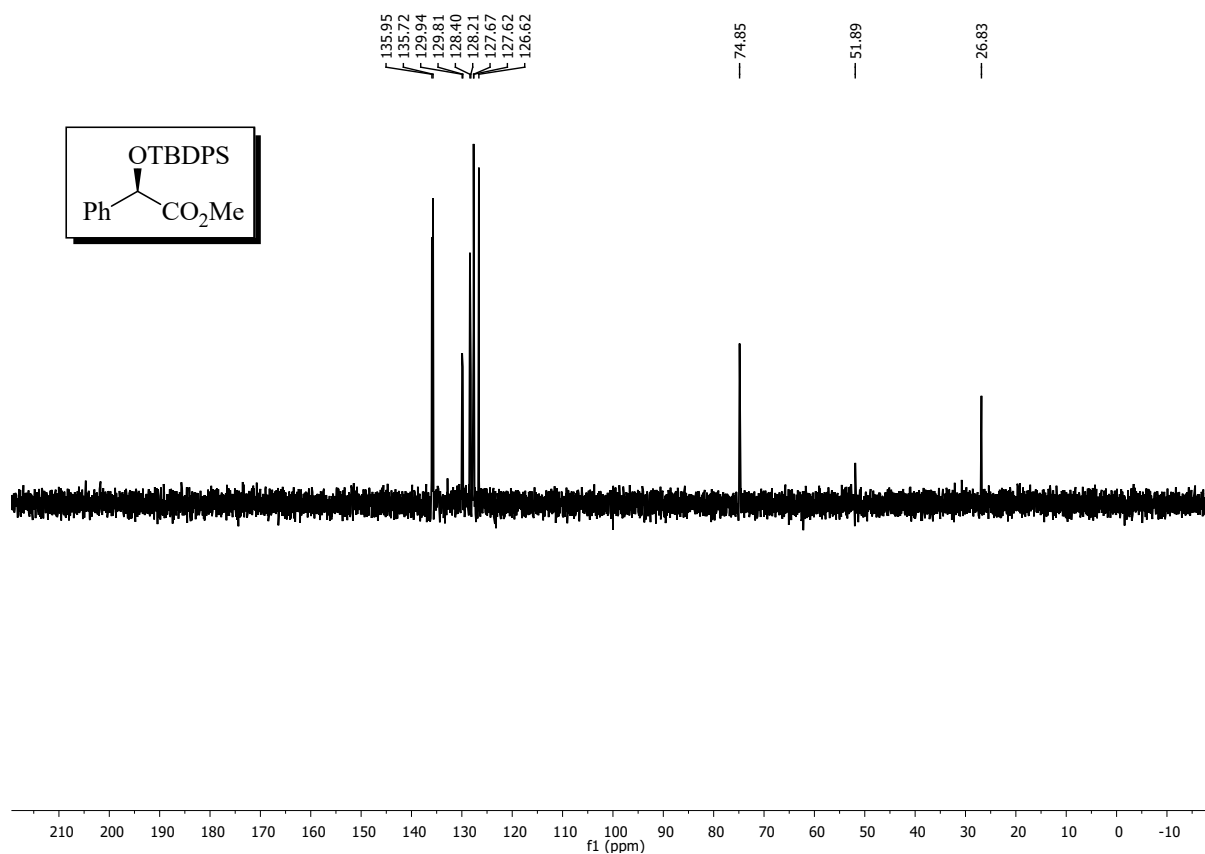

### <sup>1</sup>H (400 MHz) NMR of compound 17 in CDCl<sub>3</sub>

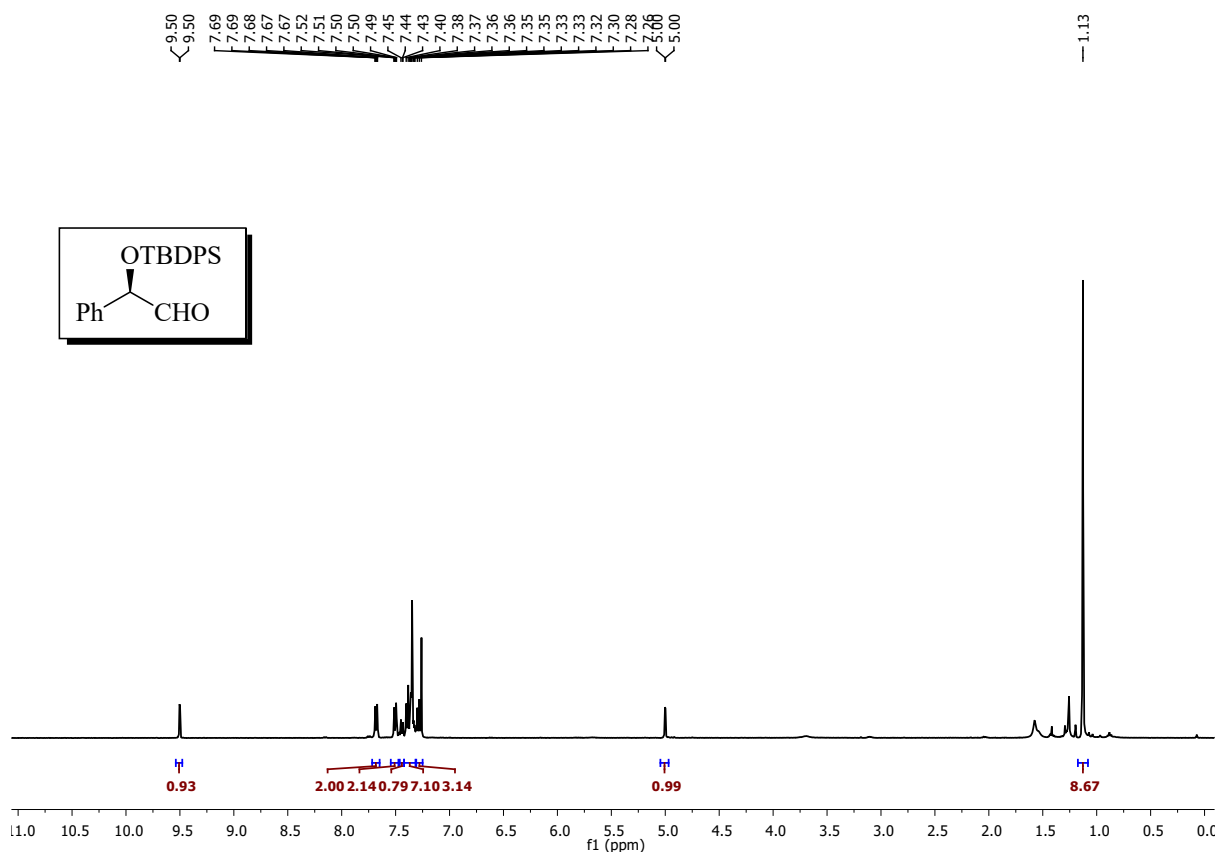





### $^{13}\text{C}$ (100 MHz) NMR of compound 16 in $\text{CDCl}_3$

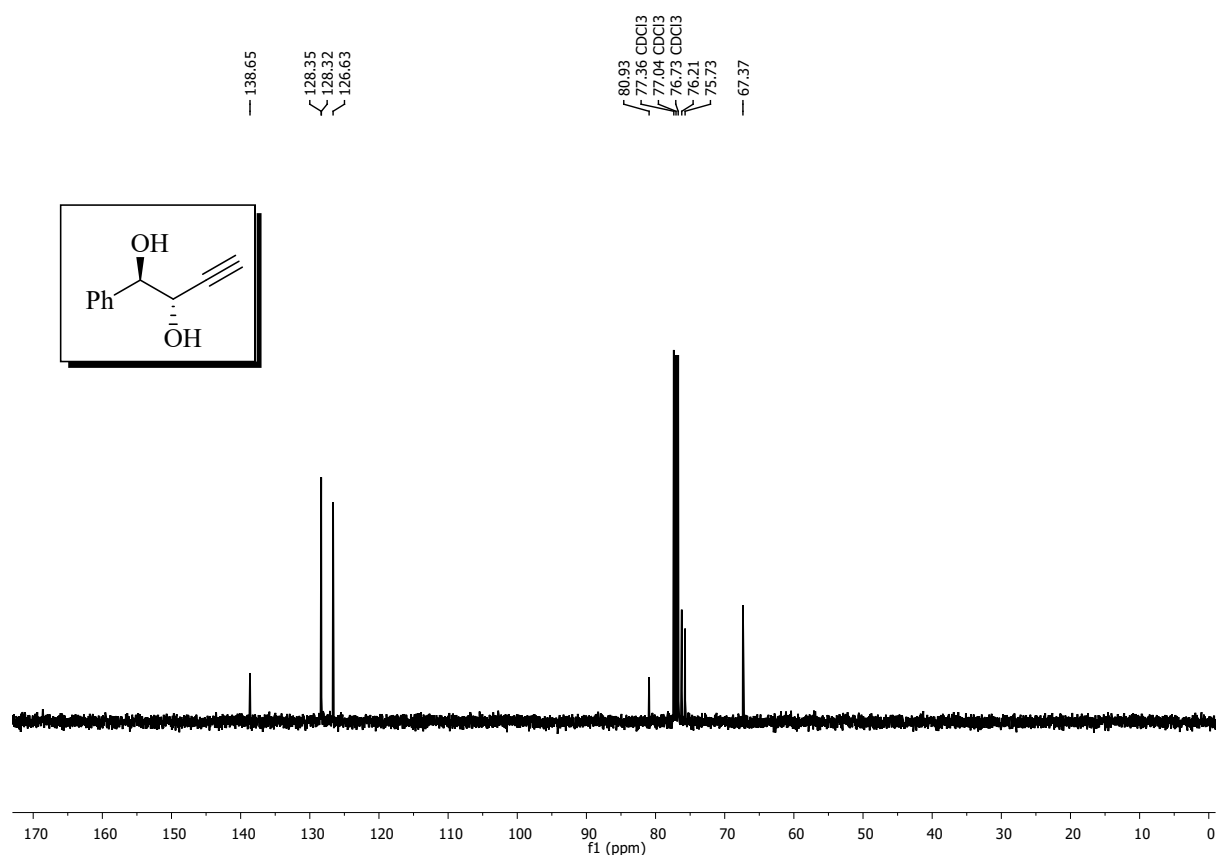

### DEPT (100 MHz) NMR of compound 16 in $\text{CDCl}_3$

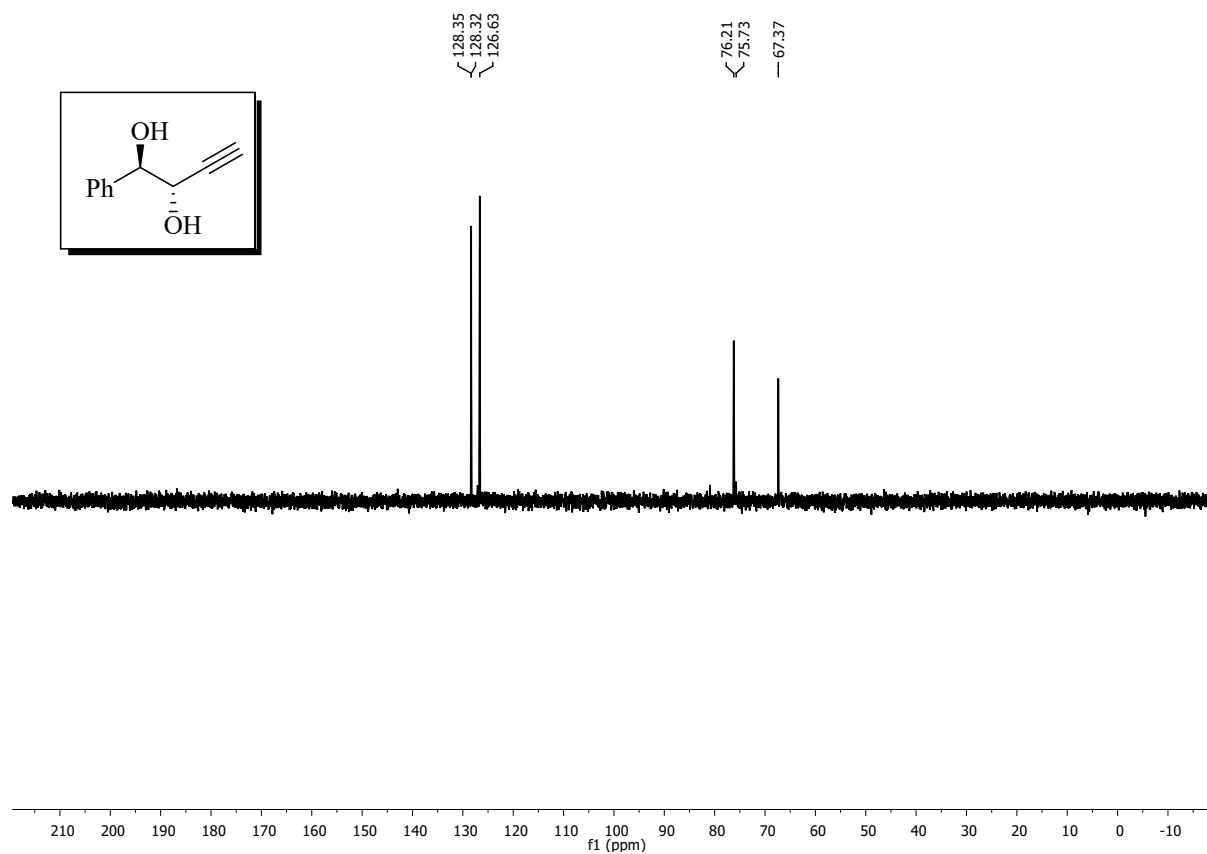

### $^1\text{H}$ NMR of goniobutenolide A (15) (400 MHz, $\text{CDCl}_3$ )

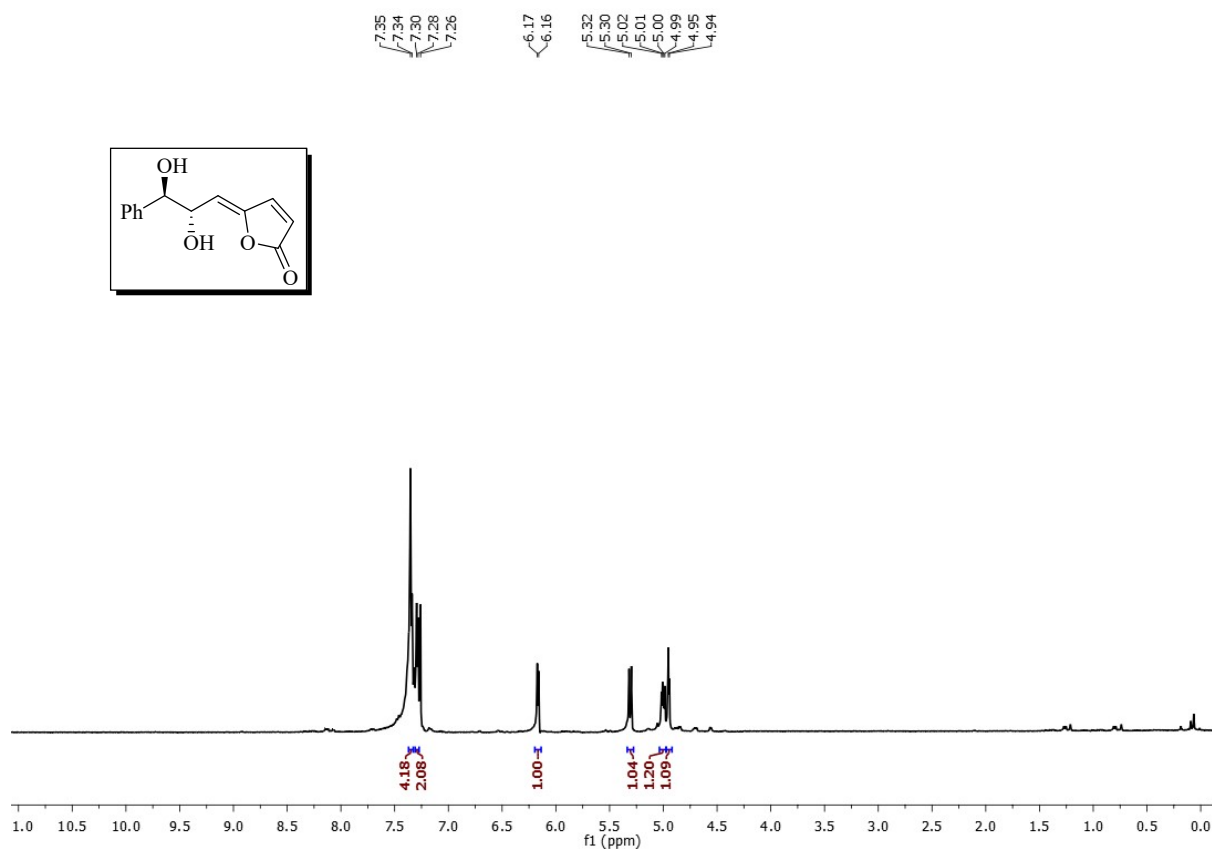

### $^{13}\text{C}$ NMR of goniobutenolide A(15) (100 MHz, $\text{CDCl}_3$ )

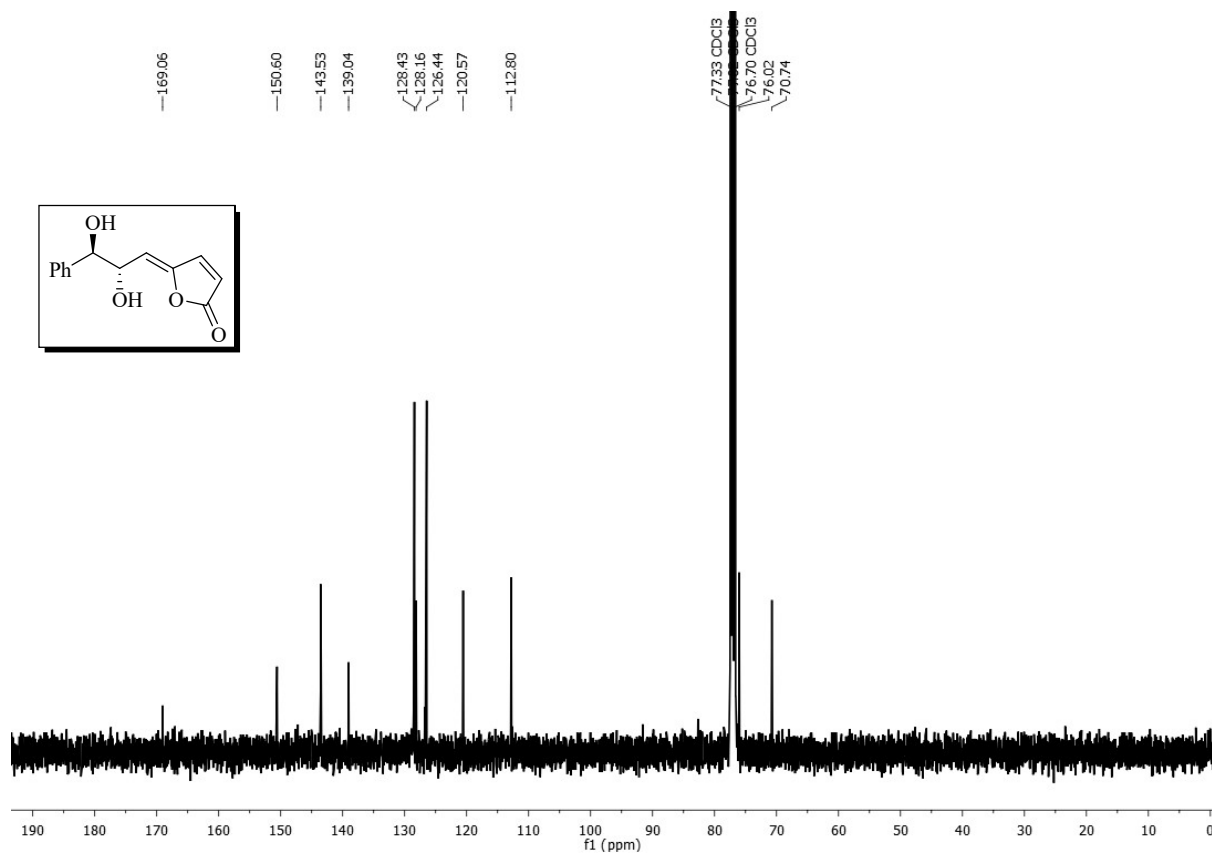

### $^1\text{H}$ NMR of goniobutenolide B (14) (400 MHz, $\text{CDCl}_3$ )

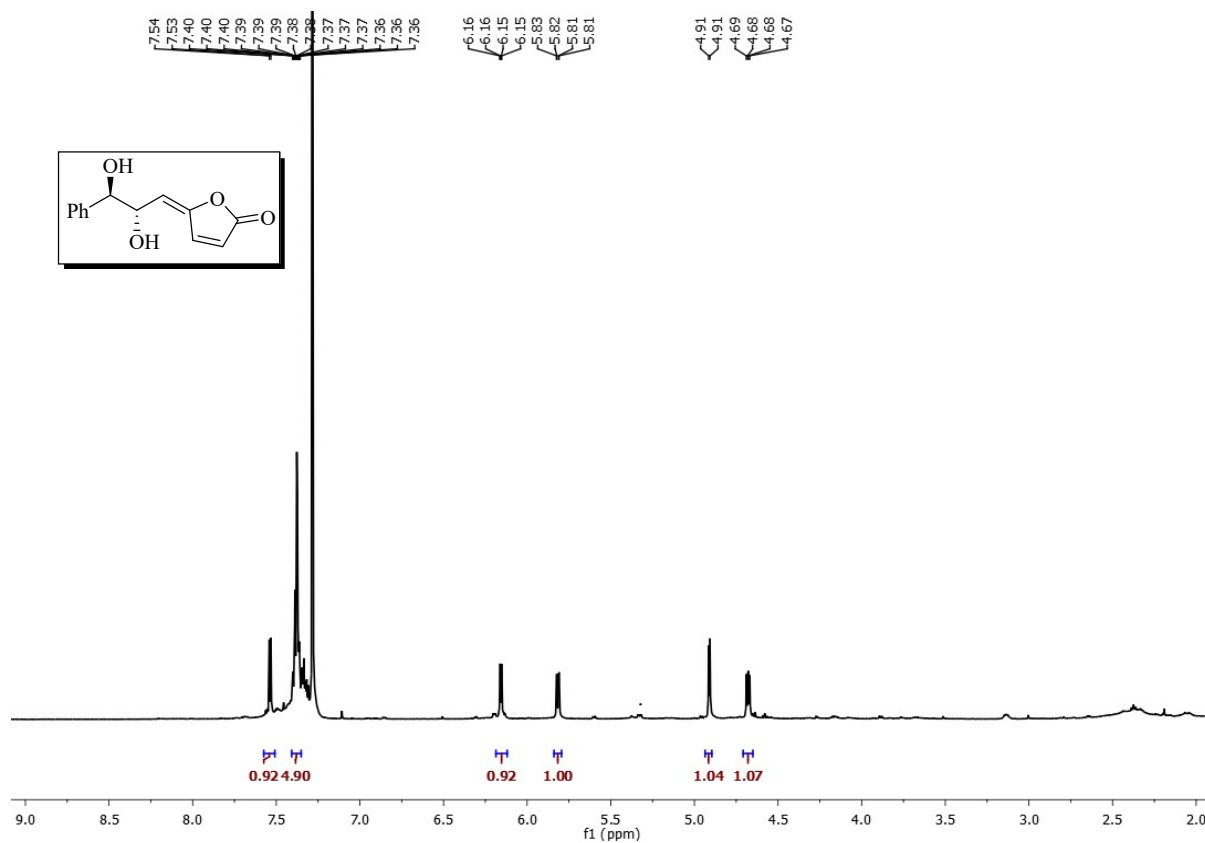

### $^{13}\text{C}$ NMR of goniobutenolide B (14) (150 MHz, $\text{CDCl}_3$ )

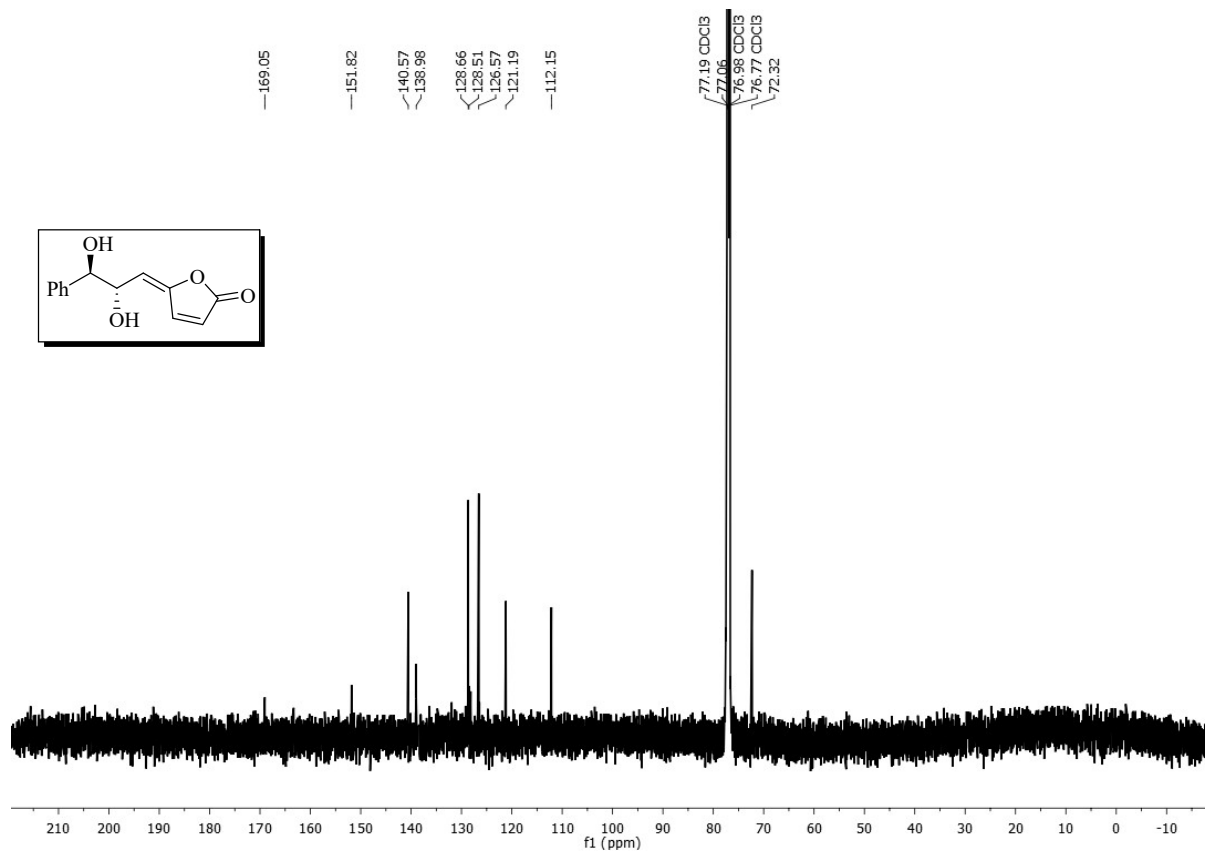



**DEPT (150 MHz) NMR of goniobutenolide B (14) in CDCl<sub>3</sub>**

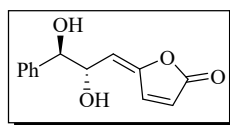

— 140.57  
— 128.66  
— 128.51  
— 128.56  
— 121.19  
— 112.14  
— 77.06  
— 72.32

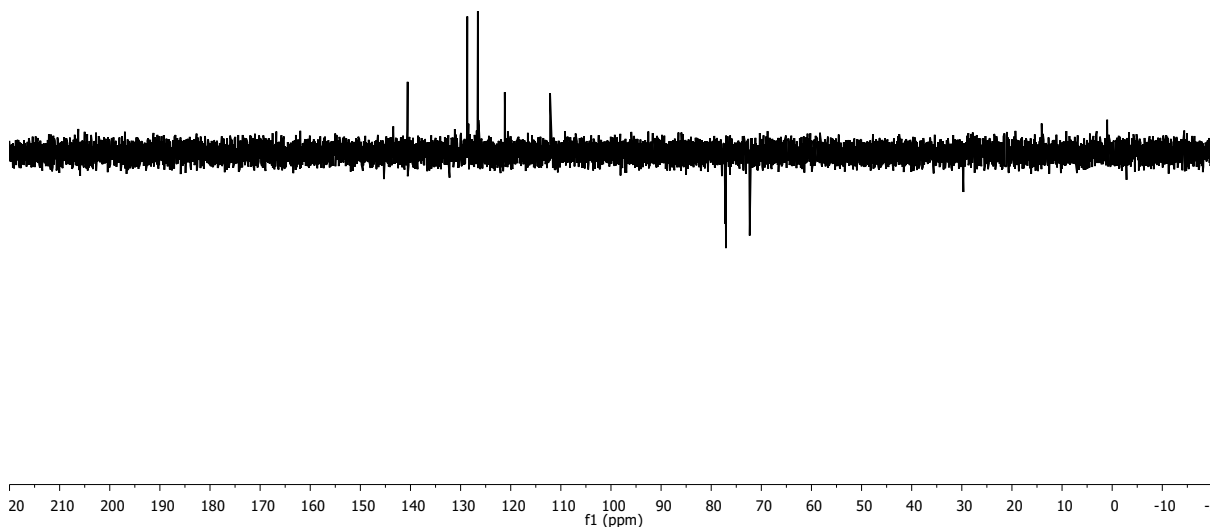

**<sup>1</sup>H (400 MHz) NMR of compound 26 in CDCl<sub>3</sub>**

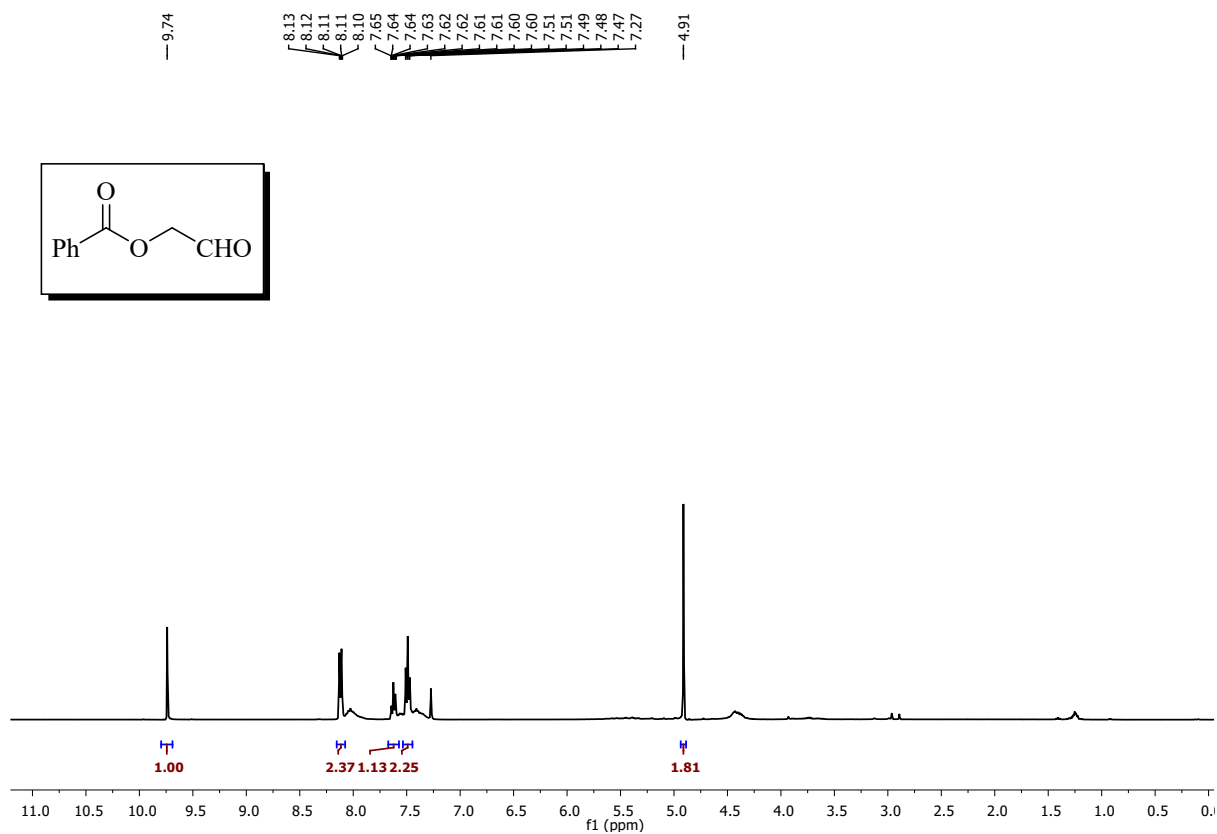

**<sup>13</sup>C (100 MHz) NMR of compound 26 in CDCl<sub>3</sub>**

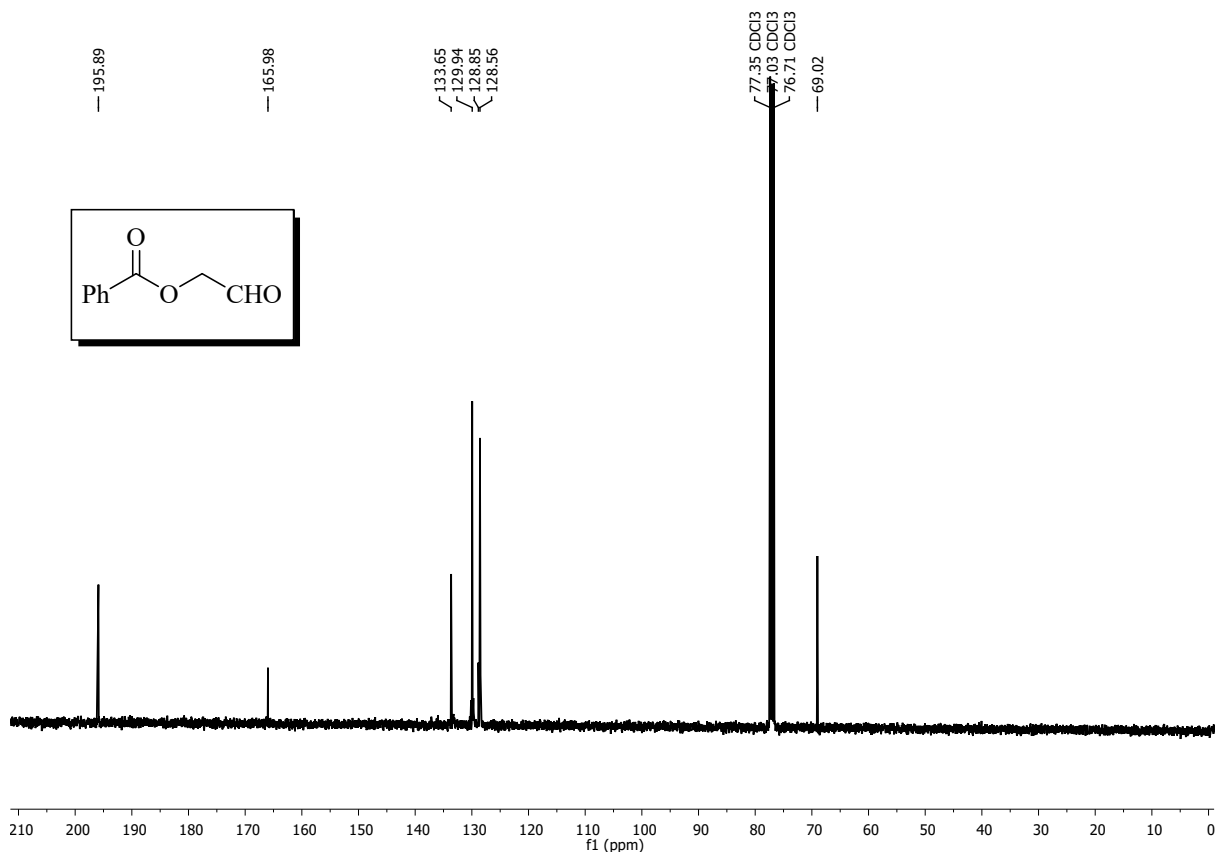

**DEPT (100 MHz) NMR of compound 26 in CDCl<sub>3</sub>**

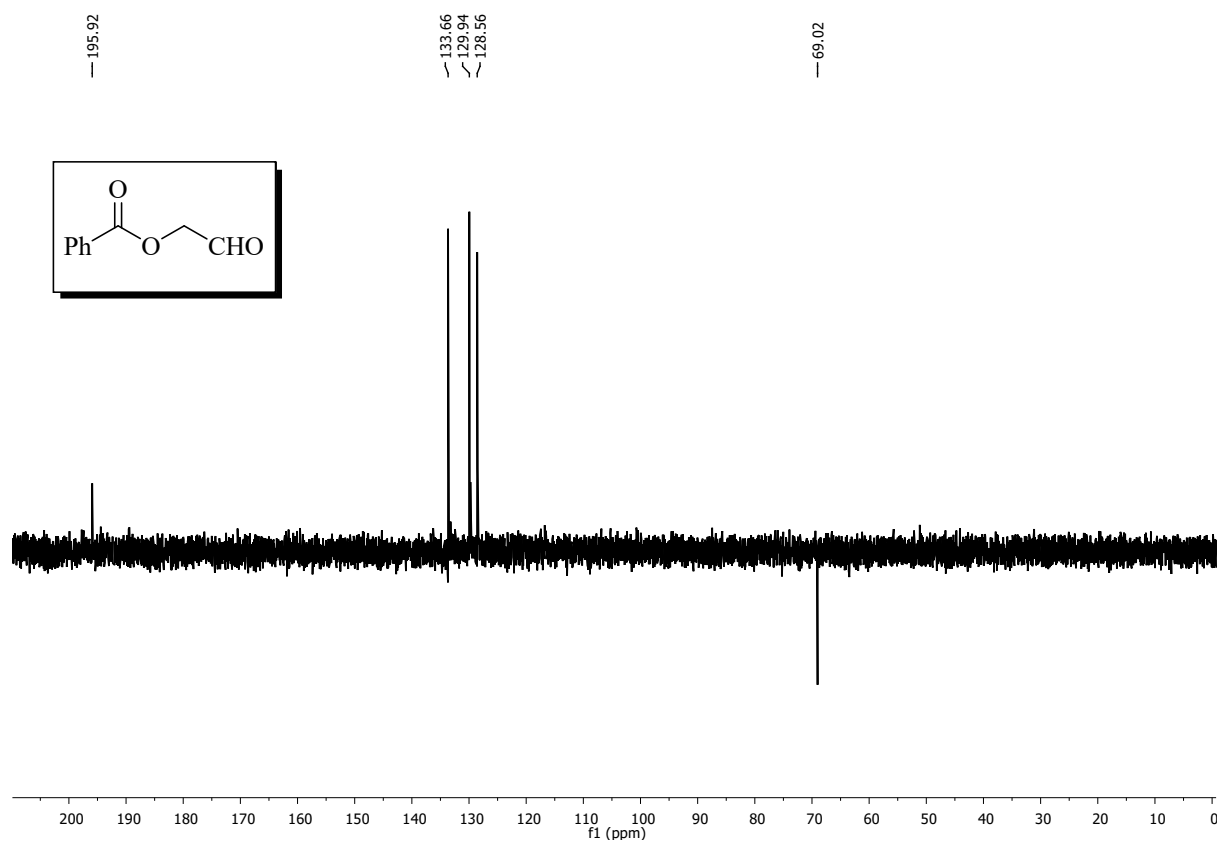

**<sup>1</sup>H (400 MHz) NMR of compound 27 in CDCl<sub>3</sub>**

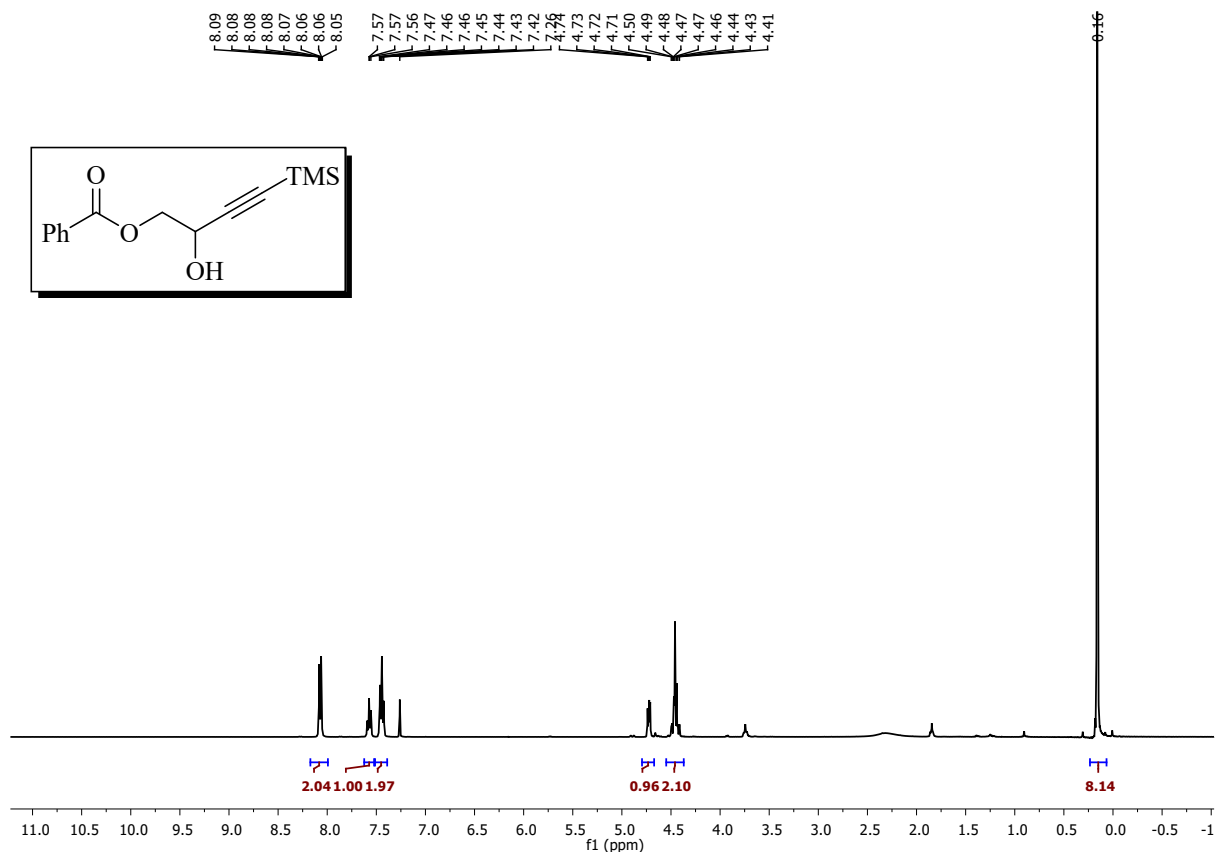

**<sup>13</sup>C (100 MHz) NMR of compound 27 in CDCl<sub>3</sub>**

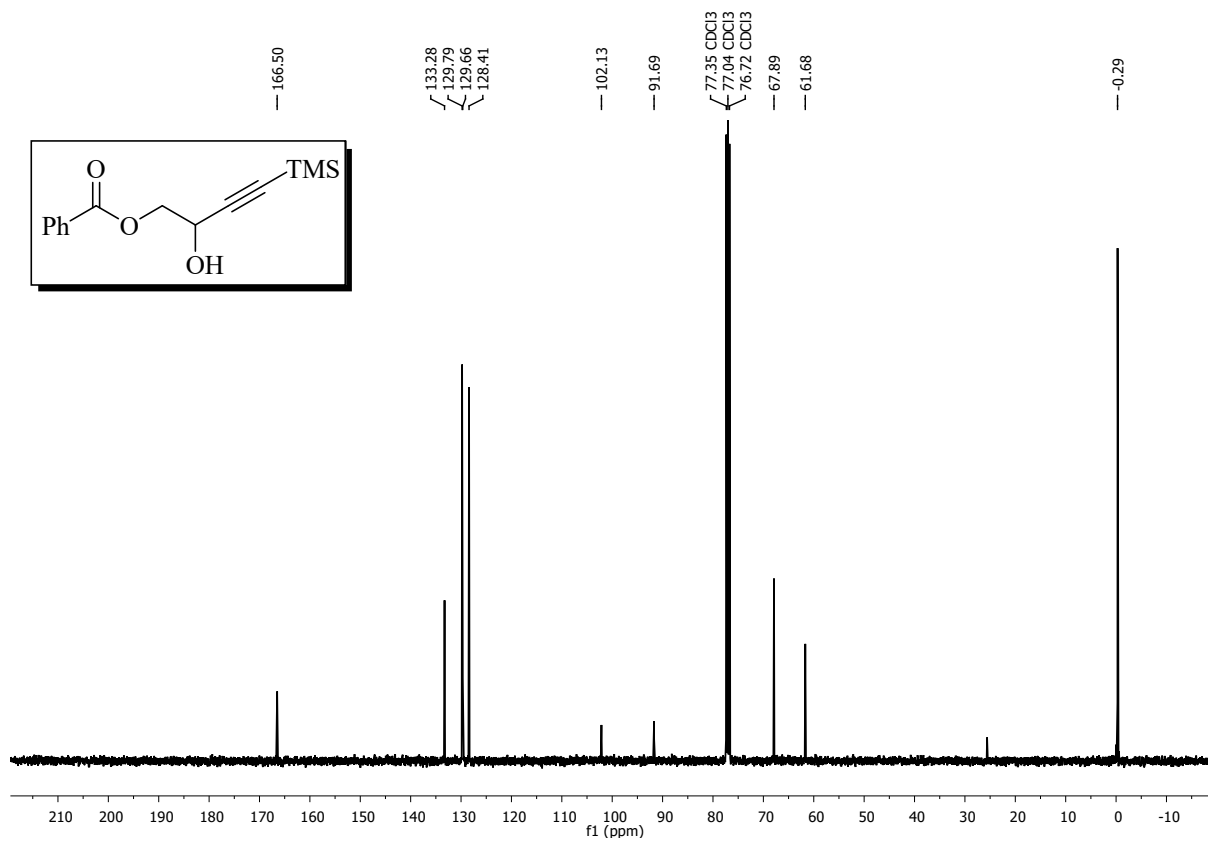

DEPT (100 MHz) NMR of compound 27 in CDCl<sub>3</sub>

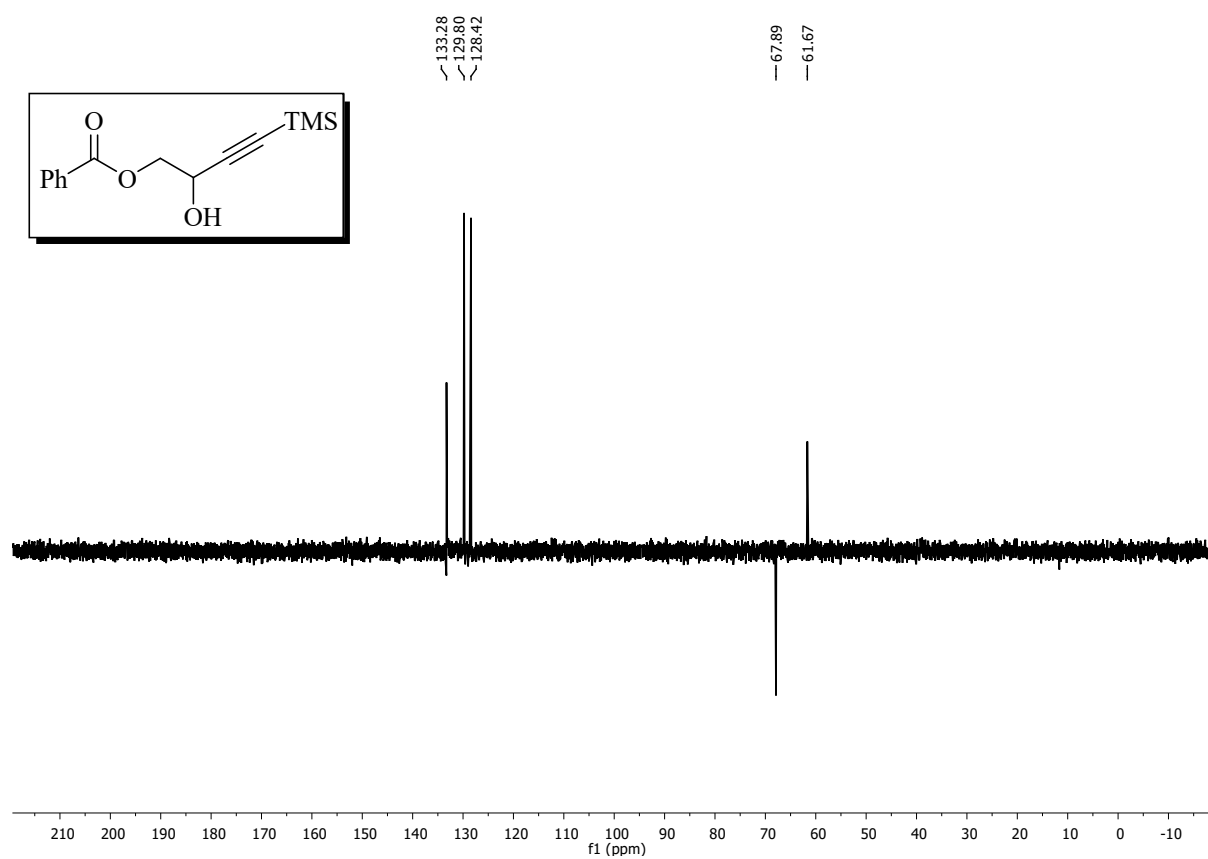

<sup>1</sup>H (400 MHz) NMR of compound (S)-25 in CDCl<sub>3</sub>

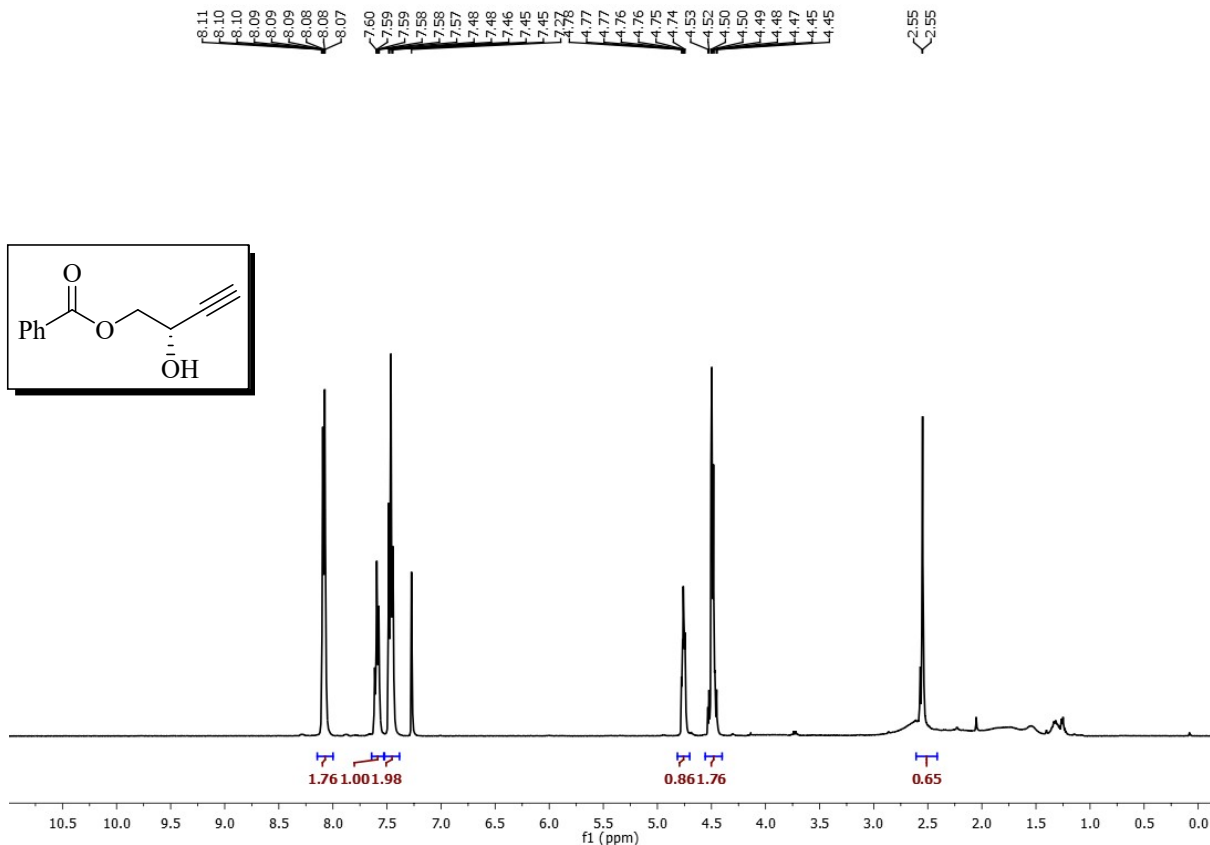

<sup>13</sup>C (100 MHz) NMR of compound (S)-25 in CDCl<sub>3</sub>

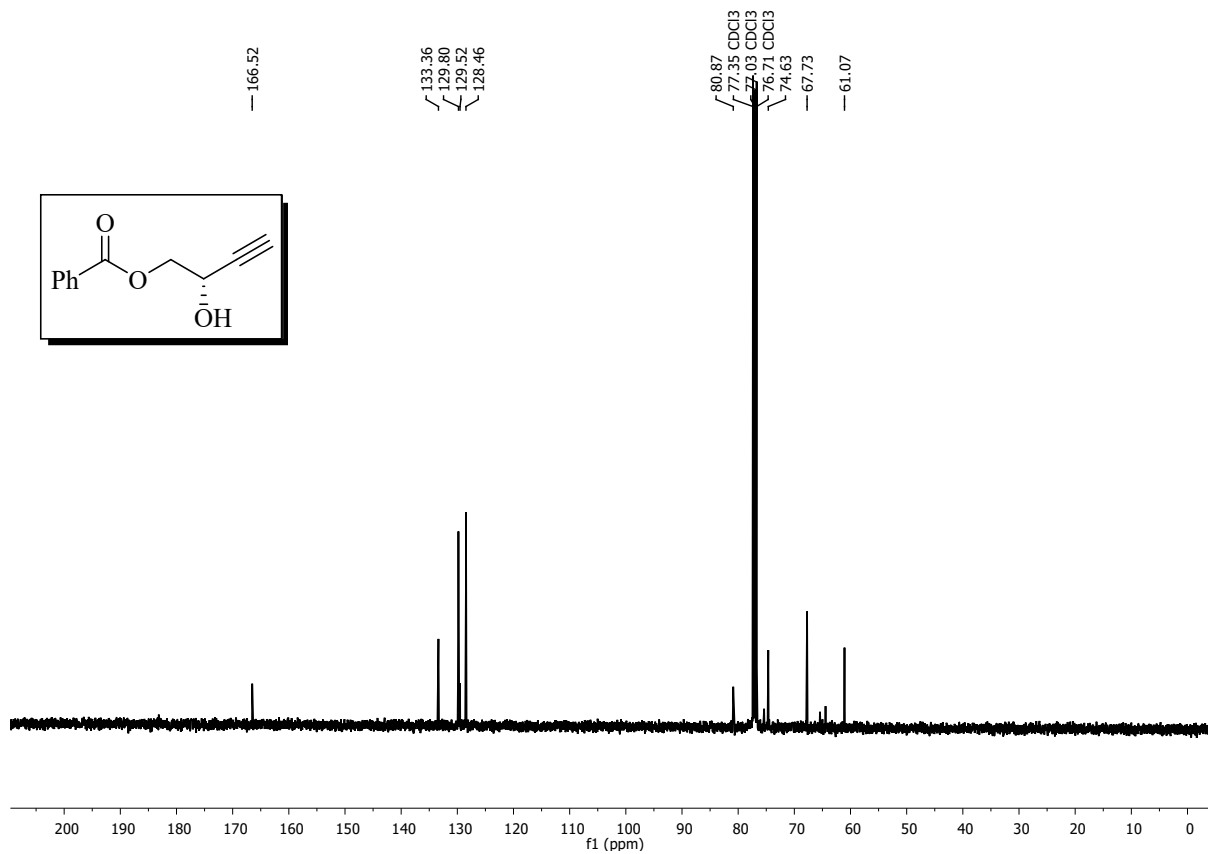

DEPT (100 MHz) NMR of compound (S)-25 in CDCl<sub>3</sub>

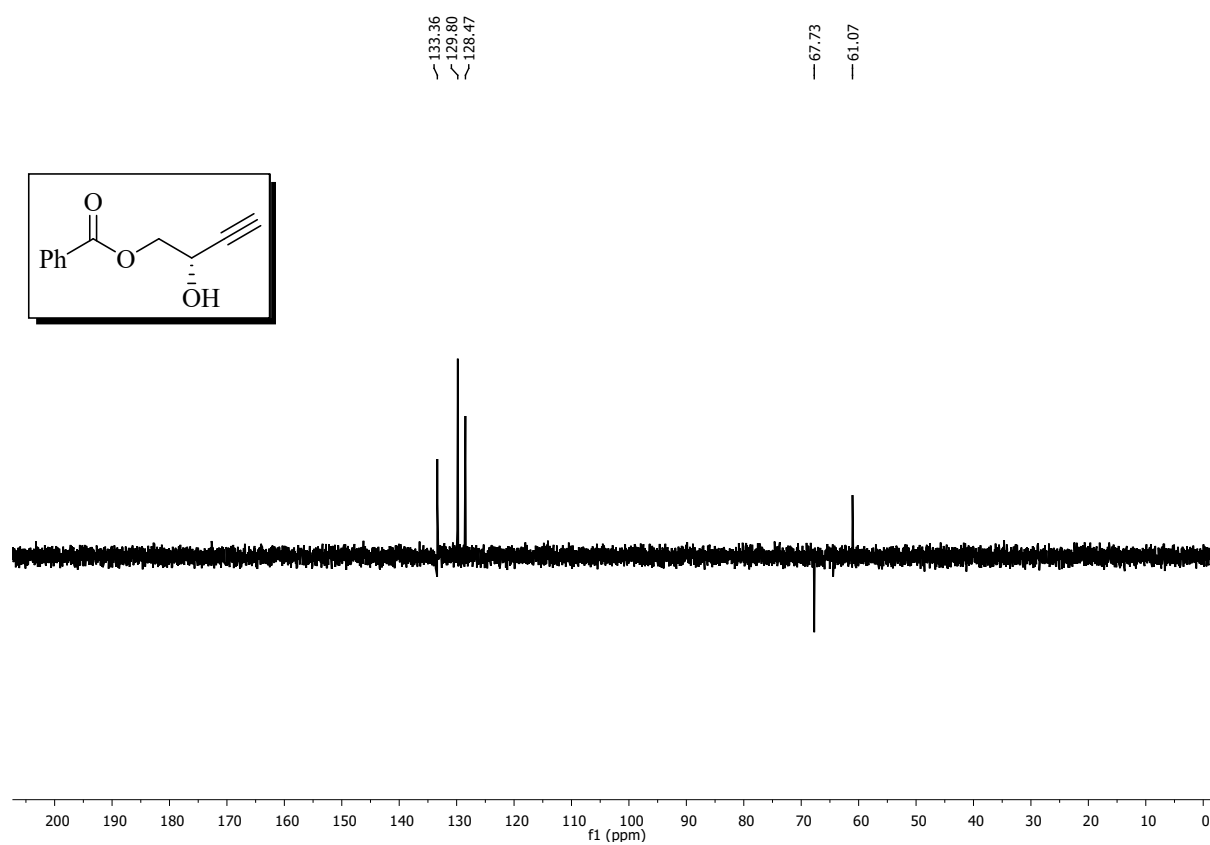

<sup>1</sup>H NMR of Z-melodorinol (24) (400 MHz, CDCl<sub>3</sub>)

8.09  
8.07  
8.06  
8.04  
8.04  
7.58  
7.48  
7.47  
7.45  
7.44  
7.43  
7.41  
7.39  
7.28  
6.27  
6.26  
5.43  
5.41  
5.21  
5.20  
5.19  
5.18  
5.18  
4.50  
4.49  
4.48  
4.47  
4.47

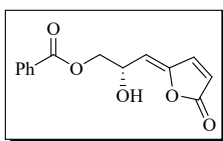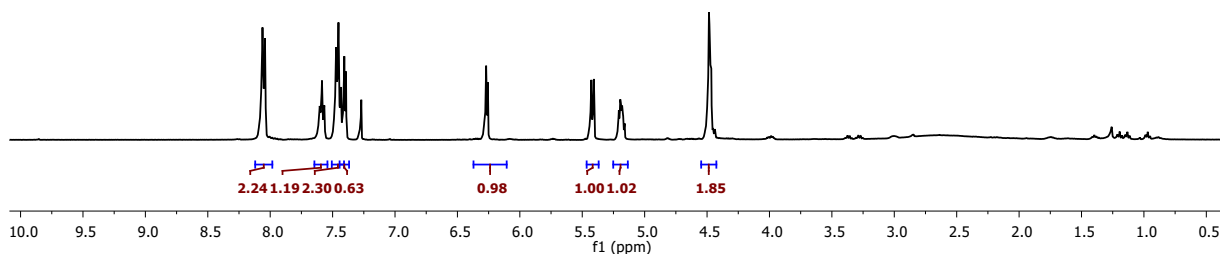

### <sup>13</sup>C NMR of Z-melodorinol (24) (100 MHz, CDCl<sub>3</sub>)

169.12  
166.94  
150.28  
143.87  
133.61  
129.98  
129.75  
128.72  
121.32  
113.38

77.59 CDCl<sub>3</sub>  
77.56 CDCl<sub>3</sub>  
76.96 CDCl<sub>3</sub>  
67.76  
66.10

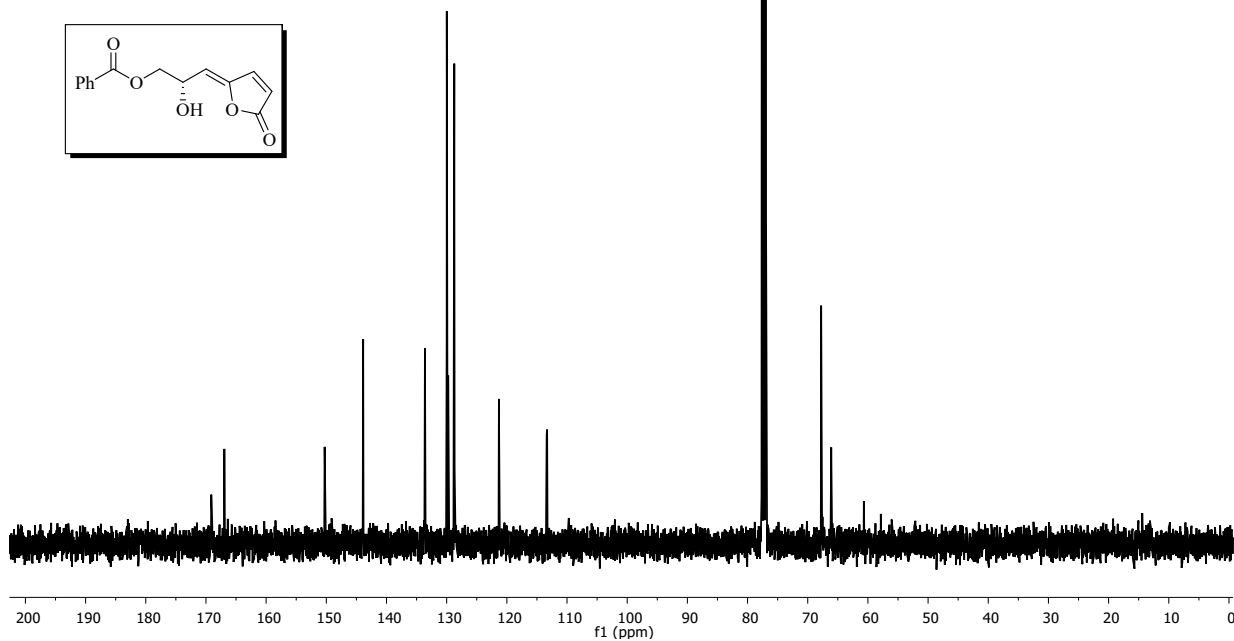

### DEPT-135- NMR of Z-melodorinol (24) (100 MHz, CDCl<sub>3</sub>)



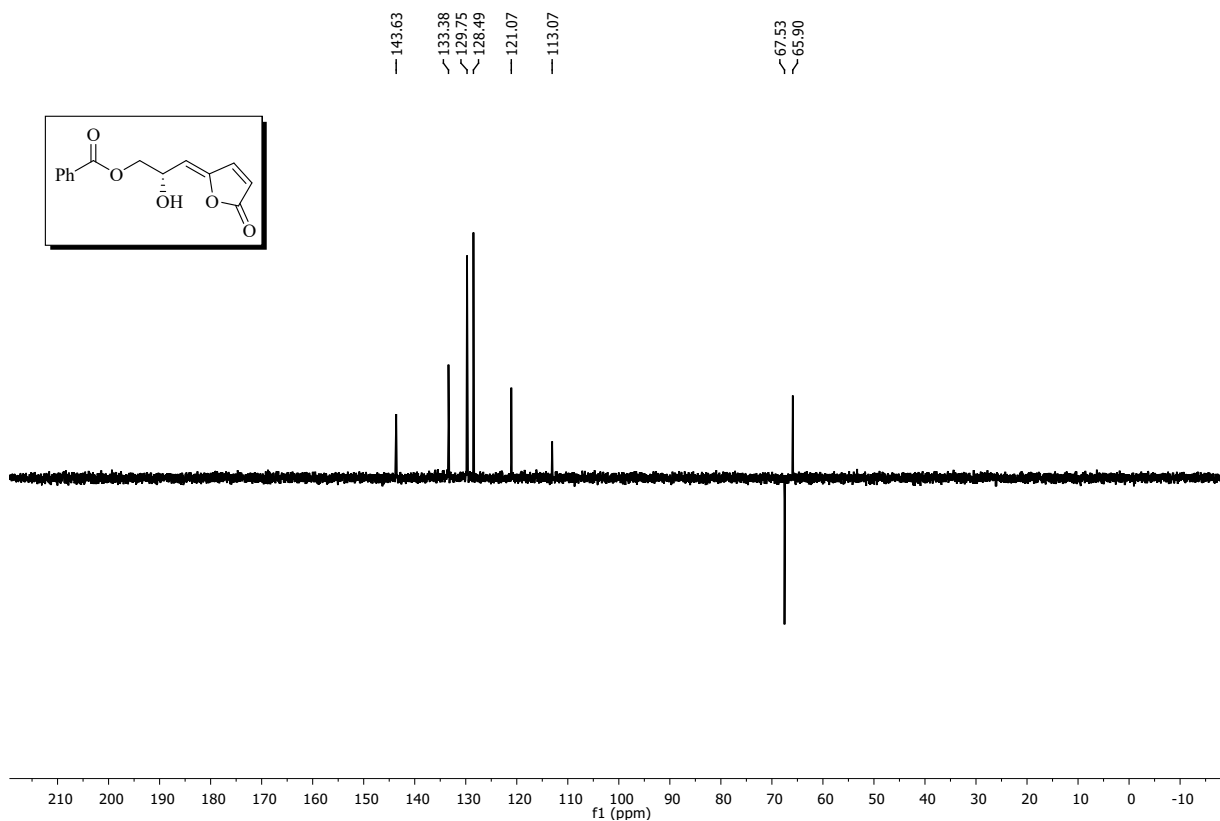

**<sup>1</sup>H NMR of *E*-melodorinol (23) (400 MHz, CDCl<sub>3</sub>)**

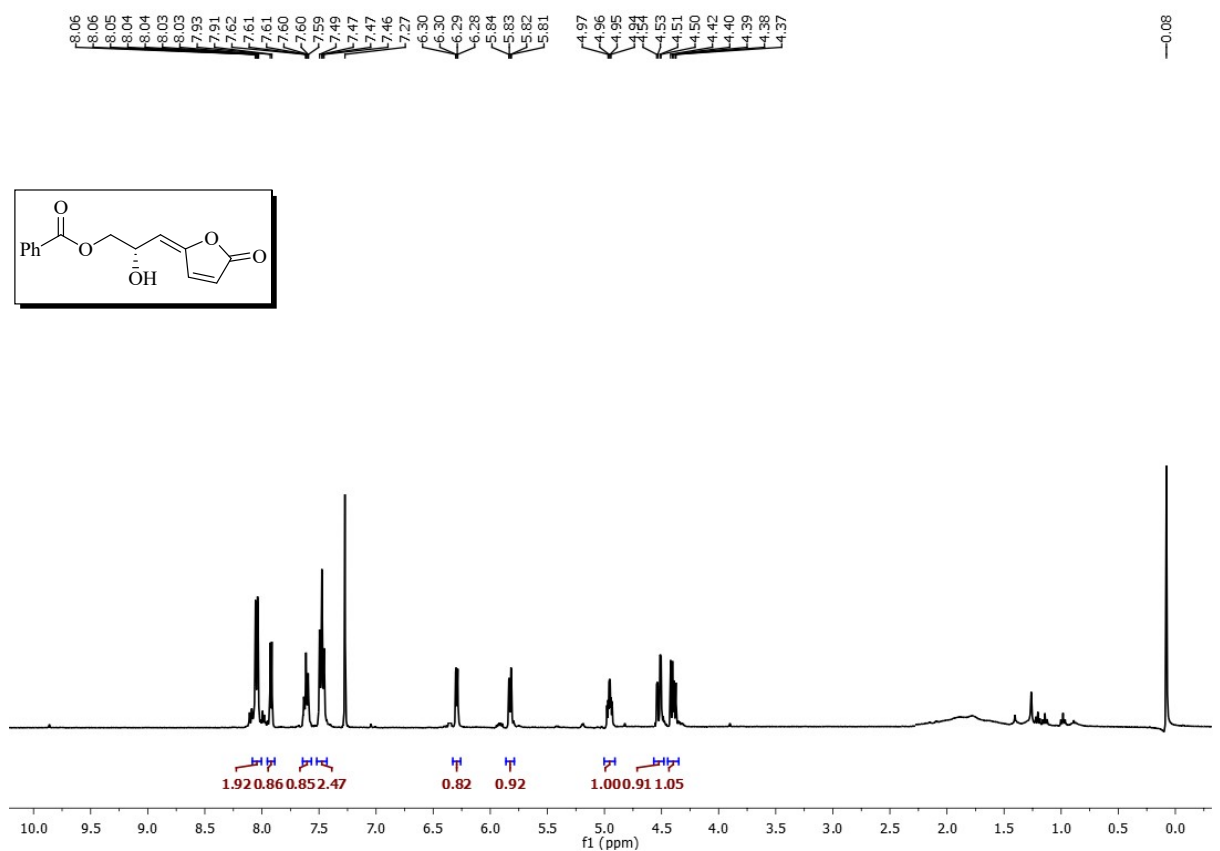

**<sup>13</sup>C NMR of *E*-melodorinol (23) (100 MHz, CDCl<sub>3</sub>)**

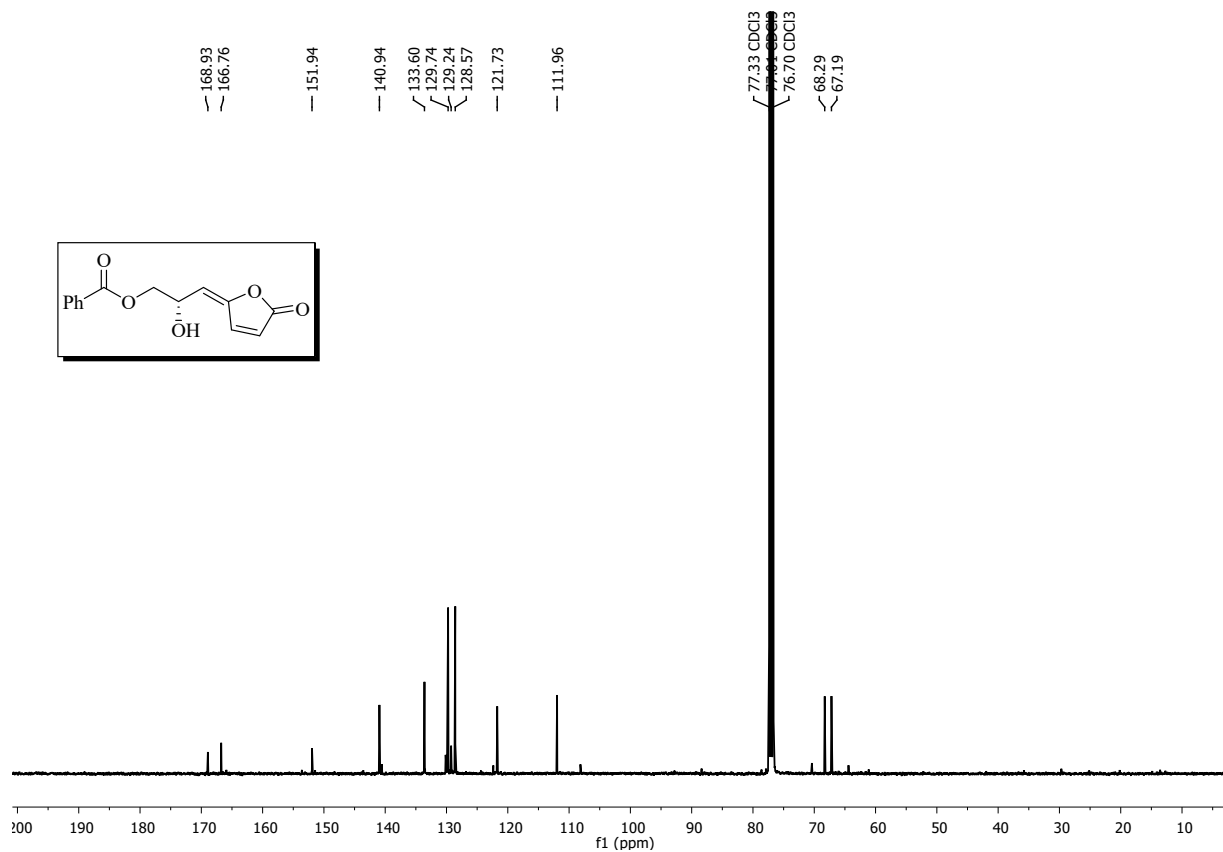

**DEPT-135- NMR of *E*-melodorinol (23) (100 MHz, CDCl<sub>3</sub>)**

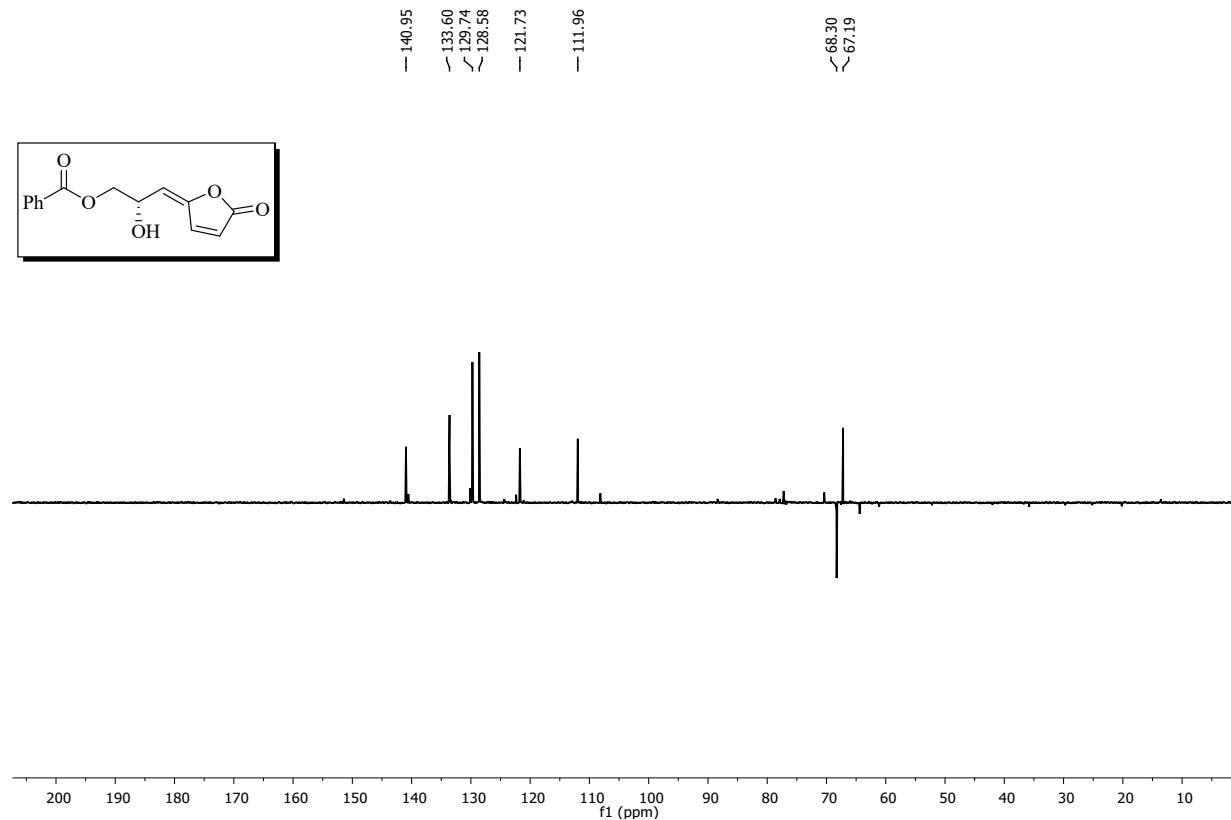

**<sup>1</sup>H NMR of *Z*-acetylmelodorinol (28) (400 MHz, CDCl<sub>3</sub>)**

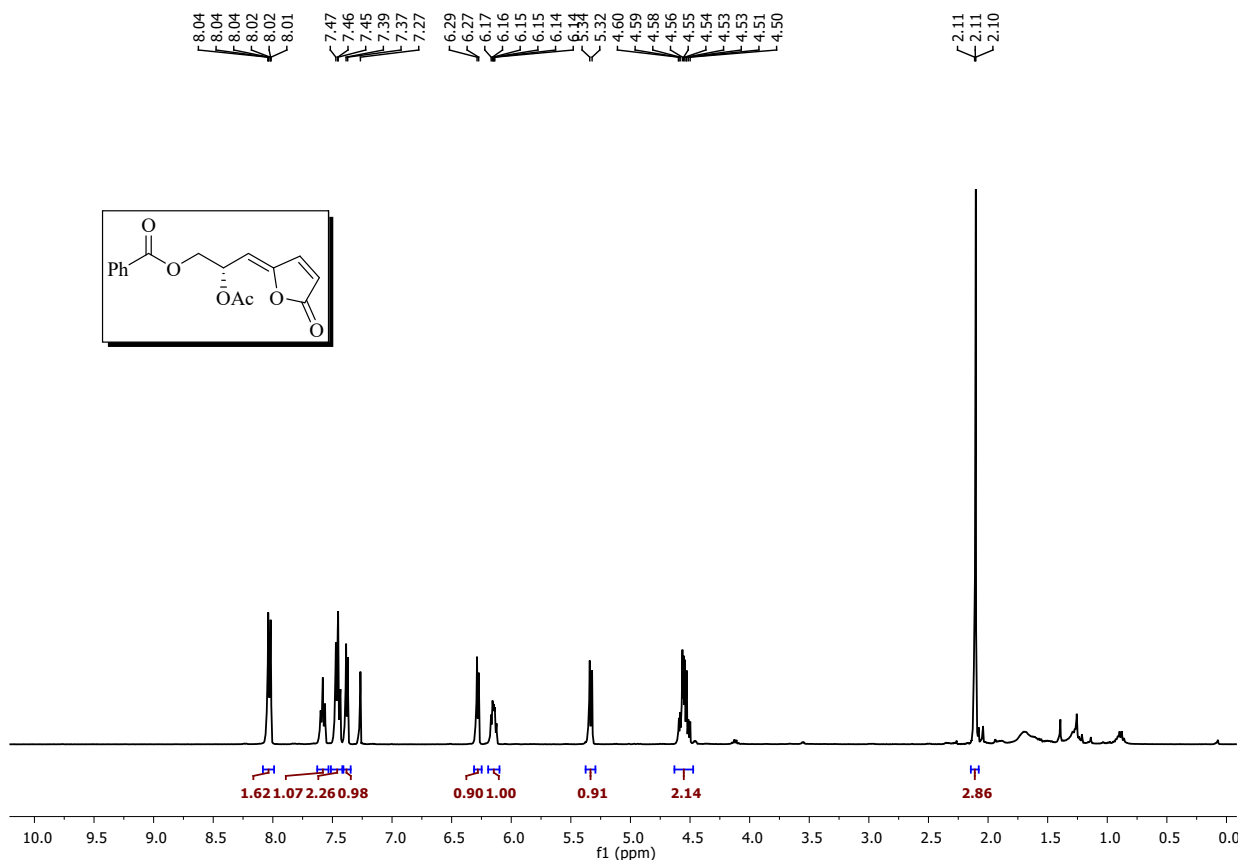

**<sup>13</sup>C NMR of Z-acetylmelodorinol (28) (100 MHz, CDCl<sub>3</sub>)**

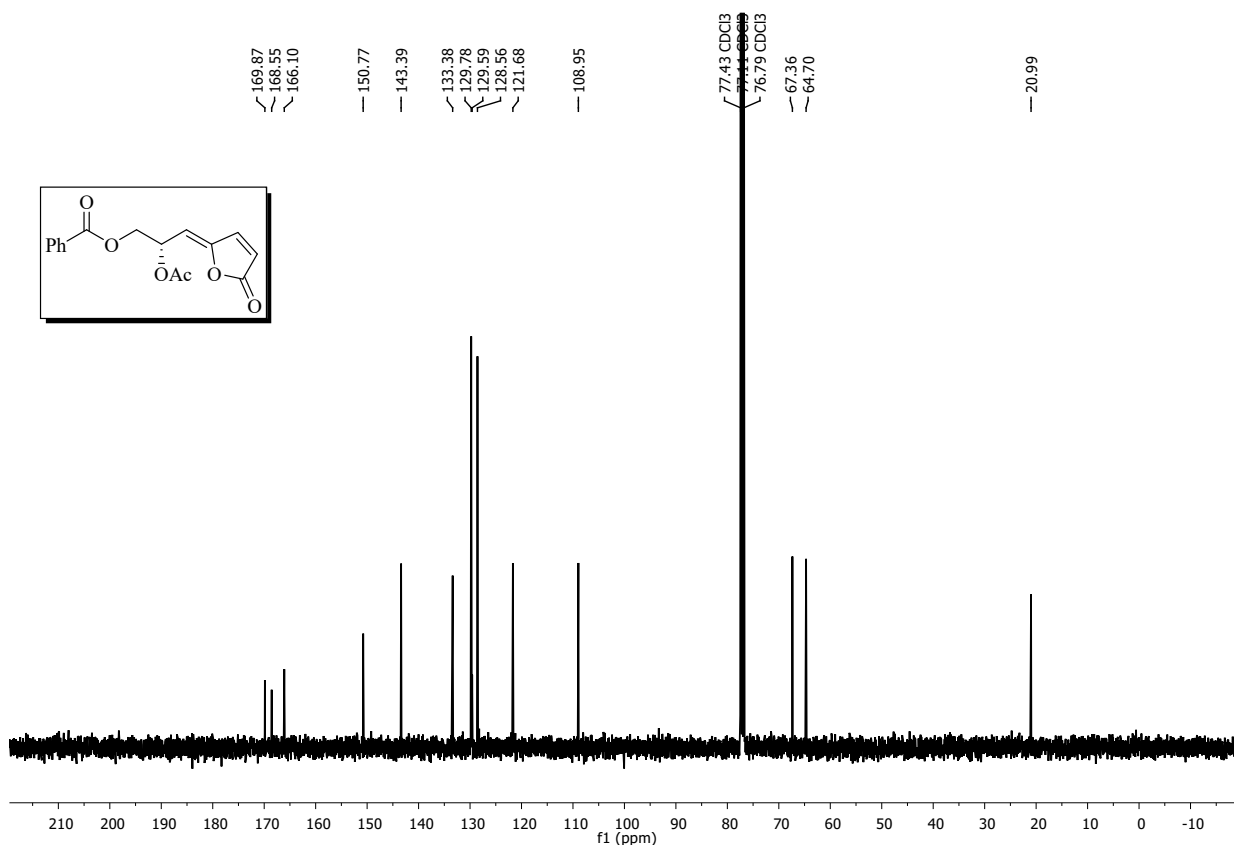

**DEPT-135- NMR of Z-acetylmelodorinol (28) (100 MHz, CDCl<sub>3</sub>)**

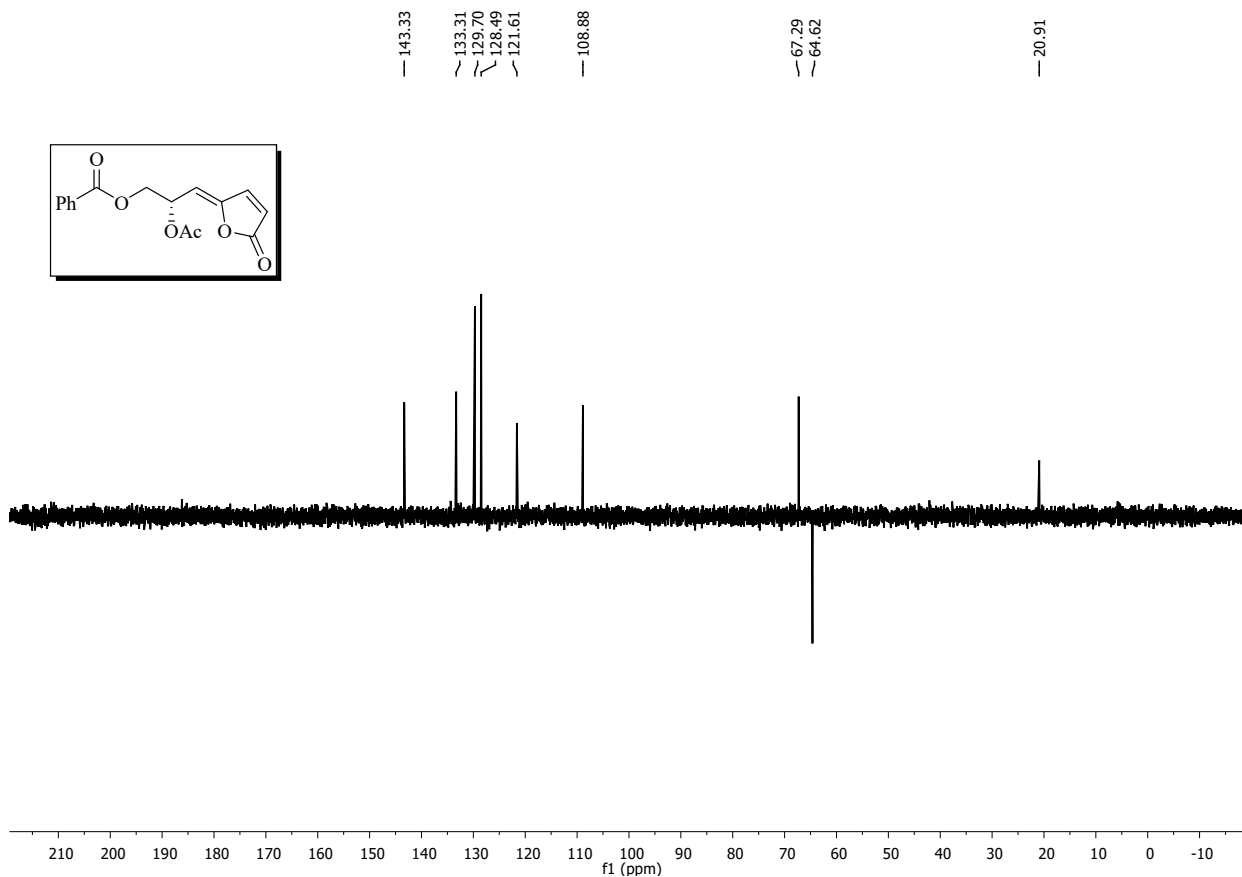

**<sup>1</sup>H NMR of *E*-acetylmelodorinol (22) (400 MHz, CDCl<sub>3</sub>)**

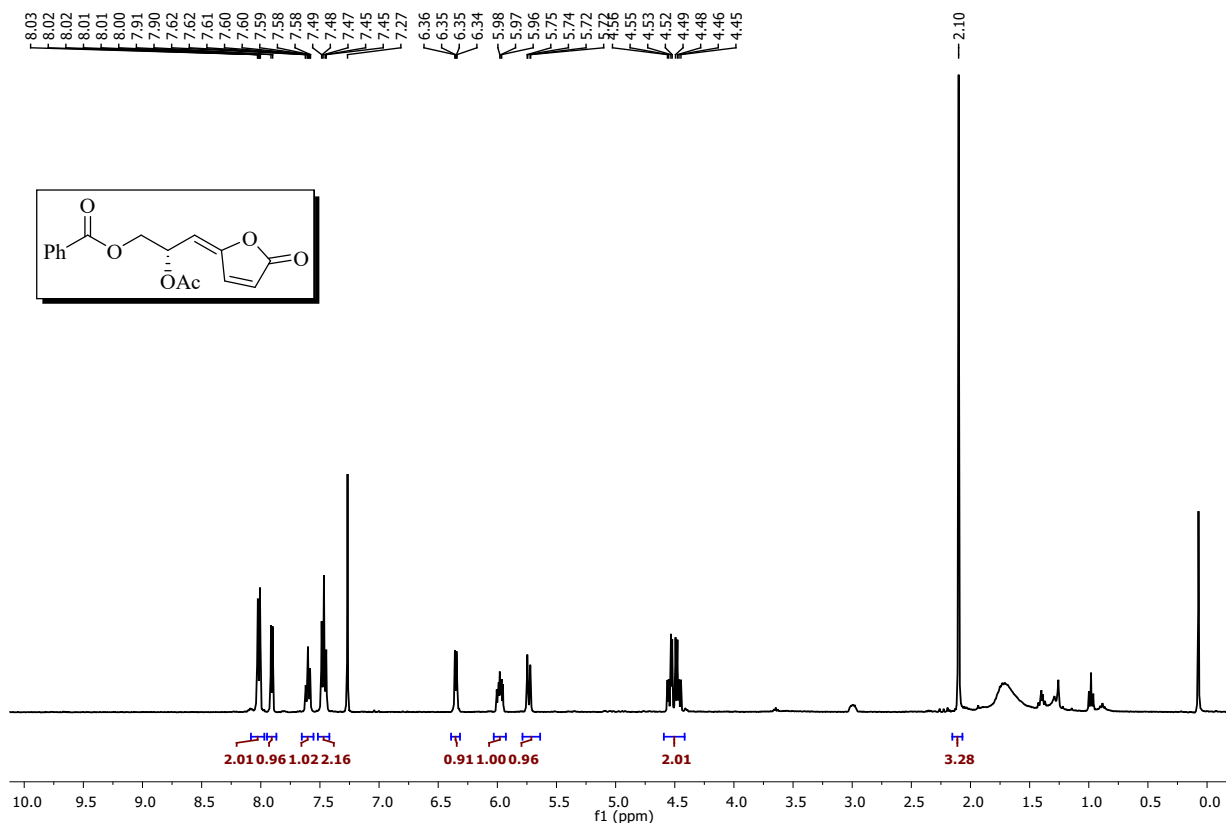

**<sup>13</sup>C NMR of *E*-acetylmelodorinol (22) (100 MHz, CDCl<sub>3</sub>)**

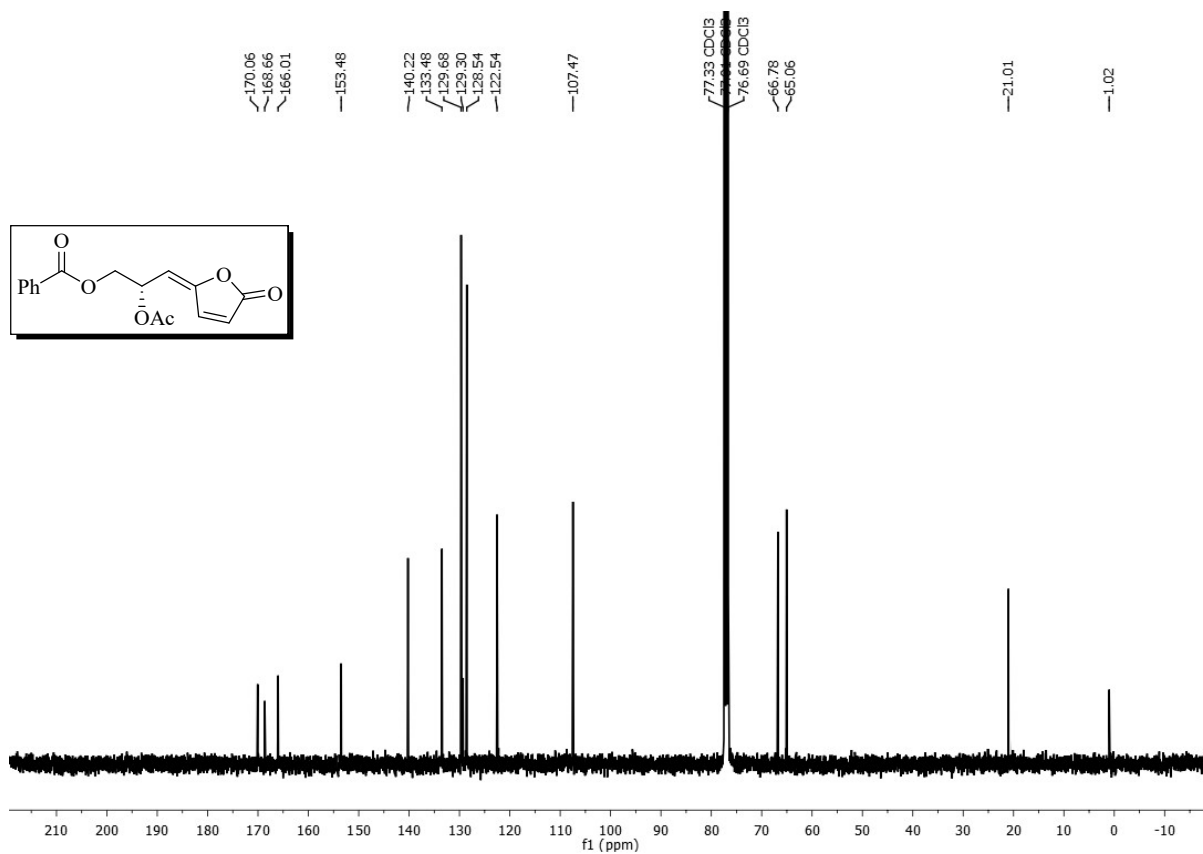

**DEPT-135- NMR of *E*-acetylmelodorinol (22) (100 MHz, CDCl<sub>3</sub>)**

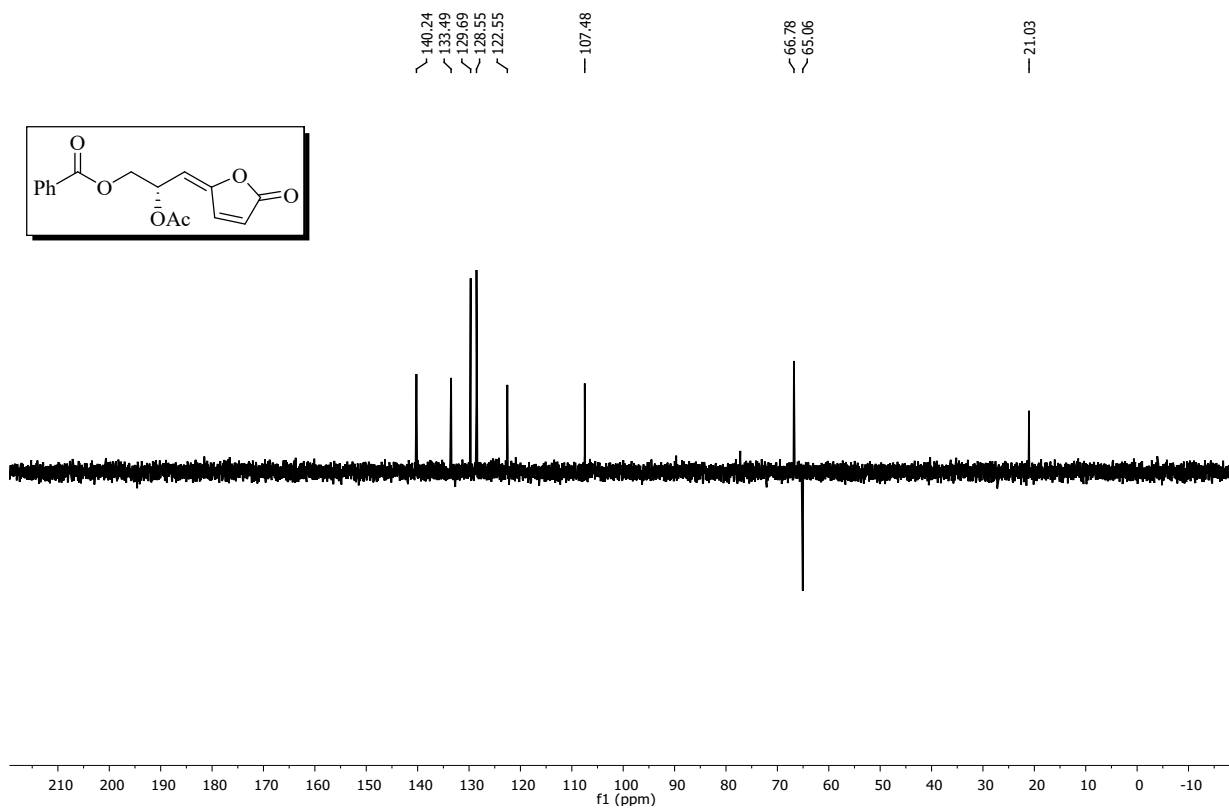

**<sup>1</sup>H (400 MHz) NMR of compound 32 in CDCl<sub>3</sub>**

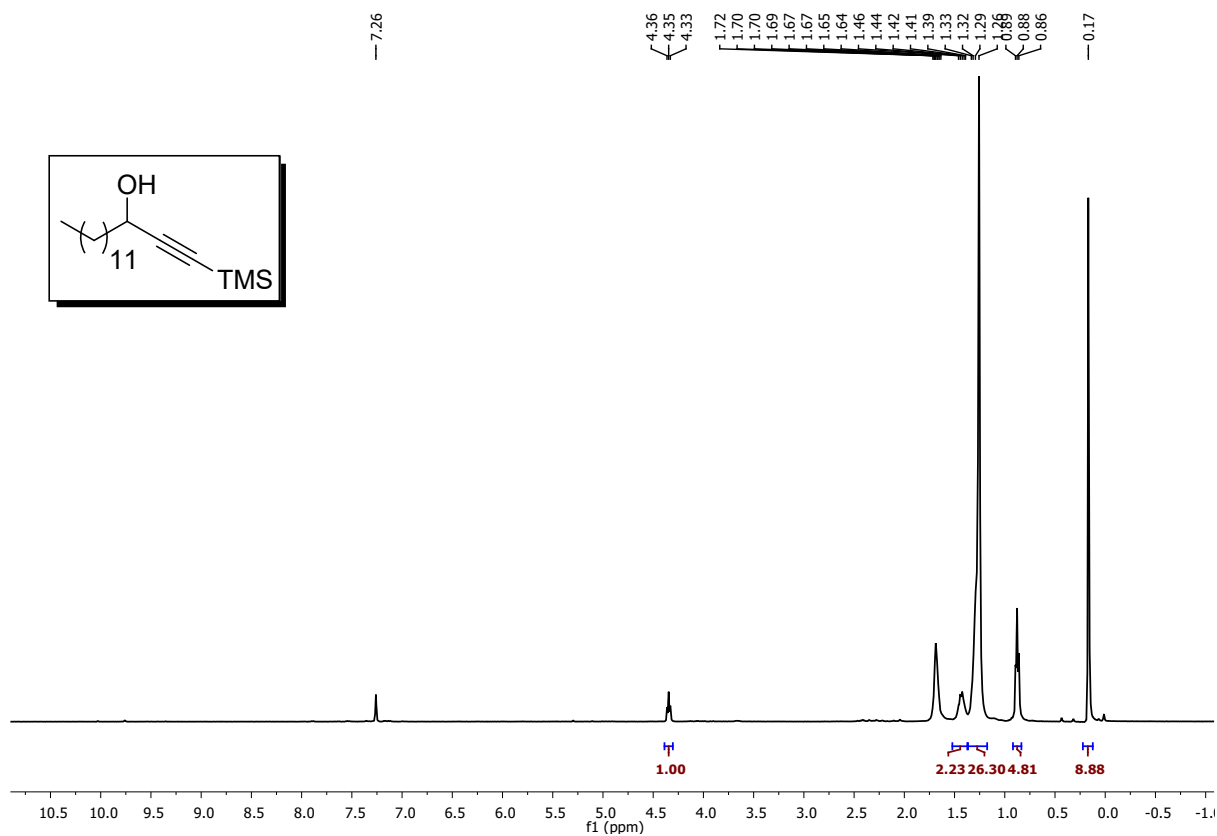

**<sup>13</sup>C (100 MHz) NMR of compound 32 in CDCl<sub>3</sub>**

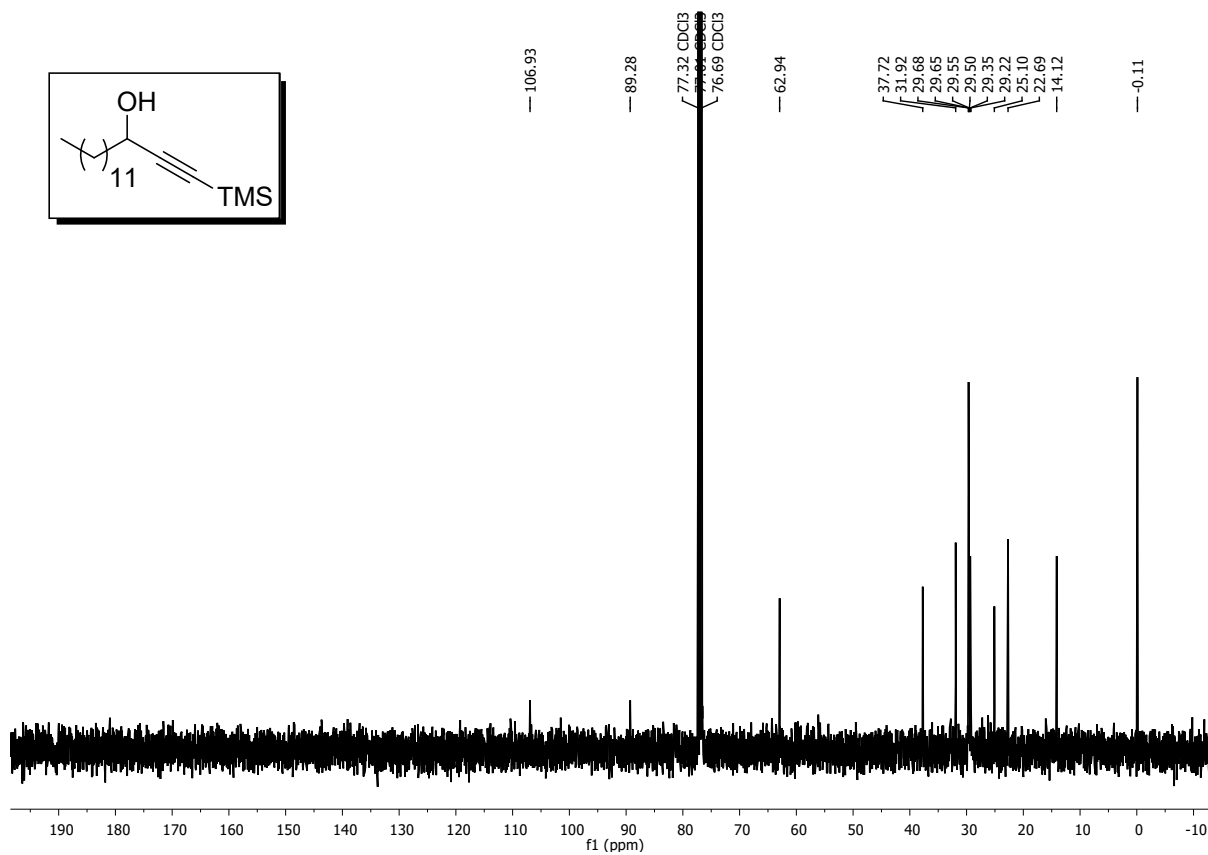

DEPT (100 MHz) NMR of compound 32 in CDCl<sub>3</sub>

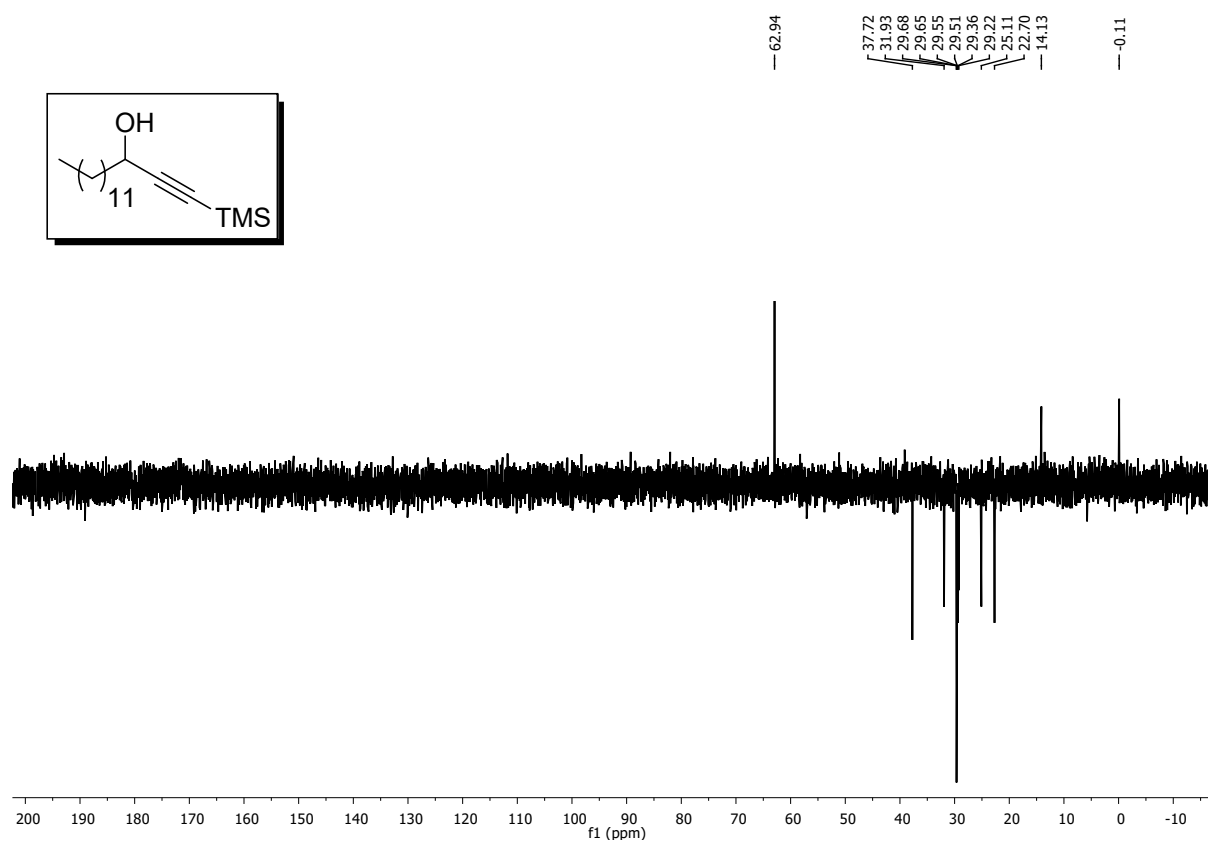

<sup>1</sup>H (400 MHz) NMR of compound 31 in CDCl<sub>3</sub>

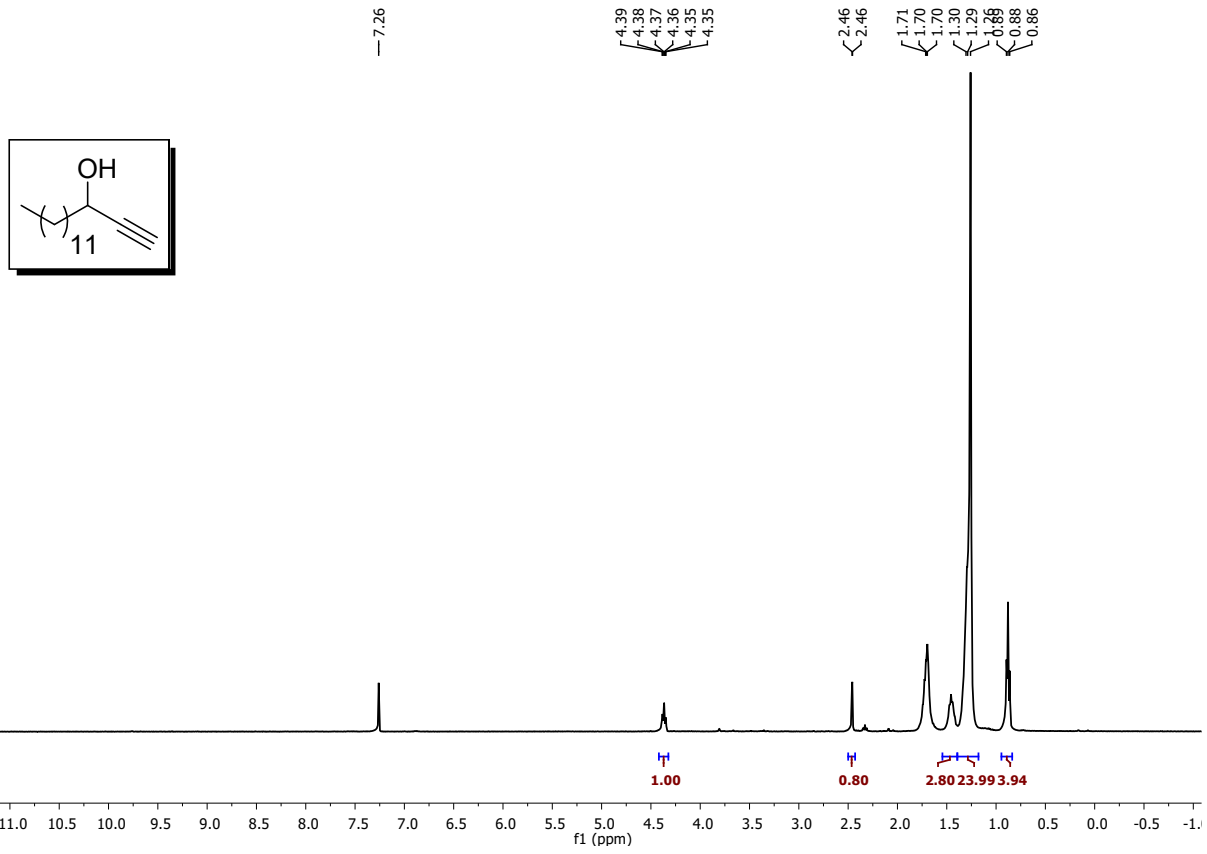

$^{13}\text{C}$  (100 MHz) NMR of compound 31 in  $\text{CDCl}_3$

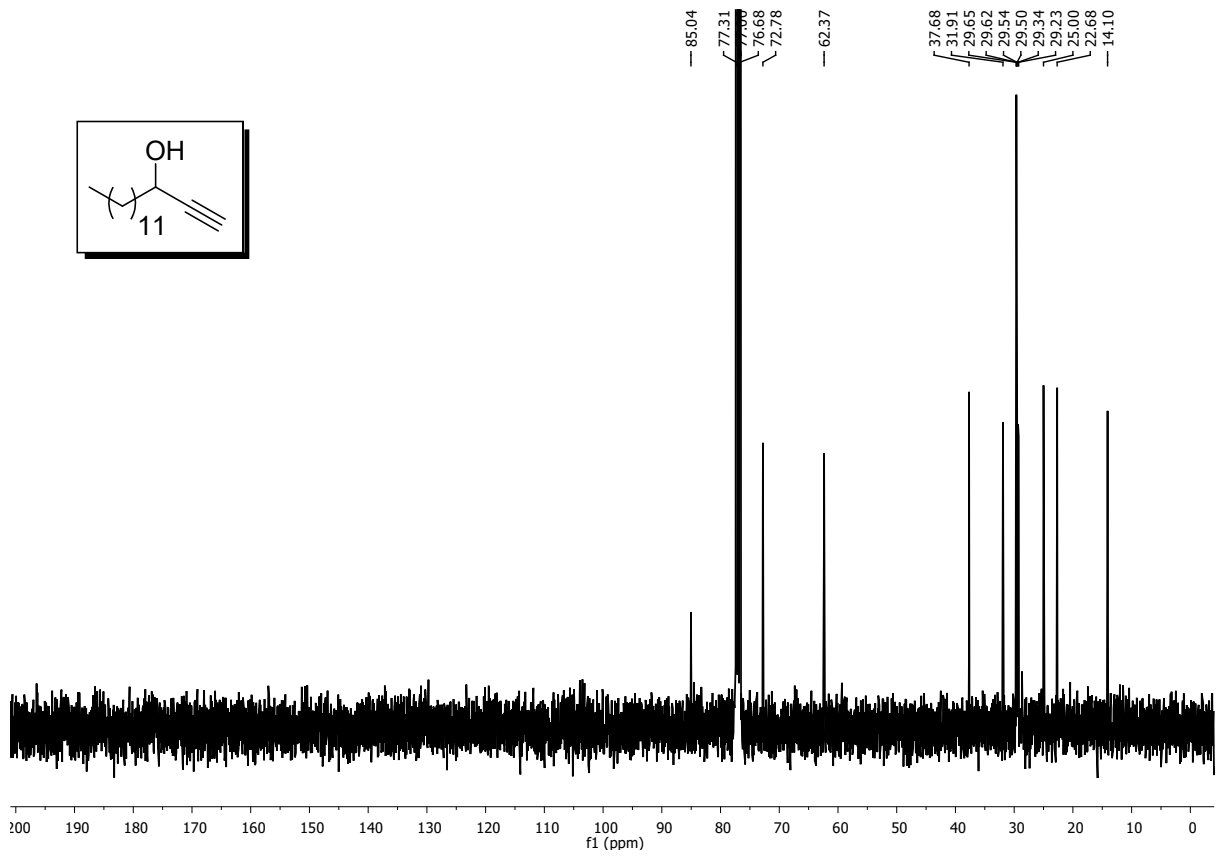



**DEPT (100 MHz) NMR of compound 31 in CDCl<sub>3</sub>**

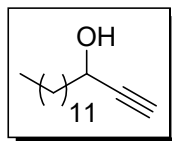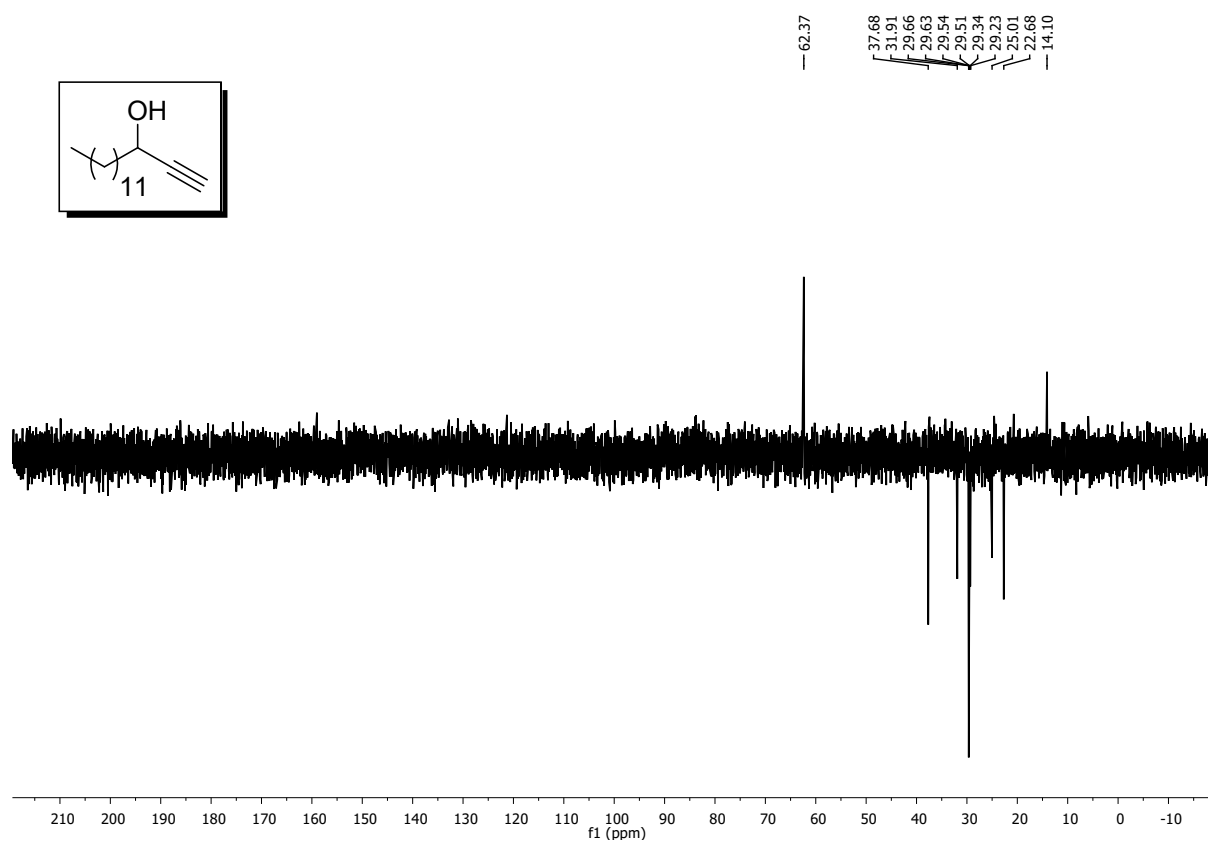

**<sup>1</sup>H (600 MHz) NMR of compound 34 in CDCl<sub>3</sub>**

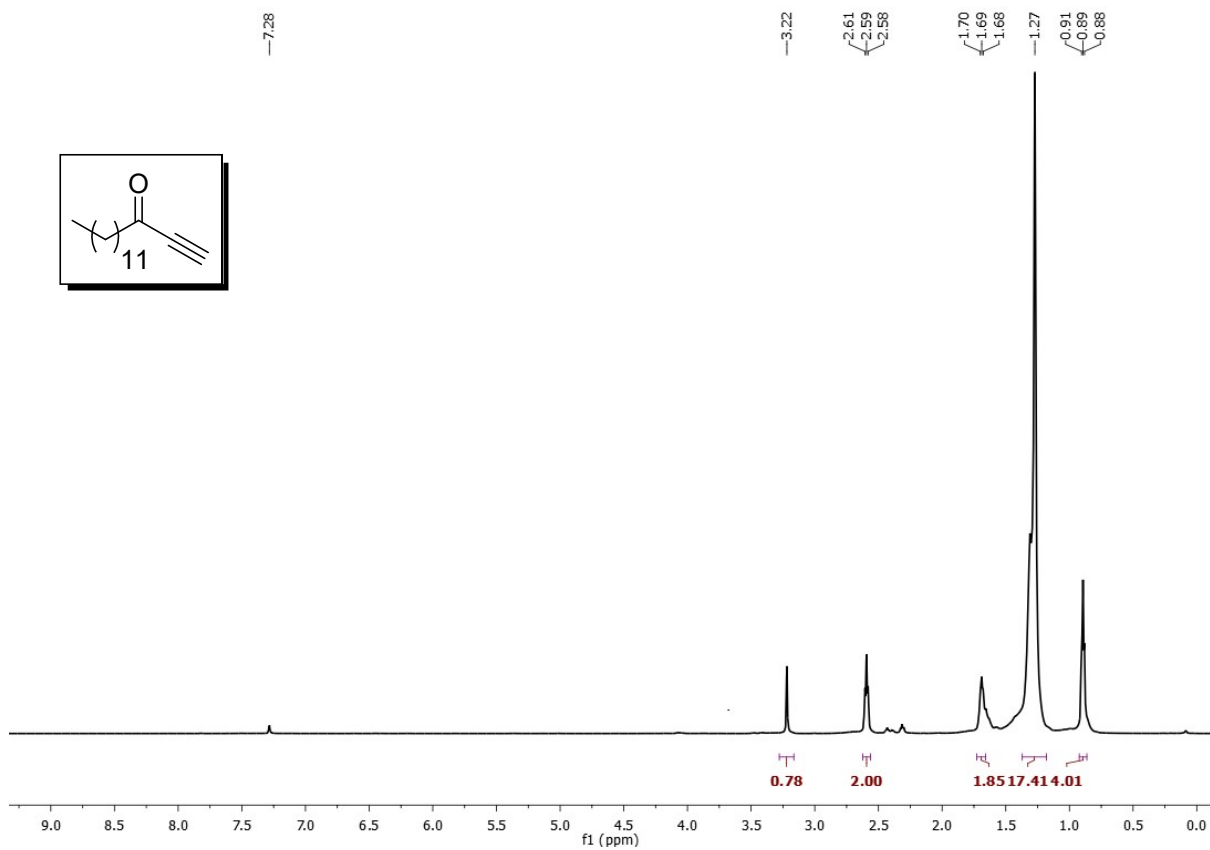

$^{13}\text{C}$  (150 MHz) NMR of compound 34 in  $\text{CDCl}_3$

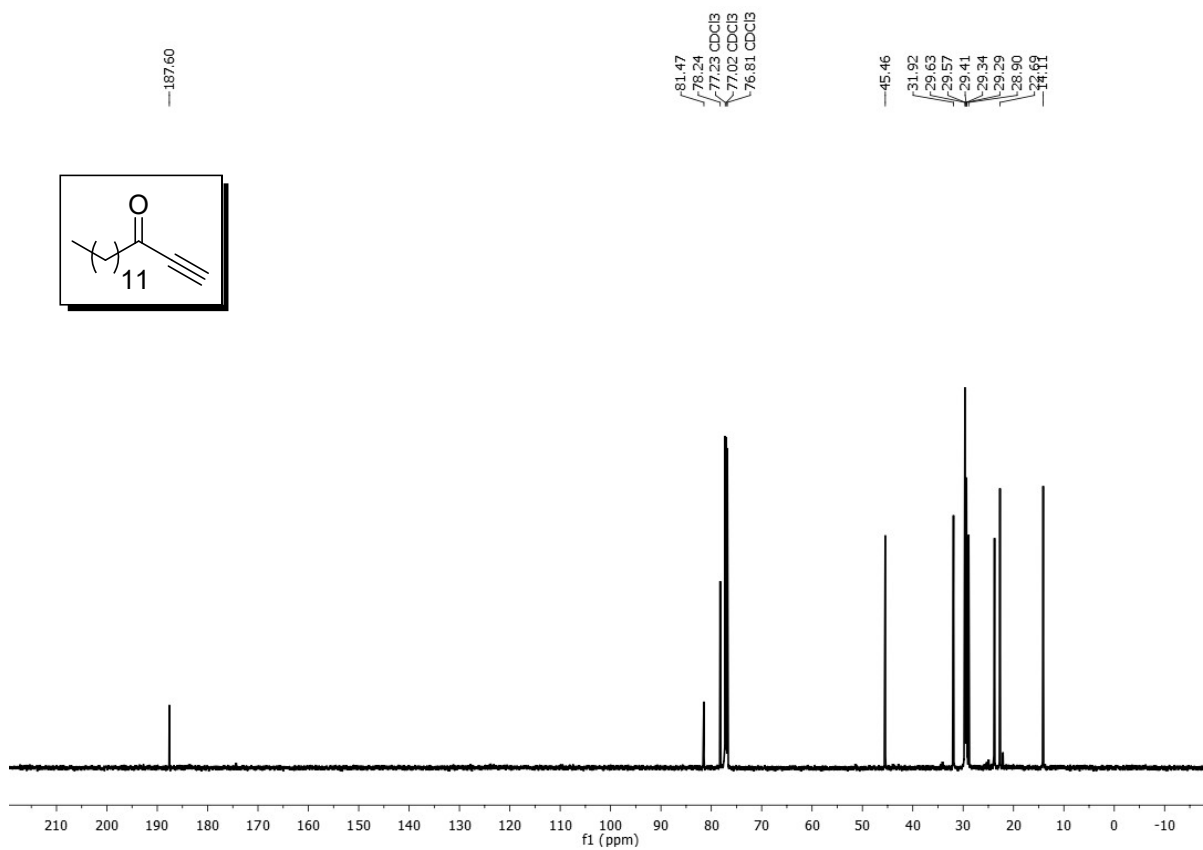

DEPT (100 MHz) NMR of compound 34 in  $\text{CDCl}_3$

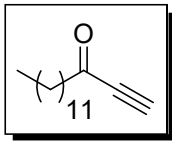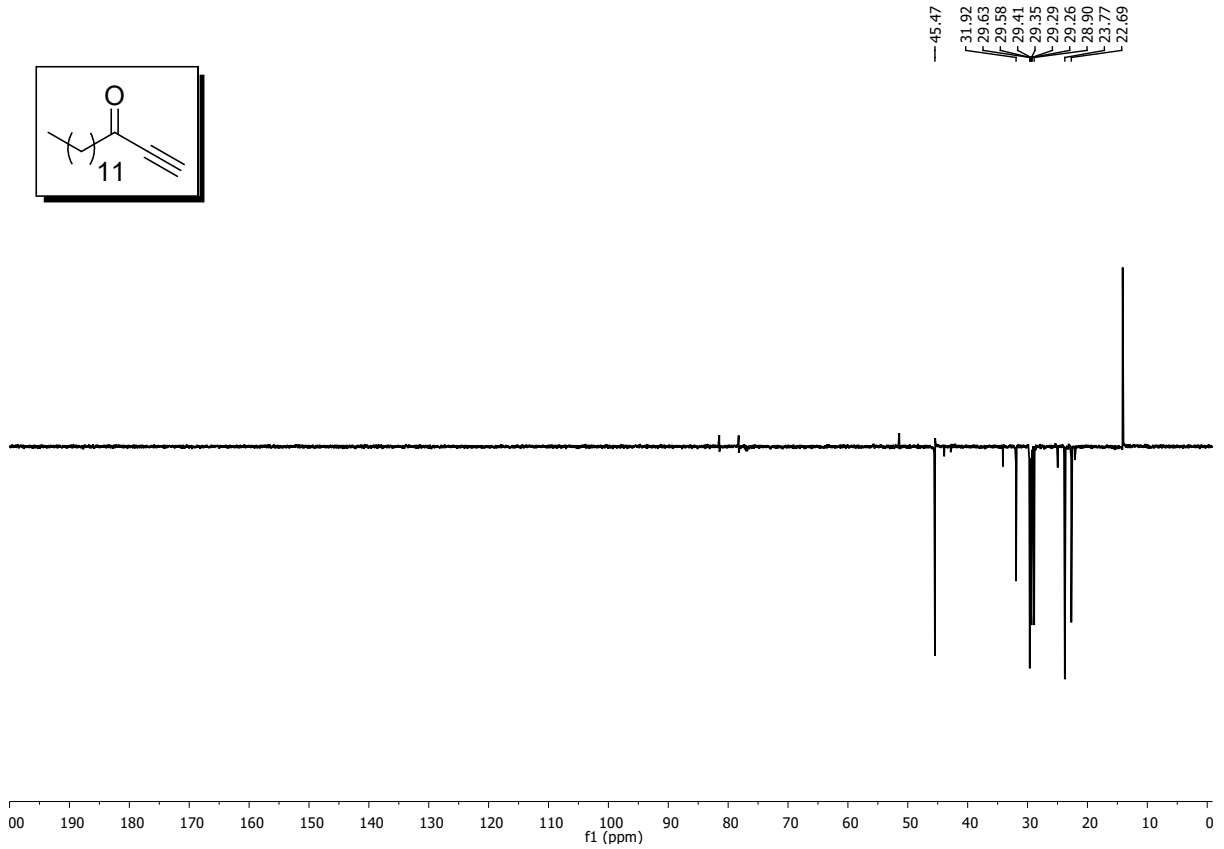

**$^1\text{H}$  NMR of hygrophorone G (30) (400 MHz,  $\text{CDCl}_3$ )**

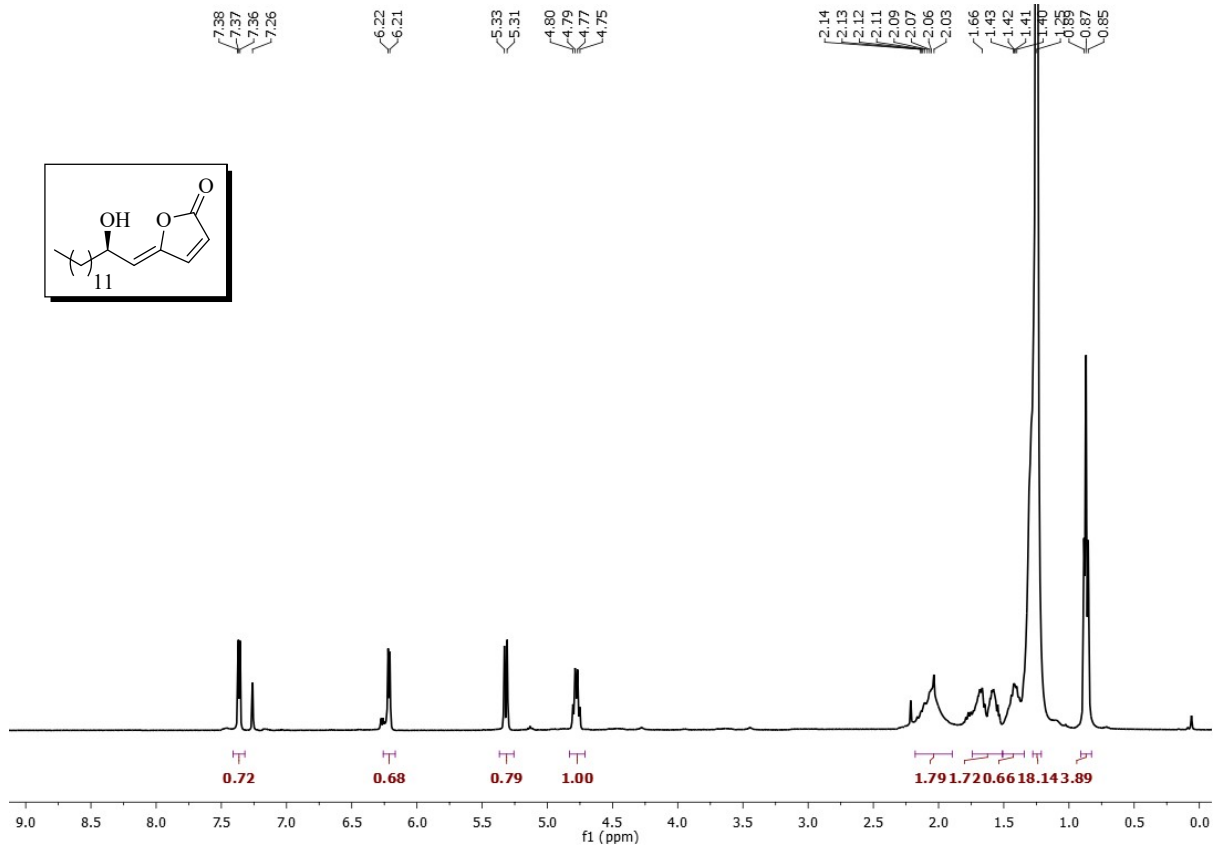

**$^{13}\text{C}$  NMR of hygrophorone G (30) (100 MHz,  $\text{CDCl}_3$ )**

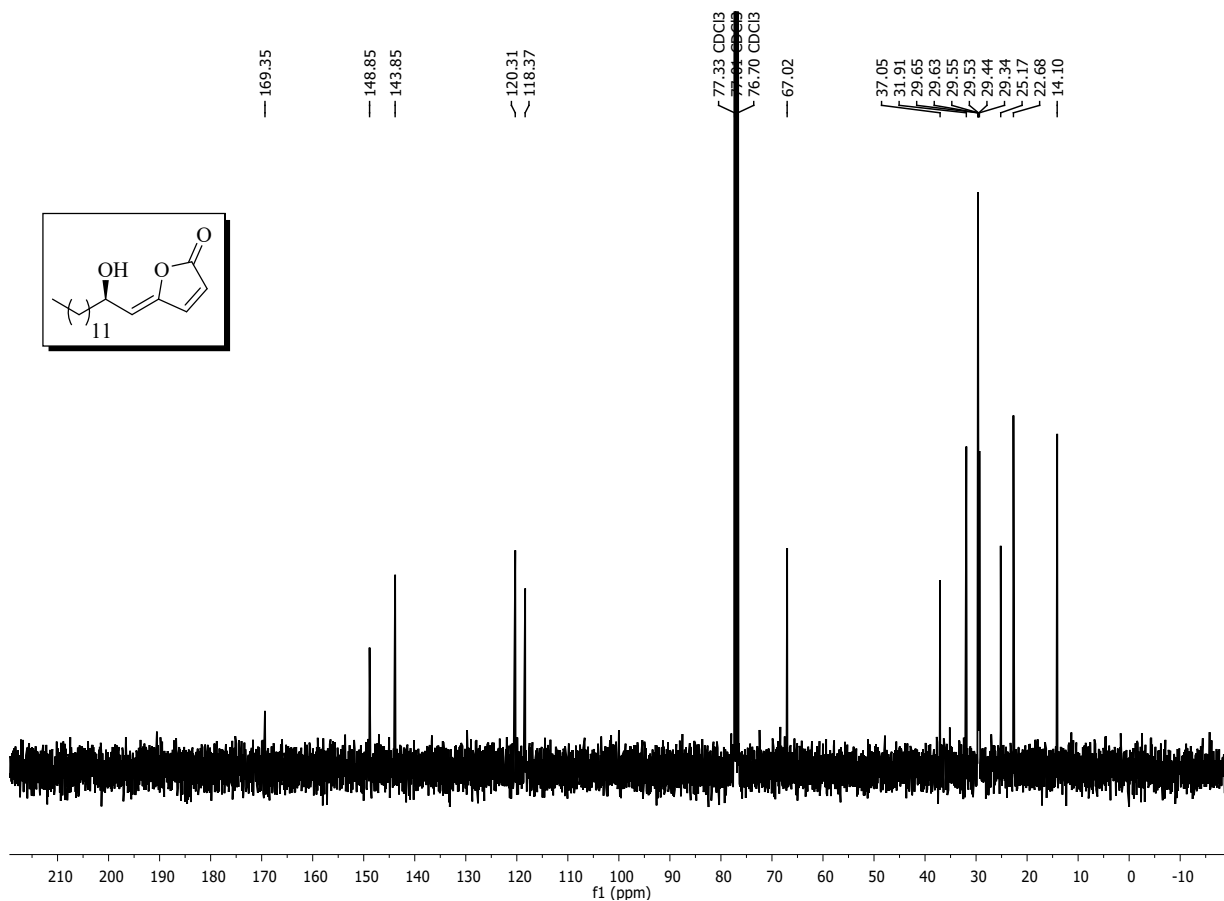

### DEPT-135- NMR of hygrophorone G (30) (100 MHz, CDCl<sub>3</sub>)

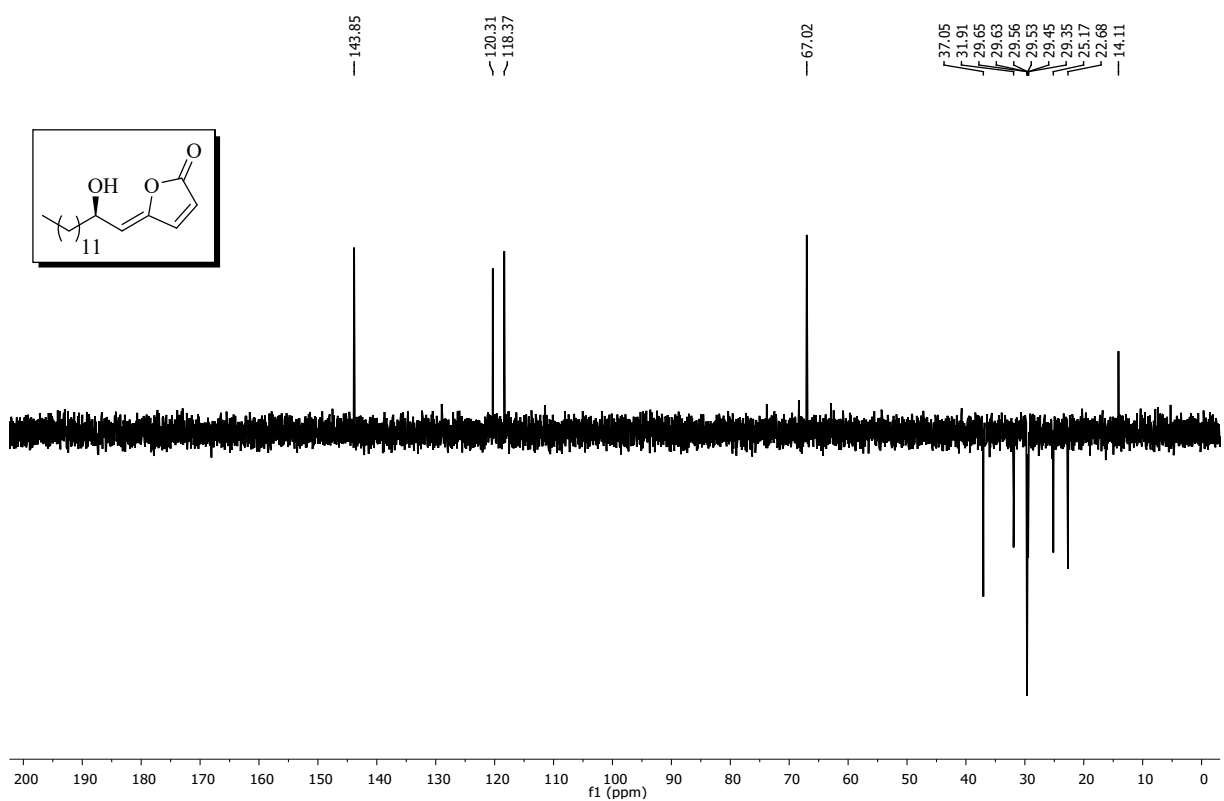

### <sup>1</sup>H NMR of hygrophorone F (29) (600 MHz, CDCl<sub>3</sub>)

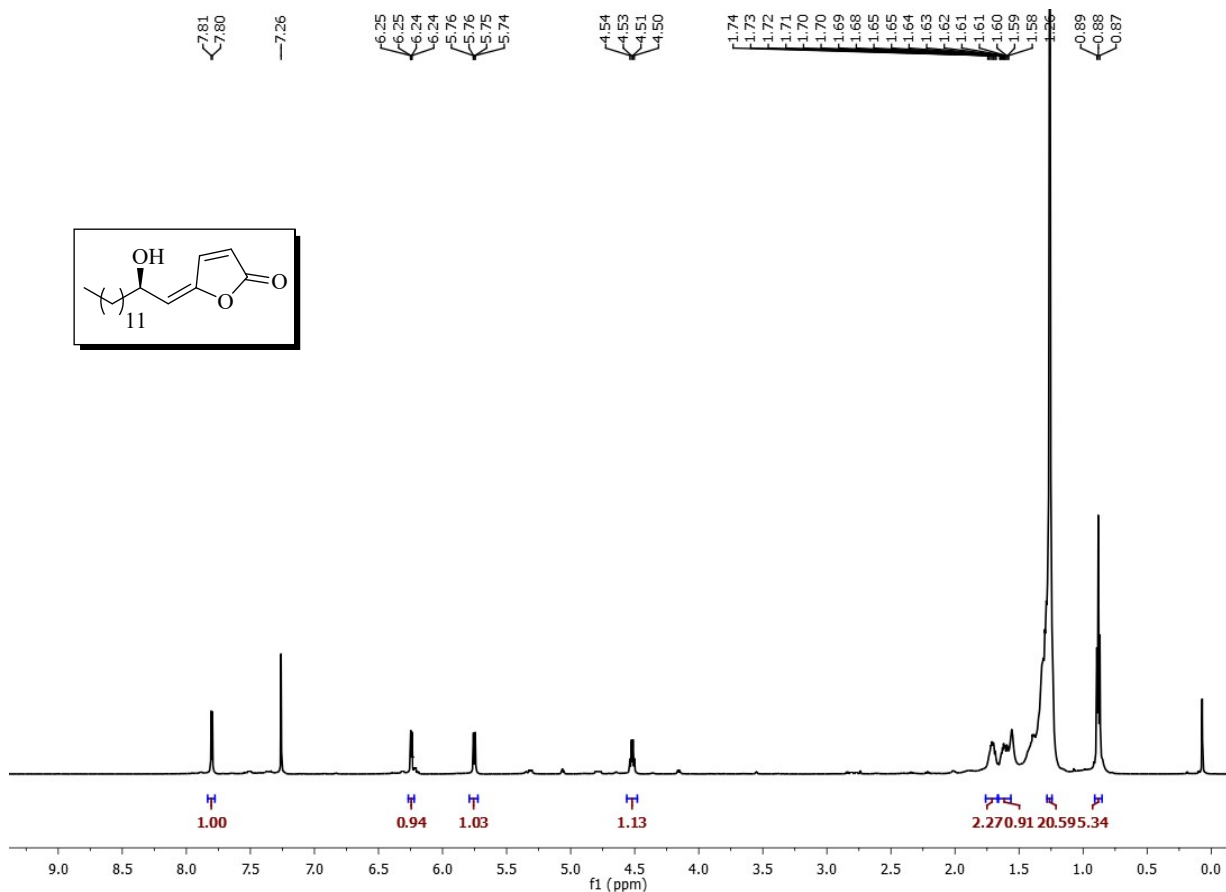

**<sup>13</sup>C NMR of hygrophorone F (29) (150 MHz, CDCl<sub>3</sub>)**

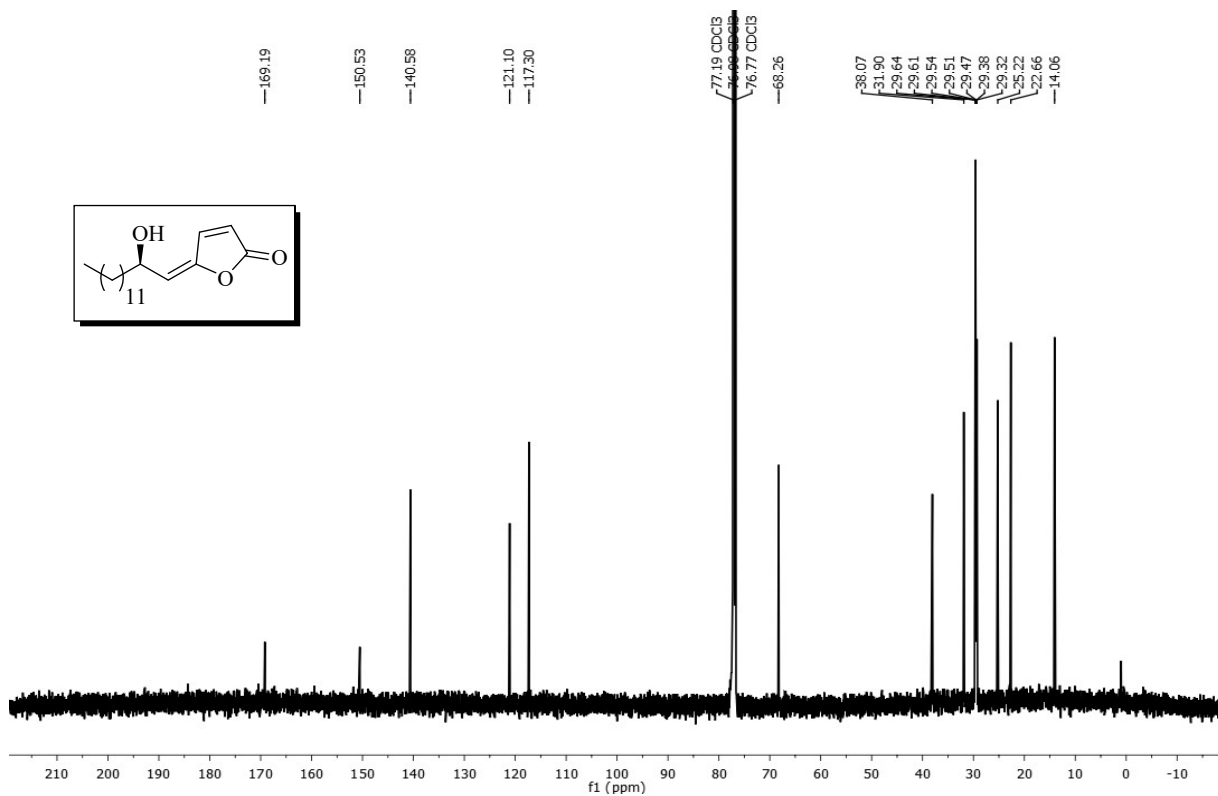

**<sup>1</sup>H (600 MHz) NMR of compound 37 in CDCl<sub>3</sub>**

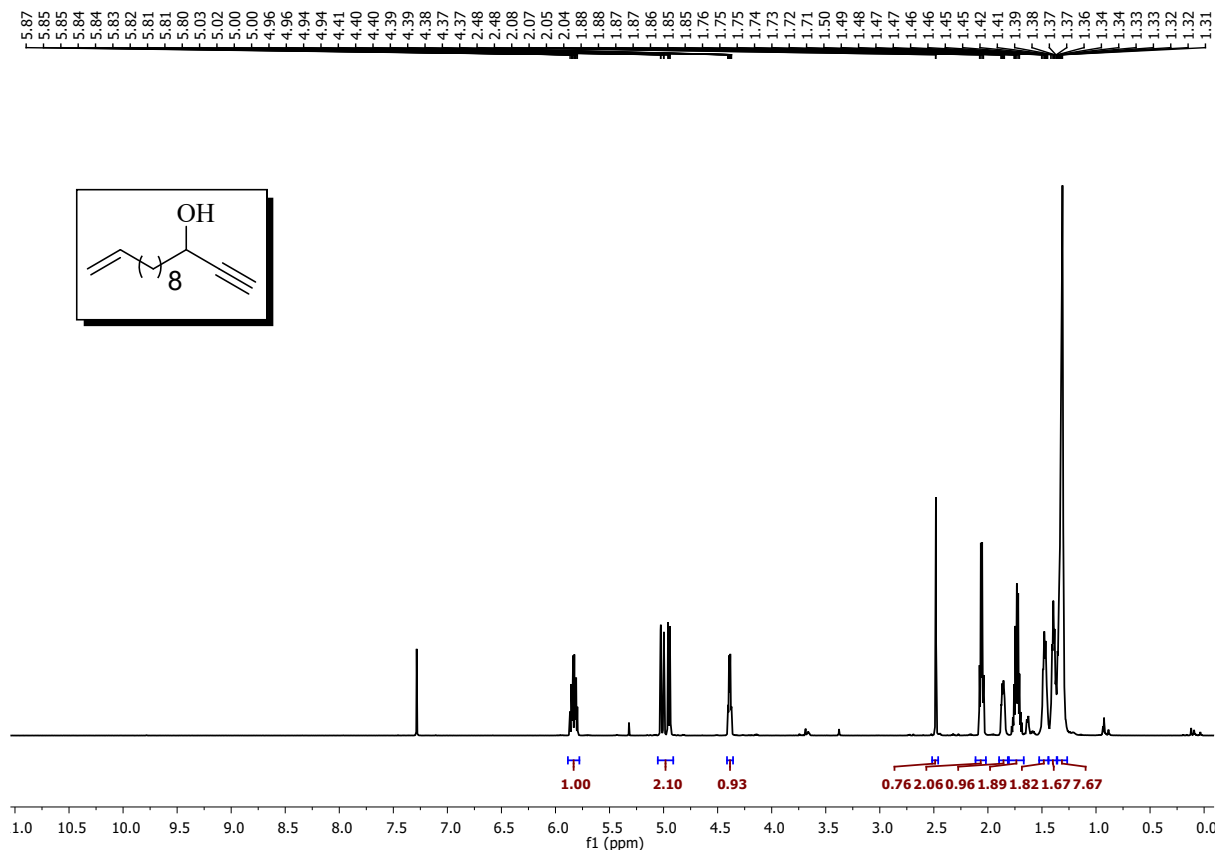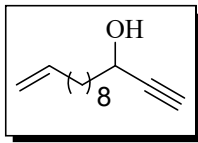

**<sup>13</sup>C (150 MHz) NMR of compound 37 in CDCl<sub>3</sub>**

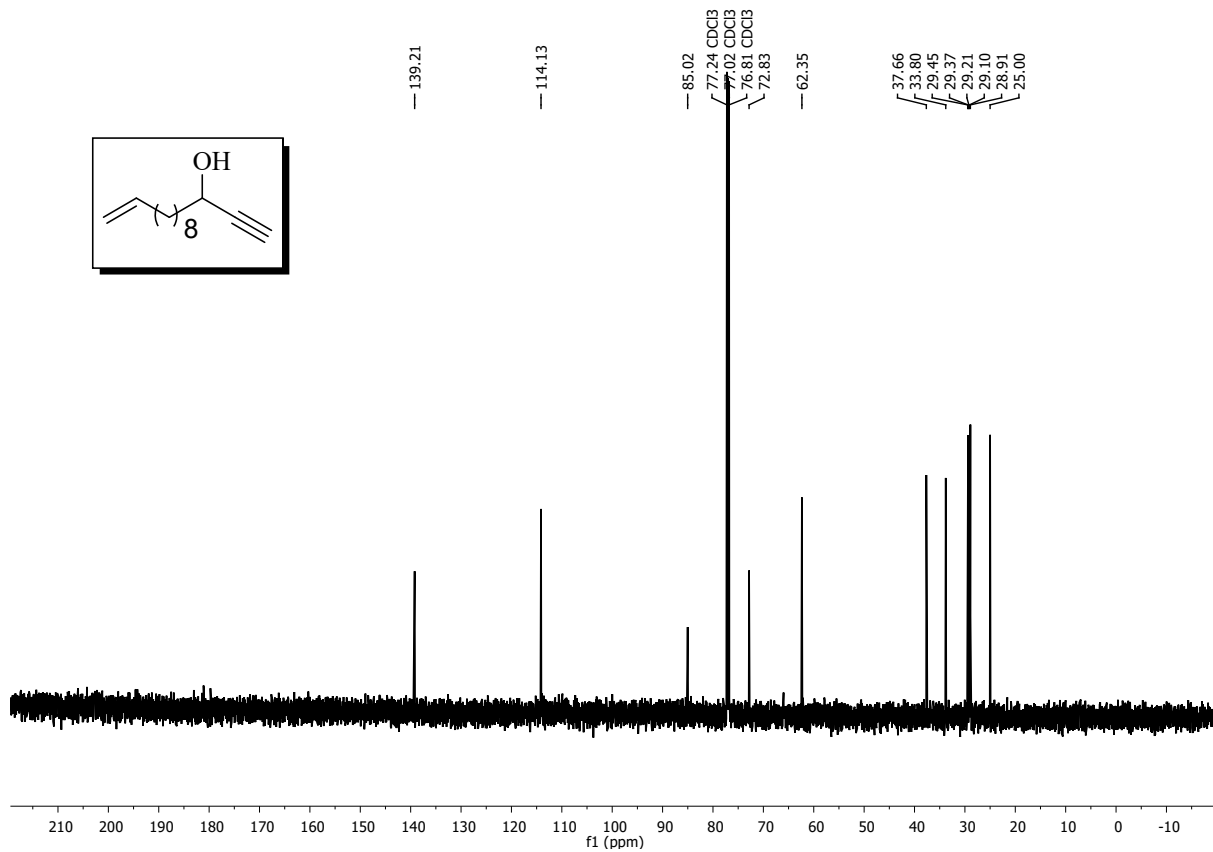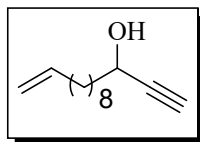

**DEPT (100 MHz) NMR of compound 37 in CDCl<sub>3</sub>**

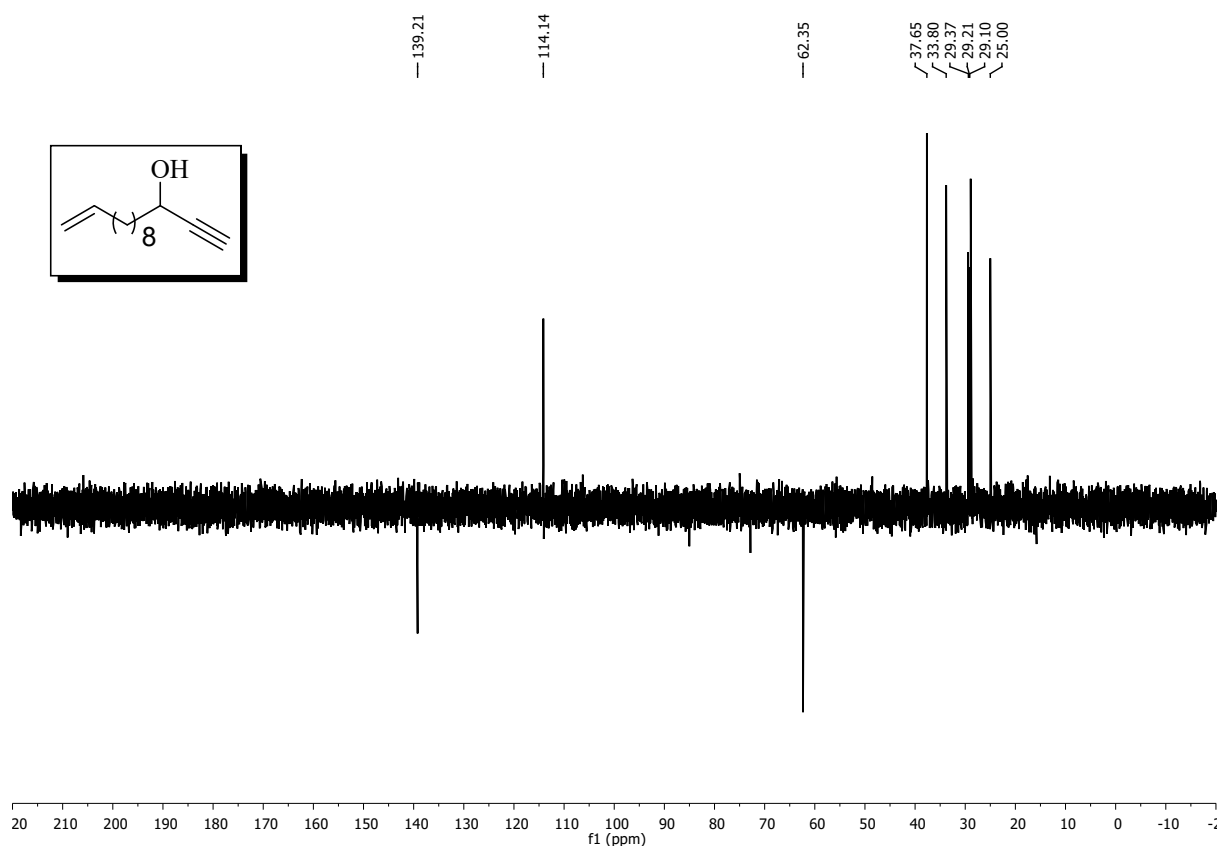

**<sup>1</sup>H (600 MHz) NMR of compound 38 in CDCl<sub>3</sub>**

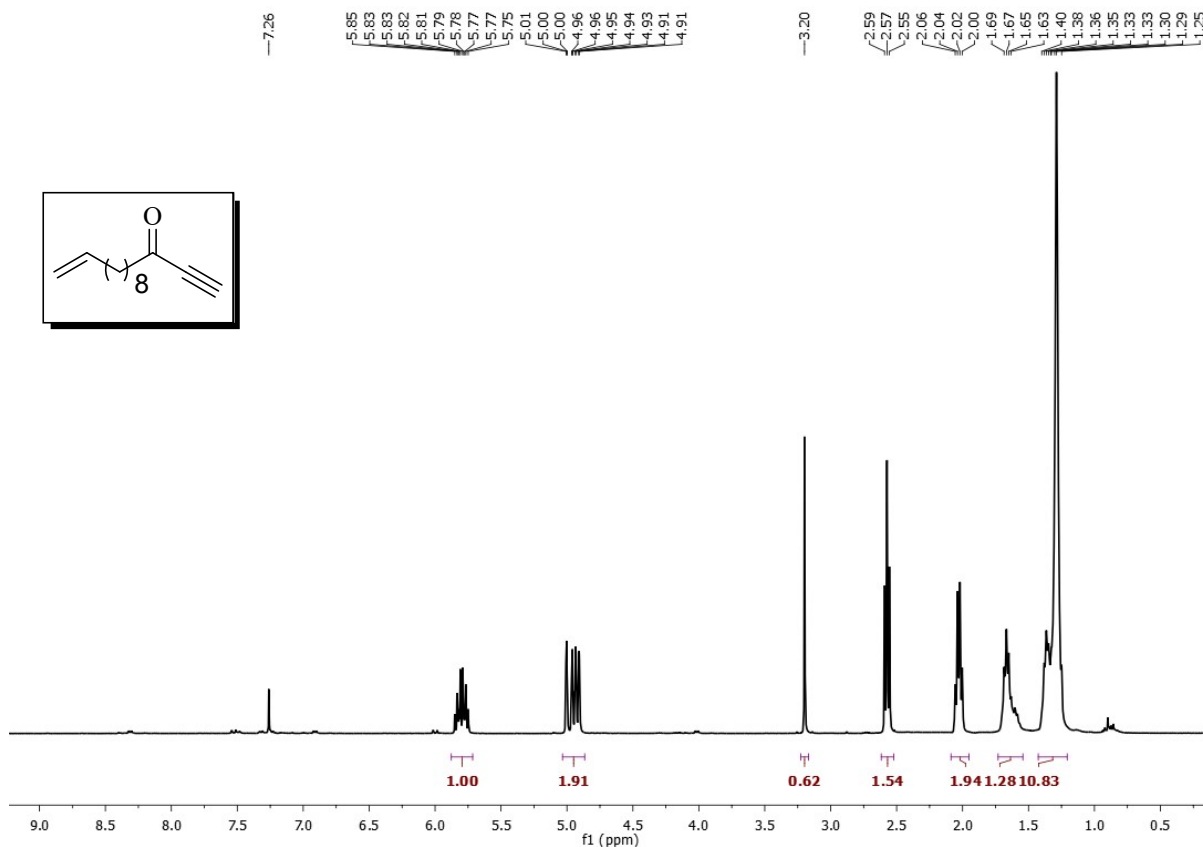

$^{13}\text{C}$  (150 MHz) NMR of compound 38 in  $\text{CDCl}_3$

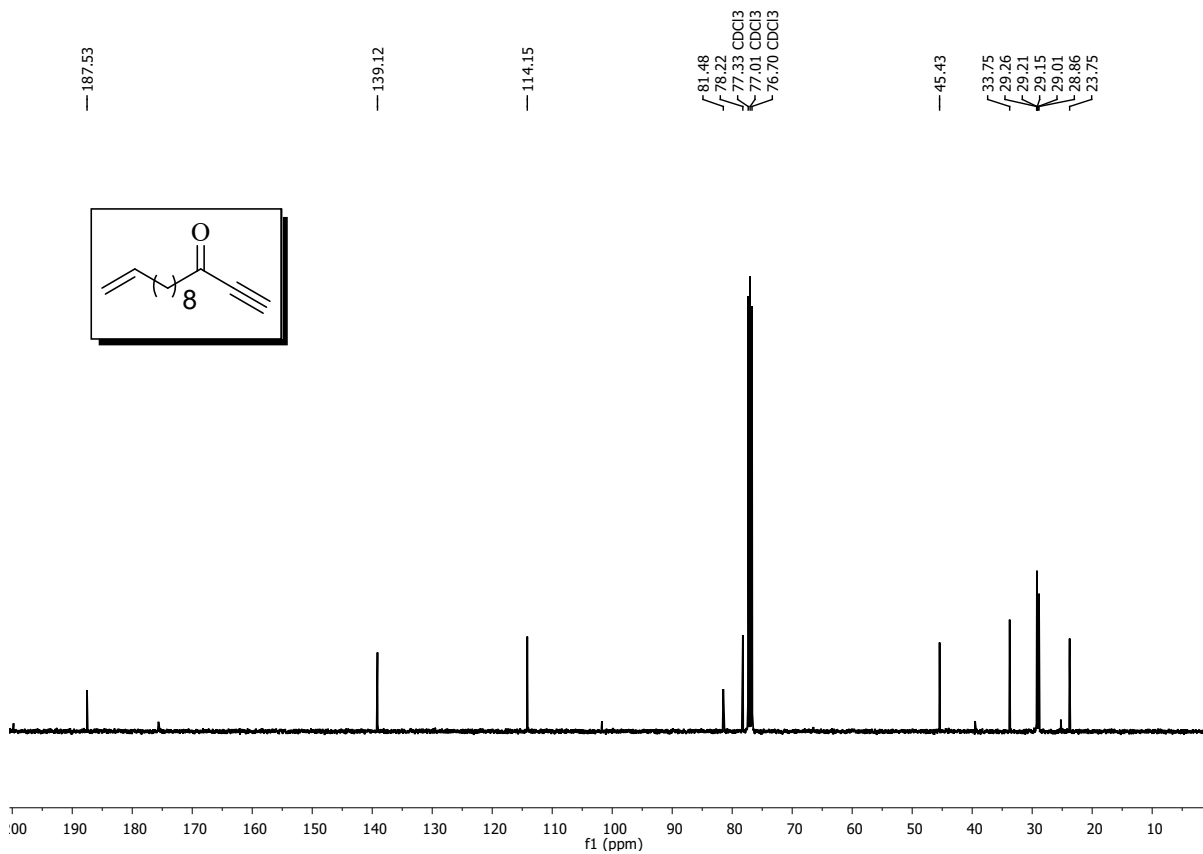

$^1\text{H}$  NMR of compound 36 (600 MHz,  $\text{C}_6\text{D}_6$ )



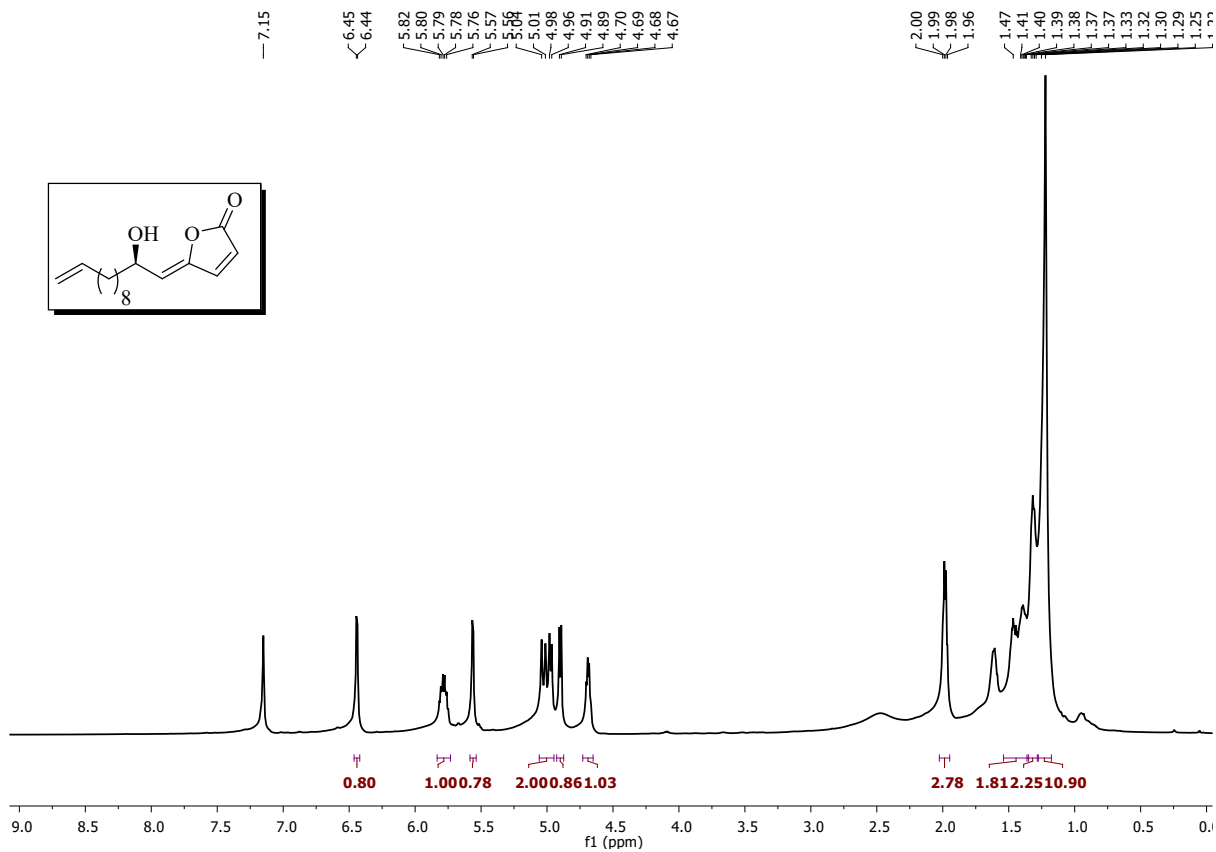

**<sup>13</sup>C NMR of compound 36 (100 MHz, C<sub>6</sub>D<sub>6</sub>)**

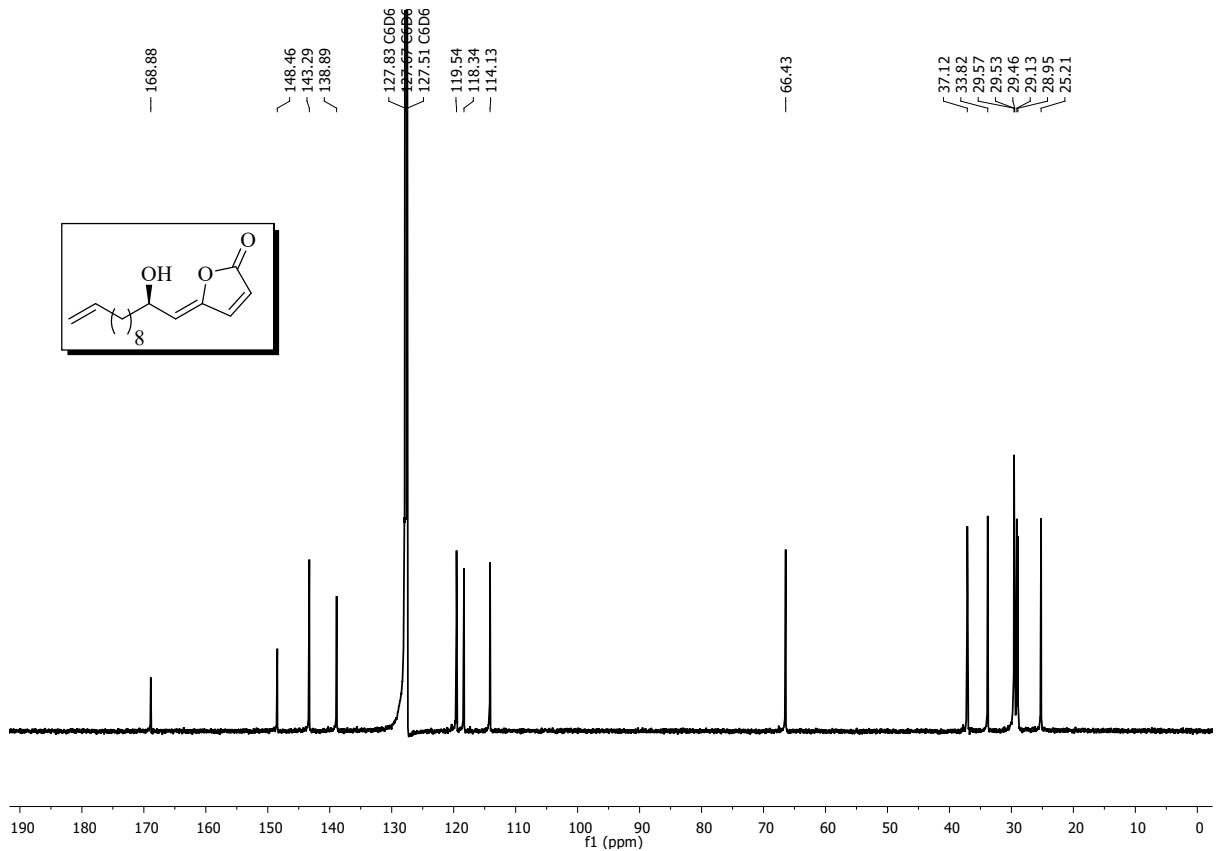

**DEPT-135- NMR of compound 36 (100 MHz, C<sub>6</sub>D<sub>6</sub>)**

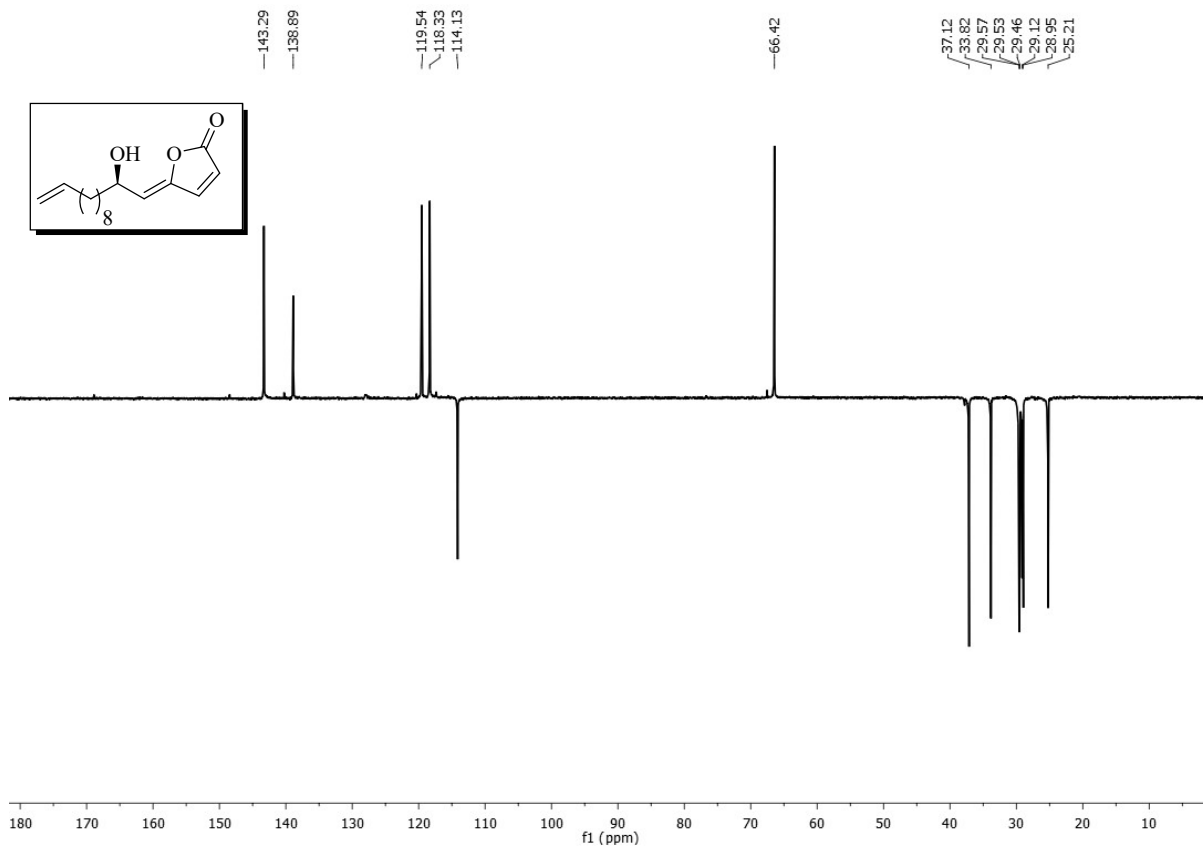

**<sup>1</sup>H NMR of ramariolide D (35) (600 MHz, C<sub>6</sub>D<sub>6</sub>)**

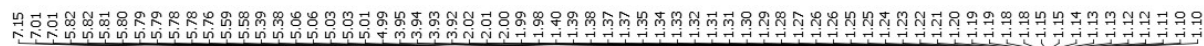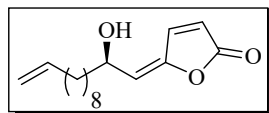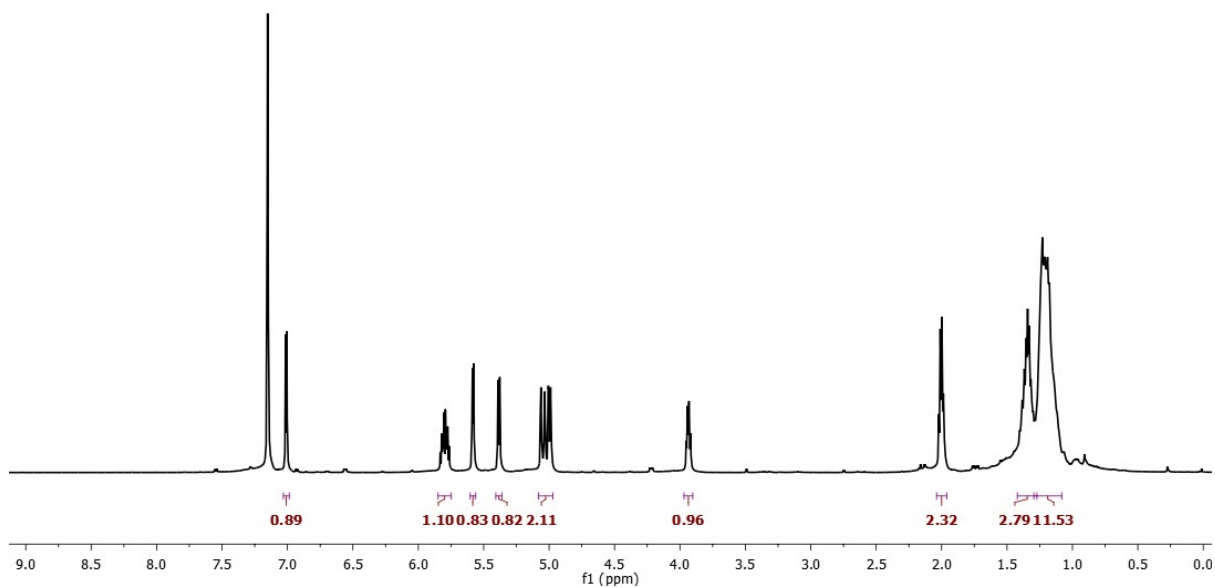

**<sup>13</sup>C NMR of ramariolide D (35) (150 MHz, C<sub>6</sub>D<sub>6</sub>)**

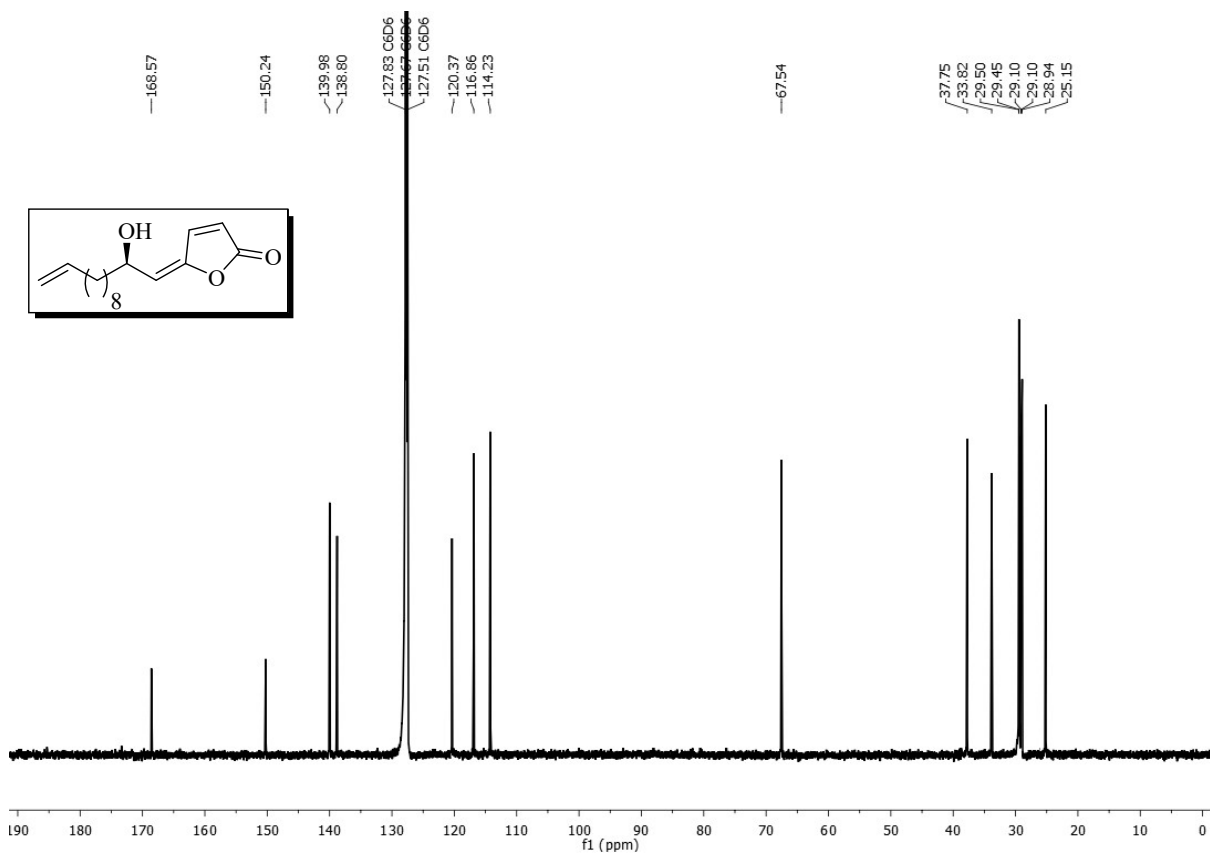

**DEPT-135- NMR of ramariolide D (35) (150 MHz, C<sub>6</sub>D<sub>6</sub>)**

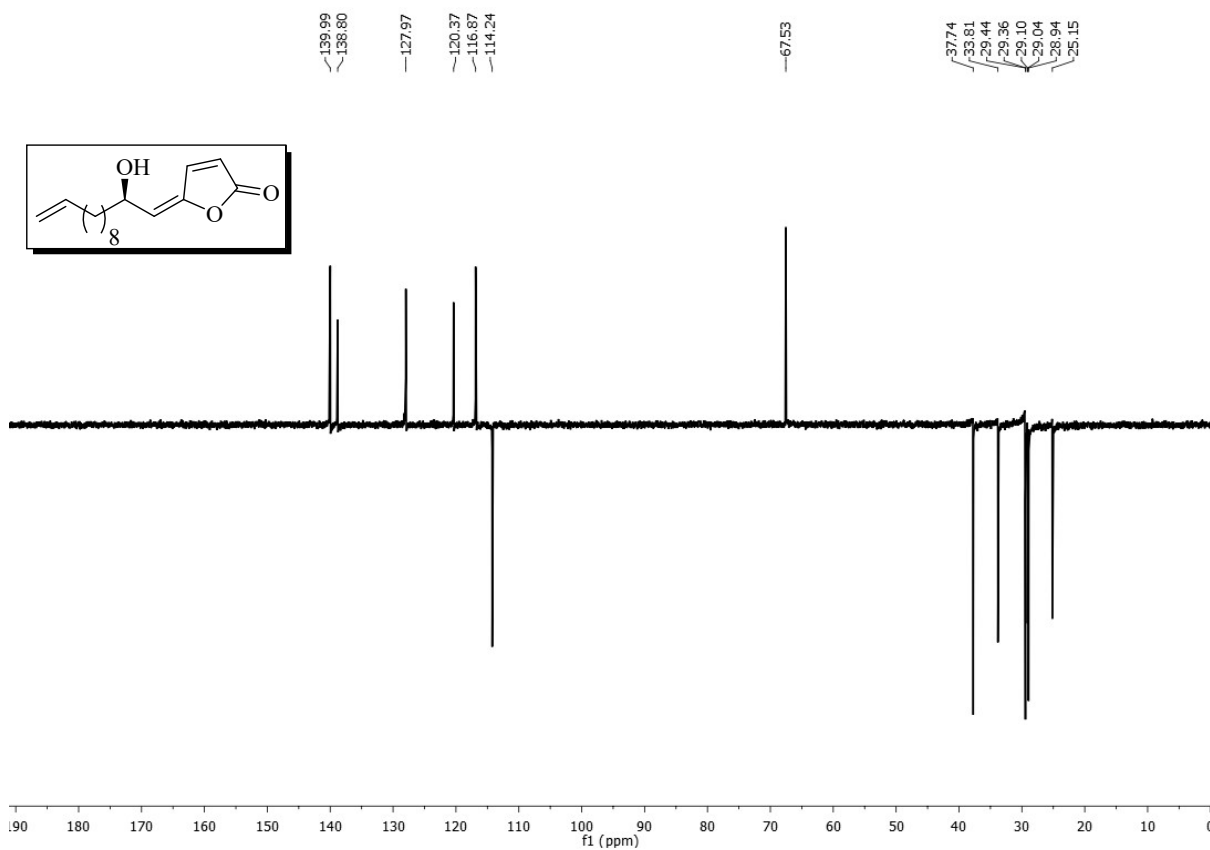

**<sup>1</sup>H (400 MHz) NMR of compound B3 in CDCl<sub>3</sub>**

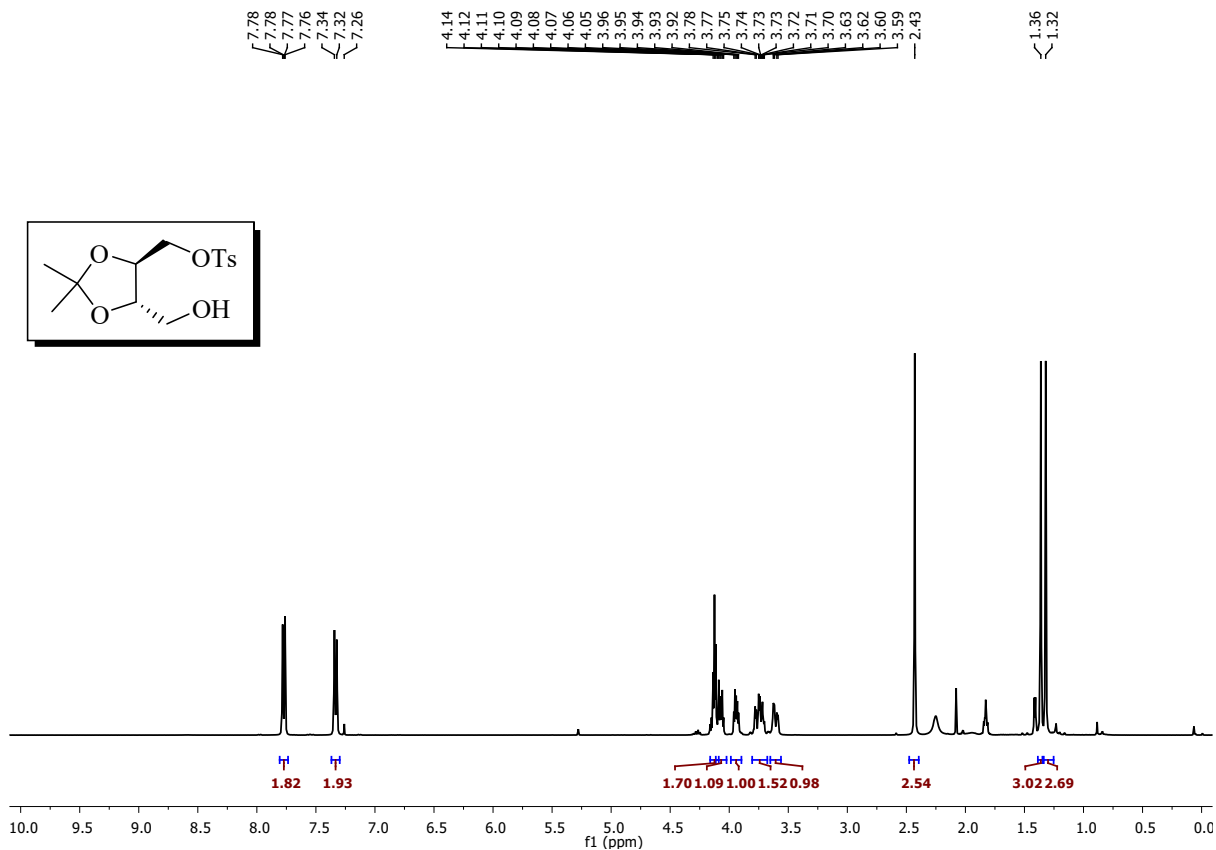

**<sup>13</sup>C (100 MHz) NMR of compound B3 in CDCl<sub>3</sub>**

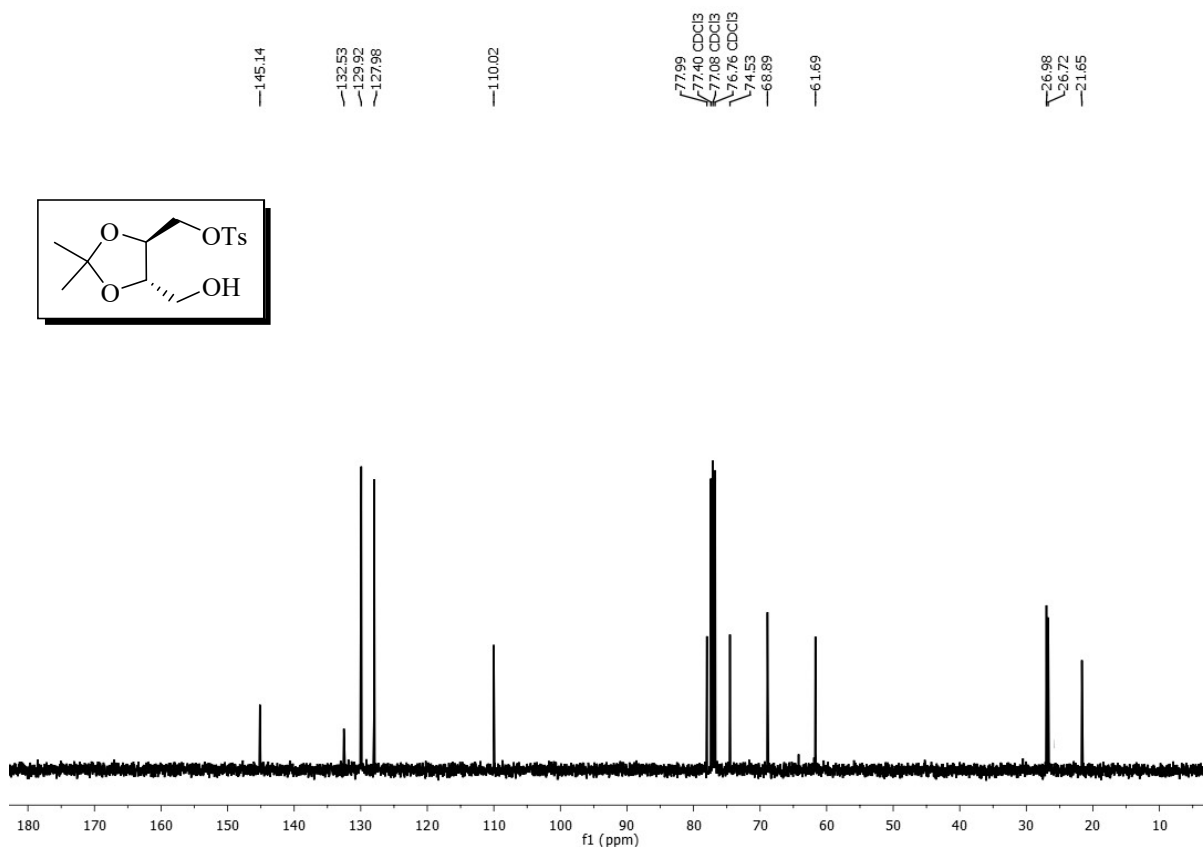

**DEPT (100 MHz) NMR of compound B3 in CDCl<sub>3</sub>**

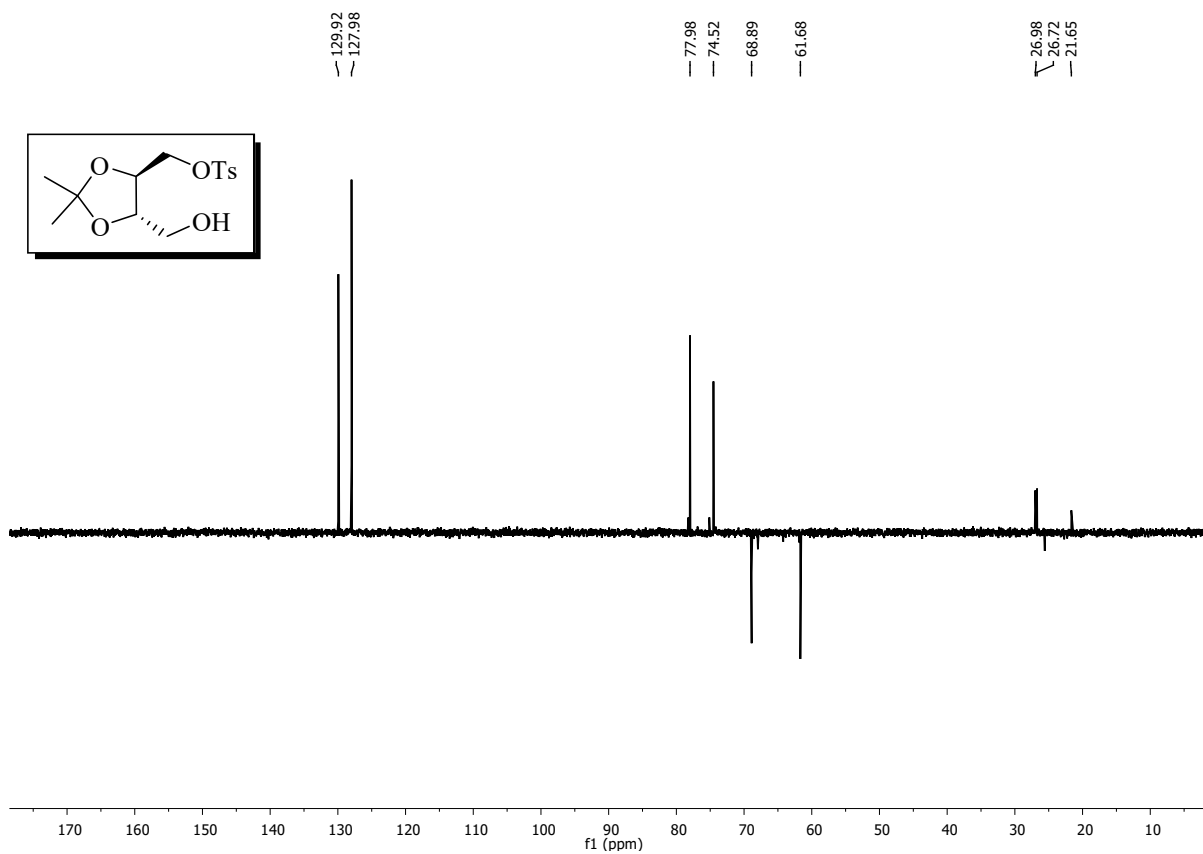

$^1\text{H}$  (400 MHz) NMR of compound 43 in  $\text{CDCl}_3$

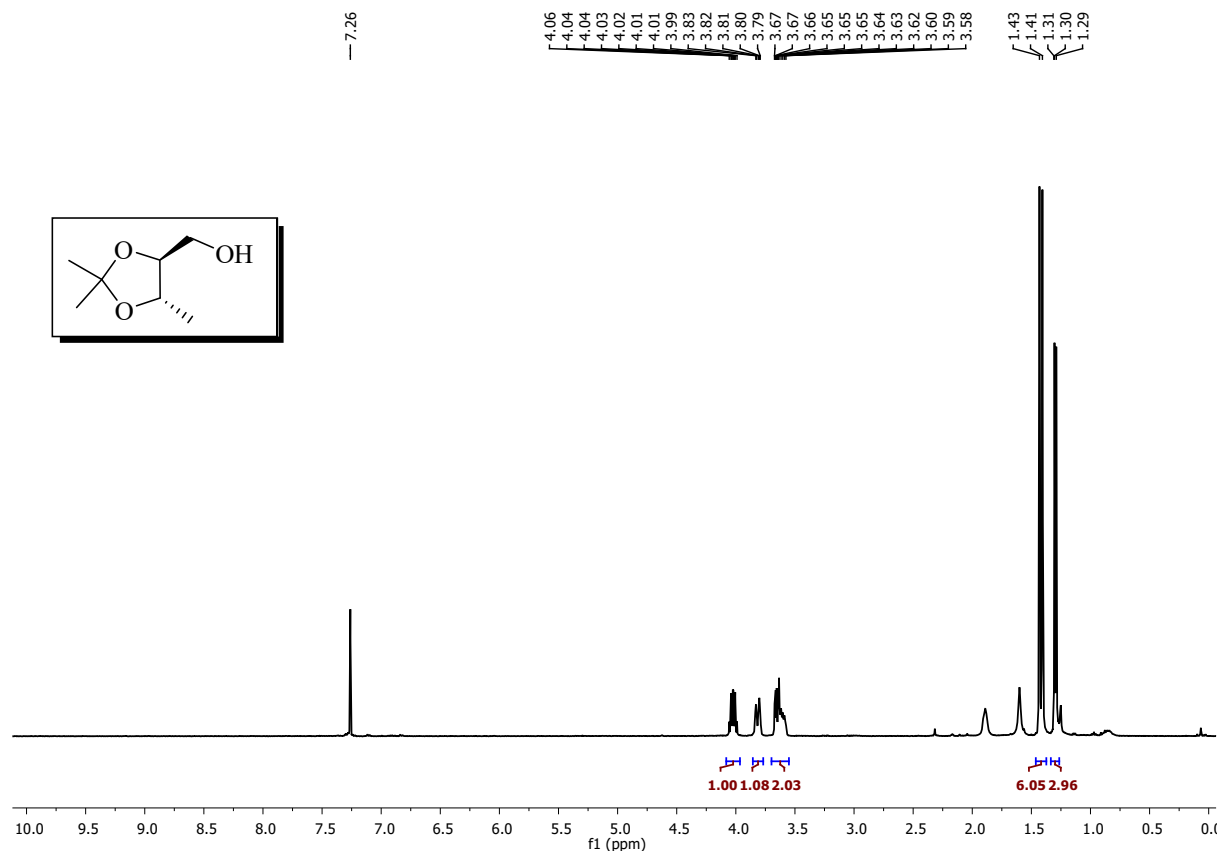

**$^{13}\text{C}$  (100 MHz) NMR of compound 43 in  $\text{CDCl}_3$**

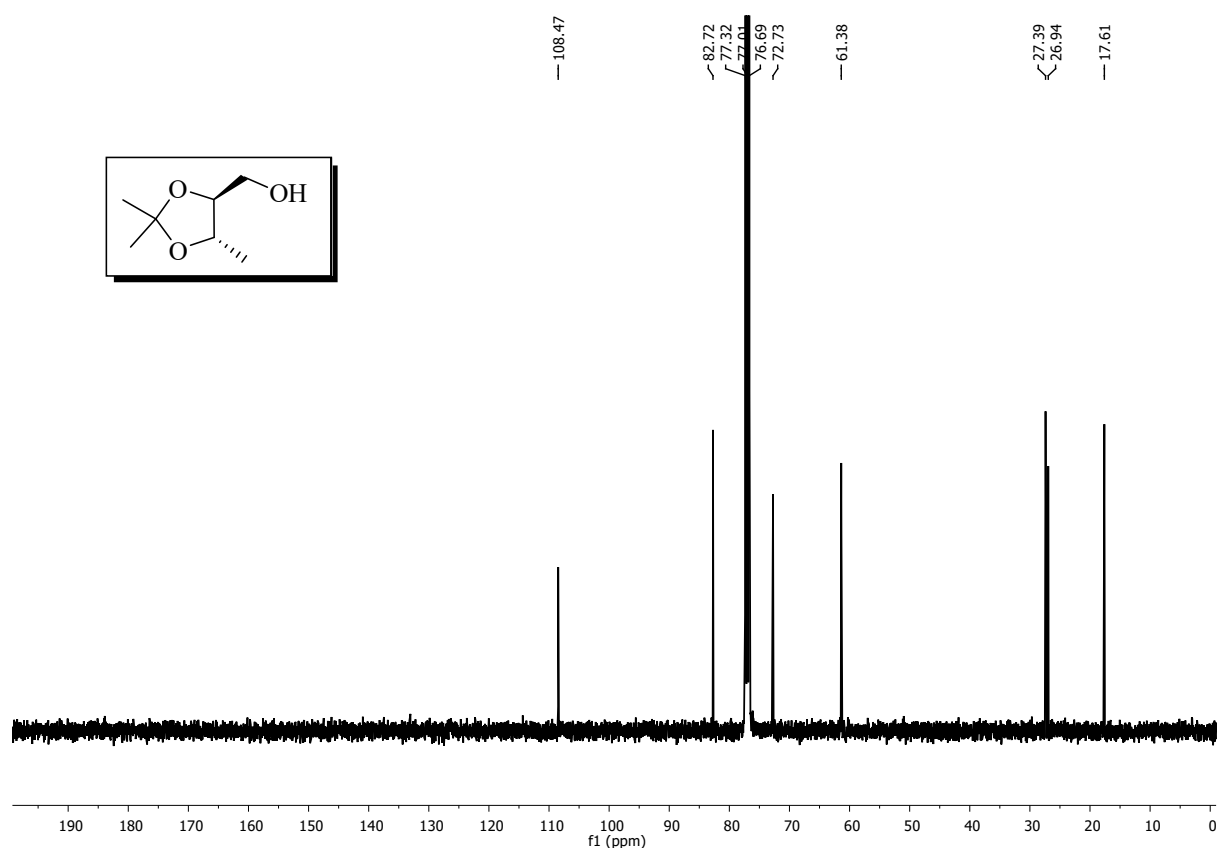

**DEPT (100 MHz) NMR of compound 43 in  $\text{CDCl}_3$**

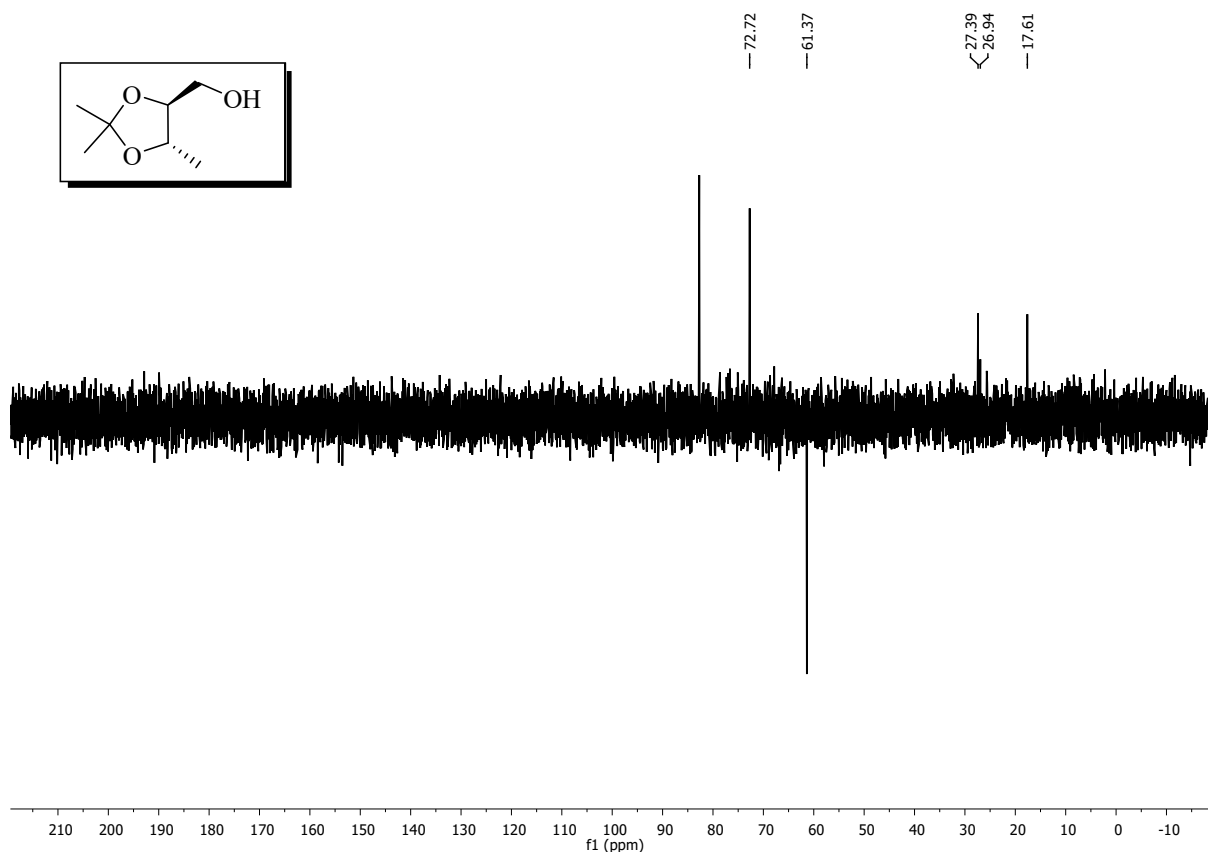

$^1\text{H}$  (400 MHz) NMR of compound 42 in  $\text{CDCl}_3$

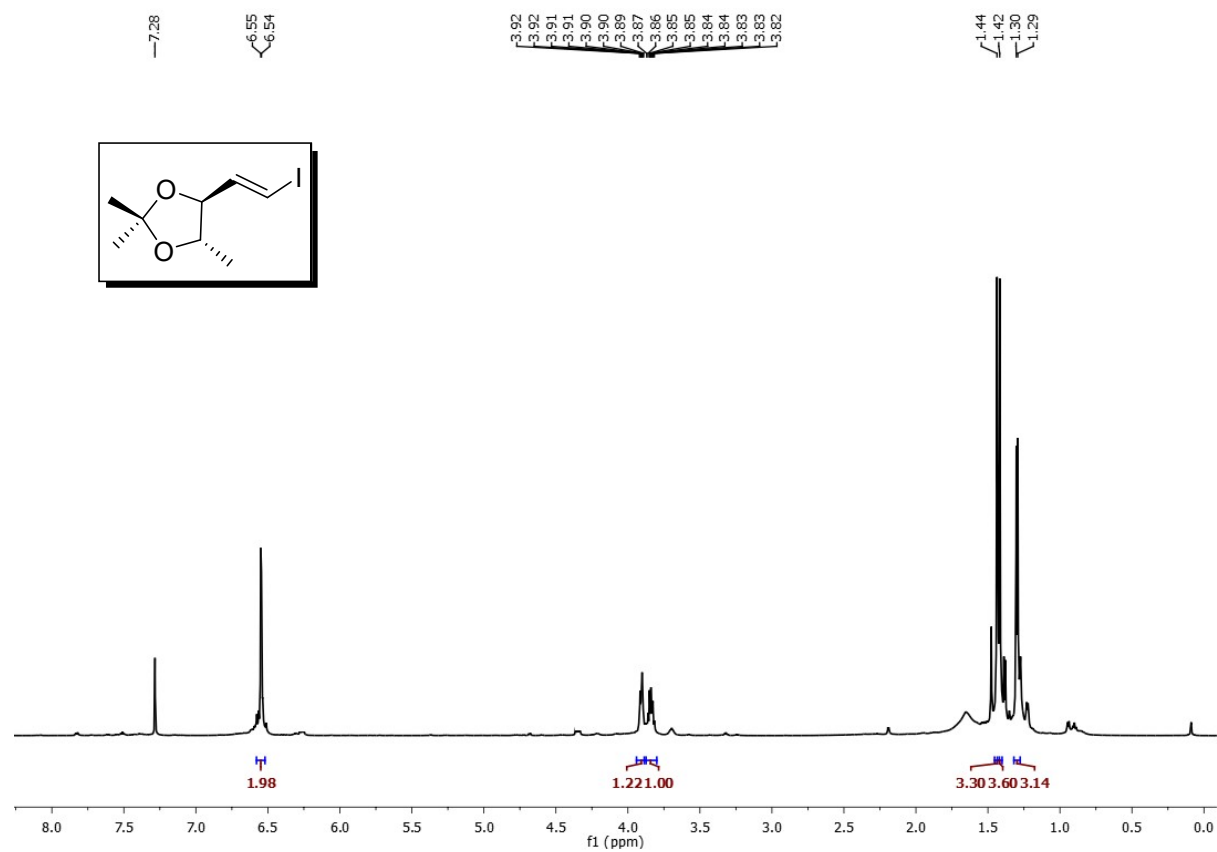

**$^{13}\text{C}$  (100 MHz) NMR of compound 42 in  $\text{CDCl}_3$**

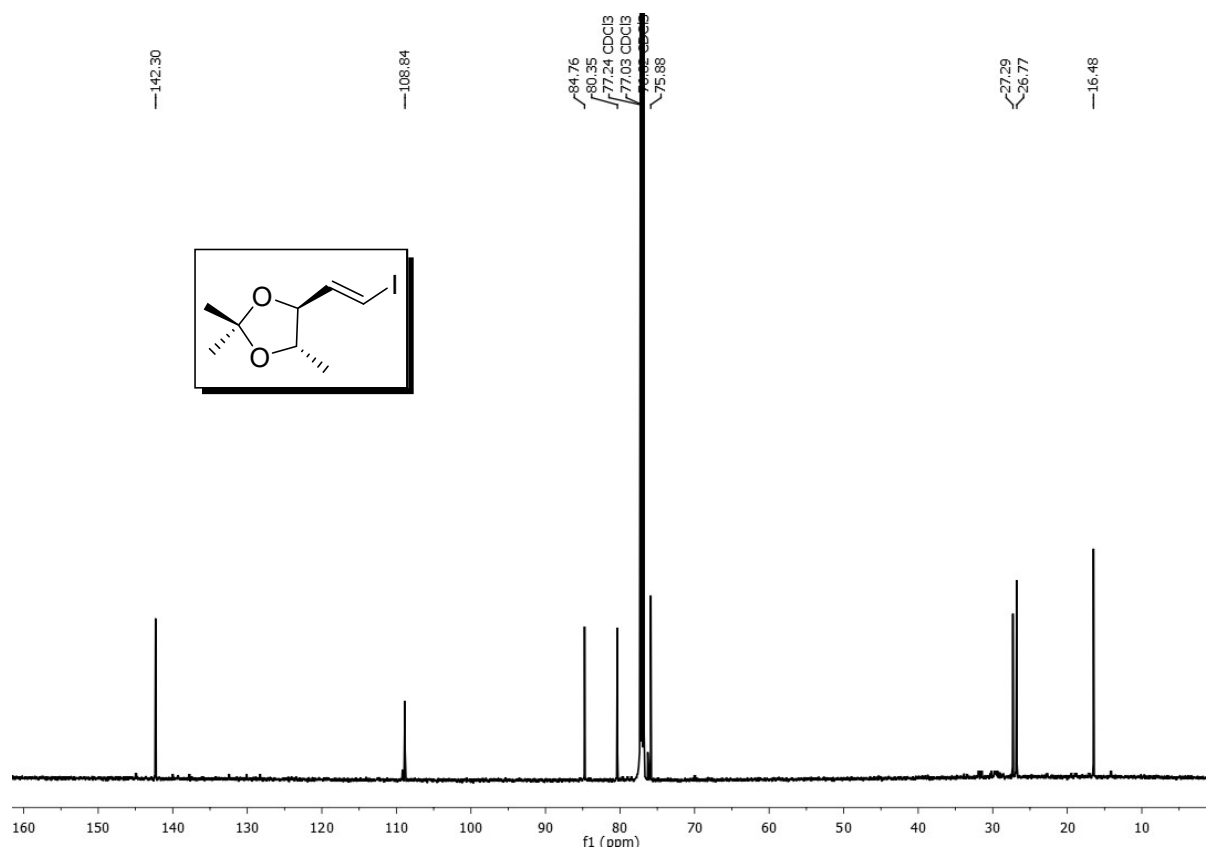

**DEPT (100 MHz) NMR of compound 42 in  $\text{CDCl}_3$**

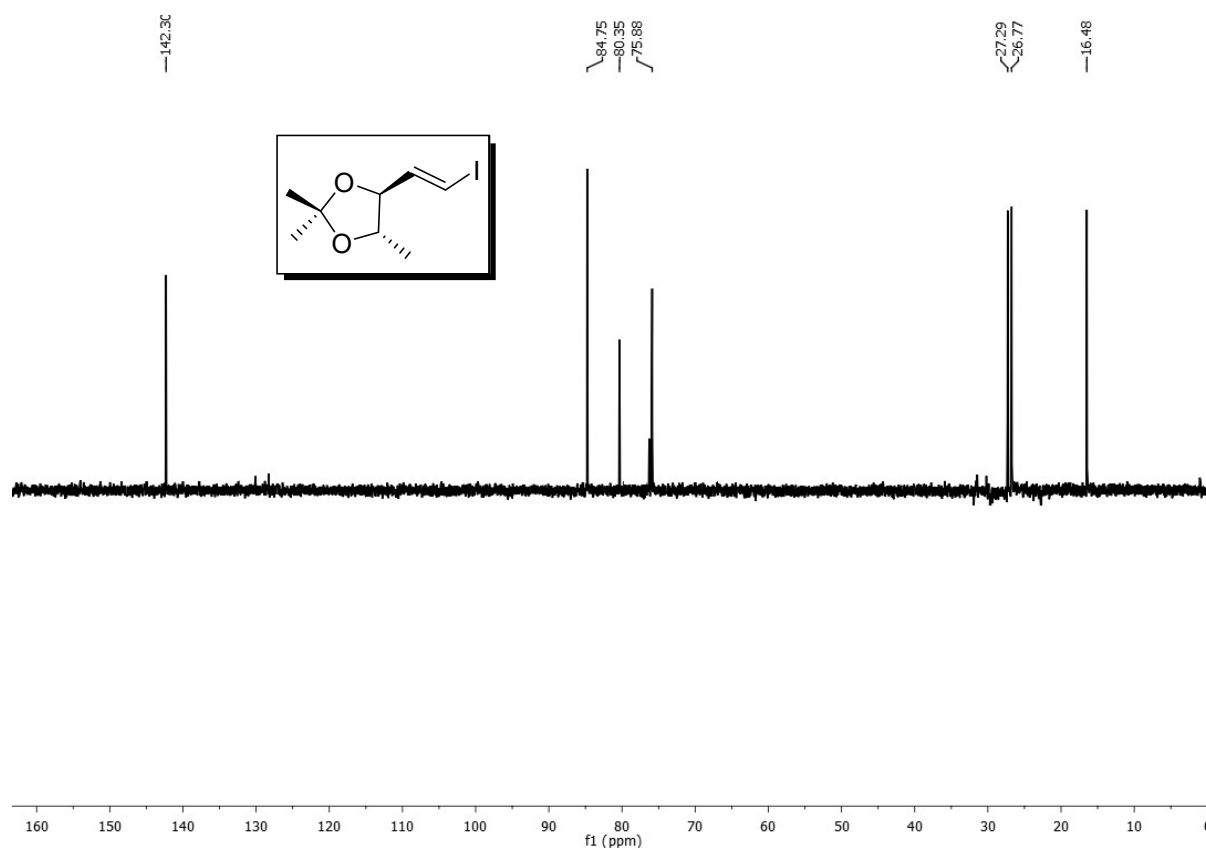



**$^1\text{H}$  (400 MHz) NMR of compound 45 in  $\text{CDCl}_3$**

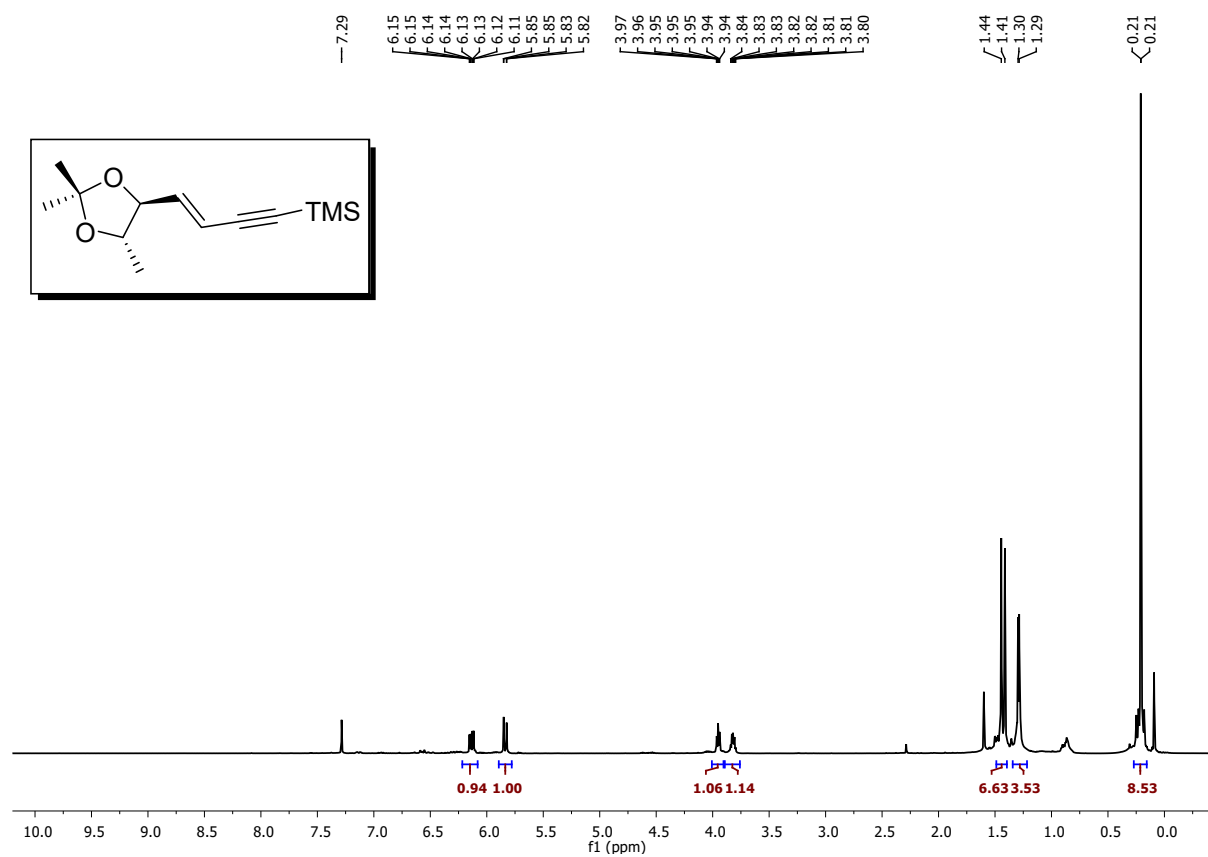

**$^{13}\text{C}$  (100 MHz) NMR of compound 45 in  $\text{CDCl}_3$**

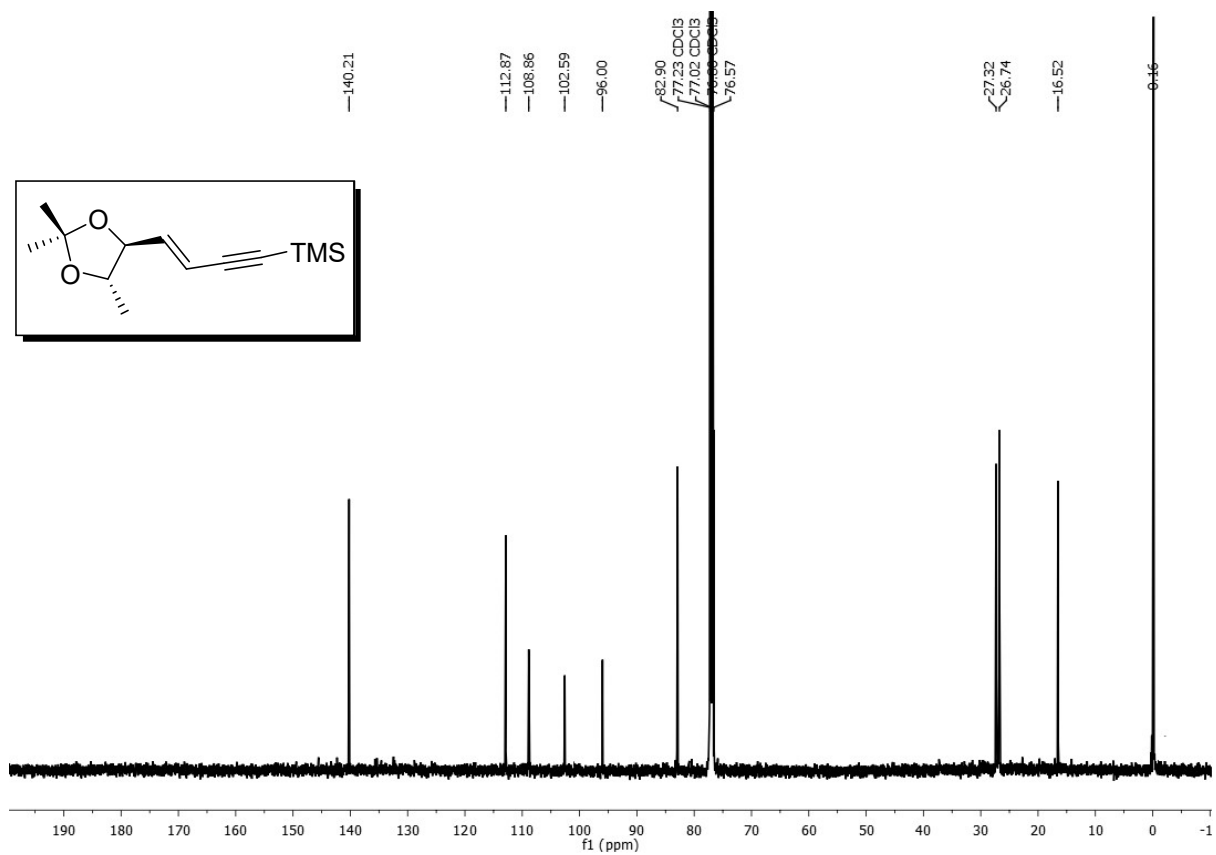

**DEPT (100 MHz) NMR of compound 45 in CDCl<sub>3</sub>**

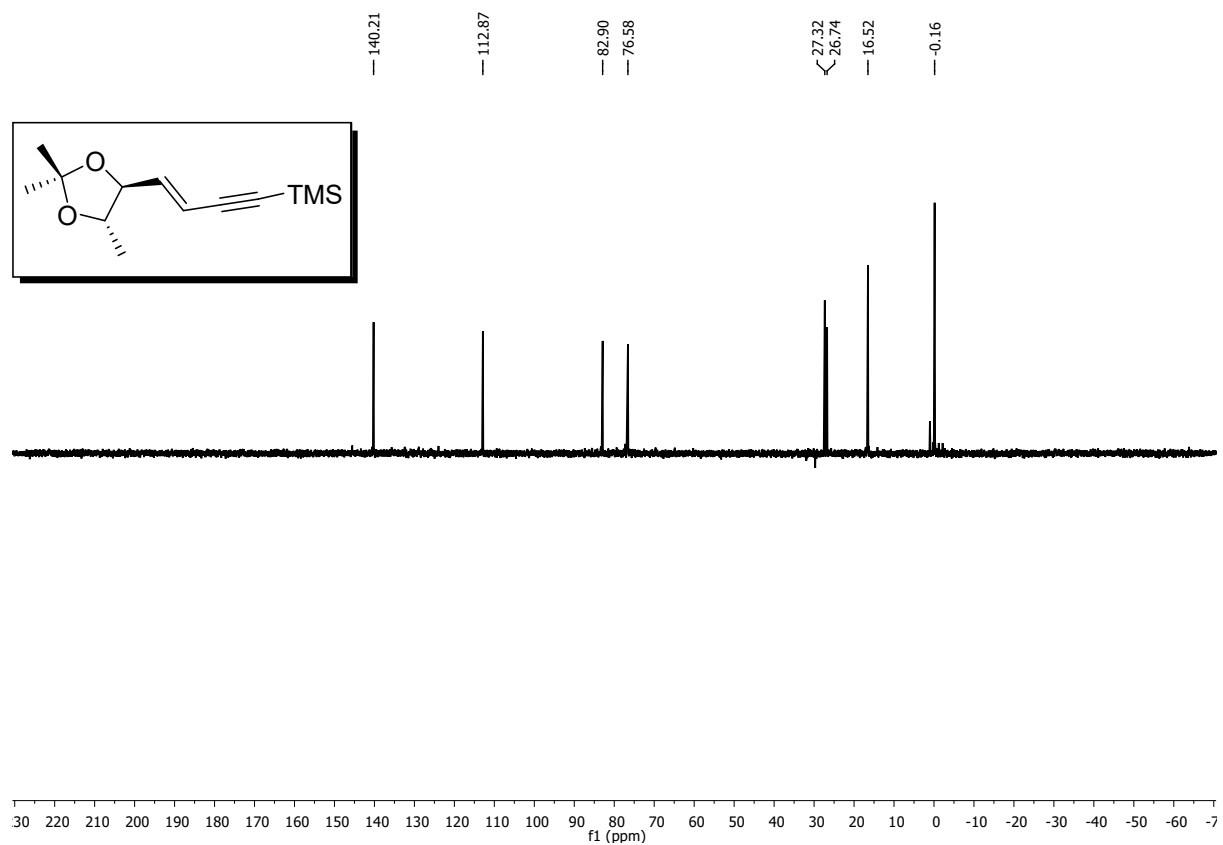

### $^1\text{H}$ (400 MHz) NMR of compound 41 in $\text{CDCl}_3$

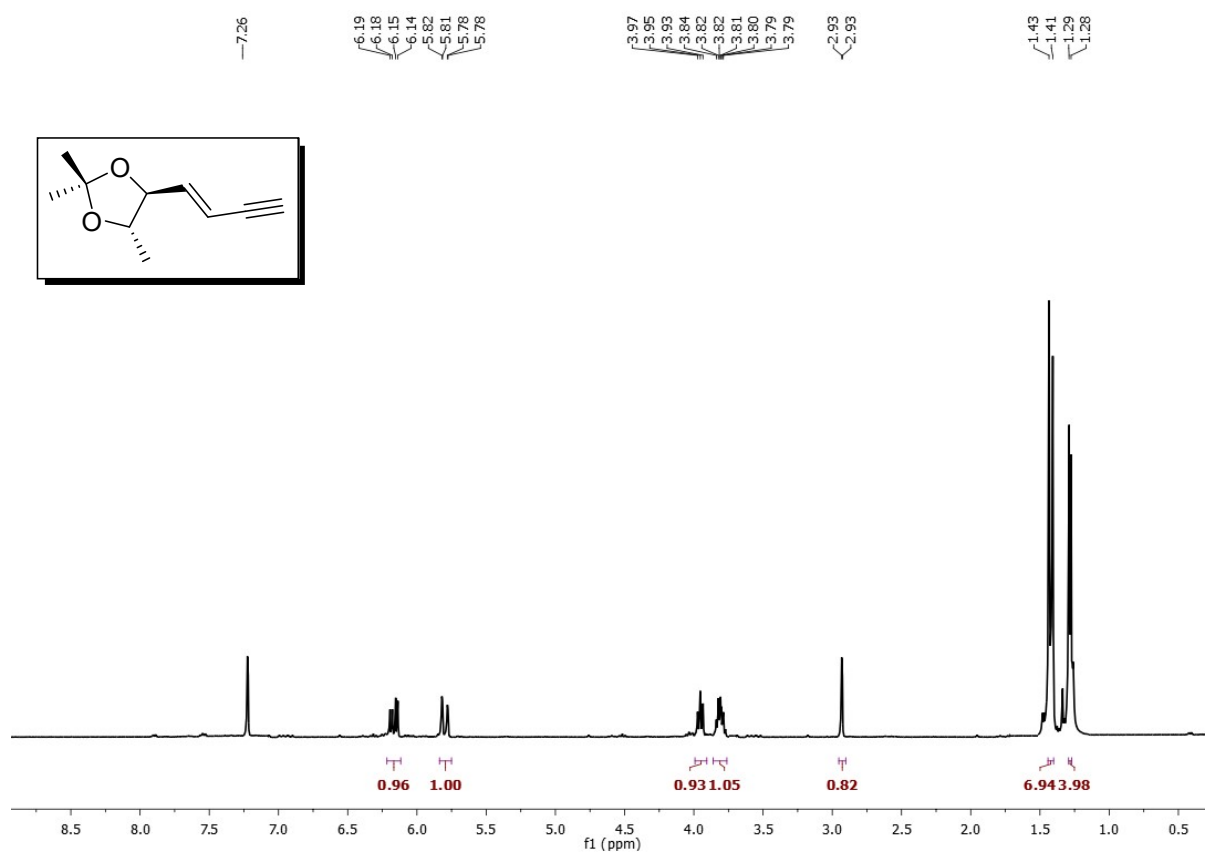

### $^{13}\text{C}$ (100 MHz) NMR of compound 41 in $\text{CDCl}_3$

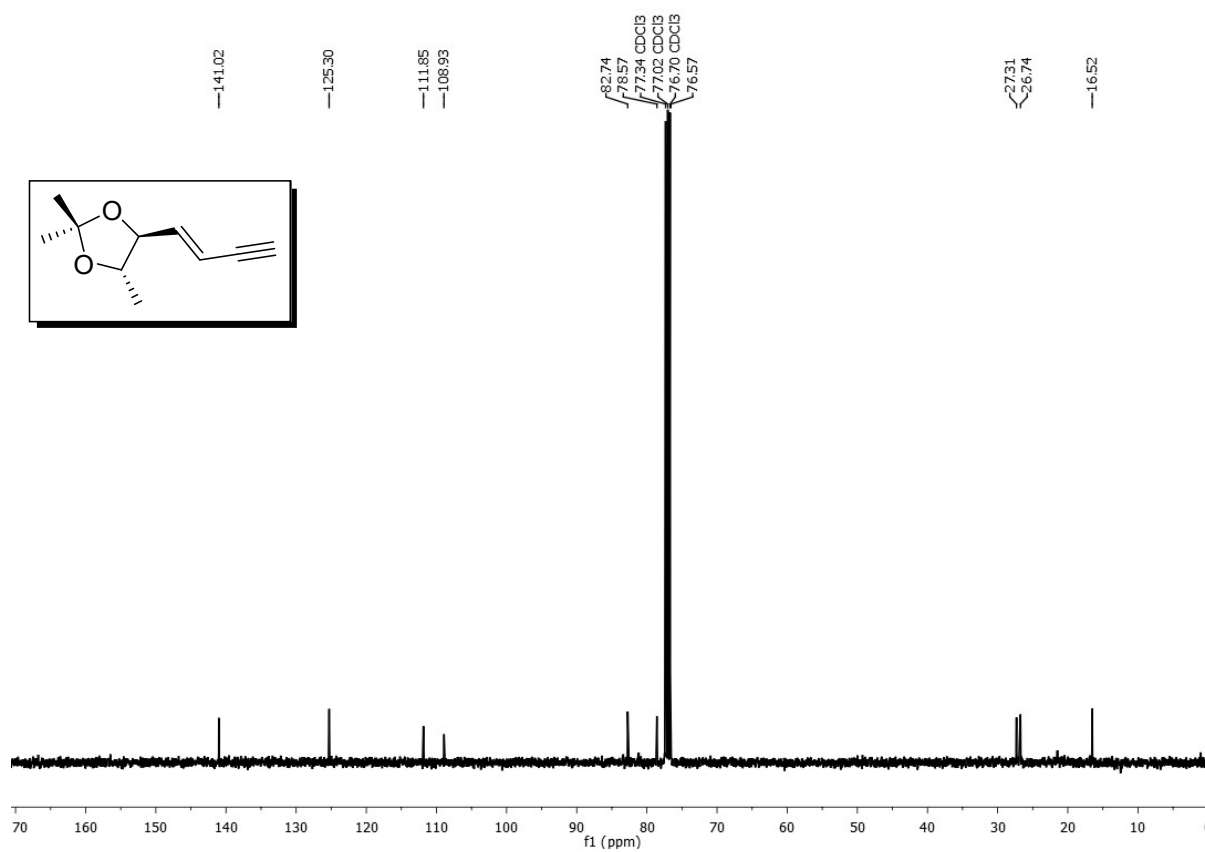

**DEPT (100 MHz) NMR of compound 41 in CDCl<sub>3</sub>**

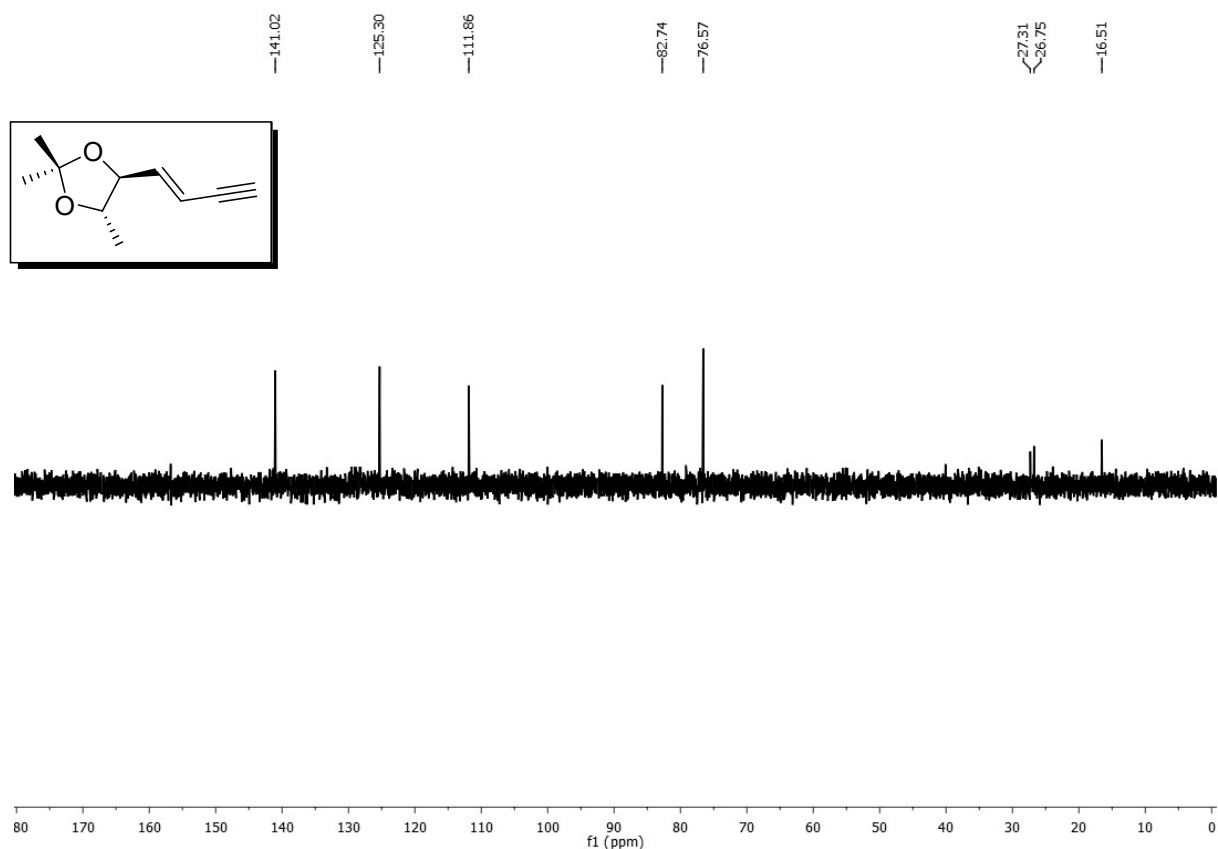

**<sup>1</sup>H (600 MHz) NMR of compound 46 in CDCl<sub>3</sub>**

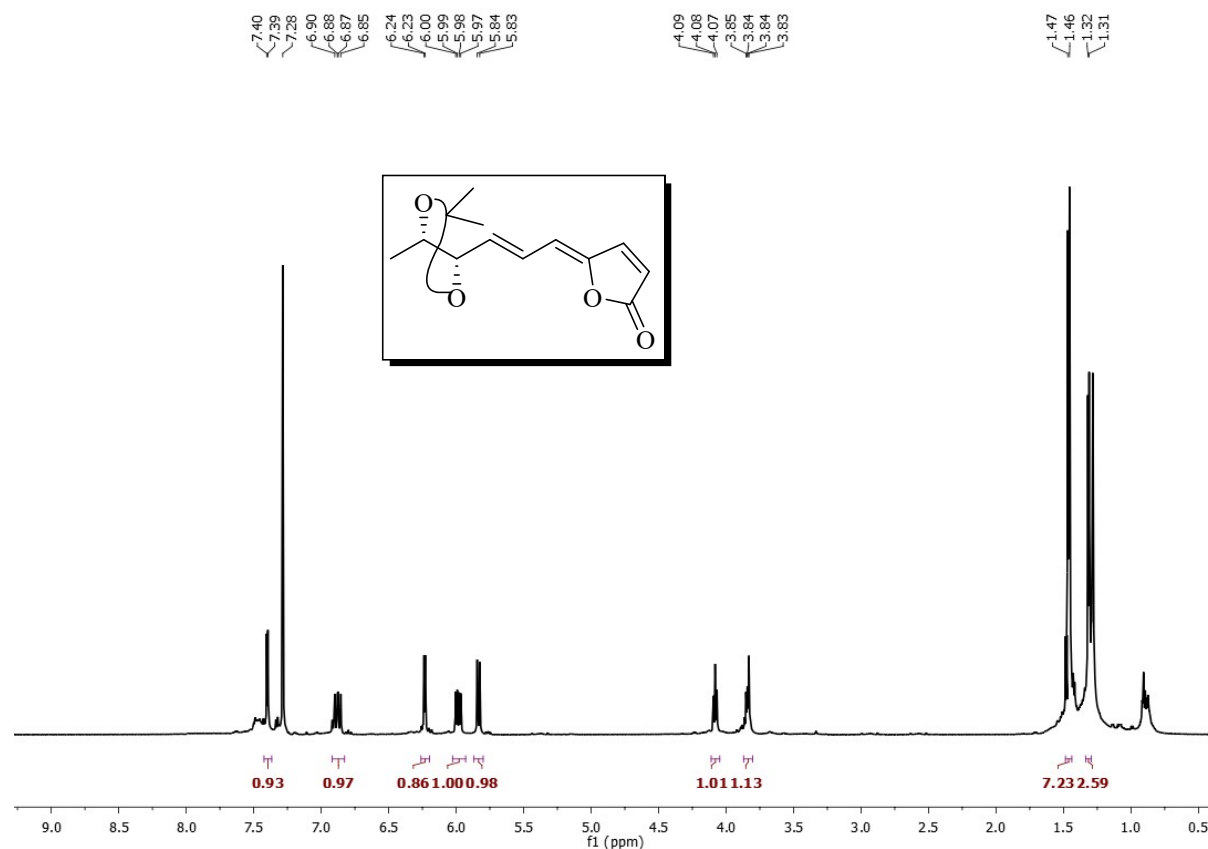

### $^{13}\text{C}$ (150 MHz) NMR of compound 46 in $\text{CDCl}_3$

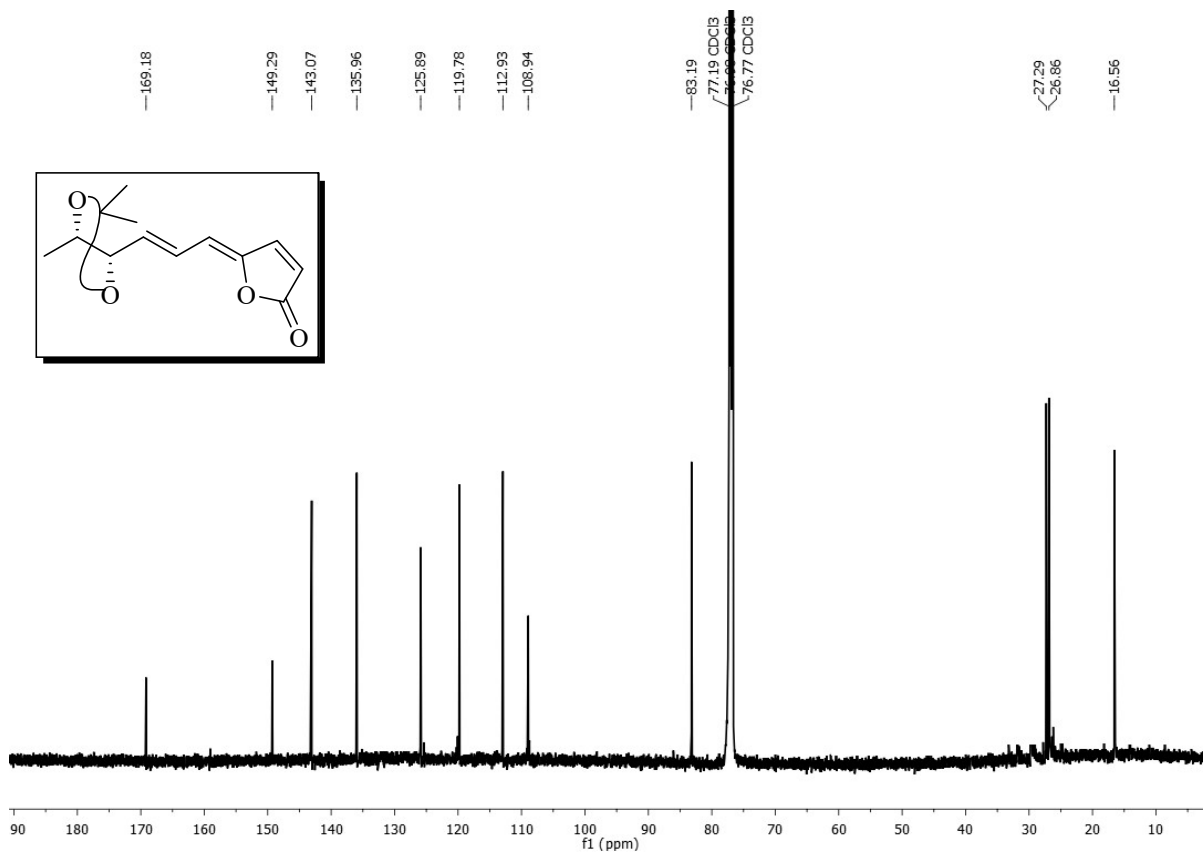

### $^1\text{H}$ (400 MHz) NMR of phomopsolidone C (40) in $\text{CDCl}_3$

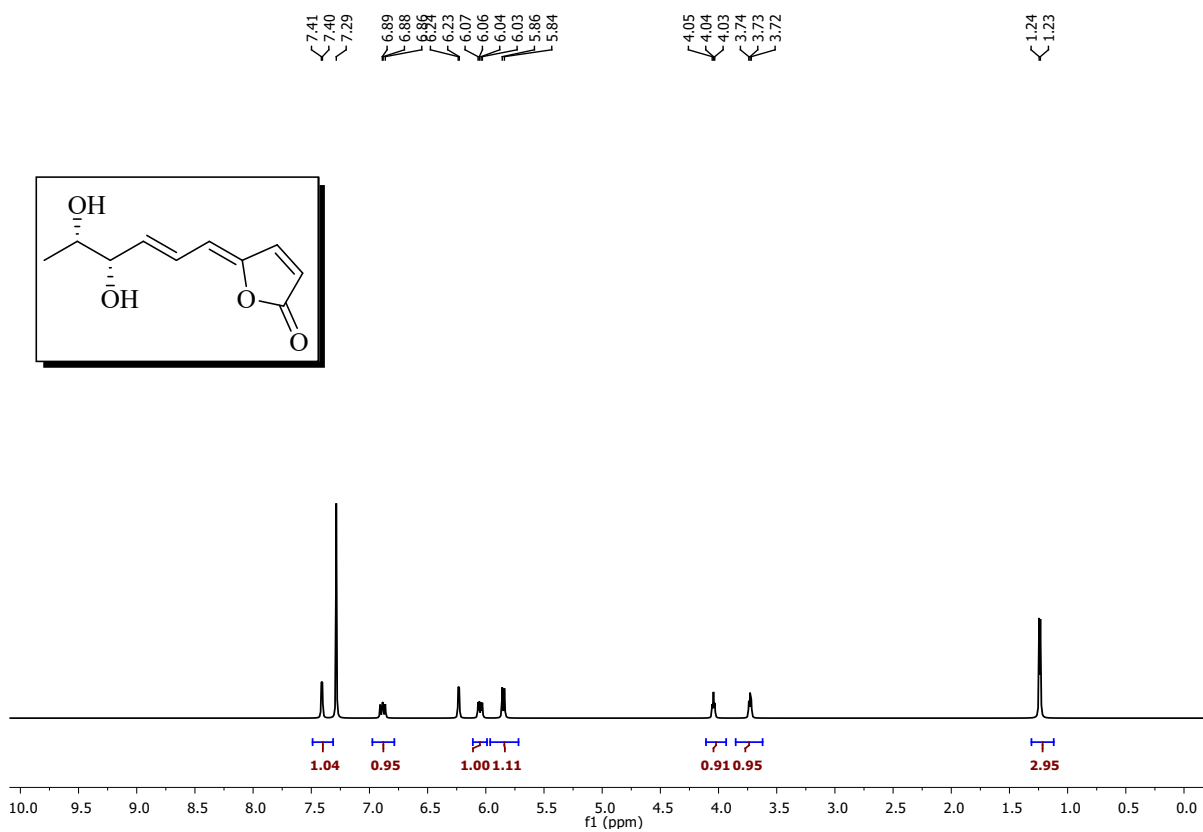

**$^{13}\text{C}$  (150 MHz) NMR of compound phomopsolidone C (40) in  $\text{CDCl}_3$**

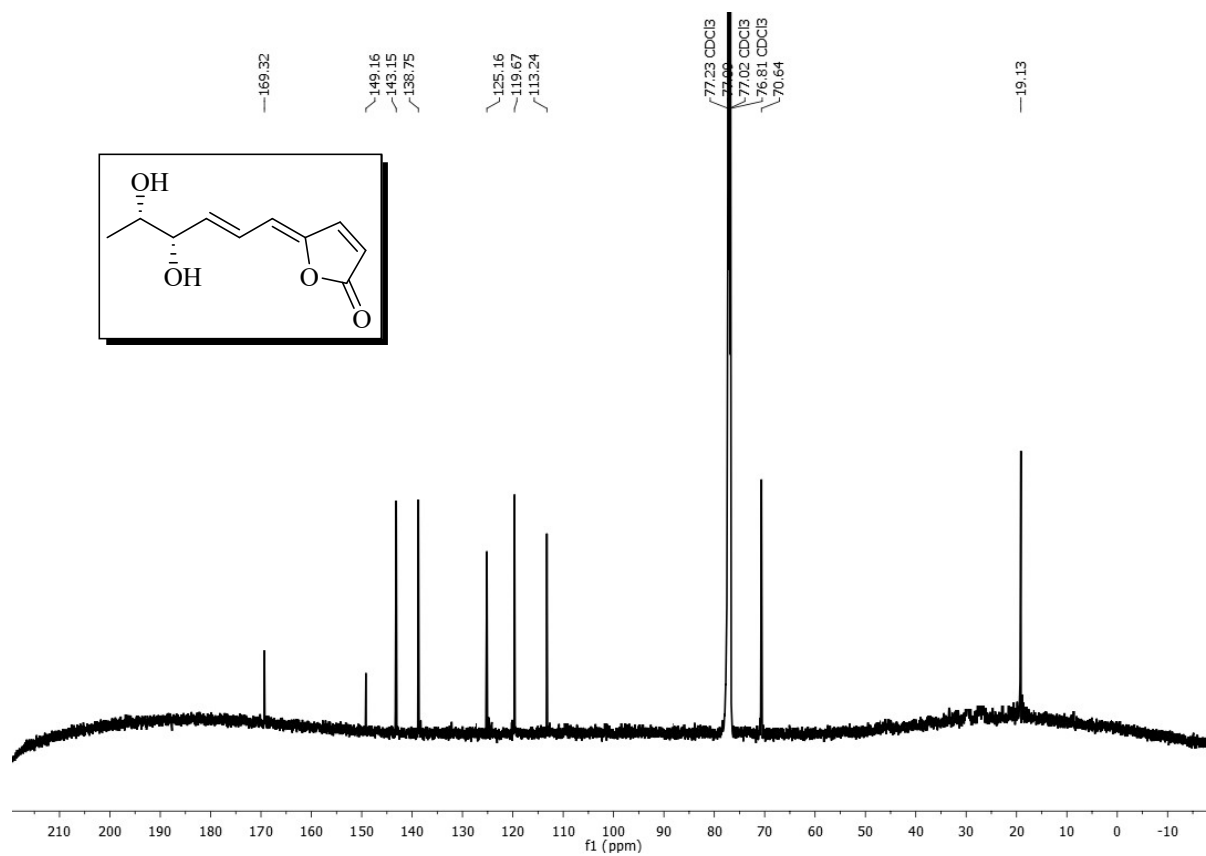

**$^1\text{H}$  (500 MHz) NMR of phomopsolidone D (39) in  $\text{CDCl}_3$**

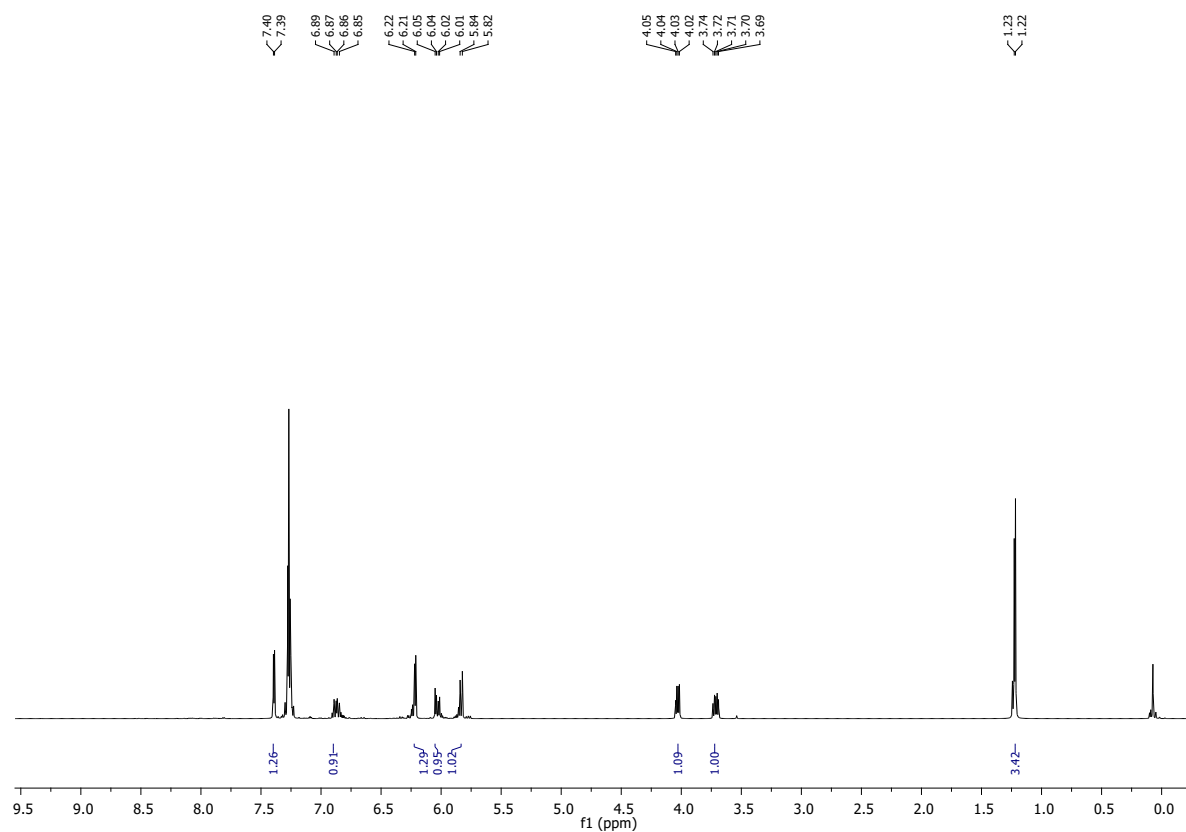

**<sup>13</sup>C (125 MHz) NMR of phomopsolidone D (39) in CDCl<sub>3</sub>**

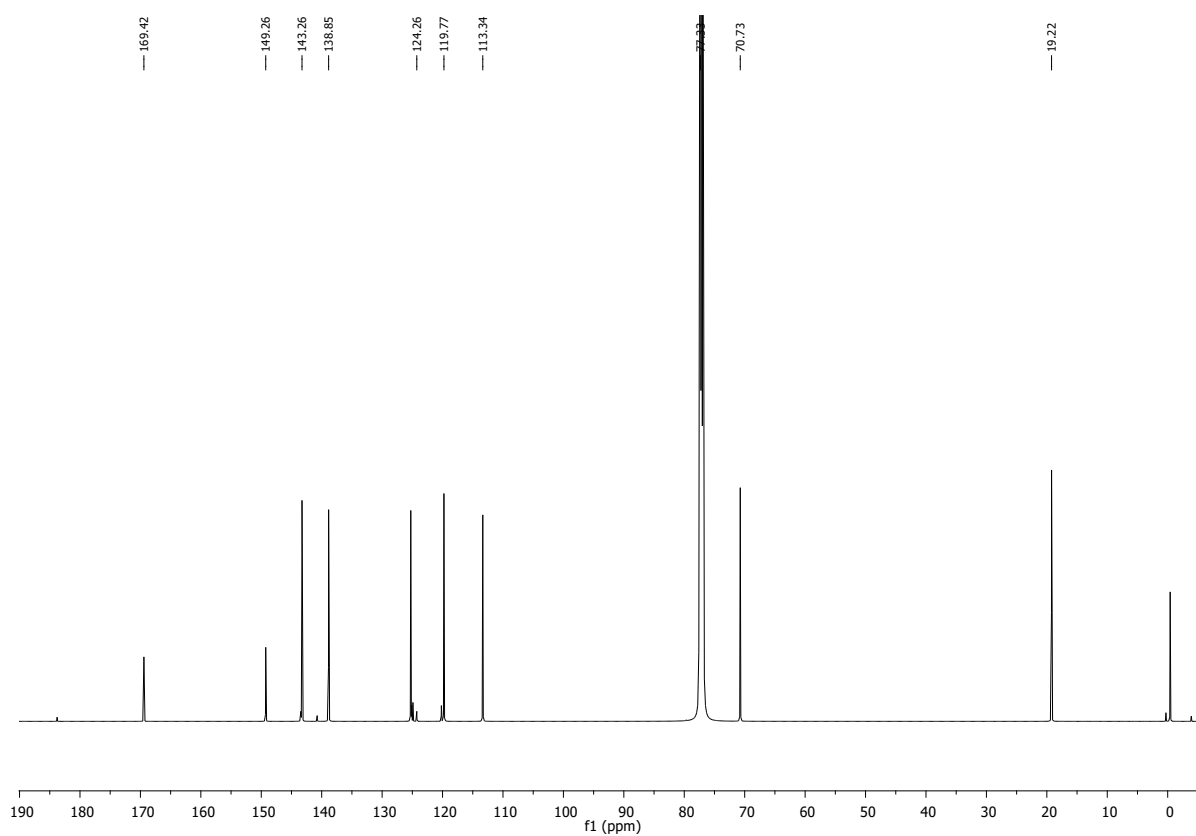

Supplement: d2ob00166g1.pdf [file d2ob00166g1.pdf]
